# Supplementary material for: Genome-wide association mapping identifies novel SNPs for root nodulation and agronomic traits in chickpea
Source: Frontiers journal article supplement (doi:10.3389/fpls.2024.1395938), 2024-10-15
Supplement: Data_Sheet_1.zip [file Data_Sheet_1.zip]

## Sheet: Sheet1
Supplementary Table -2	List of the MTAs identified for RFW for association panel
Blink model									Blink model									Blink model
location 1									Location 2									Location 3
SNP	Chromosome	Position	P.value	maf	nobs	effect	PVE(%)		SNP	Chromosome	Position	P.value	maf	nobs	effect	PVE (%)		SNP	Chromosome	Position	P.value	maf	nobs	effect	PVE(%)
Ca1pos2533483.1	1	2533483	3.69385e-05	0.0483271	269	NA	4.27864		Ca1pos2156475.1	1	2156475	1.12835e-05	0.0613383	269	NA	0		Ca1pos2041490.1	1	2041490	1.13662e-05	0.0947955	269	NA	0.42066
Ca1pos39487400.1	1	39487400	2.65266e-05	0.133829	269	NA	0.772502		Ca1pos2169207.1	1	2169207	2.11699e-06	0.0855019	269	NA	0.813357		Ca1pos2041500.1	1	2041500	3.37489e-06	0.0947955	269	NA	0.135777
Ca2pos10213312.1	2	10213312	1.81358e-05	0.143123	269	NA	1.16625		Ca1pos2239578.1	1	2239578	1.39201e-05	0.0743494	269	NA	1.44696		Ca1pos2041517.1	1	2041517	3.41652e-06	0.0817844	269	NA	1.96514
Ca2pos35125115.1	2	35125115	3.4574e-05	0.10223	269	NA	0.686361		Ca1pos2474918.1	1	2474918	3.69234e-06	0.0520446	269	NA	0		Ca1pos34151789.1	1	34151789	6.6805e-05	0.0576208	269	NA	0.976201
Ca3pos8236467.1	3	8236467	1.04047e-05	0.10223	269	NA	0.26104		Ca1pos2541034.1	1	2541034	1.03851e-05	0.0483271	269	NA	0		Ca2pos1047390.1	2	1047390	1.88116e-05	0.260223	269	NA	0.31951
Ca3pos12201910.1	3	12201910	4.31491e-05	0.379182	269	NA	0		Ca1pos2573265.1	1	2573265	5.95957e-06	0.0687732	269	NA	0		Ca2pos1470268.1	2	1470268	2.30729e-05	0.0483271	269	NA	1.85948
Ca3pos20226296.1	3	20226296	4.15774e-05	0.219331	269	NA	0.591245		Ca1pos2573269.1	1	2573269	2.8832e-06	0.063197	269	NA	1.44555e-09		Ca2pos3709486.1	2	3709486	0.000121132	0.0669145	269	NA	0.127211
Ca4pos17865646.1	4	17865646	3.40064e-05	0.314126	269	NA	0.150845		Ca2pos26426814.1	2	26426814	1.12774e-05	0.070632	269	NA	0		Ca3pos16047910.1	3	16047910	9.27114e-05	0.187732	269	NA	0.283598
Ca4pos23701036.1	4	23701036	3.35589e-05	0.0576208	269	NA	0.411478		Ca3pos12201915.1	3	12201915	1.32734e-05	0.111524	269	NA	3.25138e-09		Ca4pos37186531.1	4	37186531	2.7237e-06	0.144981	269	NA	0.134141
Ca5pos11688148.1	5	11688148	4.82163e-06	0.434944	269	NA	3.29388e-08		Ca3pos38057193.1	3	38057193	5.36956e-06	0.0762082	269	NA	0		Ca4pos38222944.1	4	38222944	0.00012468	0.130112	269	NA	28.0615
Ca5pos21908823.1	5	21908823	3.13523e-05	0.47026	269	NA	0.689512		Ca3pos38057228.1	3	38057228	1.02682e-05	0.0743494	269	NA	1.08981e-07		Ca5pos11344897.1	5	11344897	0.000131115	0.0539033	269	NA	0.744369
Ca5pos26646592.1	5	26646592	1.52689e-05	0.0408922	269	NA	0.652108		Ca3pos38063432.1	3	38063432	5.76515e-06	0.0892193	269	NA	2.04172e-09		Ca5pos41084221.1	5	41084221	5.52946e-05	0.0501859	269	NA	0.388751
Ca5pos47062706.1	5	47062706	8.01606e-06	0.226766	269	NA	0.343293		Ca3pos38063441.1	3	38063441	7.85368e-06	0.0966543	269	NA	0		Ca6pos11308748.1	6	11308748	2.30729e-05	0.163569	269	NA	0.248573
Ca7pos18940916.1	7	18940916	2.79662e-05	0.492565	269	NA	0.893805		Ca3pos38068966.1	3	38068966	1.18412e-05	0.0817844	269	NA	0.19521		Ca6pos34164117.1	6	34164117	6.63562e-07	0.416357	269	NA	0.178193
Ca7pos24504110.1	7	24504110	3.92675e-05	0.447955	269	NA	0		Ca3pos38080247.1	3	38080247	9.01492e-06	0.0669145	269	NA	8.47732e-10		Ca6pos38012786.1	6	38012786	4.43458e-05	0.126394	269	NA	0.285379
Ca7pos37474983.1	7	37474983	3.73355e-05	0.0687732	269	NA	0.375308		Ca3pos38080272.1	3	38080272	5.06058e-06	0.0743494	269	NA	0.307573		Ca7pos19898936.1	7	19898936	6.00982e-05	0.0947955	269	NA	0.6034
Ca7pos41878061.1	7	41878061	3.41778e-05	0.0724907	269	NA	0.542091		Ca4pos32325972.1	4	32325972	1.19114e-05	0.286245	269	NA	0		Ca7pos22479713.1	7	22479713	3.19843e-06	0.133829	269	NA	0.669489
Ca7pos47187758.1	7	47187758	2.47473e-05	0.0966543	269	NA	0.464221		Ca6pos1941356.1	6	1941356	1.08738e-05	0.0836431	269	NA	0.710709		Ca7pos42978285.1	7	42978285	0.000110251	0.128253	269	NA	7.68374e-08
Ca7pos47187760.1	7	47187760	2.08117e-05	0.0892193	269	NA	1.13589		Ca7pos6667809.1	7	6667809	1.40839e-05	0.0613383	269	NA	0.462597		Ca8pos7777575.1	8	7777575	2.9521e-07	0.490706	269	NA	0.628494
Ca8pos7889604.1	8	7889604	2.61159e-05	0.486989	269	NA	0.637812		Ca7pos46119789.1	7	46119789	1.42155e-05	0.0799257	269	NA	0.634305		Ca8pos10952050.1	8	10952050	0.000113573	0.291822	269	NA	7.45294e-09
FarmCPU model									FarmCPU model										FarmCPU model
location 1									Location 2									location 3									Location 4
SNP	Chromosome	Position	P.value	maf	nobs	effect	PVE(%)		SNP	Chromosome	Position	P.value	maf	nobs	effect	PVE(%)		SNP	Chromosome	Position	P.value	maf	nobs	effect	PVE(%)		SNP	Chromosome	Position	P.value	maf	nobs	effect
Ca1pos2533483.1	1	2533483	3.70208e-05	0.0483271	269	-1.50904	4.27864		Ca1pos2156475.1	1	2156475	1.13227e-05	0.0613383	269	1.18096	0		Ca1pos7378050.1	1	7378050	3.14638e-05	0.204461	269	0.641442	0.914874	1	Ca1pos16180110.1	1	16180110	2.5e-05	0.0929368	269	-0.190617
Ca1pos39487400.1	1	39487400	2.65876e-05	0.133829	269	-1.24266	0.772502		Ca1pos2169207.1	1	2169207	2.12543e-06	0.0855019	269	1.18633	0.813357		Ca2pos28497931.1	2	28497931	4.76702e-11	0.241636	269	0.920948	0.596465	2	Ca1pos16426681.1	1	16426681	2.88e-05	0.0966543	269	0.190307
Ca2pos10213312.1	2	10213312	1.81791e-05	0.143123	269	1.06449	1.16625		Ca1pos2239578.1	1	2239578	1.39675e-05	0.0743494	269	1.1488	1.44696		Ca2pos29170629.1	2	29170629	2.07321e-07	0.282528	269	-0.731668	0.329817	3	Ca1pos16428577.1	1	16428577	2.97e-05	0.0910781	269	0.195252
Ca2pos35125115.1	2	35125115	3.46515e-05	0.10223	269	-1.25327	0.686361		Ca1pos2474918.1	1	2474918	3.70643e-06	0.0520446	269	-1.36181	0		Ca3pos14889528.1	3	14889528	4.26274e-08	0.17658	269	0.805847	0.614107	4	Ca1pos18227074.1	1	18227074	7.85e-06	0.249071	269	0.206127
Ca3pos8236467.1	3	8236467	1.04308e-05	0.10223	269	-1.42272	0.26104		Ca1pos2541034.1	1	2541034	1.04215e-05	0.0483271	269	1.31847	0		Ca3pos37003045.1	3	37003045	8.02923e-10	0.0539033	269	1.17416	2.88338	5	Ca1pos33469505.1	1	33469505	1.8e-05	0.0483271	269	0.328954
Ca3pos12201910.1	3	12201910	4.32438e-05	0.379182	269	1.24349	0		Ca1pos2573265.1	1	2573265	5.98144e-06	0.0687732	269	1.20769	0		Ca4pos20267143.1	4	20267143	6.22104e-08	0.174721	269	0.806871	0.471898	6	Ca2pos5631759.1	2	5631759	1.48e-05	0.070632	269	0.240807
Ca3pos20226296.1	3	20226296	4.1669e-05	0.219331	269	1.0716	0.591245		Ca1pos2573269.1	1	2573269	2.89442e-06	0.063197	269	-1.26012	1.44555e-09		Ca4pos37179013.1	4	37179013	5.02702e-05	0.152416	269	-0.503876	10.7769	7	Ca2pos20477233.1	2	20477233	2.35e-05	0.0464684	269	0.333468
Ca4pos17865646.1	4	17865646	3.40828e-05	0.314126	269	-0.666177	0.150845		Ca2pos26426814.1	2	26426814	1.13165e-05	0.070632	269	1.12643	0		Ca4pos42120377.1	4	42120377	3.84315e-05	0.498141	269	-5.62182	0.581341	8	Ca2pos26632810.1	2	26632810	1.47e-05	0.035316	269	0.381432
Ca4pos23701036.1	4	23701036	3.36344e-05	0.0576208	269	-1.69084	0.411478		Ca3pos12201915.1	3	12201915	1.33189e-05	0.111524	269	1.05527	3.25138e-09		Ca4pos43577854.1	4	43577854	7.34105e-06	0.120818	269	0.70875	0.600451	9	Ca3pos9066508.1	3	9066508	6.18e-06	0.247212	269	-0.207468
Ca5pos11688148.1	5	11688148	4.83452e-06	0.434944	269	1.75483	3.29388e-08		Ca3pos38057193.1	3	38057193	5.38944e-06	0.0762082	269	1.0706	0		Ca5pos6753920.1	5	6753920	3.55227e-07	0.325279	269	-0.703728	0.270383	10	Ca4pos25071362.1	4	25071362	3.85e-06	0.423792	269	-0.288632
Ca5pos21908823.1	5	21908823	3.14232e-05	0.47026	269	2.31458	0.689512		Ca3pos38057228.1	3	38057228	1.03042e-05	0.0743494	269	-1.04899	1.08981e-07		Ca5pos17470070.1	5	17470070	2.8649e-05	0.0576208	269	0.993438	7.61308	11	Ca4pos25071412.1	4	25071412	2.64e-06	0.410781	269	-0.275719
Ca5pos26646592.1	5	26646592	1.53058e-05	0.0408922	269	-2.05039	0.652108		Ca3pos38063432.1	3	38063432	5.78637e-06	0.0892193	269	-1.04574	2.04172e-09		Ca5pos45165258.1	5	45165258	7.56463e-06	0.241636	269	0.612907	0.341132	12	Ca4pos37409651.1	4	37409651	2.52e-05	0.126394	269	0.184516
Ca5pos47062706.1	5	47062706	8.03659e-06	0.226766	269	0.852196	0.343293		Ca3pos38063441.1	3	38063441	7.88184e-06	0.0966543	269	-1.00721	0		Ca6pos11308748.1	6	11308748	2.87598e-06	0.163569	269	-0.664459	0.332878	13	Ca5pos2415075.1	5	2415075	1.76e-05	0.0780669	269	-0.244338
Ca7pos18940916.1	7	18940916	2.80302e-05	0.492565	269	-1.3521	0.893805		Ca3pos38068966.1	3	38068966	1.18821e-05	0.0817844	269	-1.03067	0.19521		Ca6pos34164117.1	6	34164117	3.9716e-06	0.416357	269	-0.769863	0.880483	14	Ca5pos30905240.1	5	30905240	2.21e-05	0.0520446	269	0.253319
Ca7pos24504110.1	7	24504110	3.93544e-05	0.447955	269	1.40437	0		Ca3pos38080247.1	3	38080247	9.04686e-06	0.0669145	269	1.116	8.47732e-10		Ca6pos50791651.1	6	50791651	5.08124e-06	0.492565	269	-2.85509	0.754663	15	Ca6pos41197498.1	6	41197498	1.81e-05	0.118959	269	-0.228457
Ca7pos37474983.1	7	37474983	3.74185e-05	0.0687732	269	-1.54696	0.375308		Ca3pos38080272.1	3	38080272	5.07941e-06	0.0743494	269	1.10502	0.307573		Ca6pos50834531.1	6	50834531	2.89956e-05	0.0687732	269	-0.937924	27.2882	16	Ca6pos41197499.1	6	41197499	1.81e-05	0.118959	269	-0.228457
Ca7pos41878061.1	7	41878061	3.42545e-05	0.0724907	269	1.52476	0.542091		Ca4pos32325972.1	4	32325972	1.19526e-05	0.286245	269	0.901777	0		Ca7pos38101654.1	7	38101654	3.15795e-09	0.319703	269	-0.882084	0.811659	17	Ca6pos58075750.1	6	58075750	2.31e-05	0.0446097	269	0.335737
Ca7pos47187758.1	7	47187758	2.48046e-05	0.0966543	269	-1.38444	0.464221		Ca6pos1941356.1	6	1941356	1.09117e-05	0.0836431	269	1.09023	0.710709		Ca7pos45379870.1	7	45379870	3.05822e-06	0.141264	269	0.680494	0.57085	18	Ca7pos14155443.1	7	14155443	7.99e-08	0.035316	269	0.470051
Ca7pos47187760.1	7	47187760	2.08607e-05	0.0892193	269	-1.44179	1.13589		Ca7pos6667809.1	7	6667809	1.41319e-05	0.0613383	269	-1.19827	0.462597		Ca8pos7777575.1	8	7777575	6.88278e-10	0.490706	269	-3.55676	0.807821	19	Ca7pos14155451.1	7	14155451	8.53e-08	0.035316	269	0.468725
Ca8pos7889604.1	8	7889604	2.61761e-05	0.486989	269	-2.72073	0.637812		Ca7pos46119789.1	7	46119789	1.42639e-05	0.0799257	269	-1.22724	0.634305		Ca8pos9965189.1	8	9965189	8.3885e-06	0.0855019	269	-0.911638	0.208567	1	Ca7pos36933084.1	7	36933084	6.75e-06	0.187732	269	-0.217332
MLM model
Location 1											Location 2											Location 3											Location 4
SNP	Chromosome	Position	P.value	maf	nobs	Rsquare.of.Model.without.SNP	Rsquare.of.Model.with.SNP	effect	PVE(%)		SNP	Chromosome	Position	P.value	maf	nobs		Rsquare.of.Model.with.SNP	effect	(PVE%)		SNP	Chromosome	Position	P.value	maf	nobs	Rsquare.of.Model.without.SNP	Rsquare.of.Model.with.SNP	effect	PVE(%)		SNP		Chromosome	Position	P.value	maf	nobs	Rsquare.of.Model.without.SNP	Rsquare.of.Model.with.SNP	effect	PVE(%)
Ca1pos7549977.1	1	7549977	8.54713e-05	0.139405	269	0.0206274	0.0794789	-1.0084	0.971838		Ca1pos2169207.1	1	2169207	2.86336e-05	0.0855019	269		0.0706771	1.00417	7.23145e-10		Ca1pos16180110.1	1	16180110	0.000160078	0.0929368	269	0.00357883	0.0587384	-0.181979	0		Ca1pos16180110.1		1	16180110	0.000160078	0.0929368	269	0.00357883	0.0587384	-0.181979	0
Ca1pos7664253.1	1	7664253	5.74124e-05	0.126394	269	0.0206274	0.0824391	-1.06381	9.8494e-10		Ca1pos5075618.1	1	5075618	7.66838e-05	0.0464684	269		0.0631741	-1.14101	0		Ca1pos18227074.1	1	18227074	4.05611e-05	0.249071	269	0.00357883	0.0691089	0.203613	0.405904		Ca1pos18227074.1		1	18227074	4.05611e-05	0.249071	269	0.00357883	0.0691089	0.203613	0.405904
Ca1pos7785076.1	1	7785076	6.26506e-05	0.0910781	269	0.0206274	0.0817882	1.21454	0.45451		Ca1pos5558883.1	1	5558883	3.46314e-05	0.0687732	269		0.0692214	-1.05078	0.145869		Ca1pos18227085.1	1	18227085	9.38143e-05	0.260223	269	0.00357883	0.0627523	0.195173	0.18045		Ca1pos18227085.1		1	18227085	9.38143e-05	0.260223	269	0.00357883	0.0627523	0.195173	0.18045
Ca2pos10733435.1	2	10733435	3.42716e-06	0.371747	269	0.0206274	0.103819	-0.817019	0.532865		Ca1pos5558888.1	1	5558888	8.1687e-05	0.0650558	269		0.0626959	1.01096	0.601549		Ca1pos45306211.1	1	45306211	1.42032e-05	0.414498	269	0.00357883	0.0771577	-0.112792	0.67123		Ca1pos45306211.1		1	45306211	1.42032e-05	0.414498	269	0.00357883	0.0771577	-0.112792	0.67123
Ca2pos29741594.1	2	29741594	7.21359e-05	0.098513	269	0.0206274	0.0807389	-1.3066	0		Ca1pos6024798.1	1	6024798	8.47404e-05	0.0650558	269		0.0624185	-1.05358	0		Ca2pos3709486.1	2	3709486	0.000121132	0.0669145	269	NA	0.127211	0.245096	0.435128		Ca2pos5631759.1		2	5631759	4.73796e-05	0.070632	269	0.00357883	0.0679258	0.245096	0.435128
Ca3pos433140.1	3	433140	8.16774e-05	0.431227	269	0.0206274	0.0798159	1.61958	0.0159909		Ca1pos6973546.1	1	6973546	4.29292e-05	0.0724907	269		0.0675814	1.09224	2.54445e-05		Ca3pos9066508.1	3	9066508	8.7526e-05	0.247212	269	0.00357883	0.0632756	-0.194066	0.507556		Ca3pos9066508.1		3	9066508	8.7526e-05	0.247212	269	0.00357883	0.0632756	-0.194066	0.507556
Ca4pos4652765.1	4	4652765	8.91495e-05	0.107807	269	0.0206274	0.0791664	-1.35261	0		Ca1pos6973547.1	1	6973547	2.59412e-05	0.070632	269		0.0714343	1.13742	0		Ca4pos37409651.1	4	37409651	5.00388e-05	0.126394	269	0.00357883	0.0675105	0.191074	0.00887856		Ca4pos37409651.1		4	37409651	5.00388e-05	0.126394	269	0.00357883	0.0675105	0.191074	0.00887856
Ca4pos17072042.1	4	17072042	4.06699e-05	0.351301	269	0.0206274	0.0850161	1.31484	0.301021		Ca1pos7009144.1	1	7009144	1.0231e-05	0.0724907	269		0.0786121	-1.13169	0		Ca4pos37748343.1	4	37748343	8.0536e-05	0.100372	269	0.00357883	0.063904	0.194967	0.2582		Ca4pos37748343.1		4	37748343	8.0536e-05	0.100372	269	0.00357883	0.063904	0.194967	0.2582
Ca4pos31831323.1	4	31831323	2.00805e-05	0.0576208	269	0.0206274	0.0903257	-2.02072	0		Ca1pos22495709.1	1	22495709	4.25476e-05	0.327138	269		0.0676495	0.868691	0.0746441		Ca5pos2415075.1	5	2415075	1.52085e-05	0.0780669	269	0.00357883	0.0766301	-0.266764	1.10922		Ca5pos2415075.1		5	2415075	1.52085e-05	0.0780669	269	0.00357883	0.0766301	-0.266764	1.10922
Ca4pos35866255.1	4	35866255	7.2182e-05	0.475836	269	0.0206274	0.0807342	2.65126	0.159881		Ca3pos428180.1	3	428180	3.40891e-05	0.459108	269		0.069342	-1.07466	8.41298e-09		Ca5pos19380673.1	5	19380673	0.000148742	0.420074	269	0.00357883	0.0592883	-0.244408	0.0385909		Ca5pos19380673.1		5	19380673	0.000148742	0.420074	269	0.00357883	0.0592883	-0.244408	0.0385909
Ca4pos40767990.1	4	40767990	4.35096e-05	0.204461	269	0.0206274	0.0845108	0.87144	3.59717e-09		Ca3pos37940720.1	3	37940720	4.63634e-05	0.0650558	269		0.0669949	1.07037	0.362469		Ca5pos19380749.1	5	19380749	0.000134579	0.027881	269	0.00357883	0.0600384	0.413195	1.70987		Ca5pos19380749.1		5	19380749	0.000134579	0.027881	269	0.00357883	0.0600384	0.413195	1.70987
Ca5pos3880897.1	5	3880897	7.75264e-05	0.0408922	269	0.0206274	0.0802033	-2.06295	2.97885e-09		Ca4pos13905683.1	4	13905683	3.922e-05	0.187732	269		0.0682708	0.60697	0.227717		Ca5pos30905240.1	5	30905240	8.34204e-05	0.0520446	269	0.00357883	0.0636382	0.25332	0.189138		Ca5pos30905240.1		5	30905240	8.34204e-05	0.0520446	269	0.00357883	0.0636382	0.25332	0.189138
Ca5pos4250080.1	5	4250080	5.5342e-05	0.265799	269	0.0206274	0.0827131	-1.14638	0.174349		Ca4pos28662892.1	4	28662892	6.50965e-05	0.356877	269		0.0644153	0.895946	0.847702		Ca5pos32342319.1	5	32342319	4.97245e-05	0.0724907	269	0.00357883	0.0675584	-0.281074	0.21008		Ca5pos32342319.1		5	32342319	4.97245e-05	0.0724907	269	0.00357883	0.0675584	-0.281074	0.21008
Ca5pos4955994.1	5	4955994	1.24472e-05	0.180297	269	0.0206274	0.0939492	-1.28397	0.040378		Ca4pos28662905.1	4	28662905	7.69604e-05	0.358736	269		0.0631468	0.892372	1.66619e-09		Ca5pos44619069.1	5	44619069	0.000141724	0.0446097	269	0.00357883	0.0596505	0.262666	1.33127		Ca5pos44619069.1		5	44619069	0.000141724	0.0446097	269	0.00357883	0.0596505	0.262666	1.33127
Ca5pos25551837.1	5	25551837	7.37807e-05	0.0464684	269	0.0206274	0.0805713	-1.96783	0.423836		Ca4pos28662916.1	4	28662916	7.32152e-05	0.364312	269		0.0635245	0.903204	0.61741		Ca6pos42561399.1	6	42561399	0.000133527	0.245353	269	0.00357883	0.0600973	0.112512	1.07415		Ca6pos42561399.1		6	42561399	0.000133527	0.245353	269	0.00357883	0.0600973	0.112512	1.07415
Ca5pos25551845.1	5	25551845	6.01434e-05	0.0520446	269	0.0206274	0.0820926	-1.8939	1.37123e-08		Ca4pos32325961.1	4	32325961	2.3989e-05	0.288104	269		0.0720348	0.843924	4.89238e-08		Ca6pos46149195.1	6	46149195	0.000150001	0.126394	269	0.00357883	0.0592252	0.212671	0.31491		Ca6pos46149195.1		6	46149195	0.000150001	0.126394	269	0.00357883	0.0592252	0.212671	0.31491
Ca5pos25551846.1	5	25551846	6.01434e-05	0.0520446	269	0.0206274	0.0820926	-1.8939	0.263561		Ca4pos32325972.1	4	32325972	6.91664e-06	0.286245	269		0.0816553	0.903328	0		Ca7pos14155443.1	7	14155443	3.89148e-05	0.035316	269	0.00357883	0.0694247	0.391161	0.870368		Ca7pos14155443.1		7	14155443	3.89148e-05	0.035316	269	0.00357883	0.0694247	0.391161	0.870368
Ca5pos26181657.1	5	26181657	3.67576e-05	0.152416	269	0.0206274	0.0857743	-1.26781	0.352671		Ca4pos32325980.1	4	32325980	1.55293e-05	0.282528	269		0.0753831	0.862779	0		Ca7pos14155451.1	7	14155451	3.93264e-05	0.035316	269	0.00357883	0.0693445	0.391352	0.604663		Ca7pos14155451.1		7	14155451	3.93264e-05	0.035316	269	0.00357883	0.0693445	0.391352	0.604663
Ca6pos54083388.1	6	54083388	1.55106e-05	0.16171	269	0.0206274	0.0922797	0.857644	0.517847		Ca4pos32325996.1	4	32325996	1.42604e-06	0.241636	269		0.0940617	-0.939622	5.5129e-09		Ca7pos40493709.1	7	40493709	0.000142851	0.143123	269	0.00357883	0.0595911	0.206878	0		Ca7pos40493709.1		7	40493709	0.000142851	0.143123	269	0.00357883	0.0595911	0.206878	0
Ca7pos24504110.1	7	24504110	2.04986e-05	0.447955	269	0.0206274	0.09017	1.58761	0		Ca4pos32325998.1	4	32325998	4.43637e-06	0.243494	269		0.0851234	0.892938	0.64312		Ca7pos43474725.1	7	43474725	1.4573e-05	0.126394	269	0.00357883	0.0769593	0.243023	0.251507		Ca7pos43474725.1		7	43474725	1.4573e-05	0.126394	269	0.00357883	0.0769593	0.243023	0.251507
																																	Ca7pos43474725.1		7	43474725	1.4573e-05	0.126394	269	0.00357883	0.0769593	0.243023	0.251507

## Sheet: Sheet2
	Supplementary Table 3 : List of the MTAs identified for RDW for association panel
			BLINK
	Location 1									Location 2									LOCATION 3
	SNP	Chromosome	Position	P.value	maf	nobs	effect	PVE(%)		SNP	Chromosome	Position	P.value	maf	nobs	effect	PVE(%)		SNP	Chromosome	Position	P.value	maf	nobs	effect	PVE(%)
	Ca1pos5437778.1	1	5437778	2.31071e-05	0.154275	269	NA	2.90647		Ca1pos22774295.1	1	22774295	9.81743e-05	0.0947955	269	NA	0		Ca1pos29716140.1	1	29716140	7.49594e-05	0.0557621	269	NA	0
	Ca1pos45343404.1	1	45343404	6.21697e-08	0.498141	269	NA	0.742224		Ca2pos12392333.1	2	12392333	0.000154722	0.0408922	269	NA	0		Ca1pos34151789.1	1	34151789	7.21516e-05	0.0576208	269	NA	0.382052
	Ca2pos23927240.1	2	23927240	1.59502e-05	0.490706	269	NA	2.02609e-09		Ca2pos12392340.1	2	12392340	0.000154722	0.0408922	269	NA	0		Ca2pos6782492.1	2	6782492	7.8992e-06	0.113383	269	NA	0.174867
	Ca3pos6371941.1	3	6371941	2.26756e-06	0.488848	269	NA	0.074614		Ca2pos19101628.1	2	19101628	0.000151049	0.0836431	269	NA	0.0687392		Ca2pos6782498.1	2	6782498	6.10384e-05	0.105948	269	NA	27.2364
	Ca3pos11126450.1	3	11126450	1.50402e-08	0.317844	269	NA	0.0754439		Ca2pos25615352.1	2	25615352	4.02029e-06	0.0892193	269	NA	0.969021		Ca3pos4411768.1	3	4411768	4.13216e-05	0.189591	269	NA	0.248104
	Ca3pos12717278.1	3	12717278	1.46289e-05	0.063197	269	NA	0.102402		Ca2pos32084939.1	2	32084939	0.00028872	0.118959	269	NA	1.0176		Ca4pos20267143.1	4	20267143	4.21976e-06	0.174721	269	NA	0.367128
	Ca3pos19386833.1	3	19386833	2.75858e-05	0.386617	269	NA	0.324507		Ca3pos6973254.1	3	6973254	0.000239889	0.351301	269	NA	0.631815		Ca5pos15891425.1	5	15891425	1.80975e-05	0.0817844	269	NA	1.44697e-08
	Ca3pos20041209.1	3	20041209	2.46981e-05	0.0817844	269	NA	0		Ca3pos12202489.1	3	12202489	8.62772e-05	0.362454	269	NA	0.903907		Ca5pos17470070.1	5	17470070	3.78742e-05	0.0576208	269	NA	0.0708631
	Ca5pos43920530.1	5	43920530	2.51906e-05	0.498141	269	NA	0.0588708		Ca4pos15343579.1	4	15343579	0.000258677	0.128253	269	NA	0.0750061		Ca6pos11308748.1	6	11308748	4.67879e-06	0.163569	269	NA	6.30124e-08
	Ca5pos6973254.1	5	44544897	9.92334e-09	0.063197	269	NA	2.34726		Ca4pos15343583.1	4	15343583	0.000192194	0.128253	269	NA	0.809215		Ca6pos34164117.1	6	34164117	2.87419e-06	0.416357	269	NA	3.50499e-08
	Ca6pos3395617.1	6	3395617	9.05787e-06	0.351301	269	NA	0.64893		Ca4pos25705446.1	4	25705446	0.000276744	0.342007	269	NA	0.0859524		Ca6pos38012786.1	6	38012786	6.53715e-05	0.126394	269	NA	0.514694
	Ca6pos3395620.1	6	3395620	9.05787e-06	0.351301	269	NA	0.122569		Ca4pos25784728.1	4	25784728	0.000247769	0.343866	269	NA	0.227032		Ca7pos19898936.1	7	19898936	6.15514e-05	0.0947955	269	NA	0.244824
	Ca6pos48064253.1	6	48064253	1.17299e-27	0.498141	269	NA	0.0114947		Ca4pos28363567.1	4	28363567	0.000307695	0.35316	269	NA	0.388386		Ca7pos22479704.1	7	22479704	1.47246e-05	0.247212	269	NA	0.204414
	Ca6pos53010526.1	6	53010526	1.41601e-05	0.5	269	NA	70.3745		Ca5pos19702624.1	5	19702624	0.000264618	0.256506	269	NA	0.026134		Ca7pos22479707.1	7	22479707	1.46719e-05	0.130112	269	NA	0.643372
	Ca7pos9203921.1	7	9203921	2.51906e-05	0.498141	269	NA	0.000108973		Ca6pos2042099.1	6	2042099	0.000220398	0.0836431	269	NA	1.13933e-08		Ca7pos22479709.1	7	22479709	1.46719e-05	0.130112	269	NA	0.170688
	Ca7pos28335655.1	7	28335655	3.59352e-06	0.070632	269	NA	0.0918473		Ca6pos6411114.1	6	6411114	0.000220894	0.321561	269	NA	0.470145		Ca7pos22479713.1	7	22479713	6.97998e-06	0.133829	269	NA	0.022691
	Ca7pos40986424.1	7	40986424	2.51906e-05	0.498141	269	NA	0.525705		Ca7pos36848902.1	7	36848902	0.000230925	0.163569	269	NA	0.602621		Ca7pos22479723.1	7	22479723	3.90911e-05	0.143123	269	NA	1.62661e-07
	Ca8pos7478798.1	8	7478798	7.38077e-06	0.0613383	269	NA	2.70226		Ca7pos37949112.1	7	37949112	0.000279626	0.0799257	269	NA	1.22003		Ca7pos38101654.1	7	38101654	3.68927e-05	0.319703	269	NA	0.298459
	Ca8pos10380864.1	8	10380864	4.03622e-06	0.498141	269	NA	0.110472		Ca7pos45292200.1	7	45292200	0.000157692	0.0817844	269	NA	0.011036		Ca7pos45379870.1	7	45379870	2.92205e-05	0.141264	269	NA	0.777461
	Ca8pos10887378.1	8	10887378	2.51906e-05	0.498141	269	NA	5.93141		Ca8pos16111129.1	8	16111129	0.000217355	0.10223	269	NA	0.715747		Ca8pos7777575.1	8	7777575	4.0313e-05	0.490706	269	NA	0.906667
	FarmCPU									FarmCPU
	Location 1									Location 2									LOCATION 3
	SNP	Chromosome	Position	P.value	maf	nobs	effect	PVE(%)		SNP	Chromosome	Position	P.value	maf	nobs	effect	PVE(%)		SNP	Chromosome	Position	P.value	maf	nobs	effect	PVE(%)
	Ca1pos6291028.1	1	6291028	2.29808e-07	0.498141	269	0.458297	1.3789		Ca1pos22774295.1	1	22774295	9.83454e-05	0.0947955	269	0.671471	0		Ca1pos2041500.1	1	2041500	2.5868e-11	0.0947955	269	0.743778	1.02976
	Ca1pos37038584.1	1	37038584	3.19328e-09	0.130112	269	0.883011	0.377997		Ca2pos12392333.1	2	12392333	0.000154979	0.0408922	269	-0.968107	0		Ca3pos3535598.1	3	3535598	6.07e-06	0.122677	269	-0.44338	2.0409
	Ca1pos45343404.1	1	45343404	2.33214e-10	0.498141	269	-6.77305	0.491746		Ca2pos12392340.1	2	12392340	0.000154979	0.0408922	269	-0.968107	0		Ca3pos10170609.1	3	10170609	2.99223e-06	0.0799257	269	-0.498652	0.349676
	Ca2pos29745185.1	2	29745185	8.38059e-06	0.362454	269	0.626049	0.0616777		Ca2pos19101628.1	2	19101628	0.0001513	0.0836431	269	-0.537916	0.0687392		Ca3pos15212414.1	3	15212414	5.94373e-05	0.0743494	269	-0.493798	0.30984
	Ca3pos6371941.1	3	6371941	2.16287e-05	0.488848	269	1.46857	0.643926		Ca2pos25615352.1	2	25615352	4.02973e-06	0.0892193	269	-0.82645	0.969021		Ca3pos26074543.1	3	26074543	5.85315e-06	0.356877	269	0.39668	0.207464
	Ca3pos12717278.1	3	12717278	4.438e-07	0.063197	269	-0.93455	0.157378		Ca2pos32084939.1	2	32084939	0.000289165	0.118959	269	-0.485477	1.0176		Ca3pos37003045.1	3	37003045	2.37616e-07	0.0539033	269	0.553154	0.437762
	Ca4pos23540463.1	4	23540463	1.21017e-05	0.0557621	269	0.671578	0.28365		Ca3pos6973254.1	3	6973254	0.000240266	0.351301	269	0.559286	0.631815		Ca4pos15204531.1	4	15204531	5.28313e-05	0.0799257	269	-0.455162	9.60108
	Ca4pos36998683.1	4	36998683	3.3335e-05	0.113383	269	-0.70812	2.48175		Ca3pos12202489.1	3	12202489	8.64298e-05	0.362454	269	0.614776	0.903907		Ca4pos23421922.1	4	23421922	5.59424e-08	0.105948	269	0.544081	0.648052
	Ca5pos17239464.1	5	17239464	3.09209e-05	0.288104	269	0.597712	0.344674		Ca4pos15343579.1	4	15343579	0.00025908	0.128253	269	-0.585254	0.0750061		Ca4pos37179013.1	4	37179013	2.02214e-05	0.152416	269	-0.293711	0.208846
	Ca5pos44737977.1	5	44737977	1.16006e-11	0.115242	269	1.04612	0.119654		Ca4pos15343583.1	4	15343583	0.000192505	0.128253	269	-0.598663	0.809215		Ca4pos42120377.1	4	42120377	3.06175e-07	0.498141	269	-4.36373	0.122289
	Ca6pos126118.1	6	126118	3.25815e-05	0.100372	269	-0.781381	0.0469694		Ca4pos25705446.1	4	25705446	0.000277172	0.342007	269	0.457835	0.0859524		Ca5pos15891425.1	5	15891425	4.0916e-05	0.0817844	269	0.433055	0.441255
	Ca6pos126124.1	6	126124	2.21665e-05	0.182156	269	-0.428415	0.147999		Ca4pos25784728.1	4	25784728	0.000248157	0.343866	269	0.488901	0.227032		Ca5pos26510168.1	5	26510168	3.16751e-05	0.0817844	269	0.524509	0.180714
	Ca6pos30827329.1	6	30827329	1.19798e-07	0.0520446	269	-0.995886	0.0572747		Ca4pos28363567.1	4	28363567	0.000308166	0.35316	269	0.272105	0.388386		Ca5pos29928205.1	5	29928205	5.86913e-05	0.070632	269	0.40348	0.464629
	Ca6pos37849860.1	6	37849860	1.85022e-06	0.135688	269	0.646161	67.3833		Ca5pos19702624.1	5	19702624	0.00026503	0.256506	269	0.506026	0.026134		Ca6pos11308748.1	6	11308748	7.19195e-08	0.163569	269	-0.478744	51.5909
	Ca6pos46797130.1	6	46797130	2.97623e-05	0.239777	269	0.589305	0.108311		Ca6pos2042099.1	6	2042099	0.000220749	0.0836431	269	-0.654423	1.13933e-08		Ca6pos34164117.1	6	34164117	4.31891e-11	0.416357	269	-0.696929	0.576284
	Ca6pos48064253.1	6	48064253	3.44499e-18	0.498141	269	-14.451	0.00912704		Ca6pos6411114.1	6	6411114	0.000221245	0.321561	269	0.53704	0.470145		Ca6pos42170481.1	6	42170481	4.70693e-05	0.256506	269	-0.360393	0.295621
	Ca7pos21730669.1	7	21730669	3.41265e-05	0.488848	269	1.56914	0.018689		Ca7pos36848902.1	7	36848902	0.000231291	0.163569	269	0.582768	0.602621		Ca7pos39077117.1	7	39077117	6.63764e-05	0.128253	269	-0.40417	0.45737
	Ca7pos22479713.1	7	22479713	2.08492e-05	0.133829	269	0.691739	0.0292026		Ca7pos37949112.1	7	37949112	0.000280058	0.0799257	269	0.69961	1.22003		Ca7pos39302388.1	7	39302388	7.59972e-08	0.0539033	269	-0.599666	0.294256
	Ca8pos11994085.1	8	11994085	7.89253e-07	0.157993	269	0.654681	14.6698		Ca7pos45292200.1	7	45292200	0.000157953	0.0817844	269	-0.63	0.011036		Ca7pos45379870.1	7	45379870	5.8794e-09	0.141264	269	0.546132	0.591663
	Ca8pos14046096.1	8	14046096	3.62e-05	0.0724907	269	0.813817	0.253376		Ca8pos16111129.1	8	16111129	0.000217701	0.10223	269	-0.69523	0.715747		Ca8pos7777575.1	8	7777575	7.20039e-12	0.490706	269	-2.42242	0.89882
	MLM									MLM
	Location 1									Location 2
	SNP	Chromosome	Position	P.value	maf	nobs	effect	PVE(%)		SNP	Chromosome	Position	P.value	maf	nobs	effect	PVE(%)
	Ca1pos29680366.1	1	29680366	2.58391e-05	0.0929368	269	1.40532	0		Ca1pos43715427.1	1	43715427	0.00010456	0.13197	269	-0.57409	0.00966403
	Ca1pos44832263.1	1	44832263	1.29114e-05	0.0297398	269	1.86241	0.128716		Ca1pos44768658.1	1	44768658	5.01165e-05	0.223048	269	0.523893	0.022533
	Ca1pos45343404.1	1	45343404	2.97118e-05	0.498141	269	-8.93309	1.19757e-08		Ca2pos12392333.1	2	12392333	8.61038e-05	0.0408922	269	-0.931645	0.70303
	Ca3pos6371941.1	3	6371941	7.89378e-06	0.488848	269	3.09607	0.210885		Ca2pos12392340.1	2	12392340	8.61038e-05	0.0408922	269	-0.931645	0.0109606
	Ca3pos8680814.1	3	8680814	1.30782e-06	0.0613383	269	1.57339	0.192033		Ca2pos19101628.1	2	19101628	4.98826e-05	0.0836431	269	-0.537703	0.0821838
	Ca3pos8941919.1	3	8941919	7.4573e-06	0.490706	269	-3.25451	0		Ca2pos25615352.1	2	25615352	6.69025e-05	0.0892193	269	-0.66516	0
	Ca3pos10568692.1	3	10568692	2.69886e-05	0.0687732	269	-1.35675	0.0505769		Ca2pos36360281.1	2	36360281	0.000116474	0.0650558	269	-0.678392	0.313258
	Ca3pos23494444.1	3	23494444	4.38498e-06	0.0799257	269	1.50367	0		Ca3pos6307908.1	3	6307908	0.000155564	0.0947955	269	0.593036	0.317217
	Ca4pos15470560.1	4	15470560	1.94775e-05	0.0464684	269	1.7043	0.252754		Ca3pos6973254.1	3	6973254	6.70861e-05	0.351301	269	0.55389	1.56651
	Ca5pos6914534.1	5	6914534	3.26932e-07	0.490706	269	-4.19235	5.7296		Ca3pos12202489.1	3	12202489	5.69425e-05	0.362454	269	0.582286	0.289624
	Ca6pos1492423.1	6	1492423	9.00004e-08	0.496283	269	-8.21288	0		Ca3pos20256406.1	3	20256406	0.000169584	0.364312	269	0.532816	0
	Ca6pos1492432.1	6	1492432	3.04929e-05	0.494424	269	-5.12693	25.977		Ca3pos25741747.1	3	25741747	9.45577e-05	0.386617	269	0.599483	0.132421
	Ca6pos1492443.1	6	1492443	3.68063e-05	0.0185874	269	-1.98261	0.0107039		Ca4pos33796975.1	4	33796975	0.000131941	0.0446097	269	-0.885991	0.4027
	Ca6pos1683033.1	6	1683033	2.52102e-06	0.494424	269	-5.83086	4.16015e-08		Ca4pos47562763.1	4	47562763	0.000133339	0.070632	269	0.601063	0.628406
	Ca6pos33228569.1	6	33228569	7.06036e-09	0.5	269	8.92813	0		Ca5pos2919972.1	5	2919972	8.20071e-05	0.29368	269	-0.504729	0.367336
	Ca6pos45835811.1	6	45835811	4.90909e-05	0.0947955	269	1.35299	1.78303e-08		Ca5pos24271374.1	5	24271374	0.000171724	0.124535	269	-0.563964	1.42559
	Ca7pos1020683.1	7	1020683	1.93258e-05	0.451673	269	1.48735	1.51892e-08		Ca5pos24764942.1	5	24764942	7.14093e-05	0.0539033	269	0.810303	0.236681
	Ca7pos32282240.1	7	32282240	3.07465e-05	0.0557621	269	-1.44977	1.0583e-06		Ca5pos43464218.1	5	43464218	0.000188192	0.10223	269	0.491302	0.970072
	Ca7pos43464144.1	7	43464144	4.06389e-05	0.0539033	269	1.72968	0		Ca6pos3156765.1	6	3156765	6.15761e-05	0.223048	269	-0.506153	0.109171
	Ca8pos14072648.1	8	14072648	2.97118e-05	0.498141	269	-8.93309	0.139234		Ca7pos44949791.1	7	44949791	0.000163984	0.204461	269	-0.35249	0

## Sheet: Sheet3
		Supplementary Table 4 : List of the MTAs identified for SFW for association panel
			Blink
	location 1									Location 2									Location 3									Location 4
	SNP	Chromosome	Position	P.value	maf	nobs	effect	PVE(%)		SNP	Chromosome	Position	P.value	maf	nobs	effect	PVE(%)		SNP	Chromosome	Position	P.value	maf	nobs	effect	PVE(%)		SNP	Chromosome	Position	P.value	maf	nobs	effect	PVE(%)
	Ca1pos2533483.1	1	2533483	2.22977e-06	0.0817844	269	NA	0.361486		Ca1pos2169207.1	1	2169207	2.15e-06	0.0855019	269	NA	0		Ca1pos6947698.1	1	6947698	0.00017449	0.122677	269	NA	0		Ca1pos15183977.1	1	15183977	0.000145214	0.14684	269	-5.47952	0.360762
	Ca1pos7595173.1	1	7595173	2.0522e-05	0.150558	269	NA	0.0347745		Ca1pos2169207.1	1	2474918	1.23e-06	0.0520446	269	NA	0.164881		Ca2pos7076410.1	2	7076410	0.000229928	0.150558	269	NA	1.03529		Ca1pos15183993.1	1	15183993	4.36887e-05	0.213755	269	-5.6027	1.0946e-08
	Ca1pos22554318.1	1	22554318	1.27567e-05	0.126394	269	NA	0.37459		Ca1pos2474918.1	1	40820287	1.69e-06	0.0669145	269	NA	1.57411		Ca2pos20647705.1	2	20647705	0.000119513	0.130112	269	NA	0		Ca1pos39133554.1	1	39133554	0.000224384	0.0873606	269	6.27936	0.704307
	Ca1pos22554344.1	1	22554344	3.4545e-05	0.189591	269	NA	4.69103e-07		Ca1pos40820287.1	3	37940720	3.46e-06	0.0650558	269	NA	0.194946		Ca2pos29060997.1	2	29060997	0.000169839	0.477695	269	NA	0.810544		Ca1pos48314880.1	1	48314880	0.000257839	0.0557621	269	-5.8207	0.251544
	Ca1pos23620309.1	1	23620309	1.13521e-05	0.0929368	269	NA	0		Ca3pos37940720.1	3	37990876	9.19e-06	0.109665	269	NA	1.45e-08		Ca3pos13147420.1	3	13147420	9.01296e-05	0.317844	269	NA	1.13848		Ca3pos2573705.1	3	2573705	4.50373e-05	0.421933	269	4.81889	0.55391
	Ca1pos23620313.1	1	23620313	6.08906e-06	0.0873606	269	NA	5.89774e-09		Ca3pos37990876.1	3	38008999	5.25e-06	0.0780669	269	NA	1.25e-07		Ca3pos37002847.1	3	37002847	0.000183063	0.0446097	269	NA	0.519838		Ca3pos15659075.1	3	15659075	3.20222e-05	0.1171	269	6.37596	0.285556
	Ca2pos33564927.1	2	33564927	3.31102e-05	0.0873606	269	NA	0.569563		Ca3pos38008999.1	3	38011962	7.69e-06	0.0669145	269	NA	0		Ca3pos37085799.1	3	37085799	0.000202113	0.0762082	269	NA	1.93657		Ca4pos29012189.1	4	29012189	0.000223678	0.197026	269	-4.52412	0.07455
	Ca3pos19954163.1	3	19954163	5.64272e-06	0.0557621	269	NA	6.15123e-10		Ca3pos38011962.1	3	38057183	7.54e-06	0.0762082	269	NA	0		Ca4pos26809768.1	4	26809768	0.000118652	0.486989	269	NA	0.248377		Ca4pos33103527.1	4	33103527	1.2191e-05	0.104089	269	6.37607	0.561328
	Ca5pos3210474.1	5	3210474	1.0743e-05	0.295539	269	NA	0		Ca3pos38057183.1	3	38057193	1.85e-06	0.0762082	269	NA	0		Ca4pos35901536.1	4	35901536	0.000188683	0.143123	269	NA	0.303575		Ca5pos17172498.1	5	17172498	0.000174049	0.0873606	269	-6.42627	4.17136e-08
	Ca5pos4955994.1	5	4955994	2.316e-05	0.180297	269	NA	1.56955		Ca3pos38057193.1	3	38057228	7.16e-06	0.0743494	269	NA	3.56e-09		Ca4pos40262803.1	4	40262803	0.000180886	0.135688	269	NA	0.26226		Ca5pos18203740.1	5	18203740	0.000177221	0.269517	269	-4.87159	0
	Ca5pos26997632.1	5	26997632	1.06604e-05	0.122677	269	NA	0.227401		Ca3pos38057228.1	3	38063432	8.3e-06	0.0892193	269	NA	0		Ca4pos42737237.1	4	42737237	7.39744e-05	0.1171	269	NA	0.151594		Ca5pos30905240.1	5	30905240	0.000202401	0.0520446	269	6.36694	1.57018e-06
	Ca6pos12932217.1	6	12932217	1.23112e-05	0.139405	269	NA	0.449499		Ca3pos38063432.1	3	38063441	4.21e-06	0.0966543	269	NA	0		Ca5pos4762721.1	5	4762721	0.000139364	0.126394	269	NA	0.781244		Ca5pos32717420.1	5	32717420	0.000177702	0.0743494	269	6.82948	0.859728
	Ca7pos37265216.1	7	37265216	2.0522e-05	0.027881	269	NA	1.37012		Ca3pos38063441.1	3	38068021	7.06e-06	0.0762082	269	NA	2.05e-09		Ca5pos19382235.1	5	19382235	0.000206974	0.33829	269	NA	1.62569e-07		Ca6pos15554514.1	6	15554514	2.20866e-05	0.16171	269	5.94745	0.168069
	Ca7pos37820266.1	7	37820266	1.0958e-05	0.0817844	269	NA	0.235598		Ca3pos38068021.1	3	38080272	4.01e-06	0.0743494	269	NA	4.28e-08		Ca5pos21673389.1	5	21673389	7.13395e-05	0.0464684	269	NA	0.270502		Ca6pos22124654.1	6	22124654	0.00021178	0.321561	269	-3.01659	0.40743
	Ca8pos742614.1	8	742614	2.18949e-05	0.0910781	269	NA	0.33362		Ca3pos38080272.1	3	38100180	2.29e-06	0.0687732	269	NA	0.0551204		Ca5pos21673392.1	5	21673392	0.000189646	0.0446097	269	NA	0.0722138		Ca6pos37384986.1	6	37384986	1.15545e-05	0.167286	269	-6.05416	0.155403
	Ca8pos752211.1	8	752211	8.38368e-06	0.070632	269	NA	0.336899		Ca3pos38100180.1	3	38100212	5.6e-06	0.0743494	269	NA	0.125801		Ca5pos23335706.1	5	23335706	0.000172493	0.325279	269	NA	0.27679		Ca6pos37384987.1	6	37384987	2.06194e-05	0.165428	269	-5.89591	0.450182
	Ca8pos752527.1	8	752527	1.98772e-05	0.0799257	269	NA	7.12848e-09		Ca3pos38100212.1	3	38106616	7.44e-06	0.0539033	269	NA	0.221523		Ca6pos50186682.1	6	50186682	0.000155583	0.275093	269	NA	0.375095		Ca6pos37385015.1	6	37385015	0.00014194	0.163569	269	-5.26617	0.690981
	Ca8pos761489.1	8	761489	3.23585e-06	0.0836431	269	NA	1.03846		Ca3pos38106616.1	3	38114728	7.45e-07	0.13197	269	NA	0.553037		Ca6pos57323751.1	6	57323751	4.68395e-05	0.133829	269	NA	0.270501		Ca6pos37385028.1	6	37385028	4.91568e-05	0.156134	269	-5.67476	0.0853751
	Ca8pos12033551.1	8	12033551	1.62467e-05	0.157993	269	NA	0.0871711		Ca3pos38114728.1	7	6667809	8.9e-06	0.0613383	269	NA	0.837472		Ca7pos23812822.1	7	23812822	0.000158119	0.128253	269	NA	0.0398658		Ca6pos39059747.1	6	39059747	0.000258275	0.388476	269	-5.55636	0
	Ca8pos15323219.1	8	15323219	3.03031e-05	0.0557621	269	NA	0.594437		Ca7pos6667809.1	7	46119789	4.42e-06	0.0799257	269	NA	0.786695		Ca7pos32970181.1	7	32970181	0.000205772	0.10223	269	NA	0.0949769		Ca8pos14157286.1	8	14157286	0.000207739	0.104089	269	-4.41976	0.329899
	FarmpCPU
	Location 1									Location 2									Location 3									location 4
	SNP	Chromosome	Position	P.value	maf	nobs	effect	PVE(%)		SNP	Chromosome	Position	P.value	maf	nobs	effect	PVE(%)		SNP	Chromosome	Position	P.value	maf	nobs	effect	PVE(%)		SNP	Chromosome	Position	P.value	maf	nobs	effect	PVE(%)
	Ca1pos2533483.1	1	2533483	2.23535e-06	0.0483271	269	-4.52374	0.361486		Ca1pos2169207.1	1	2169207	2.1577e-06	0.0855019	269	4.00906	0		Ca1pos6947698.1	1	6947698	0.000174676	0.122677	269	3.35127	0		Ca1pos33781183.1	1	33781183	3.26449e-05	0.0408922	269	9.00951	8.90573e-09
	Ca1pos7595173.1	1	7595173	3.40908e-05	0.150558	269	2.59225	0.0347745		Ca1pos2169232.1	1	2474918	1.23558e-06	0.0520446	269	-4.81411	0.164881		Ca2pos7076410.1	2	7076410	0.000230165	0.150558	269	3.30456	1.03529		Ca1pos35026875.1	1	35026875	4.30402e-05	0.386617	269	2.72877	3.70477e-07
	Ca1pos22554318.1	1	22554318	1.27843e-05	0.126394	269	3.4112	0.37459		Ca1pos2474918.1	1	40820287	1.6984e-06	0.0669145	269	-4.85218	1.57411		Ca2pos20647705.1	2	20647705	0.000119646	0.130112	269	-3.55381	0		Ca1pos39489126.1	1	39489126	1.89885e-05	0.154275	269	4.03746	0.746497
	Ca1pos22554344.1	1	22554344	3.46132e-05	0.189591	269	2.89517	4.69103e-07		Ca1pos2541034.1	3	37940720	3.46369e-06	0.0650558	269	4.20201	0.194946		Ca2pos29060997.1	2	29060997	0.000170021	0.477695	269	-5.64309	0.810544		Ca2pos10956074.1	2	10956074	2.51822e-05	0.178439	269	5.2355	2.2221e-08
	Ca1pos23620309.1	1	23620309	1.1377e-05	0.0929368	269	-3.92684	0		Ca1pos40820287.1	3	37990876	9.21105e-06	0.109665	269	3.39985	1.45148e-08		Ca3pos13147420.1	3	13147420	9.02328e-05	0.317844	269	3.26928	1.13848		Ca2pos13028720.1	2	13028720	2.64368e-05	0.0836431	269	6.70746	0.725492
	Ca1pos23620313.1	1	23620313	6.10313e-06	0.0873606	269	-4.13898	5.89774e-09		Ca3pos38000280.1	3	38008999	5.25924e-06	0.0780669	269	-3.68444	1.24815e-07		Ca3pos37002847.1	3	37002847	0.000183257	0.0446097	269	4.55645	0.519838		Ca3pos15659075.1	3	15659075	4.22246e-05	0.1171	269	5.72831	0.524245
	Ca2pos33564927.1	2	33564927	3.31758e-05	0.0873606	269	-3.04597	0.569563		Ca3pos38008999.1	3	38011962	7.70891e-06	0.0669145	269	-3.85945	0		Ca3pos37085799.1	3	37085799	0.000202324	0.0762082	269	-3.61038	1.93657		Ca4pos2720594.1	4	2720594	2.76357e-05	0.0966543	269	-5.42097	0.774755
	Ca3pos19954163.1	3	19954163	5.65584e-06	0.0557621	269	-4.37619	6.15123e-10		Ca3pos38034744.1	3	38057183	7.5614e-06	0.0762082	269	3.56348	0		Ca4pos26809768.1	4	26809768	0.000118783	0.486989	269	3.47375	0.248377		Ca4pos33103527.1	4	33103527	2.33389e-05	0.104089	269	5.89048	1.96816e-09
	Ca5pos3210474.1	5	3210474	1.07667e-05	0.295539	269	-3.13664	0		Ca3pos38057183.1	3	38057193	1.85299e-06	0.0762082	269	3.78557	0		Ca4pos35901536.1	4	35901536	0.000188882	0.143123	269	-3.36399	0.303575		Ca5pos1885988.1	5	1885988	1.63202e-05	0.152416	269	3.62679	0.542365
	Ca5pos4955994.1	5	4955994	2.32075e-05	0.180297	269	-2.98239	1.56955		Ca3pos38057193.1	3	38057228	7.17946e-06	0.0743494	269	-3.60629	3.55992e-09		Ca4pos40262803.1	4	40262803	0.000181077	0.135688	269	2.93731	0.26226		Ca5pos26199153.1	5	26199153	2.79181e-05	0.0576208	269	6.55957	0.392429
	Ca5pos26997632.1	5	26997632	1.06839e-05	0.122677	269	-2.3001	0.227401		Ca3pos38057228.1	3	38063432	8.32173e-06	0.0892193	269	-3.47873	0		Ca4pos42737237.1	4	42737237	7.40609e-05	0.1171	269	3.79681	0.151594		Ca5pos32717420.1	5	32717420	1.27283e-05	0.0743494	269	7.25228	0.19251
	Ca6pos12932217.1	6	12932217	1.2338e-05	0.139405	269	3.03738	0.449499		Ca3pos38063432.1	3	38063441	4.22398e-06	0.0966543	269	-3.50093	0		Ca5pos4762721.1	5	4762721	0.000139516	0.126394	269	-3.70934	0.781244		Ca6pos6232765.1	6	6232765	3.05235e-05	0.107807	269	4.40975	0
	Ca7pos37265216.1	7	37265216	2.05646e-05	0.027881	269	-6.29842	1.37012		Ca3pos38063441.1	3	38068021	7.07223e-06	0.0762082	269	3.63251	2.04528e-09		Ca5pos19382235.1	5	19382235	0.000207189	0.33829	269	3.20527	1.62569e-07		Ca6pos6981953.1	6	6981953	3.49565e-06	0.1171	269	-4.90967	2.11923e-08
	Ca7pos37820266.1	7	37820266	1.0982e-05	0.0817844	269	-4.16832	0.235598		Ca3pos38068021.1	3	38080272	4.01472e-06	0.0743494	269	3.77464	4.27859e-08		Ca5pos21673389.1	5	21673389	7.14232e-05	0.0464684	269	5.87265	0.270502		Ca6pos37384986.1	6	37384986	1.56721e-07	0.167286	269	-6.55316	5.81745e-08
	Ca8pos742614.1	8	742614	2.19401e-05	0.0910781	269	-3.09951	0.33362		Ca3pos38080272.1	3	38100180	2.29348e-06	0.0687732	269	3.9503	0.0551204		Ca5pos21673392.1	5	21673392	0.000189845	0.0446097	269	5.59734	0.0722138		Ca6pos37384987.1	6	37384987	3.43091e-07	0.165428	269	-6.40747	0.606042
	Ca8pos752211.1	8	752211	8.40252e-06	0.070632	269	-3.32605	0.336899		Ca3pos38100180.1	3	38100212	5.61128e-06	0.0743494	269	-3.71407	0.125801		Ca5pos23335706.1	5	23335706	0.000172677	0.325279	269	3.20593	0.27679		Ca6pos37385015.1	6	37385015	8.07374e-06	0.163569	269	-5.64101	1.00772
	Ca8pos752527.1	8	752527	1.99186e-05	0.0799257	269	3.23974	7.12848e-09		Ca3pos38100212.1	3	38106616	7.45547e-06	0.0539033	269	3.89789	0.221523		Ca6pos50186682.1	6	50186682	0.00015575	0.275093	269	-3.10329	0.375095		Ca6pos37385028.1	6	37385028	1.91191e-06	0.156134	269	-6.05886	0.488788
	Ca8pos761489.1	8	761489	3.24372e-06	0.0836431	269	3.44034	1.03846		Ca3pos38106616.1	3	38114728	7.47172e-07	0.13197	269	3.41144	0.553037		Ca6pos57323751.1	6	57323751	4.68969e-05	0.133829	269	2.98288	0.270501		Ca6pos45896143.1	6	45896143	2.56069e-05	0.098513	269	6.26976	0.278804
	Ca8pos12033551.1	8	12033551	1.62811e-05	0.157993	269	2.68249	0.0871711		Ca3pos38114728.1	7	6667809	8.92081e-06	0.0613383	269	-4.14047	0.837472		Ca7pos23812822.1	7	23812822	0.000158289	0.128253	269	-3.51787	0.0398658		Ca7pos41982831.1	7	41982831	2.7556e-05	0.126394	269	4.87529	0.335042
	Ca8pos15323219.1	8	15323219	3.03637e-05	0.0557621	269	-4.81039	0.594437		Ca7pos6667809.1	7	46119789	4.43471e-06	0.0799257	269	-4.37665	0.786695		Ca7pos32970181.1	7	32970181	0.000205986	0.10223	269	-3.44442	0.0949769		Ca8pos15702676.1	8	15702676	4.23815e-05	0.0687732	269	5.61936	1.12644
	MLM
	location 1									location 2									Location 3
	SNP	Chromosome	Position	P.value	maf	nobs	effect	PVE(%)		SNP	Chromosome	Position	P.value	maf	nobs	effect	PVE(%)		SNP	Chromosome	Position	P.value	maf	nobs	effect	PVE(%)		SNP	Chromosome	Position	P.value	maf	nobs	effect	PVE(%)
	Ca1pos299933.1	1	299933	6.49795e-05	0.0650558	269	-3.83019	0.948366		Ca1pos2169207.1	1	2169207	1.93e-05	0.0855019	269	3.49796	0.110789		Ca1pos15183977.1	1	15183977	0.000145214	0.14684	269	-5.47952	0.360762	1	Ca1pos15183977.1	1	15183977	0.000145214	0.14684	269	-5.47952	0.360762
	Ca1pos44968438.1	1	44968438	4.05353e-05	0.0892193	269	-3.443	0.863769		Ca1pos4701264.1	1	4701264	5.67e-05	0.070632	269	3.52313	0.790675		Ca1pos15183993.1	1	15183993	4.36887e-05	0.213755	269	-5.6027	1.0946e-08	2	Ca1pos15183993.1	1	15183993	4.36887e-05	0.213755	269	-5.6027	1.0946e-08
	Ca2pos275040.1	2	275040	7.13597e-05	0.0687732	269	-4.21606	6.43082		Ca1pos6747608.1	1	6747608	5.18e-05	0.0594796	269	-3.85475	0.964689		Ca1pos39133554.1	1	39133554	0.000224384	0.0873606	269	6.27936	0.704307	3	Ca1pos39133554.1	1	39133554	0.000224384	0.0873606	269	6.27936	0.704307
	Ca2pos15346480.1	2	15346480	8.50265e-05	0.159851	269	-3.10994	0.128697		Ca1pos6973546.1	1	6973546	5.24e-05	0.0724907	269	3.69836	1.2e-09		Ca1pos48314880.1	1	48314880	0.000257839	0.0557621	269	-5.8207	0.251544	4	Ca1pos48314880.1	1	48314880	0.000257839	0.0557621	269	-5.8207	0.251544
	Ca3pos13909436.1	3	13909436	6.40059e-05	0.45539	269	5.27076	0		Ca1pos6973547.1	1	6973547	3.11e-05	0.070632	269	3.85887	0		Ca3pos2573705.1	3	2573705	4.50373e-05	0.421933	269	4.81889	0.55391	5	Ca3pos2573705.1	3	2573705	4.50373e-05	0.421933	269	4.81889	0.55391
	Ca3pos19814188.1	3	19814188	5.6583e-05	0.063197	269	4.05773	0		Ca1pos7009144.1	1	7009144	7.38e-06	0.0724907	269	-3.91942	0.160498		Ca3pos15659075.1	3	15659075	3.20222e-05	0.1171	269	6.37596	0.285556	6	Ca3pos15659075.1	3	15659075	3.20222e-05	0.1171	269	6.37596	0.285556
	Ca3pos19993760.1	3	19993760	5.96384e-05	0.150558	269	-3.20738	0		Ca3pos37940720.1	3	37940720	3.94e-06	0.0650558	269	4.13756	2.53291		Ca4pos29012189.1	4	29012189	0.000223678	0.197026	269	-4.52412	0.07455	7	Ca4pos29012189.1	4	29012189	0.000223678	0.197026	269	-4.52412	0.07455
	Ca4pos4262386.1	4	4262386	7.38691e-05	0.109665	269	-3.45464	0.223272		Ca3pos38100180.1	3	38100180	5.7e-05	0.0687732	269	3.27692	0.274183		Ca4pos33103527.1	4	33103527	1.2191e-05	0.104089	269	6.37607	0.561328	8	Ca4pos33103527.1	4	33103527	1.2191e-05	0.104089	269	6.37607	0.561328
	Ca4pos34268028.1	4	34268028	9.40807e-05	0.0873606	269	-3.7449	5.61681e-10		Ca3pos38114728.1	3	38114728	4e-05	0.13197	269	2.77129	5.6e-10		Ca5pos17172498.1	5	17172498	0.000174049	0.0873606	269	-6.42627	4.17136e-08	9	Ca5pos17172498.1	5	17172498	0.000174049	0.0873606	269	-6.42627	4.17136e-08
	Ca5pos4077289.1	5	4077289	3.84211e-05	0.13197	269	-3.48244	0.263847		Ca4pos28662892.1	4	28662892	2.49e-05	0.356877	269	3.22993	7.38e-10		Ca5pos18203740.1	5	18203740	0.000177221	0.269517	269	-4.87159	0	10	Ca5pos18203740.1	5	18203740	0.000177221	0.269517	269	-4.87159	0
	Ca5pos4955994.1	5	4955994	1.42558e-05	0.180297	269	-3.30288	0.428359		Ca4pos28662905.1	4	28662905	1.11e-05	0.358736	269	3.39305	6.57e-09		Ca5pos30905240.1	5	30905240	0.000202401	0.0520446	269	6.36694	1.57018e-06	11	Ca5pos30905240.1	5	30905240	0.000202401	0.0520446	269	6.36694	1.57018e-06
	Ca5pos25438529.1	5	25438529	7.03306e-05	0.0947955	269	-3.33233	0.0847314		Ca4pos28662916.1	4	28662916	3.02e-05	0.364312	269	3.24068	0.0992998		Ca5pos32717420.1	5	32717420	0.000177702	0.0743494	269	6.82948	0.859728	12	Ca5pos32717420.1	5	32717420	0.000177702	0.0743494	269	6.82948	0.859728
	Ca5pos40335127.1	5	40335127	2.03448e-05	0.0929368	269	-4.06441	0.0838553		Ca4pos32325972.1	4	32325972	1.76e-05	0.286245	269	2.92095	1.77e-08		Ca6pos15554514.1	6	15554514	2.20866e-05	0.16171	269	5.94745	0.168069	13	Ca6pos15554514.1	6	15554514	2.20866e-05	0.16171	269	b	0.168069
	Ca6pos137666.1	6	137666	6.67391e-05	0.14684	269	3.24713	0.303572		Ca4pos32325980.1	4	32325980	5.88e-05	0.282528	269	2.71495	0.51778		Ca6pos22124654.1	6	22124654	0.00021178	0.321561	269	-3.01659	0.40743	14	Ca6pos22124654.1	6	22124654	0.00021178	0.321561	269	-3.01659	0.40743
	Ca6pos8475658.1	6	8475658	5.10496e-05	0.156134	269	-3.27376	0.193191		Ca4pos32325996.1	4	32325996	1.13e-05	0.241636	269	-2.89014	0.255272		Ca6pos37384986.1	6	37384986	1.15545e-05	0.167286	269	-6.05416	0.155403	15	Ca6pos37384986.1	6	37384986	1.15545e-05	0.167286	269	-6.05416	0.155403
	Ca6pos8723988.1	6	8723988	8.02054e-06	0.0743494	269	-4.65013	0.0473997		Ca4pos32325998.1	4	32325998	2.38e-05	0.243494	269	2.77864	3.28e-08		Ca6pos37384987.1	6	37384987	2.06194e-05	0.165428	269	-5.89591	0.450182	16	Ca6pos37384987.1	6	37384987	2.06194e-05	0.165428	269	-5.89591	0.450182
	Ca6pos23939605.1	6	23939605	4.24752e-05	0.0650558	269	3.91622	0		Ca6pos51763713.1	6	51763713	4.59e-05	0.0929368	269	3.03805	0.290651		Ca6pos37385015.1	6	37385015	0.00014194	0.163569	269	-5.26617	0.690981	17	Ca6pos37385015.1	6	37385015	0.00014194	0.163569	269	-5.26617	0.690981
	Ca6pos34568328.1	6	34568328	7.53576e-05	0.070632	269	-4.24728	0.137742		Ca7pos4213655.1	7	4213655	7.69e-07	0.0836431	269	-4.13769	3.47e-09		Ca6pos37385028.1	6	37385028	4.91568e-05	0.156134	269	-5.67476	0.0853751	18	Ca6pos37385028.1	6	37385028	4.91568e-05	0.156134	269	-5.67476	0.0853751
	Ca6pos48706890.1	6	48706890	5.94727e-05	0.202602	269	-3.06137	0.0806503		Ca7pos22955815.1	7	22955815	4.03e-05	0.0724907	269	-3.90583	0		Ca6pos39059747.1	6	39059747	0.000258275	0.388476	269	-5.55636	0	19	Ca6pos39059747.1	6	39059747	0.000258275	0.388476	269	-5.55636	0
	Ca8pos752527.1	8	752527	4.3813e-05	0.0799257	269	3.34486	0.361287		Ca7pos31652175.1	7	31652175	6.57e-05	0.33829	269	1.59845	8.22e-10		Ca8pos14157286.1	8	14157286	0.000207739	0.104089	269	-4.41976	0.329899	20	Ca8pos14157286.1	8	14157286	0.000207739	0.104089	269	-4.41976	0.329899

## Sheet: Sheet4
		Supplementary Table 5 : List of the MTAs identified for SDW for association panel
Blink
Location 1									Location 2									Location 3									Location 4
SNP	Chromosome	Position	P.value	maf	nobs	effect	PVE(%)		SNP	Chromosome	Position	P.value	maf	nobs	effect	PVE(%)		SNP	Chromosome	Position	P.value	maf	nobs	effect	PVE(%)		SNP	Chromosome	Position	P.value	maf	nobs	effect	PVE(%)
SNP	1	2169207	9.18153e-07	0.0855019	269	NA	0.00456649		Ca1pos2169207.1	1	2169207	9.18153e-07	0.0855019	269	NA	0.00456649		Ca1pos3209627.1	1	3209627	2.84932e-05	0.118959	269	NA	0.0228391		Ca1pos1378842.1	1	1378842	5.39214e-05	0.104089	269	0.927605	2.09767
Ca1pos4816891.1	1	2169232	3.56882e-06	0.0836431	269	NA	0.229348		Ca1pos2169232.1	1	2169232	3.56882e-06	0.0836431	269	NA	0.229348		Ca1pos6947698.1	1	6947698	6.80601e-06	0.122677	269	NA	0.0417717		Ca1pos3076296.1	1	3076296	2.81485e-05	0.178439	269	-0.783218	6.7777
Ca1pos6387546.1	1	2474918	3.92796e-07	0.0520446	269	NA	1.44394		Ca1pos2474918.1	1	2474918	3.92796e-07	0.0520446	269	NA	1.44394		Ca1pos42505460.1	1	42505460	1.55666e-05	0.174721	269	NA	6.12988		Ca1pos3105289.1	1	3105289	4.73074e-05	0.184015	269	-0.751678	1.50202
Ca1pos7463364.1	1	2541034	3.80004e-06	0.0483271	269	NA	1.83983e-07		Ca1pos2541034.1	1	2541034	3.80004e-06	0.0483271	269	NA	1.83983e-07		Ca1pos42505463.1	1	42505463	1.20869e-05	0.172862	269	NA	0.142356		Ca1pos37122468.1	1	37122468	2.90634e-05	0.494424	269	-4.7613	2.33014e-08
Ca1pos7463366.1	1	40820287	9.18051e-07	0.0669145	269	NA	0		Ca1pos40820287.1	1	40820287	9.18051e-07	0.0669145	269	NA	0		Ca1pos46282767.1	1	46282767	2.25392e-05	0.0297398	269	NA	0.23987		Ca1pos39647846.1	1	39647846	1.5405e-05	0.143123	269	1.14979	5.74881e-09
Ca2pos18373622.1	3	38000280	4.43006e-06	0.0762082	269	NA	0		Ca3pos38000280.1	3	38000280	4.43006e-06	0.0762082	269	NA	0		Ca3pos3580135.1	3	3580135	1.17828e-05	0.0315985	269	NA	0		Ca2pos28823139.1	2	28823139	4.73415e-05	0.0483271	269	-1.39877	0.973873
Ca2pos23719723.1	3	38008999	2.5243e-06	0.0780669	269	NA	0		Ca3pos38008999.1	3	38008999	2.5243e-06	0.0780669	269	NA	0		Ca3pos6117690.1	3	6117690	3.48911e-05	0.0669145	269	NA	0		Ca3pos19707707.1	3	19707707	3.92686e-05	0.180297	269	0.650186	0.578064
Ca2pos24613117.1	3	38034744	3.63782e-06	0.0966543	269	NA	7.39167e-09		Capso.138034744	3	38034744	3.63782e-06	0.0966543	269	NA	7.39167e-09		Ca3pos13852265.1	3	13852265	2.37813e-05	0.0687732	269	NA	0		Ca3pos25805689.1	3	25805689	6.08794e-05	0.286245	269	0.972637	0
Ca2pos29170648.1	3	38057183	3.89814e-06	0.0762082	269	NA	0.0014944		Ca3pos38057183.1	3	38057183	3.89814e-06	0.0762082	269	NA	0.0014944		Ca3pos16106751.1	3	16106751	3.2124e-05	0.0223048	269	NA	0.360265		Ca3pos25805690.1	3	25805690	6.08794e-05	0.286245	269	0.972637	6.25802e-09
Ca2pos35009175.1	3	38057193	9.14853e-07	0.0762082	269	NA	8.99019e-09		Ca3pos38057193.1	3	38057193	9.14853e-07	0.0762082	269	NA	8.99019e-09		Ca4pos36235387.1	4	36235387	2.1606e-05	0.0520446	269	NA	0.287253		Ca4pos32772485.1	4	32772485	2.04399e-05	0.498141	269	-8.35036	0.332071
Ca2pos35413230.1	3	38057228	4.06776e-06	0.0743494	269	NA	0		Ca3pos38057228.1	3	38057228	4.06776e-06	0.0743494	269	NA	0		Ca4pos42120377.1	4	42120377	2.83822e-11	0.498141	269	NA	0.0274232		Ca5pos33032029.1	5	33032029	3.78539e-05	0.0464684	269	-1.37023	0.406088
Ca4pos17341878.1	3	38063432	3.02198e-06	0.0892193	269	NA	4.82009e-08		Ca3pos38063432.1	3	38063432	3.02198e-06	0.0892193	269	NA	4.82009e-08		Ca5pos2948345.1	5	2948345	2.39303e-05	0.105948	269	NA	0.0761401		Ca5pos41523197.1	5	41523197	6.73651e-05	0.035316	269	-1.4437	6.95039
Ca4pos24997998.1	3	38063441	1.82812e-06	0.0966543	269	NA	1.68357e-07		Ca3pos38063441.1	3	38063441	1.82812e-06	0.0966543	269	NA	1.68357e-07		Ca5pos11407311.1	5	11407311	2.9798e-05	0.120818	269	NA	0.21878		Ca5pos42012947.1	5	42012947	3.51975e-05	0.0799257	269	1.14842	2.70398
Ca5pos9396198.1	3	38068021	3.41232e-06	0.0762082	269	NA	1.56751e-07		Ca3pos38068021.1	3	38068021	3.41232e-06	0.0762082	269	NA	1.56751e-07		Ca6pos41852142.1	6	41852142	8.28876e-06	0.0464684	269	NA	6.83638		Ca5pos42074441.1	5	4.20744e+07	1.15919e-05	0.0557621	269	1.39919	0.0500729
Ca5pos9396203.1	3	38080272	2.02447e-06	0.0743494	269	NA	2.08251e-09		Ca3pos38080272.1	3	38080272	2.02447e-06	0.0743494	269	NA	2.08251e-09		Ca7pos45151523.1	7	45151523	1.548e-06	0.490706	269	NA	0.438862		Ca5pos42272729.1	5	42272729	2.08582e-05	0.0576208	269	1.33688	0.849343
Ca5pos9396206.1	3	38100180	9.95483e-07	0.0687732	269	NA	7.49477e-10		Ca3pos38100180.1	3	38100180	9.95483e-07	0.0687732	269	NA	7.49477e-10		Ca7pos47827265.1	7	47827265	2.10423e-05	0.0966543	269	NA	0.183222		Ca6pos14512673.1	6	14512673	2.23162e-05	0.0594796	269	1.61824	1.78936
Ca6pos39853527.1	3	38100212	3.89093e-06	0.0743494	269	NA	0.320031		Ca3pos38100212.1	3	38100212	3.89093e-06	0.0743494	269	NA	0.320031		Ca7pos47827274.1	7	47827274	1.32485e-05	0.098513	269	NA	55.5164		Ca6pos27009414.1	6	27009414	5.12228e-05	0.304833	269	0.964097	0.015126
Ca6pos41992887.1	3	38106616	3.90868e-06	0.0539033	269	NA	3.81922e-08		Ca3pos38106616.1	3	38106616	3.90868e-06	0.0539033	269	NA	3.81922e-08		Ca8pos10367521.1	8	10367521	2.78201e-05	0.498141	269	NA	0.448021		Ca7pos15917660.1	7	15917660	2.38641e-05	0.0724907	269	1.43451	0.0487045
Ca6pos46985254.1	3	38114728	3.72525e-07	0.13197	269	NA	0.620491		Ca3pos38114728.1	3	38114728	3.72525e-07	0.13197	269	NA	0.620491		Ca8pos11135138.1	8	11135138	1.65874e-05	0.107807	269	NA	0.0268164		Ca7pos30666345.1	7	30666345	2.04399e-05	0.498141	269	-8.35036	0.246857
Ca7pos25427142.1	7	6667809	3.99953e-06	0.0613383	269	NA	1.11459		Ca7pos6667809.1	7	6667809	3.99953e-06	0.0613383	269	NA	1.11459		Ca8pos14444831.1	8	14444831	7.54074e-06	0.200743	269	NA	9.6605e-07		Ca8pos12985289.1	8	12985289	4.31642e-05	0.496283	269	-5.67281	3.09465e-07
Ca8pos15057733.1
FarmCPU
location 1									Location 2									Location 3									Location 4
SNP	Chromosome	Position	P.value	maf	nobs	effect	PVE(%)		SNP	Chromosome	Position	P.value	maf	nobs	effect	PVE(%)		SNP	Chromosome	Position	P.value	maf	nobs	effect	PVE(%)		SNP	Chromosome	Position	P.value	maf	nobs	effect	PVE(%)
Ca1pos4816891.1	1	2169207	9.2007e-07	0.0855019	269	1.58695	0.00456649		Ca1pos2169207.1	1	2169207	9.2e-07	0.0855019	269	1.58695	0.00456649		Ca1pos1944538.1	1	1944538	1.38861e-07	0.275093	269	-2.27388	0.498881		Ca1pos1378842.1	1	1378842	1.01867e-05	0.104089	269	0.961219	0.167663
Ca1pos6387546.1	1	2169232	3.57555e-06	0.0836431	269	1.5371	0.229348		Ca1pos2169232.1	1	2169232	3.58e-06	0.0836431	269	1.5371	0.229348		Ca1pos6947698.1	1	6947698	8.38606e-14	0.122677	269	3.25238	0.0968205		Ca1pos14326886.1	1	14326886	1.7397e-06	0.105948	269	-1.14386	1.71043
Ca1pos7463364.1	1	2474918	3.93666e-07	0.0520446	269	-1.92289	1.44394		Ca1pos2474918.1	1	2474918	3.94e-07	0.0520446	269	-1.92289	1.44394		Ca1pos36661275.1	1	36661275	2.34779e-05	0.120818	269	1.68517	0.752748		Ca1pos22131740.1	1	22131740	6.24865e-06	0.498141	269	-8.35037	0
Ca1pos7463366.1	1	2541034	3.80716e-06	0.0483271	269	1.78497	1.83983e-07		Ca1pos2541034.1	1	2541034	3.81e-06	0.0483271	269	1.78497	1.84e-07		Ca1pos42505463.1	1	42505463	1.31785e-05	0.172862	269	1.15364	0.126268		Ca1pos22131743.1	1	22131743	6.24865e-06	0.498141	269	-8.35037	1.45682
Ca2pos18373622.1	1	40820287	9.19968e-07	0.0669145	269	-1.90237	0		Ca1pos40820287.1	1	40820287	9.2e-07	0.0669145	269	-1.90237	0		Ca2pos16252263.1	2	16252263	1.33847e-05	0.306691	269	-1.92037	0.416111		Ca4pos4696001.1	4	4696001	7.64685e-06	0.0873606	269	1.36328	0.528924
Ca2pos23719723.1	3	38000280	4.43826e-06	0.0762082	269	1.38355	0		Ca3pos38000280.1	3	38000280	4.44e-06	0.0762082	269	1.38355	0		Ca2pos17231245.1	2	17231245	1.52676e-05	0.0483271	269	-3.23069	0.0816135		Ca4pos4749506.1	4	4749506	3.13534e-06	0.0892193	269	-1.36368	6.66092e-07
Ca2pos24613117.1	3	38008999	2.52918e-06	0.0780669	269	-1.45496	0		Ca3pos38008999.1	3	38008999	2.53e-06	0.0780669	269	-1.45496	0		Ca2pos31274904.1	2	31274904	2.41819e-08	0.362454	269	2.75493	0.0507163		Ca4pos4771052.1	4	4771052	3.50175e-06	0.0929368	269	1.36781	0
Ca2pos29170648.1	3	38034744	3.64467e-06	0.0966543	269	1.3287	7.39167e-09		Ca3pos38034744.1	3	38034744	3.64e-06	0.0966543	269	1.3287	7.39e-09		Ca4pos28662784.1	4	28662784	2.78669e-09	0.275093	269	-2.40265	0.458525		Ca4pos4776453.1	4	4776453	7.45372e-06	0.0817844	269	-1.29997	0
Ca2pos35009175.1	3	38057183	3.90544e-06	0.0762082	269	1.4043	0.0014944		Ca3pos38057183.1	3	38057183	3.91e-06	0.0762082	269	1.4043	0.00149439		Ca4pos34388303.1	4	34388303	2.29855e-07	0.0743494	269	3.23901	0.138389		Ca4pos4776454.1	4	4776454	7.45372e-06	0.0817844	269	1.29997	0
Ca2pos35413230.1	3	38057193	9.16763e-07	0.0762082	269	1.48954	8.99019e-09		Ca3pos38057193.1	3	38057193	9.17e-07	0.0762082	269	1.48954	8.99e-09		Ca4pos42120377.1	4	42120377	1.8497e-27	0.498141	269	-53.8609	0.169463		Ca4pos4778261.1	4	4778261	1.31654e-06	0.0836431	269	1.45263	0.320481
Ca4pos17341878.1	3	38057228	4.07534e-06	0.0743494	269	-1.41526	0		Ca3pos38057228.1	3	38057228	4.08e-06	0.0743494	269	-1.41526	0		Ca4pos47323418.1	4	47323418	1.89772e-09	0.0780669	269	2.82979	0.149992		Ca4pos4778266.1	4	4778266	5.44193e-06	0.0855019	269	-1.36297	0
Ca4pos24997998.1	3	38063432	3.02774e-06	0.0892193	269	-1.3918	4.82009e-08		Ca3pos38063432.1	3	38063432	3.03e-06	0.0892193	269	-1.3918	4.82e-08		Ca5pos4191164.1	5	4191164	2.98885e-06	0.1171	269	2.0627	10.7229		Ca4pos4779099.1	4	4779099	4.36138e-06	0.0780669	269	-1.37644	3.39803
Ca5pos9396198.1	3	38063441	1.83175e-06	0.0966543	269	-1.38747	1.68357e-07		Ca3pos38063441.1	3	38063441	1.83e-06	0.0966543	269	-1.38747	1.68e-07		Ca5pos18279819.1	5	18279819	2.75406e-07	0.152416	269	-2.26517	0.162982		Ca4pos33912436.1	4	33912436	6.24865e-06	0.498141	269	-8.35037	0
Ca5pos9396203.1	3	38068021	3.41877e-06	0.0762082	269	1.43529	1.56751e-07		Ca3pos38068021.1	3	38068021	3.42e-06	0.0762082	269	1.43529	1.57e-07		Ca5pos31850814.1	5	31850814	1.98047e-05	0.492565	269	-6.06613	73.209		Ca4pos45508745.1	4	45508745	8.05028e-06	0.0613383	269	-1.34657	0
Ca5pos9396206.1	3	38080272	2.02846e-06	0.0743494	269	1.48659	2.08251e-09		Ca3pos38080272.1	3	38080272	2.03e-06	0.0743494	269	1.48659	2.08e-09		Ca6pos1492246.1	6	1492246	1.79011e-09	0.498141	269	-19.2476	0.419071		Ca5pos6747864.1	5	6747864	1.10382e-05	0.143123	269	1.10222	0.358584
Ca6pos39853527.1	3	38100180	9.97549e-07	0.0687732	269	1.56276	7.49477e-10		Ca3pos38100180.1	3	38100180	9.98e-07	0.0687732	269	1.56276	7.49e-10		Ca7pos24984561.1	7	24984561	1.89549e-05	0.0594796	269	-2.48443	0.219475		Ca5pos33032029.1	5	33032029	3.23447e-06	0.0464684	269	-1.45863	0.530854
Ca6pos41992887.1	3	38100212	3.89821e-06	0.0743494	269	-1.44438	0.320031		Ca3pos38100212.1	3	38100212	3.9e-06	0.0743494	269	-1.44438	0.320031		Ca7pos37238110.1	7	37238110	1.61989e-11	0.0947955	269	2.4543	0.180213		Ca5pos41523197.1	5	41523197	1.96058e-06	0.035316	269	-1.64533	0.315769
Ca6pos46985254.1	3	38106616	3.91599e-06	0.0539033	269	1.53493	3.81922e-08		Ca3pos38106616.1	3	38106616	3.92e-06	0.0539033	269	1.53493	3.82e-08		Ca7pos41241912.1	7	41241912	6.84237e-06	0.355019	269	-1.85427	0.129594		Ca5pos42272729.1	5	42272729	2.0238e-07	0.0576208	269	1.54887	6.37243
Ca7pos25427142.1	3	38114728	3.73353e-07	0.13197	269	1.33945	0.620491		Ca3pos38114728.1	3	38114728	3.73e-07	0.13197	269	1.33945	0.620491		Ca7pos47827274.1	7	47827274	6.71954e-07	0.098513	269	2.36759	0.0765637		Ca5pos47965279.1	5	47965279	9.71433e-06	0.167286	269	-0.800394	5.15701
Ca8pos15057733.1	7	6667809	4.00699e-06	0.0613383	269	-1.64224	1.11459		Ca7pos6667809.1	7	6667809	4.01e-06	0.0613383	269	-1.64224	1.11459		Ca8pos9956153.1	8	9956153	1.69432e-07	0.126394	269	-2.63414	0.132264		Ca7pos41532907.1	7	41532907	7.54732e-06	0.286245	269	1.0216	7.9172
Location 1
MLM
SNP	Chromosome	Position	P.value	maf	nobs	effect	PVE(%)											Location 3									Location 4
Ca1pos18676690.1	1	18676690	1.29264e-05	0.14684	269	-1.68873	0.691737											SNP	Chromosome	Position	P.value	maf	nobs	effect	PVE(%)		SNP	Chromosome	Position	P.value	maf	nobs	effect	PVE(%)
Ca1pos31944429.1	1	31944429	5.94826e-05	0.0539033	269	-2.28388	2.68355e-09											Ca1pos1378842.1	1	1378842	5.39214e-05	0.104089	269	0.927605	2.09767		Ca1pos1378842.1	1	1378842	5.39214e-05	0.104089	269	0.927605	2.09767
Ca2pos23719723.1	2	23719723	4.87198e-05	0.260223	269	-1.43384	0.0402354											Ca1pos3076296.1	1	3076296	2.81485e-05	0.178439	269	-0.783218	6.7777		Ca1pos3076296.1	1	3076296	2.81485e-05	0.178439	269	-0.783218	6.7777
Ca2pos29170648.1	2	29170648	9.38423e-05	0.250929	269	-1.37085	2.2193e-08											Ca1pos3105289.1	1	3105289	4.73074e-05	0.184015	269	-0.751678	1.50202		Ca1pos3105289.1	1	3105289	4.73074e-05	0.184015	269	-0.751678	1.50202
Ca2pos34519780.1	2	34519780	5.79577e-05	0.0892193	269	-1.83906	0.143775											Ca1pos37122468.1	1	37122468	2.90634e-05	0.494424	269	-4.7613	2.33014e-08		Ca1pos37122468.1	1	37122468	2.90634e-05	0.494424	269	-4.7613	2.33014e-08
Ca2pos35244123.1	2	35244123	4.31311e-05	0.0743494	269	-1.77167	0.397814											Ca1pos39647846.1	1	39647846	1.5405e-05	0.143123	269	1.14979	5.74881e-09		Ca1pos39647846.1	1	39647846	1.5405e-05	0.143123	269	1.14979	5.74881e-09
Ca2pos35311642.1	2	35311642	7.1007e-05	0.0799257	269	-1.6021	0.169312											Ca2pos28823139.1	2	28823139	4.73415e-05	0.0483271	269	-1.39877	0.973873		Ca2pos28823139.1	2	28823139	4.73415e-05	0.0483271	269	-1.39877	0.973873
Ca3pos11283934.1	3	11283934	5.26232e-05	0.150558	269	-1.55234	0.775536											Ca3pos19707707.1	3	19707707	3.92686e-05	0.180297	269	0.650186	0.578064		Ca3pos19707707.1	3	19707707	3.92686e-05	0.180297	269	0.650186	0.578064
Ca4pos4893399.1	4	4893399	5.49389e-05	0.109665	269	-1.49948	0.260902											Ca3pos25805689.1	3	25805689	6.08794e-05	0.286245	269	0.972637	0		Ca3pos25805689.1	3	25805689	6.08794e-05	0.286245	269	0.972637	0
Ca4pos24997998.1	4	24997998	1.74458e-05	0.118959	269	-1.78638	0											Ca3pos25805690.1	3	25805690	6.08794e-05	0.286245	269	0.972637	6.25802e-09		Ca3pos25805690.1	3	25805690	6.08794e-05	0.286245	269	0.972637	6.25802e-09
Ca5pos16354503.1	5	16354503	5.91616e-05	0.0520446	269	-2.30116	0.0162543											Ca4pos32772485.1	4	32772485	2.04399e-05	0.498141	269	-8.35036	0.332071		Ca4pos32772485.1	4	32772485	2.04399e-05	0.498141	269	-8.35036	0.332071
Ca6pos23939605.1	6	23939605	6.458e-05	0.0650558	269	1.83154	0.323246											Ca5pos33032029.1	5	33032029	3.78539e-05	0.0464684	269	-1.37023	0.406088		Ca5pos33032029.1	5	33032029	3.78539e-05	0.0464684	269	-1.37023	0.406088
Ca6pos43046545.1	6	43046545	8.71216e-05	0.0762082	269	-1.91157	0.187753											Ca5pos41523197.1	5	41523197	6.73651e-05	0.035316	269	-1.4437	6.95039		Ca5pos41523197.1	5	41523197	6.73651e-05	0.035316	269	-1.4437	6.95039
Ca6pos45470507.1	6	45470507	6.24202e-05	0.0817844	269	-1.902	0.316811											Ca5pos42012947.1	5	42012947	3.51975e-05	0.0799257	269	1.14842	2.70398		Ca5pos42012947.1	5	42012947	3.51975e-05	0.0799257	269	1.14842	2.70398
Ca6pos54925549.1	6	54925549	5.97109e-05	0.098513	269	-1.68197	0.329827											Ca5pos42074441.1	5	42074441	1.15919e-05	0.0557621	269	1.39919	0.0500729		Ca5pos42074441.1	5	42074441	1.15919e-05	0.0557621	269	1.39919	0.0500729
Ca6pos59460669.1	6	59460669	5.49718e-05	0.0613383	269	-2.21201	0.193479											Ca5pos42272729.1	5	42272729	2.08582e-05	0.0576208	269	1.33688	0.849343		Ca5pos42272729.1	5	42272729	2.08582e-05	0.0576208	269	1.33688	0.849343
Ca7pos25427142.1	7	25427142	1.17276e-05	0.1171	269	-1.84159	0.166918											Ca6pos14512673.1	6	14512673	2.23162e-05	0.0594796	269	1.61824	1.78936		Ca6pos14512673.1	6	14512673	2.23162e-05	0.0594796	269	1.61824	1.78936
Ca7pos26452013.1	7	26452013	9.41193e-05	0.0371747	269	-2.60673	0.385058											Ca6pos27009414.1	6	27009414	5.12228e-05	0.304833	269	0.964097	0.015126		Ca6pos27009414.1	6	27009414	5.12228e-05	0.304833	269	0.964097	0.015126
Ca7pos37640886.1	7	37640886	2.60411e-05	0.0873606	269	1.78585	0.237243											Ca7pos15917660.1	7	15917660	2.38641e-05	0.0724907	269	1.43451	0.0487045		Ca7pos15917660.1	7	15917660	2.38641e-05	0.0724907	269	1.43451	0.0487045
Ca8pos15011601.1	8	15011601	8.71067e-05	0.0929368	269	1.34677	0.00935327											Ca7pos30666345.1	7	30666345	2.04399e-05	0.498141	269	-8.35036	0.246857		Ca7pos30666345.1	7	30666345	2.04399e-05	0.498141	269	-8.35036	0.246857
																		Ca8pos12985289.1	8	12985289	4.31642e-05	0.496283	269	-5.67281	3.09465e-07		Ca8pos12985289.1	8	12985289	4.31642e-05	0.496283	269	-5.67281	3.09465e-07

## Sheet: Sheet5
		Supplementary Table 6 : List of the MTAs identified for yield for association panel
Blink
Location 1									Location 2									Location 3									Location 4
SNP	Chromosome	Position	P.value	maf	nobs	effect	PVE (%)		SNP	Chromosome	Position	P.value	maf	nobs	effect	PVE(%)		SNP	Chromosome	Position	P.value	maf	nobs	effect	PVE(%)		SNP	Chromosome	Position	P.value	maf	nobs	effect
Ca1pos38264777.1	1	6255	1.33e-06	0.226766	269	NA	0		Ca1pos6255.1	1	6255	1.33e-06	0.226766	269	NA	0		Ca1pos32031619.1	1	32031619	7.90596e-05	0.0929368	269	NA	2.09483		Ca1pos18324502.1	1	18324502	9.98411e-05	0.459108	269	NA
Ca2pos11876379.1	1	6279	1.3e-05	0.213755	269	NA	0		Ca1pos6279.1	1	6279	1.3e-05	0.213755	269	NA	0		Ca1pos45279420.1	1	45279420	5.9366e-05	0.063197	269	NA	1.59016		Ca2pos6671799.1	2	6671799	1.7772e-05	0.100372	269	NA
Ca3pos20481023.1	1	6283	1.7e-05	0.217472	269	NA	0		Ca1pos6283.1	1	6283	1.7e-05	0.217472	269	NA	0		Ca2pos23193120.1	2	23193120	6.26159e-06	0.208178	269	NA	17.4799		Ca2pos8005773.1	2	8005773	8.85899e-05	0.070632	269	NA
Ca3pos26373433.1	1	38832283	2.24e-05	0.0799257	269	NA	0.0103317		Ca1pos38832283.1	1	38832283	2.24e-05	0.0799257	269	NA	0.0103317		Ca3pos12031555.1	3	12031555	4.2055e-06	0.0855019	269	NA	0		Ca2pos20579490.1	2	20579490	1.69157e-05	0.0483271	269	NA
Ca3pos28737668.1	1	47772044	1.38e-05	0.286245	269	NA	0.0961404		Ca1pos47772044.1	1	47772044	1.38e-05	0.286245	269	NA	0.0961404		Ca4pos32389945.1	4	32389945	1.14562e-05	0.0910781	269	NA	0		Ca3pos4941617.1	3	4941617	3.80277e-05	0.167286	269	NA
Ca3pos35979412.1	2	13878686	7.76e-06	0.0855019	269	NA	0.20884		Ca2pos13878686.1	2	13878686	7.76e-06	0.0855019	269	NA	0.20884		Ca4pos32774796.1	4	32774796	1.96485e-05	0.0427509	269	NA	3.20154e-08		Ca4pos45536872.1	4	45536872	8.43805e-05	0.063197	269	NA
Ca3pos36360707.1	2	21012225	5.55e-06	0.104089	269	NA	0.625776		Ca2pos21012225.1	2	21012225	5.55e-06	0.104089	269	NA	0.625776		Ca4pos40079855.1	4	40079855	7.35401e-05	0.070632	269	NA	0		Ca5pos1902319.1	5	1902319	0.000112937	0.118959	269	NA
Ca3pos36437426.1	3	13038210	1.73e-05	0.105948	269	NA	1.26311		Ca3pos13038210.1	3	13038210	1.73e-05	0.105948	269	NA	1.26311		Ca4pos40174019.1	4	40174019	5.51938e-05	0.0762082	269	NA	8.04442e-10		Ca5pos9217749.1	5	9217749	3.80359e-05	0.0780669	269	NA
Ca3pos36441575.1	3	21635688	3.74e-06	0.498141	269	NA	6.73e-09		Ca3pos21635688.1	3	21635688	3.74e-06	0.498141	269	NA	6.73e-09		Ca4pos40174094.1	4	40174094	4.34853e-05	0.0817844	269	NA	0.208919		Ca5pos15167042.1	5	15167042	7.19461e-05	0.0613383	269	NA
Ca3pos36441593.1	3	39478246	1.64e-05	0.0687732	269	NA	0		Ca3pos39478246.1	3	39478246	1.64e-05	0.0687732	269	NA	0		Ca4pos40390856.1	4	40390856	3.32652e-05	0.0855019	269	NA	1.77244		Ca5pos23805944.1	5	23805944	8.21036e-05	0.0929368	269	NA
Ca3pos36441594.1	5	11230659	2.25e-05	0.171004	269	NA	0.28036		Ca5pos11230659.1	5	11230659	2.25e-05	0.171004	269	NA	0.28036		Ca4pos40521933.1	4	40521933	5.3051e-05	0.113383	269	NA	1.89525e-07		Ca5pos26511202.1	5	26511202	1.11707e-05	0.126394	269	NA
Ca3pos36441595.1	6	13890147	4.73e-06	0.0464684	269	NA	0.108248		Ca6pos13890147.1	6	13890147	4.73e-06	0.0464684	269	NA	0.108248		Ca4pos40600025.1	4	40600025	5.0795e-05	0.143123	269	NA	1.38324		Ca6pos9820735.1	6	9820735	0.000113886	0.431227	269	NA
Ca3pos36442468.1	6	33376818	1.24e-05	0.496283	269	NA	1.28554		Ca6pos33376818.1	6	33376818	1.24e-05	0.496283	269	NA	1.28554		Ca5pos10688549.1	5	10688549	4.11108e-08	0.498141	269	NA	0.41427		Ca6pos9851388.1	6	9851388	6.64369e-05	0.438662	269	NA
Ca3pos36442907.1	6	58787339	2.07e-05	0.405204	269	NA	0.603057		Ca6pos58787339.1	6	58787339	2.07e-05	0.405204	269	NA	0.603057		Ca5pos19380687.1	5	19380687	4.42662e-05	0.0799257	269	NA	0.399756		Ca6pos9851392.1	6	9851392	0.000115247	0.433086	269	NA
Ca3pos36443761.1	7	21354846	2.34e-05	0.19145	269	NA	19.2729		Ca7pos21354846.1	7	21354846	2.34e-05	0.19145	269	NA	19.2729		Ca6pos33318588.1	6	33318588	4.90214e-05	0.1171	269	NA	4.67148		Ca6pos9866009.1	6	9866009	0.000108687	0.453532	269	NA
Ca3pos36443823.1	7	21452720	2.8e-05	0.202602	269	NA	0.444337		Ca7pos21452720.1	7	21452720	2.8e-05	0.202602	269	NA	0.444337		Ca7pos13111085.1	7	13111085	5.55309e-05	0.498141	269	NA	3.86092		Ca6pos9870861.1	6	9870861	0.000112748	0.421933	269	NA
Ca3pos36444230.1	7	21553339	1.81e-05	0.224907	269	NA	0.353417		Ca7pos21553339.1	7	21553339	1.81e-05	0.224907	269	NA	0.353417		Ca7pos36683528.1	7	36683528	8.88909e-09	0.453532	269	NA	0.337732		Ca6pos11269067.1	6	11269067	1.51265e-05	0.447955	269	NA
Ca3pos36446364.1	7	24845067	1.83e-05	0.364312	269	NA	0.482433		Ca7pos24845067.1	7	24845067	1.83e-05	0.364312	269	NA	0.482433		Ca7pos42602238.1	7	42602238	6.06653e-09	0.10223	269	NA	0.366126		Ca6pos46897064.1	6	46897064	9.16302e-05	0.156134	269	NA
Ca3pos36446372.1	7	44351034	2.9e-05	0.269517	269	NA	0.270835		Ca7pos44351034.1	7	44351034	2.9e-05	0.269517	269	NA	0.270835		Ca7pos43735892.1	7	43735892	7.69101e-05	0.0669145	269	NA	0.211609		Ca7pos15944737.1	7	15944737	9.9162e-05	0.198885	269	NA
Ca7pos22410437.1	7	46917274	2.12e-05	0.224907	269	NA	0.553356		Ca7pos46917274.1	7	46917274	2.12e-05	0.224907	269	NA	0.553356		Ca8pos5080177.1	8	5080177	9.61486e-06	0.0427509	269	NA	0.292813		Ca7pos16090676.1	7	16090676	4.99856e-05	0.100372	269	NA
Location 1
FarmCPU									Location 2									Location 3
SNP	Chromosome	Position	P.value	maf	nobs	effect	PVE(%)		SNP	Chromosome	Position	P.value	maf	nobs	effect	PVE(%)		SNP	Chromosome	Position	P.value	maf	nobs	effect	PVE(%)		SNP	Chromosome	Position	P.value	maf	nobs	effect
Ca1pos38264777.1	1	6255	1.32947e-06	0.226766	269	0.23931	0		Ca1pos6255.1	1	6255	1.33e-06	0.226766	269	0.23931	0		Ca1pos5205424.1	1	5205424	6.93816e-06	0.492565	269	-0.950316	0.820147		Ca1pos18324502.1	1	18324502	0.000100016	0.459108	269	3.37517
Ca2pos11876379.1	1	6279	1.30315e-05	0.213755	269	-0.217641	0		Ca1pos6279.1	1	6279	1.3e-05	0.213755	269	-0.217641	0		Ca1pos16719277.1	1	16719277	5.96717e-06	0.315985	269	1.71179	24.5498		Ca2pos6671799.1	2	6671799	1.7809e-05	0.100372	269	-2.13138
Ca3pos20481023.1	1	6283	1.70509e-05	0.217472	269	0.214546	0		Ca1pos6283.1	1	6283	1.71e-05	0.217472	269	0.214546	0		Ca1pos25525816.1	1	25525816	8.25213e-11	0.0576208	269	-3.74057	3.37647		Ca2pos8005773.1	2	8005773	8.87475e-05	0.070632	269	-3.04144
Ca3pos26373433.1	1	38832283	2.24645e-05	0.0799257	269	0.291559	0.0103317		Ca1pos38832283.1	1	38832283	2.25e-05	0.0799257	269	0.291559	0.0103317		Ca1pos37934120.1	1	37934120	1.98354e-05	0.282528	269	-1.82815	1.04616		Ca2pos20579490.1	2	20579490	1.69511e-05	0.0483271	269	2.73302
Ca3pos28737668.1	1	47772044	1.38648e-05	0.286245	269	0.221519	0.0961404		Ca1pos47772044.1	1	47772044	1.39e-05	0.286245	269	0.221519	0.0961404		Ca1pos43273713.1	1	43273713	1.87654e-05	0.466543	269	-3.75134	0.23047		Ca3pos4941617.1	3	4941617	3.81015e-05	0.167286	269	2.34345
Ca3pos35979412.1	2	13878686	7.78426e-06	0.0855019	269	0.304898	0.20884		Ca2pos13878686.1	2	13878686	7.78e-06	0.0855019	269	0.304898	0.20884		Ca2pos20818212.1	2	20818212	7.94613e-08	0.13197	269	-2.04681	0.155426		Ca4pos45536872.1	4	45536872	8.45315e-05	0.063197	269	2.81614
Ca3pos36360707.1	2	21012225	5.57106e-06	0.104089	269	0.287144	0.625776		Ca2pos21012225.1	2	21012225	5.57e-06	0.104089	269	0.287144	0.625776		Ca3pos12031555.1	3	12031555	1.84461e-10	0.0855019	269	-2.8495	0.515418		Ca5pos1902319.1	5	1902319	0.000113133	0.118959	269	-2.45408
Ca3pos36437426.1	3	13038210	1.73379e-05	0.105948	269	-0.265354	1.26311		Ca3pos13038210.1	3	13038210	1.73e-05	0.105948	269	-0.265354	1.26311		Ca3pos16197808.1	3	16197808	6.32383e-09	0.494424	269	11.1957	0.0521579		Ca5pos9217749.1	5	9217749	3.81097e-05	0.0780669	269	3.04933
Ca3pos36441575.1	3	21635688	3.75252e-06	0.498141	269	1.9087	6.72503e-09		Ca3pos21635688.1	3	21635688	3.75e-06	0.498141	269	1.9087	6.73e-09		Ca4pos24921904.1	4	24921904	9.2148e-10	0.35316	269	2.77023	5.3554		Ca5pos15167042.1	5	15167042	7.20769e-05	0.0613383	269	3.25712
Ca3pos36441593.1	3	39478246	1.64646e-05	0.0687732	269	-0.251752	0		Ca3pos39478246.1	3	39478246	1.65e-05	0.0687732	269	-0.251752	0		Ca4pos32389945.1	4	32389945	1.15186e-08	0.0910781	269	-2.57833	0.258851		Ca5pos23805944.1	5	23805944	8.22509e-05	0.0929368	269	2.71485
Ca3pos36441594.1	5	11230659	2.26065e-05	0.171004	269	0.224821	0.28036		Ca5pos11230659.1	5	11230659	2.26e-05	0.171004	269	0.224821	0.28036		Ca5pos5513140.1	5	5513140	7.83804e-08	0.139405	269	2.31009	0.201816		Ca5pos26511202.1	5	26511202	1.1195e-05	0.126394	269	1.84025
Ca3pos36441595.1	6	13890147	4.74786e-06	0.0464684	269	-0.312154	0.108248		Ca6pos13890147.1	6	13890147	4.75e-06	0.0464684	269	-0.312154	0.108248		Ca5pos10688549.1	5	10688549	5.21824e-15	0.498141	269	9.78195	9.01325		Ca6pos9820735.1	6	9820735	0.000114084	0.431227	269	1.16689
Ca3pos36442468.1	6	33376818	1.24713e-05	0.496283	269	1.27624	1.28554		Ca6pos33376818.1	6	33376818	1.25e-05	0.496283	269	1.27624	1.28554		Ca5pos14421063.1	5	14421063	3.27926e-05	0.237918	269	1.57592	0		Ca6pos9851388.1	6	9851388	6.65588e-05	0.438662	269	1.22774
Ca3pos36442907.1	6	58787339	2.07563e-05	0.405204	269	-0.127998	0.603057		Ca6pos58787339.1	6	58787339	2.08e-05	0.405204	269	-0.127998	0.603057		Ca6pos28353709.1	6	28353709	4.20997e-08	0.492565	269	-10.8493	0.88559		Ca6pos9851392.1	6	9851392	0.000115446	0.433086	269	1.18923
Ca3pos36443761.1	7	21354846	2.34306e-05	0.19145	269	-0.150937	19.2729		Ca7pos21354846.1	7	21354846	2.34e-05	0.19145	269	-0.150937	19.2729		Ca6pos28439530.1	6	28439530	3.33354e-05	0.20632	269	1.60099	1.41638		Ca6pos9866009.1	6	9866009	0.000108876	0.453532	269	1.21144
Ca3pos36443823.1	7	21452720	2.80874e-05	0.202602	269	-0.1416	0.444337		Ca7pos21452720.1	7	21452720	2.81e-05	0.202602	269	-0.1416	0.444337		Ca6pos30153848.1	6	30153848	3.2192e-05	0.0724907	269	2.397	6.15546		Ca6pos9870861.1	6	9870861	0.000112944	0.421933	269	-1.15128
Ca3pos36444230.1	7	21553339	1.8177e-05	0.224907	269	0.143069	0.353417		Ca7pos21553339.1	7	21553339	1.82e-05	0.224907	269	0.143069	0.353417		Ca7pos36683528.1	7	36683528	1.16291e-16	0.453532	269	-6.94178	0.572006		Ca6pos11269067.1	6	11269067	1.51586e-05	0.447955	269	-1.47687
Ca3pos36446364.1	7	24845067	1.83383e-05	0.364312	269	-0.258653	0.482433		Ca7pos24845067.1	7	24845067	1.83e-05	0.364312	269	-0.258653	0.482433		Ca7pos42602238.1	7	42602238	1.00499e-05	0.10223	269	-1.86789	0.0372156		Ca6pos46897064.1	6	46897064	9.17927e-05	0.156134	269	-2.57454
Ca3pos36446372.1	7	44351034	2.9085e-05	0.269517	269	-0.134443	0.270835		Ca7pos44351034.1	7	44351034	2.91e-05	0.269517	269	-0.134443	0.270835		Ca7pos45229873.1	7	45229873	1.20103e-05	0.16171	269	-1.74398	0.175306		Ca7pos15944737.1	7	15944737	9.93363e-05	0.198885	269	-2.13361
Ca7pos22410437.1	7	46917274	2.12109e-05	0.224907	269	-0.141563	0.553356		Ca7pos46917274.1	7	46917274	2.12e-05	0.224907	269	-0.141563	0.553356		Ca8pos10886016.1	8	10886016	3.99988e-07	0.163569	269	-1.94522	0.850928		Ca7pos16090676.1	7	16090676	5.008e-05	0.100372	269	2.73101
MLM
Location 1									Location 2
SNP	Chromosome	Position	P.value	maf	nobs	effect	PVE(%)		SNP	Chromosome	Position	P.value	maf	nobs	effect	PVE(%)
Ca1pos43027683.1	1	43027683	2.90928e-05	0.0687732	269	2.51832	0.273505		Ca1pos6218.1	1	6218	0.000120615	0.200743	269	-0.21348	0.103983
Ca2pos35627200.1	2	35627200	7.5622e-05	0.163569	269	1.86915	0		Ca1pos6226.1	1	6226	0.000126693	0.204461	269	0.211634	1.12386
Ca2pos35640564.1	2	35640564	7.43165e-05	0.0966543	269	2.17616	0.209471		Ca1pos6233.1	1	6233	0.000134519	0.213755	269	-0.210032	0.0396772
Ca2pos35640585.1	2	35640585	7.13696e-05	0.141264	269	1.94664	0.407489		Ca1pos6255.1	1	6255	6.99987e-06	0.226766	269	0.245942	2.585
Ca2pos35640590.1	2	35640590	8.55467e-05	0.150558	269	1.89705	0.423264		Ca1pos6279.1	1	6279	0.000111033	0.213755	269	-0.211722	1.371
Ca3pos5841053.1	3	5841053	1.36474e-05	0.0817844	269	2.48838	4.17087		Ca1pos6283.1	1	6283	9.00773e-05	0.217472	269	0.214456	0.0171584
Ca3pos28717001.1	3	28717001	6.56729e-05	0.118959	269	1.64363	1.03458		Ca2pos8429941.1	2	8429941	0.000116494	0.449814	269	-0.23084	0.358386
Ca3pos34770438.1	3	34770438	1.79443e-05	0.0520446	269	2.45438	0		Ca2pos21012225.1	2	21012225	4.5388e-05	0.104089	269	0.284248	0
Ca4pos4165675.1	4	4165675	7.23167e-05	0.306691	269	-1.06337	0.472915		Ca3pos9539585.1	3	9539585	7.25551e-05	0.157993	269	0.235364	3.89669e-08
Ca4pos4165676.1	4	4165676	8.40762e-05	0.30855	269	-1.05645	0.0730187		Ca3pos21635688.1	3	21635688	2.68067e-05	0.498141	269	1.90869	0.541213
Ca4pos15581956.1	4	15581956	5.62985e-05	0.198885	269	-1.71687	0		Ca3pos23001916.1	3	23001916	3.68709e-05	0.167286	269	0.176834	0
Ca5pos25301733.1	5	25301733	4.85477e-05	0.144981	269	1.87114	0.164319		Ca3pos39478246.1	3	39478246	4.41184e-05	0.0687732	269	-0.261659	0
Ca6pos25441268.1	6	25441268	9.22454e-06	0.100372	269	2.31764	0.246791		Ca4pos38634344.1	4	38634344	0.000107334	0.237918	269	0.214167	9.04252
Ca6pos25995447.1	6	25995447	5.33296e-05	0.115242	269	1.98644	0.52681		Ca4pos39035791.1	4	39035791	9.94918e-05	0.0520446	269	-0.289271	0.239665
Ca6pos25995465.1	6	25995465	4.9273e-06	0.0780669	269	2.63244	0.210019		Ca5pos15982686.1	5	15982686	0.000114453	0.0669145	269	0.312202	5.98405
Ca7pos22410433.1	7	22410433	6.18332e-05	0.115242	269	-1.98195	0.126222		Ca6pos32785805.1	6	32785805	0.000122845	0.19145	269	-0.151232	0.26254
Ca7pos22410437.1	7	22410437	1.77139e-05	0.115242	269	-2.12454	0.241162		Ca6pos33376818.1	6	33376818	6.90743e-05	0.496283	269	1.27623	0.340588
Ca7pos29241664.1	7	29241664	3.07171e-05	0.172862	269	1.82536	0		Ca7pos31696546.1	7	31696546	9.90908e-05	0.105948	269	0.226877	13.7322
Ca7pos29241672.1	7	29241672	2.37277e-05	0.306691	269	0.998886	0.469586		Ca7pos45378144.1	7	45378144	8.81056e-05	0.098513	269	0.271298	0.142354
Ca7pos45691379.1	7	45691379	6.47593e-06	0.0315985	269	3.83966	0.137301		Ca8pos15670064.1	8	15670064	0.000113117	0.189591	269	0.16344	0.505506

## Sheet: Sheet6
		Supplementary Table 7 : List of the MTAs identified for NOP for association panel
	Blink
	Location 1		Blink							Location 2									Location 3									Location 4
	SNP	Chromosome	Position	P.value	maf	nobs	effect	PVE(%)		SNP	Chromosome	Position	P.value	maf	nobs	effect	PVE(%)		SNP	Chromosome	Position	P.value	maf	nobs	effect	PVE (%5)		SNP	Chromosome	Position	P.value	maf	nobs	effect	PVE(%)
	Ca1pos8737036.1	1	8737036	1.47453e-05	0.13197	269	NA	0.369246		Ca1pos28268223.1	1	28268223	3.51507e-05	0.1171	269	NA	0.259954		Ca1pos15697989.1	1	15697989	1.60833e-05	0.159851	269	NA	0.204909		Ca1pos26391929.1	1	26391929	9.12955e-06	0.0836431	269	NA	0
	Ca1pos8737037.1	1	8737037	1.47453e-05	0.13197	269	NA	0.853664		Ca1pos30561971.1	1	30561971	0.000123241	0.0613383	269	NA	0		Ca1pos23161835.1	1	23161835	3.29148e-05	0.16171	269	NA	10.9526		Ca3pos38800878.1	3	38800878	1.08176e-05	0.0669145	269	NA	0.166
	Ca1pos8820515.1	1	8820515	4.44097e-05	0.130112	269	NA	0.113279		Ca1pos45176043.1	1	45176043	8.71348e-05	0.10223	269	NA	0.467137		Ca1pos26684177.1	1	26684177	1.19653e-05	0.0724907	269	NA	0.19904		Ca4pos7479524.1	4	7479524	8.87148e-06	0.0799257	269	NA	0.297283
	Ca1pos14062422.1	1	14062422	3.56935e-06	0.195167	269	NA	0.135159		Ca2pos18703655.1	2	18703655	7.69121e-05	0.0687732	269	NA	0.955991		Ca1pos29998434.1	1	29998434	2.14762e-05	0.070632	269	NA	3.2431e-09		Ca5pos5411271.1	5	5411271	1.34131e-05	0.1171	269	NA	0.0970796
	Ca1pos14070458.1	1	14070458	6.04909e-06	0.171004	269	NA	0.429905		Ca2pos20563121.1	2	20563121	9.44568e-05	0.0650558	269	NA	2.65253e-09		Ca1pos36072386.1	1	36072386	6.24224e-06	0.159851	269	NA	0		Ca5pos24452364.1	5	24452364	1.64599e-09	0.0966543	269	NA	0
	Ca1pos46718466.1	1	46718466	3.92182e-05	0.115242	269	NA	2.16621e-09		Ca2pos24434890.1	2	24434890	3.21483e-05	0.306691	269	NA	1.19169e-09		Ca1pos37257675.1	1	37257675	3.16634e-05	0.152416	269	NA	0		Ca5pos40593998.1	5	40593998	2.79859e-06	0.0669145	269	NA	1.06135e-09
	Ca2pos11422406.1	2	11422406	2.1403e-05	0.0334572	269	NA	0.0146291		Ca3pos8306330.1	3	8306330	5.64609e-05	0.0334572	269	NA	0.107282		Ca2pos25142680.1	2	25142680	2.59028e-05	0.128253	269	NA	1.11804e-09		Ca5pos40927327.1	5	40927327	9.85548e-06	0.063197	269	NA	0.0181661
	Ca2pos11422414.1	2	11422414	3.55566e-05	0.063197	269	NA	0.387487		Ca3pos10418330.1	3	10418330	8.53474e-05	0.0446097	269	NA	0		Ca3pos7212345.1	3	7212345	2.68994e-05	0.098513	269	NA	0		Ca5pos41843108.1	5	41843108	1.42703e-05	0.0520446	269	NA	0
	Ca3pos3042321.1	3	3042321	3.80615e-05	0.098513	269	NA	0		Ca3pos12539140.1	3	12539140	2.10731e-05	0.0669145	269	NA	2.63293		Ca4pos8909416.1	4	8909416	4.1119e-06	0.126394	269	NA	0		Ca5pos46679313.1	5	46679313	8.5992e-06	0.070632	269	NA	0.188755
	Ca3pos39844991.1	3	39844991	9.40153e-06	0.265799	269	NA	0.136493		Ca3pos13511310.1	3	13511310	0.000128768	0.0855019	269	NA	0.13168		Ca4pos38746029.1	4	38746029	3.11325e-05	0.124535	269	NA	0.446303		Ca6pos19285290.1	6	19285290	3.78437e-06	0.063197	269	NA	0
	Ca3pos39885397.1	3	39885397	1.25672e-05	0.314126	269	NA	0.276167		Ca3pos18487224.1	3	18487224	0.000134261	0.0539033	269	NA	0.32686		Ca5pos18197112.1	5	18197112	1.43431e-05	0.0724907	269	NA	0.983716		Ca6pos36560794.1	6	36560794	3.35544e-06	0.0836431	269	NA	0.925575
	Ca4pos19410981.1	4	19410981	8.10482e-06	0.381041	269	NA	0.252079		Ca3pos18490080.1	3	18490080	0.000123287	0.0576208	269	NA	1.44628		Ca5pos37273551.1	5	37273551	1.56607e-05	0.0557621	269	NA	0		Ca6pos42719196.1	6	42719196	1.10619e-05	0.0669145	269	NA	0.331187
	Ca5pos3834038.1	5	3834038	7.41608e-06	0.0780669	269	NA	0.149363		Ca4pos21069767.1	4	21069767	3.24336e-05	0.0390335	269	NA	1.08227		Ca5pos37273553.1	5	37273553	1.67355e-05	0.0576208	269	NA	4.58013e-08		Ca6pos42955859.1	6	42955859	4.82612e-06	0.070632	269	NA	0.308843
	Ca5pos46549190.1	5	46549190	8.45036e-06	0.0836431	269	NA	3.41079e-07		Ca5pos28386508.1	5	28386508	9.13933e-05	0.120818	269	NA	0.478214		Ca5pos37273561.1	5	37273561	3.11659e-05	0.0520446	269	NA	0.923499		Ca6pos56506889.1	6	56506889	1.60017e-13	0.360595	269	NA	0
	Ca6pos24093514.1	6	24093514	2.63194e-05	0.0520446	269	NA	0		Ca6pos5644587.1	6	5644587	5.75928e-05	0.0873606	269	NA	0.417102		Ca5pos47740156.1	5	47740156	1.53503e-05	0.486989	269	NA	0.583918		Ca7pos11736951.1	7	11736951	3.83563e-06	0.098513	269	NA	2.98062
	Ca6pos28350598.1	6	28350598	3.39458e-05	0.0966543	269	NA	1.6011e-08		Ca6pos12877557.1	6	12877557	2.67087e-05	0.0724907	269	NA	1.59498		Ca6pos14136381.1	6	14136381	8.07761e-06	0.0743494	269	NA	0.926491		Ca7pos12235301.1	7	12235301	6.88725e-06	0.0910781	269	NA	0.0823575
	Ca6pos53644742.1	6	53644742	3.24862e-05	0.0892193	269	NA	1.13621		Ca6pos55771020.1	6	55771020	4.61329e-05	0.0371747	269	NA	0.569663		Ca6pos53304572.1	6	53304572	1.08387e-05	0.0576208	269	NA	0.743386		Ca7pos40578069.1	7	40578069	9.53592e-06	0.0855019	269	NA	1.44463e-08
	Ca7pos27650319.1	7	27650319	4.41104e-05	0.0371747	269	NA	0.131156		Ca7pos28121222.1	7	28121222	0.000114013	0.453532	269	NA	0.0761951		Ca7pos39826886.1	7	39826886	1.68574e-05	0.120818	269	NA	0.632188		Ca7pos45910343.1	7	45910343	1.30926e-05	0.0910781	269	NA	0
	Ca7pos47164247.1	7	47164247	1.33266e-05	0.0855019	269	NA	1.00033		Ca8pos13398907.1	8	13398907	7.7942e-05	0.172862	269	NA	0.277376		Ca8pos14359546.1	8	14359546	2.85139e-05	0.459108	269	NA	0.719082		Ca7pos46709605.1	7	46709605	1.26713e-05	0.0613383	269	NA	0.109241
	Ca8pos13311157.1	8	13311157	1.16567e-05	0.0724907	269	NA	1.54775		Ca8pos16150428.1	8	16150428	5.57118e-05	0.154275	269	NA	0.490937		Ca8pos14366900.1	8	14366900	2.38918e-05	0.453532	269	NA			Ca8pos8052657.1	8	8052657	1.19087e-05	0.113383	269	NA	2.67084
	FarmCPU									FarmCPU
	Location 1									Location 2									Location 3									Location 4
	SNP	Chromosome	Position	P.value	maf	nobs	effect	PVE (%)		SNP	Chromosome	Position	P.value	maf	nobs	effect	PVE(%)		SNP	Chromosome	Position	P.value	maf	nobs	effect	PVE(%)		SNP	Chromosome	Position	P.value	maf	nobs	effect	PVE(%)
	Ca1pos8737036.1	1	8737036	1.47786e-05	0.13197	269	3.25523	0.369246		Ca1pos28268223.1	1	28268223	3.52036e-05	0.1171	269	-15.5882	0.259954		Ca1pos15697989.1	1	15697989	1.61108e-05	0.159851	269	-6.40438	0		Ca1pos22380207.1	1	22380207	4.49079e-05	0.211896	269	10.2316	0.646695
	Ca1pos8737037.1	1	8737037	1.47786e-05	0.13197	269	3.25523	0.853664		Ca1pos30561971.1	1	30561971	0.000123404	0.0613383	269	-17.8282	0		Ca1pos23161835.1	1	23161835	3.29675e-05	0.16171	269	-6.50151	0.204909		Ca1pos22380208.1	1	22380208	4.49079e-05	0.211896	269	10.2316	3.18052
	Ca1pos8820515.1	1	8820515	4.45002e-05	0.130112	269	3.06525	0.113279		Ca1pos45176043.1	1	45176043	8.72542e-05	0.10223	269	17.0698	0.467137		Ca1pos26684177.1	1	26684177	1.19863e-05	0.0724907	269	11.7835	10.9526		Ca1pos33019467.1	1	33019467	3.12516e-05	0.0855019	269	-13.4955	0.685101
	Ca1pos14062422.1	1	14062422	3.57845e-06	0.195167	269	2.92278	0.135159		Ca2pos18703655.1	2	18703655	7.70189e-05	0.0687732	269	20.5291	0.955991		Ca1pos29998434.1	1	29998434	2.1512e-05	0.070632	269	11.7698	0.19904		Ca1pos33872057.1	1	33872057	3.30984e-08	0.144981	269	16.8295	0.773186
	Ca1pos14070458.1	1	14070458	6.06387e-06	0.171004	269	2.83251	0.429905		Ca2pos20563121.1	2	20563121	9.45851e-05	0.0650558	269	20.8779	2.65253e-09		Ca1pos36072386.1	1	36072386	6.25385e-06	0.159851	269	7.23836	3.2431e-09		Ca2pos33959208.1	2	33959208	1.94689e-05	0.144981	269	11.7572	4.24488
	Ca1pos46718466.1	1	46718466	3.9299e-05	0.115242	269	3.1776	2.16621e-09		Ca2pos24434890.1	2	24434890	3.2197e-05	0.306691	269	20.6388	1.19169e-09		Ca1pos37257675.1	1	37257675	3.17143e-05	0.152416	269	-8.5952	0		Ca3pos6030446.1	3	6030446	2.3891e-07	0.126394	269	13.8056	0.782891
	Ca2pos11422406.1	2	11422406	2.14498e-05	0.0334572	269	6.82965	0.0146291		Ca3pos8306330.1	3	8306330	5.65418e-05	0.0334572	269	28.3941	0.107282		Ca2pos25142680.1	2	25142680	2.59452e-05	0.128253	269	-7.05376	0		Ca4pos32912345.1	4	32912345	5.06915e-11	0.10223	269	26.5873	1.34817
	Ca2pos11422414.1	2	11422414	3.56306e-05	0.063197	269	3.65256	0.387487		Ca3pos10418330.1	3	10418330	8.54646e-05	0.0446097	269	19.5526	0		Ca3pos7212345.1	3	7212345	2.69433e-05	0.098513	269	-10.1428	1.11804e-09		Ca4pos44215365.1	4	44215365	4.64883e-08	0.128253	269	-12.7411	0.102878
	Ca3pos3042321.1	3	3042321	3.81402e-05	0.098513	269	3.34503	0		Ca3pos12539140.1	3	12539140	2.11063e-05	0.0669145	269	-20.3118	2.63293		Ca4pos8909416.1	4	8909416	4.11981e-06	0.126394	269	-7.27446	0		Ca5pos6700611.1	5	6700611	3.2839e-08	0.208178	269	-12.557	2.45734
	Ca3pos39844991.1	3	39844991	9.42365e-06	0.265799	269	-2.2834	0.136493		Ca3pos13511310.1	3	13511310	0.000128937	0.0855019	269	15.829	0.13168		Ca4pos38746029.1	4	38746029	3.11826e-05	0.124535	269	6.62683	0		Ca5pos24452364.1	5	24452364	1.29676e-13	0.0966543	269	-19.747	0.476801
	Ca3pos39885397.1	3	39885397	1.25961e-05	0.314126	269	2.25268	0.276167		Ca3pos18487224.1	3	18487224	0.000134436	0.0539033	269	-18.5502	0.32686		Ca5pos18197112.1	5	18197112	1.43679e-05	0.0724907	269	11.6898	0.446303		Ca6pos17382712.1	6	17382712	1.08158e-07	0.1171	269	-10.0722	1.06275
	Ca4pos19410981.1	4	19410981	8.12413e-06	0.381041	269	-4.2239	0.252079		Ca3pos18490080.1	3	18490080	0.00012345	0.0576208	269	-18.6605	1.44628		Ca5pos37273551.1	5	37273551	1.56876e-05	0.0557621	269	13.1273	0.983716		Ca6pos24234614.1	6	24234614	2.45325e-05	0.0334572	269	20.5422	1.02826
	Ca5pos3834038.1	5	3834038	7.43389e-06	0.0780669	269	-3.99679	0.149363		Ca4pos21069767.1	4	21069767	3.24828e-05	0.0390335	269	27.156	1.08227		Ca5pos37273553.1	5	37273553	1.67641e-05	0.0576208	269	12.8861	0		Ca6pos33234535.1	6	33234535	1.06211e-05	0.249071	269	-9.54089	1.89594
	Ca5pos46549190.1	5	46549190	8.47043e-06	0.0836431	269	-3.56365	3.41079e-07		Ca5pos28386508.1	5	28386508	9.15179e-05	0.120818	269	15.2906	0.478214		Ca5pos37273561.1	5	37273561	3.12161e-05	0.0520446	269	13.0199	4.58013e-08		Ca6pos51131185.1	6	51131185	2.20601e-05	0.0966543	269	-16.1873	4.11852
	Ca6pos24093514.1	6	24093514	2.63758e-05	0.0520446	269	4.19565	0		Ca6pos5644587.1	6	5644587	5.76752e-05	0.0873606	269	18.6831	0.417102		Ca5pos47740156.1	5	47740156	1.53767e-05	0.486989	269	4.45886	0.923499		Ca6pos56506889.1	6	56506889	7.10896e-17	0.360595	269	-10.9753	1.1714
	Ca6pos28350598.1	6	28350598	3.40168e-05	0.0966543	269	2.96943	1.6011e-08		Ca6pos12877557.1	6	12877557	2.67499e-05	0.0724907	269	20.8923	1.59498		Ca6pos14136381.1	6	14136381	8.0923e-06	0.0743494	269	11.9143	0.583918		Ca7pos11736951.1	7	11736951	8.98963e-07	0.098513	269	-11.6121	1.67074
	Ca6pos53644742.1	6	53644742	3.25545e-05	0.0892193	269	3.66918	1.13621		Ca6pos55771020.1	6	55771020	4.62004e-05	0.0371747	269	27.2917	0.569663		Ca6pos53304572.1	6	53304572	1.0858e-05	0.0576208	269	13.8263	0.926491		Ca7pos20239992.1	7	20239992	3.59015e-08	0.0873606	269	-15.8676	0.635895
	Ca7pos27650319.1	7	27650319	4.42004e-05	0.0371747	269	-4.93058	0.131156		Ca7pos28121222.1	7	28121222	0.000114165	0.453532	269	-8.37979	0.0761951		Ca7pos39826886.1	7	39826886	1.68862e-05	0.120818	269	-9.39897	0.743386		Ca7pos22466721.1	7	22466721	3.61223e-06	0.355019	269	13.4767	0.246306
	Ca7pos47164247.1	7	47164247	1.3357e-05	0.0855019	269	3.72392	1.00033		Ca8pos13398907.1	8	13398907	7.80501e-05	0.172862	269	-11.8146	0.277376		Ca8pos14359546.1	8	14359546	2.85602e-05	0.459108	269	-5.84928	0.632188		Ca7pos42498874.1	7	42498874	4.36474e-05	0.0390335	269	18.6498	0.836956
	Ca8pos13311157.1	8	13311157	1.16836e-05	0.0724907	269	-5.06544	1.54775		Ca8pos16150428.1	8	16150428	5.57918e-05	0.154275	269	12.0884	0.490937		Ca8pos14366900.1	8	14366900	2.39312e-05	0.453532	269	-5.84293	0.719082		Ca7pos45634614.1	7	45634614	6.74255e-08	0.434944	269	-20.1139	0.00169612
	MLM
	Location 1									Location 2
	SNP	Chromosome	Position	P.value	maf	nobs	effect	PVE(%)		SNP	Chromosome	Position	P.value	maf	nobs	effect	PVE(%)
	Ca1pos36712513.1	1	36712513	8.15574e-06	0.496283	269	12.4998	2.01638		Ca1pos329469.1	1	329469	9.96892e-05	0.063197	269	19.1743	0.190994
	Ca1pos36716578.1	1	36716578	4.96463e-05	0.392193	269	-4.10159	0.659664		Ca1pos28268223.1	1	28268223	4.43872e-05	0.1171	269	-15.9234	0.0369101
	Ca1pos45295081.1	1	45295081	2.45015e-05	0.0687732	269	5.07138	0.266138		Ca2pos17919918.1	2	17919918	9.52401e-05	0.0743494	269	20.0786	0.751379
	Ca2pos11422406.1	2	11422406	5.00005e-05	0.0334572	269	6.74257	0.90105		Ca2pos20417294.1	2	20417294	0.000109417	0.13197	269	13.8797	0.145294
	Ca2pos11422414.1	2	11422414	7.2937e-05	0.063197	269	3.61898	0.138763		Ca2pos20563121.1	2	20563121	0.000105927	0.0650558	269	21.3293	0.428387
	Ca3pos23530375.1	3	23530375	5.78399e-05	0.0762082	269	-4.40355	0.0243593		Ca3pos8306330.1	3	8306330	9.98693e-05	0.0334572	269	28.2932	0.401822
	Ca3pos23540071.1	3	23540071	3.93543e-05	0.0892193	269	4.12366	0		Ca3pos12539140.1	3	12539140	0.000101177	0.0669145	269	-19.0518	1.19273
	Ca4pos24479189.1	4	24479189	4.37978e-05	0.421933	269	4.68068	0.0462553		Ca3pos18487224.1	3	18487224	6.57224e-05	0.0539033	269	-19.8181	3.45727e-09
	Ca4pos24503958.1	4	24503958	3.41772e-05	0.184015	269	-2.60145	0.389582		Ca4pos22817813.1	4	22817813	6.75078e-05	0.239777	269	-11.0976	0
	Ca4pos38830174.1	4	38830174	9.30232e-05	0.141264	269	-3.01239	0.105013		Ca4pos30018925.1	4	30018925	6.34072e-05	0.17658	269	-13.2147	1.23706
	Ca5pos3834038.1	5	3834038	3.2262e-05	0.0780669	269	-3.86257	0.136312		Ca4pos30173457.1	4	30173457	9.62919e-05	0.22119	269	-12.2002	0.0627735
	Ca5pos13855141.1	5	13855141	5.35123e-05	0.0947955	269	4.33983	0		Ca4pos30965279.1	4	30965279	4.10547e-05	0.152416	269	-14.1116	0.286052
	Ca5pos30670011.1	5	30670011	5.69122e-05	0.126394	269	-2.7506	9.13394		Ca4pos37092872.1	4	37092872	8.22992e-05	0.0966543	269	18.6466	9.71736e-05
	Ca5pos46139443.1	5	46139443	8.05326e-05	0.0762082	269	-3.4442	0.124421		Ca5pos38006631.1	5	38006631	4.11549e-05	0.0650558	269	-18.9823	0.0689569
	Ca5pos46549190.1	5	46549190	1.34496e-05	0.0836431	269	-3.63626	0.245253		Ca6pos12877557.1	6	12877557	5.59351e-05	0.0724907	269	20.7695	0.673702
	Ca6pos51603694.1	6	51603694	1.67318e-05	0.113383	269	4.25016	0.705797		Ca6pos12883337.1	6	12883337	9.72515e-05	0.135688	269	13.3604	1.01953
	Ca7pos27650319.1	7	27650319	8.87533e-05	0.0371747	269	-4.89157	0.674516		Ca6pos55771020.1	6	55771020	8.07238e-05	0.0371747	269	27.2916	0.437479
	Ca7pos37922644.1	7	37922644	6.3895e-05	0.0799257	269	-4.58941	1.67297		Ca7pos26157365.1	7	26157365	4.85836e-05	0.0855019	269	19.5671	2.25007
	Ca8pos1067229.1	8	1067229	4.87589e-05	0.109665	269	3.28642	0.238569		Ca8pos15203686.1	8	15203686	9.26841e-05	0.0650558	269	21.0959	0.613517
	Ca8pos7948046.1	8	7948046	8.60889e-05	0.481413	269	7.23034	0.154795		Ca8pos15203690.1	8	15203690	9.26841e-05	0.0650558	269	21.0959	0.332849

## Sheet: Sheet7
		Supplementary Table 8 : List of the MTAs identified for NOS for association panel
	Blink
	Location 1									Location 2									Location 3										Location 4
	SNP	Chromosome	Position	P.value	maf	nobs	effect	PVE(%)		SNP	Chromosome	Position	P.value	maf	nobs	effect	PVE(%)		SNP	Chromosome	Position	P.value	maf	nobs	effect	PVE(%)			SNP	Chromosome	Position	P.value	maf	nobs	effect	PVE(%)
	Ca1pos8737036.1	1	8737036	1.4612e-05	0.13197	269	NA	0.36838		Ca1pos22361885.1	1	22361885	5.89867e-05	0.0408922	269	NA	0.214535		Ca1pos8737036.1	1	8737036	1.46e-05	0.13197	269	NA	0.36838			Ca2pos9776835.1	2	9776835	2.8785e-06	0.457249	269	NA	0.345495
	Ca1pos8737037.1	1	8737037	1.4612e-05	0.13197	269	NA	0.851671		Ca1pos24510372.1	1	24510372	3.40377e-05	0.070632	269	NA	0		Ca1pos8737037.1	1	8737037	1.46e-05	0.13197	269	NA	0.851671			Ca2pos21262735.1	2	21262735	2.27211e-05	0.226766	269	NA	0.154203
	Ca1pos8820515.1	1	8820515	4.40805e-05	0.130112	269	NA	0.113898		Ca1pos28268223.1	1	28268223	3.00676e-05	0.1171	269	NA	0		Ca1pos8820515.1	1	8820515	4.41e-05	0.130112	269	NA	0.113898			Ca2pos33959208.1	2	33959208	1.91873e-05	0.144981	269	NA	2.59573
	Ca1pos14062422.1	1	14062422	3.49806e-06	0.195167	269	NA	0.135688		Ca1pos34539643.1	1	34539643	0.000125135	0.0446097	269	NA	5.7229e-10		Ca1pos14062422.1	1	14062422	3.5e-06	0.195167	269	NA	0.135688			Ca3pos10682303.1	3	10682303	2.97934e-05	0.412639	269	NA	0.192489
	Ca1pos14070458.1	1	14070458	5.92491e-06	0.171004	269	NA	0.426954		Ca2pos20417294.1	2	20417294	1.48765e-05	0.13197	269	NA	0.427476		Ca1pos14070458.1	1	14070458	5.92e-06	0.171004	269	NA	0.426954			Ca3pos10682304.1	3	10682304	2.97934e-05	0.29368	269	NA	0.877896
	Ca1pos46718466.1	1	46718466	3.86527e-05	0.115242	269	NA	0		Ca3pos12539140.1	3	12539140	0.000110496	0.0669145	269	NA	0.552232		Ca1pos46718466.1	1	46718466	3.87e-05	0.115242	269	NA	0			Ca4pos27142092.1	4	27142092	4.69367e-06	0.3829	269	NA	0.678659
	Ca2pos11422406.1	2	11422406	2.13379e-05	0.0334572	269	NA	0.0132713		Ca3pos13511310.1	3	13511310	0.000119527	0.0855019	269	NA	0.337417		Ca2pos11422406.1	2	11422406	2.13e-05	0.0334572	269	NA	0.0132713			Ca5pos3122107.1	5	3122107	9.96835e-06	0.282528	269	NA	1.08412
	Ca2pos11422414.1	2	11422414	3.55197e-05	0.063197	269	NA	0.391117		Ca3pos16804642.1	3	16804642	6.19058e-05	0.0650558	269	NA	0.545205		Ca2pos11422414.1	2	11422414	3.55e-05	0.063197	269	NA	0.391117			Ca5pos6756519.1	5	6756519	2.25093e-05	0.421933	269	NA	1.2223
	Ca3pos3042321.1	3	3042321	3.85889e-05	0.098513	269	NA	0		Ca4pos30041514.1	4	30041514	9.17094e-05	0.16171	269	NA	0.701953		Ca3pos3042321.1	3	3042321	3.86e-05	0.098513	269	NA	0			Ca5pos10836268.1	5	10836268	1.77511e-06	0.444238	269	NA	0.619406
	Ca3pos39844991.1	3	39844991	9.3957e-06	0.265799	269	NA	0.150232		Ca4pos30965279.1	4	30965279	8.50213e-05	0.152416	269	NA	0		Ca3pos39844991.1	3	39844991	9.4e-06	0.265799	269	NA	0.150232			Ca5pos23545065.1	5	23545065	1.83067e-05	0.477695	269	NA	0.457139
	Ca3pos39885397.1	3	39885397	1.25868e-05	0.314126	269	NA	0.277588		Ca5pos564209.1	5	564209	3.4553e-05	0.269517	269	NA	1.21999		Ca3pos39885397.1	3	39885397	1.26e-05	0.314126	269	NA	0.277588			Ca5pos24452364.1	5	24452364	2.46315e-05	0.0966543	269	NA	0.246823
	Ca4pos19410981.1	4	19410981	8.00133e-06	0.381041	269	NA	0.254258		Ca5pos1868667.1	5	1868667	6.45603e-05	0.185874	269	NA	0.369113		Ca4pos19410981.1	4	19410981	8e-06	0.381041	269	NA	0.254258			Ca5pos25785219.1	5	25785219	1.46545e-06	0.143123	269	NA	0.0567404
	Ca5pos3834038.1	5	3834038	7.48518e-06	0.0780669	269	NA	0.149325		Ca5pos1886067.1	5	1886067	9.37854e-05	0.178439	269	NA	0		Ca5pos3834038.1	5	3834038	7.49e-06	0.0780669	269	NA	0.149325			Ca6pos2628950.1	6	2628950	3.24191e-05	0.107807	269	NA	0
	Ca5pos46549190.1	5	46549190	8.45765e-06	0.0836431	269	NA	4.00132e-06		Ca5pos6772781.1	5	6772781	7.54346e-05	0.414498	269	NA	0.356727		Ca5pos46549190.1	5	46549190	8.46e-06	0.0836431	269	NA	4e-06			Ca6pos11791645.1	6	11791645	4.19295e-07	0.250929	269	NA	0.186082
	Ca6pos24093514.1	6	24093514	2.61024e-05	0.0520446	269	NA	0		Ca7pos28121222.1	7	28121222	6.03682e-05	0.453532	269	NA	0.457642		Ca6pos24093514.1	6	24093514	2.61e-05	0.0520446	269	NA	0			Ca6pos33234535.1	6	33234535	1.62206e-06	0.249071	269	NA	0.0642002
	Ca6pos28350598.1	6	28350598	3.4398e-05	0.0966543	269	NA	0		Ca7pos44564792.1	7	44564792	0.000129744	0.0594796	269	NA	0.890552		Ca6pos28350598.1	6	28350598	3.44e-05	0.0966543	269	NA	0			Ca6pos43035633.1	6	43035633	7.27947e-06	0.447955	269	NA	0.000338948
	Ca6pos53644742.1	6	53644742	3.19634e-05	0.0892193	269	NA	1.14439		Ca8pos12997602.1	8	12997602	9.39009e-05	0.0799257	269	NA	0.481338		Ca6pos53644742.1	6	53644742	3.2e-05	0.0892193	269	NA	1.14439			Ca6pos56506889.1	6	56506889	4.41948e-07	0.360595	269	NA	0.0797635
	Ca7pos27650319.1	7	27650319	4.4461e-05	0.0371747	269	NA	0.129011		Ca8pos13332627.1	8	13332627	0.000108511	0.204461	269	NA	0.372624		Ca7pos27650319.1	7	27650319	4.45e-05	0.0371747	269	NA	0.129011			Ca7pos3222695.1	7	3222695	1.68576e-05	0.0966543	269	NA	0.429108
	Ca7pos47164247.1	7	47164247	1.3472e-05	0.0855019	269	NA	1.00345		Ca8pos13398907.1	8	13398907	7.614e-05	0.172862	269	NA	0.450746		Ca7pos47164247.1	7	47164247	1.35e-05	0.0855019	269	NA	1.00345			Ca7pos26484947.1	7	26484947	2.33278e-05	0.472119	269	NA	0.00399705
	Ca8pos13311157.1	8	13311157	1.14706e-05	0.0724907	269	NA	1.50529		Ca8pos16150428.1	8	16150428	6.51387e-05	0.154275	269	NA	0.395159		Ca8pos13311157.1	8	13311157	1.15e-05	0.0724907	269	NA	1.50529			Ca7pos41894194.1	7	41894194	2.97641e-05	0.423792	269	NA	0
	FarmCPU
	Location 1									Location 2									Location 3										Location 4
	SNP	Chromosome	Position	P.value	maf	nobs	effect	PVE(%)		SNP	Chromosome	Position	P.value	maf	nobs	effect	PVE(%)		SNP	Chromosome	Position	P.value	maf	nobs	effect	PVE(%)			SNP	Chromosome	Position	P.value	maf	nobs	effect	PVE(%)
	Ca1pos8737036.1	1	8737036	1.46478e-05	0.13197	269	3.6462	0.36838		Ca1pos22361885.1	1	22361885	5.91085e-05	0.0408922	269	-19.4831	0.214535		Ca1pos28943779.1	1	28943779	4.55801e-06	0.498141	269	-33.748	1.63126			Ca2pos9776835.1	2	9776835	2.88942e-06	0.457249	269	-30.6363	0.345495
	Ca1pos8737037.1	1	8737037	1.46478e-05	0.13197	269	3.6462	0.851671		Ca1pos24510372.1	1	24510372	3.41119e-05	0.070632	269	17.059	0		Ca3pos9720010.1	3	9720010	1.33797e-06	0.0408922	269	7.59692	1.34436			Ca2pos21262735.1	2	21262735	2.27933e-05	0.226766	269	15.6105	0.154203
	Ca1pos8820515.1	1	8820515	4.41779e-05	0.130112	269	3.43327	0.113898		Ca1pos28268223.1	1	28268223	3.0134e-05	0.1171	269	-14.1278	0		Ca3pos19977000.1	3	19977000	3.18511e-05	0.0576208	269	5.13846	7.04823			Ca2pos33959208.1	2	33959208	1.92492e-05	0.144981	269	17.511	2.59573
	Ca1pos14062422.1	1	14062422	3.50774e-06	0.195167	269	3.27521	0.135688		Ca1pos34539643.1	1	34539643	0.000125373	0.0446097	269	-18.0468	5.7229e-10		Ca4pos27656718.1	4	27656718	4.31123e-06	0.185874	269	-4.44549	3.76603			Ca3pos10682303.1	3	10682303	2.98857e-05	0.412639	269	-7.85356	0.192489
	Ca1pos14070458.1	1	14070458	5.94061e-06	0.171004	269	3.17426	0.426954		Ca2pos20417294.1	2	20417294	1.49116e-05	0.13197	269	13.7479	0.427476		Ca4pos33619084.1	4	33619084	5.35154e-08	0.457249	269	-8.52792	3.00244			Ca3pos10682304.1	3	10682304	2.98857e-05	0.29368	269	-15.7071	0.877896
	Ca1pos46718466.1	1	46718466	3.87391e-05	0.115242	269	3.56045	0		Ca3pos12539140.1	3	12539140	0.00011071	0.0669145	269	-16.6515	0.552232		Ca5pos3880027.1	5	3880027	1.0542e-08	0.0910781	269	5.84541	0.168857			Ca4pos27142092.1	4	27142092	4.71079e-06	0.3829	269	-20.4207	0.678659
	Ca2pos11422406.1	2	11422406	2.13884e-05	0.0334572	269	7.6477	0.0132713		Ca3pos13511310.1	3	13511310	0.000119756	0.0855019	269	14.301	0.337417		Ca5pos6039480.1	5	6039480	4.03634e-05	0.302974	269	2.43184	1.78586			Ca5pos3122107.1	5	3122107	1.00025e-05	0.282528	269	-19.108	1.08412
	Ca2pos11422414.1	2	11422414	3.55998e-05	0.063197	269	4.08965	0.391117		Ca3pos16804642.1	3	16804642	6.2033e-05	0.0650558	269	16.904	0.545205		Ca5pos12633911.1	5	12633911	1.10336e-08	0.0929368	269	7.41934	0.997118			Ca5pos6756519.1	5	6756519	2.25809e-05	0.421933	269	-21.549	1.2223
	Ca3pos3042321.1	3	3042321	3.86752e-05	0.098513	269	3.74232	0		Ca4pos30041514.1	4	30041514	9.18902e-05	0.16171	269	12.7514	0.701953		Ca5pos14073956.1	5	14073956	7.21324e-06	0.063197	269	5.39513	0.306599			Ca5pos10836268.1	5	10836268	1.7821e-06	0.444238	269	-25.5541	0.619406
	Ca3pos39844991.1	3	39844991	9.41965e-06	0.265799	269	-2.55659	0.150232		Ca4pos30965279.1	4	30965279	8.51903e-05	0.152416	269	-12.7465	0		Ca6pos34055297.1	6	34055297	4.42741e-06	0.104089	269	-5.84176	2.10699			Ca5pos23545065.1	5	23545065	1.83661e-05	0.477695	269	28.8941	0.457139
	Ca3pos39885397.1	3	39885397	1.26181e-05	0.314126	269	2.52193	0.277588		Ca5pos564209.1	5	564209	3.46283e-05	0.269517	269	7.94015	1.21999		Ca6pos43838304.1	6	43838304	3.85976e-06	0.0743494	269	-6.8141	1.93926			Ca5pos24452364.1	5	24452364	2.47091e-05	0.0966543	269	-16.6008	0.246823
	Ca4pos19410981.1	4	19410981	8.02201e-06	0.381041	269	-4.73192	0.254258		Ca5pos1868667.1	5	1868667	6.46924e-05	0.185874	269	-13.0437	0.369113		Ca6pos43838306.1	6	43838306	4.78112e-06	0.0724907	269	-6.85833	0.00191114			Ca5pos25785219.1	5	25785219	1.4713e-06	0.143123	269	19.8993	0.0567404
	Ca5pos3834038.1	5	3834038	7.50463e-06	0.0780669	269	-4.47294	0.149325		Ca5pos1886067.1	5	1886067	9.39698e-05	0.178439	269	12.9581	0		Ca6pos45151903.1	6	45151903	2.99539e-08	0.0724907	269	-6.9027	0.259574			Ca6pos2628950.1	6	2628950	3.25187e-05	0.107807	269	-12.4089	0
	Ca5pos46549190.1	5	46549190	8.4794e-06	0.0836431	269	-3.98974	4.00132e-06		Ca5pos6772781.1	5	6772781	7.55864e-05	0.414498	269	-19.9898	0.356727		Ca6pos52557815.1	6	52557815	2.60977e-10	0.0762082	269	-7.78844	0.433781			Ca6pos11791645.1	6	11791645	4.21126e-07	0.250929	269	-25.8987	0.186082
	Ca6pos24093514.1	6	24093514	2.61631e-05	0.0520446	269	4.69949	0		Ca7pos28121222.1	7	28121222	6.04926e-05	0.453532	269	-7.82333	0.457642		Ca6pos53308624.1	6	53308624	1.74346e-11	0.0687732	269	-8.77777	0.611569			Ca6pos33234535.1	6	33234535	1.62849e-06	0.249071	269	-17.2989	0.0642002
	Ca6pos28350598.1	6	28350598	3.44758e-05	0.0966543	269	3.32223	0		Ca7pos44564792.1	7	44564792	0.00012999	0.0594796	269	18.6991	0.890552		Ca7pos6558234.1	7	6558234	3.63448e-10	0.0892193	269	5.54371	1.44919			Ca6pos43035633.1	6	43035633	7.30507e-06	0.447955	269	-26.6245	0.000338948
	Ca6pos53644742.1	6	53644742	3.20362e-05	0.0892193	269	4.11157	1.14439		Ca8pos12997602.1	8	12997602	9.40856e-05	0.0799257	269	19.6844	0.481338		Ca7pos24602215.1	7	24602215	3.12063e-07	0.0464684	269	8.12955	1.87873			Ca6pos56506889.1	6	56506889	4.43871e-07	0.360595	269	-9.58982	0.0797635
	Ca7pos27650319.1	7	27650319	4.45591e-05	0.0371747	269	-5.51789	0.129011		Ca8pos13332627.1	8	13332627	0.000108721	0.204461	269	-10.1594	0.372624		Ca7pos37411539.1	7	37411539	8.8202e-10	0.0297398	269	11.9588	0.457372			Ca7pos3222695.1	7	3222695	1.69127e-05	0.0966543	269	18.1004	0.429108
	Ca7pos47164247.1	7	47164247	1.35053e-05	0.0855019	269	4.16713	1.00345		Ca8pos13398907.1	8	13398907	7.62932e-05	0.172862	269	-10.6373	0.450746		Ca8pos4768937.1	8	4768937	3.78949e-07	0.0817844	269	-6.48088	2.64701			Ca7pos26484947.1	7	26484947	2.34017e-05	0.472119	269	-7.85185	0.00399705
	Ca8pos13311157.1	8	13311157	1.14993e-05	0.0724907	269	-5.67567	1.50529		Ca8pos16150428.1	8	16150428	6.52718e-05	0.154275	269	10.7716	0.395159		Ca8pos8473131.1	8	8473131	1.01284e-05	0.165428	269	-4.61173	17.1759			Ca7pos41894194.1	7	41894194	2.98563e-05	0.423792	269	-9.17255	0
	MLM
	Location 1									Location 2
	SNP	Chromosome	Position	P.value	maf	nobs	effect	PVE(%)		SNP	Chromosome	Position	P.value	maf	nobs	effect	PVE(%)
	Ca1pos36712513.1	1	36712513	8.01683e-06	0.496283	269	14.01	2.02375		Ca1pos28268223.1	1	28268223	1.66223e-05	0.1171	269	-14.6815	0.0364818
	Ca1pos36716578.1	1	36716578	4.80994e-05	0.392193	269	-4.60203	0.65637		Ca1pos44478359.1	1	44478359	2.82261e-05	0.137546	269	15.1146	0.140007
	Ca1pos45295081.1	1	45295081	2.44069e-05	0.0687732	269	5.68072	0.263698		Ca2pos19086181.1	2	19086181	4.08773e-05	0.224907	269	-10.6553	0
	Ca2pos11422406.1	2	11422406	4.98636e-05	0.0334572	269	7.55238	0.900091		Ca2pos20417294.1	2	20417294	3.72171e-06	0.13197	269	14.591	0
	Ca2pos11422414.1	2	11422414	7.29457e-05	0.063197	269	4.05291	0.141126		Ca2pos24195336.1	2	24195336	6.0149e-05	0.182156	269	-10.8804	0.153335
	Ca3pos23530375.1	3	23530375	5.7296e-05	0.0762082	269	-4.93392	0.0242009		Ca4pos24948104.1	4	24948104	5.83758e-05	0.258364	269	7.47343	0.629696
	Ca3pos23540071.1	3	23540071	3.92505e-05	0.0892193	269	4.61821	0		Ca4pos30018925.1	4	30018925	4.32944e-05	0.17658	269	-11.9004	0.321663
	Ca4pos24479189.1	4	24479189	4.32153e-05	0.421933	269	5.24584	0.0459649		Ca4pos30018933.1	4	30018933	4.97624e-05	0.17658	269	11.631	0.500422
	Ca4pos24503958.1	4	24503958	3.42798e-05	0.184015	269	-2.91238	0.389651		Ca4pos30041514.1	4	30041514	6.10544e-05	0.16171	269	12.4578	0.43437
	Ca4pos38830174.1	4	38830174	9.3049e-05	0.141264	269	-3.37305	0.106162		Ca4pos30965279.1	4	30965279	2.64831e-05	0.152416	269	-12.7263	0
	Ca5pos3834038.1	5	3834038	3.28552e-05	0.0780669	269	-4.32051	0.136985		Ca4pos37092867.1	4	37092867	3.63221e-05	0.171004	269	9.90679	0.0837771
	Ca5pos13855141.1	5	13855141	5.32029e-05	0.0947955	269	4.8619	8.0372e-10		Ca5pos1868667.1	5	1868667	2.97574e-05	0.185874	269	-13.6996	0.133808
	Ca5pos30670011.1	5	30670011	5.73425e-05	0.126394	269	-3.07852	9.15119		Ca5pos36680295.1	5	36680295	3.70509e-05	0.245353	269	13.0581	1.94604e-09
	Ca5pos46139443.1	5	46139443	8.07658e-05	0.0762082	269	-3.85563	0.123777		Ca5pos38006631.1	5	38006631	8.31113e-06	0.0650558	269	-18.1307	0.508467
	Ca5pos46549190.1	5	46549190	1.35846e-05	0.0836431	269	-4.06923	0.245778		Ca6pos12856796.1	6	12856796	5.92222e-05	0.13197	269	-12.1247	0.0186167
	Ca6pos51603694.1	6	51603694	1.67543e-05	0.113383	269	4.75954	0.706536		Ca6pos12883337.1	6	12883337	9.03067e-06	0.135688	269	13.363	0.438396
	Ca7pos27650319.1	7	27650319	8.93207e-05	0.0371747	269	-5.47519	0.674286		Ca6pos12932445.1	6	12932445	6.00843e-05	0.156134	269	12.1118	0.179593
	Ca7pos37922644.1	7	37922644	6.36096e-05	0.0799257	269	-5.14064	1.67008		Ca6pos12973483.1	6	12973483	2.71962e-05	0.133829	269	12.5495	0.0771778
	Ca8pos1067229.1	8	1067229	4.9138e-05	0.109665	269	3.67801	0.237334		Ca7pos18743555.1	7	18743555	4.65962e-05	0.0669145	269	-15.8156	0.399374
	Ca8pos7948046.1	8	7948046	8.47032e-05	0.481413	269	8.10556	0.157467		Ca7pos26157365.1	7	26157365	3.00902e-05	0.0855019	269	17.5446	0.106331

## Sheet: Sheet8
Blink model			Supplementary Table 9 : List of the MTAs idnetified for DFF for association panel
Location 1									Location 2									Location 3									Location 4
SNP	Chromosome	Position	P.value	maf	nobs	effect	PVE(%)		SNP	Chromosome	Position	P.value	maf	nobs	effect	PVE(%)		SNP	Chromosome	Position	P.value	maf	nobs	effect	PVE%)		SNP	Chromosome	Position	P.value	maf	nobs	effect	PVE(%)
Ca1pos2199880.1	1	2199880	1.16e-05	0.0576208	269	NA	0.627733		Ca1pos27008565.1	1	27008565	4.49761e-05	0.109665	269	NA	0.593639		Ca1pos2676209.1	1	2676209	2.65275e-05	0.10223	269	NA	0.103657		Ca2pos1198412.1	2	1198412	1.34829e-05	0.070632	269	NA	0.436009
Ca1pos4347674.1	1	4347674	3.01e-06	0.0371747	269	NA	0.101773		Ca1pos28046694.1	1	28046694	1.9671e-05	0.165428	269	NA	0.145313		Ca1pos10874838.1	1	10874838	1.43331e-05	0.258364	269	NA	0.135267		Ca2pos1640146.1	2	1640146	1.49159e-05	0.494424	269	NA	0.61805
Ca1pos4364973.1	1	4364973	1.38e-05	0.0446097	269	NA	0.157528		Ca1pos28450059.1	1	28450059	5.28453e-07	0.0483271	269	NA	0.115891		Ca1pos10874845.1	1	10874845	9.60031e-06	0.254647	269	NA	0.0565094		Ca3pos12432324.1	3	12432324	8.63474e-06	0.289963	269	NA	7.8668e-07
Ca1pos4373495.1	1	4373495	1.21e-05	0.0483271	269	NA	0.253199		Ca1pos37050270.1	1	37050270	1.5122e-05	0.17658	269	NA	0.386761		Ca1pos31786048.1	1	31786048	1.80487e-09	0.479554	269	NA	0		Ca3pos12432325.1	3	12432325	4.46056e-06	0.289963	269	NA	4.89362e-09
Ca1pos4393831.1	1	4393831	1.57e-05	0.0483271	269	NA	8.82e-10		Ca2pos6642359.1	2	6642359	6.19594e-06	0.492565	269	NA	0.251313		Ca3pos7182065.1	3	7182065	2.83222e-05	0.0817844	269	NA	0.509098		Ca4pos3364121.1	4	3364121	1.25299e-05	0.0501859	269	NA	1.70061
Ca1pos4695226.1	1	4695226	1.05e-05	0.0371747	269	NA	0		Ca2pos35713361.1	2	35713361	3.10011e-05	0.321561	269	NA	0.425098		Ca5pos1879818.1	5	1879818	2.32807e-05	0.351301	269	NA	0.0213034		Ca5pos3212171.1	5	3212171	5.63623e-06	0.152416	269	NA	0.301779
Ca1pos4695237.1	1	4695237	3.72e-06	0.0371747	269	NA	6.05e-07		Ca3pos10919767.1	3	10919767	2.98554e-05	0.29368	269	NA	0.327445		Ca5pos6772898.1	5	6772898	1.0967e-07	0.490706	269	NA	0.104006		Ca6pos41648087.1	6	41648087	9.70771e-07	0.386617	269	NA	0.442705
Ca1pos4707481.1	1	4707481	4.22e-06	0.0390335	269	NA	1.00495		Ca3pos10919780.1	3	10919780	3.89262e-05	0.29368	269	NA	6.25973e-08		Ca5pos8999629.1	5	8999629	4.14703e-10	0.498141	269	NA	0.113767		Ca6pos43010930.1	6	43010930	4.75254e-06	0.462825	269	NA	0.618811
Ca1pos4765829.1	1	4765829	1.28e-05	0.0334572	269	NA	0.162498		Ca3pos39612447.1	3	39612447	8.08024e-06	0.371747	269	NA	0		Ca5pos13682390.1	5	13682390	4.74233e-05	0.0501859	269	NA	0.194881		Ca6pos48048350.1	6	48048350	3.31075e-06	0.436803	269	NA	0.34196
Ca1pos4768854.1	1	4768854	2.97e-06	0.0408922	269	NA	0.317962		Ca3pos39612458.1	3	39612458	3.59277e-05	0.395911	269	NA	0.43401		Ca5pos17867951.1	5	17867951	2.91294e-09	0.492565	269	NA	0.463292		Ca6pos52780891.1	6	52780891	8.18244e-06	0.0724907	269	NA	6.33097e-07
Ca1pos4824651.1	1	4824651	6.75e-06	0.0539033	269	NA	0.196888		Ca5pos4969676.1	5	4969676	2.40074e-05	0.202602	269	NA	0.634283		Ca5pos25522976.1	5	25522976	1.65615e-05	0.163569	269	NA	0.520835		Ca6pos55771752.1	6	55771752	1.51058e-05	0.321561	269	NA	0.37444
Ca1pos4954996.1	1	4954996	1.41e-05	0.0390335	269	NA	0.0922112		Ca5pos9381174.1	5	9381174	4.13211e-05	0.0966543	269	NA	0.226179		Ca5pos38382126.1	5	38382126	9.22428e-06	0.070632	269	NA	0.387541		Ca6pos58054542.1	6	58054542	1.47176e-05	0.17658	269	NA	1.14987
Ca1pos4989118.1	1	4989118	4.21e-06	0.0446097	269	NA	0.311516		Ca6pos25457062.1	6	25457062	1.11674e-05	0.035316	269	NA	2.45448e-07		Ca6pos8442932.1	6	8442932	1.90626e-05	0.0483271	269	NA	7.38626		Ca6pos58054546.1	6	58054546	4.37666e-06	0.171004	269	NA	2.00017
Ca1pos5173195.1	1	5173195	1.06e-05	0.0501859	269	NA	0		Ca6pos25457065.1	6	25457065	1.11674e-05	0.035316	269	NA	0.113572		Ca6pos18558918.1	6	18558918	3.48101e-05	0.0483271	269	NA	0.320011		Ca6pos58054563.1	6	58054563	6.06932e-06	0.182156	269	NA	0.0714791
Ca1pos5205189.1	1	5205189	1.23e-05	0.0371747	269	NA	0.198142		Ca6pos28192679.1	6	28192679	1.3348e-05	0.384758	269	NA	3.70313e-07		Ca6pos47821883.1	6	47821883	3.98992e-05	0.0371747	269	NA	48.4323		Ca6pos58569847.1	6	58569847	9.66158e-06	0.109665	269	NA	0.922897
Ca1pos7395502.1	1	7395502	1.44e-05	0.0334572	269	NA	0		Ca6pos42413923.1	6	42413923	3.52184e-05	0.0799257	269	NA	0.31266		Ca6pos56072301.1	6	56072301	2.1082e-05	0.0855019	269	NA	5.91995		Ca7pos13030083.1	7	13030083	9.5614e-07	0.0539033	269	NA	0.192522
Ca2pos34299519.1	2	34299519	1.15e-05	0.0539033	269	NA	0.145887		Ca7pos16225558.1	7	16225558	3.98893e-05	0.1171	269	NA	5.94713		Ca7pos27271751.1	7	27271751	4.25043e-05	0.10223	269	NA	0.234464		Ca7pos19732045.1	7	19732045	1.39658e-05	0.47026	269	NA	0.429094
Ca4pos99711.1	4	99711	9.02e-06	0.0576208	269	NA	2.80795		Ca7pos21016626.1	7	21016626	2.56216e-05	0.0817844	269	NA	0.213339		Ca7pos37615621.1	7	37615621	4.33289e-05	0.200743	269	NA	6.62152		Ca7pos22459305.1	7	22459305	1.26411e-05	0.299257	269	NA	0.380056
Ca5pos4177794.1	5	4177794	1.26e-05	0.204461	269	NA	1.14e-08		Ca8pos10375679.1	8	10375679	2.84827e-05	0.468401	269	NA	0.883531		Ca7pos38251515.1	7	38251515	3.30426e-05	0.0743494	269	NA	0.139859		Ca7pos22459315.1	7	22459315	4.23245e-06	0.295539	269	NA	6.09932e-10
Ca5pos4177803.1	5	4177803	3.98e-06	0.200743	269	NA	1.11745		Ca8pos10375686.1	8	10375686	1.86482e-06	0.473978	269	NA	0.279994		Ca7pos38453618.1	7	38453618	3.59218e-05	0.0836431	269	NA	3.93255e-06		Ca7pos43994019.1	7	43994019	8.38402e-06	0.429368	269	NA	0.462097
FarmCPU
Location 1									Location 2									Location 3									Location 4
SNP	Chromosome	Position	P.value	maf	nobs	effect	PVE(%)		SNP	Chromosome	Position	P.value	maf	nobs	effect	PVE(%)		SNP	Chromosome	Position	P.value	maf	nobs	effect	PVE(%)		SNP	Chromosome	Position	P.value	maf	nobs	effect	PVE(%)
Ca1pos8737036.1	1	8737036	1.46478e-05	0.13197	269	3.6462	0.36838		Ca1pos27008565.1	1	27008565	4.50555e-05	0.109665	269	-1.01023	0.593639		Ca1pos19240384.1	1	19240384	3.9385e-06	0.0520446	269	1.49052	0.900115		Ca2pos1198412.1	2	1198412	1.35109e-05	0.070632	269	-2.19638	0.436009
Ca1pos8737037.1	1	8737037	1.46478e-05	0.13197	269	3.6462	0.851671		Ca1pos28046694.1	1	28046694	1.97086e-05	0.165428	269	-1.06587	0.145313		Ca1pos31786048.1	1	31786048	3.81998e-06	0.479554	269	-2.72164	0		Ca2pos1640146.1	2	1640146	1.49466e-05	0.494424	269	4.13816	0.61805
Ca1pos8820515.1	1	8820515	4.41779e-05	0.130112	269	3.43327	0.113898		Ca1pos28450059.1	1	28450059	5.298e-07	0.0483271	269	-1.94855	0.115891		Ca1pos40869901.1	1	40869901	5.93408e-07	0.0315985	269	2.3764	2.35219		Ca3pos12432324.1	3	12432324	8.65339e-06	0.289963	269	1.67805	7.8668e-07
Ca1pos14062422.1	1	14062422	3.50774e-06	0.195167	269	3.27521	0.135688		Ca1pos37050270.1	1	37050270	1.51516e-05	0.17658	269	-1.05006	0.386761		Ca1pos45343194.1	1	45343194	8.7197e-07	0.490706	269	2.45279	0		Ca3pos12432325.1	3	12432325	4.47074e-06	0.289963	269	1.71989	4.89362e-09
Ca1pos14070458.1	1	14070458	5.94061e-06	0.171004	269	3.17426	0.426954		Ca2pos6642359.1	2	6642359	6.20904e-06	0.492565	269	4.29832	0.251313		Ca2pos6659259.1	2	6659259	6.02149e-06	0.433086	269	-1.56277	0.709107		Ca4pos3364121.1	4	3364121	1.25561e-05	0.0501859	269	-2.14694	1.70061
Ca1pos46718466.1	1	46718466	3.87391e-05	0.115242	269	3.56045	0		Ca2pos35713361.1	2	35713361	3.10579e-05	0.321561	269	-0.647523	0.425098		Ca3pos487615.1	3	487615	4.98862e-06	0.0594796	269	1.6306	0		Ca5pos3212171.1	5	3212171	5.64885e-06	0.152416	269	-1.7377	0.301779
Ca2pos11422406.1	2	11422406	2.13884e-05	0.0334572	269	7.6477	0.0132713		Ca3pos10919767.1	3	10919767	2.99103e-05	0.29368	269	-0.985554	0.327445		Ca3pos6332467.1	3	6332467	1.99731e-06	0.0687732	269	1.58885	0.231642		Ca6pos41648087.1	6	41648087	9.73261e-07	0.386617	269	1.91703	0.442705
Ca2pos11422414.1	2	11422414	3.55998e-05	0.063197	269	4.08965	0.391117		Ca3pos10919780.1	3	10919780	3.89959e-05	0.29368	269	-0.967342	6.25973e-08		Ca3pos38158848.1	3	38158848	8.21836e-07	0.0817844	269	1.26067	0.67022		Ca6pos43010930.1	6	43010930	4.76333e-06	0.462825	269	2.89948	0.618811
Ca3pos3042321.1	3	3042321	3.86752e-05	0.098513	269	3.74232	0		Ca3pos39612447.1	3	39612447	8.09695e-06	0.371747	269	1.23222	0		Ca3pos38280475.1	3	38280475	2.82213e-06	0.070632	269	-1.20187	12.4464		Ca6pos48048350.1	6	48048350	3.31849e-06	0.436803	269	2.48441	0.34196
Ca3pos39844991.1	3	39844991	9.41965e-06	0.265799	269	-2.55659	0.150232		Ca3pos39612458.1	3	39612458	3.59925e-05	0.395911	269	1.25209	0.43401		Ca4pos2032663.1	4	2032663	5.02333e-07	0.494424	269	-5.48883	1.39373		Ca6pos52780891.1	6	52780891	8.20019e-06	0.0724907	269	2.21395	6.33097e-07
Ca3pos39885397.1	3	39885397	1.26181e-05	0.314126	269	2.52193	0.277588		Ca5pos4969676.1	5	4969676	2.40524e-05	0.202602	269	0.615597	0.634283		Ca5pos6772898.1	5	6772898	1.46681e-08	0.490706	269	-4.81622	0.758109		Ca6pos55771752.1	6	55771752	1.51368e-05	0.321561	269	-1.58484	0.37444
Ca4pos19410981.1	4	19410981	8.02201e-06	0.381041	269	-4.73192	0.254258		Ca5pos9381174.1	5	9381174	4.13947e-05	0.0966543	269	-1.17299	0.226179		Ca5pos8999629.1	5	8999629	1.49944e-06	0.498141	269	-9.10207	10.8317		Ca6pos58054542.1	6	58054542	1.47479e-05	0.17658	269	1.38863	1.14987
Ca5pos3834038.1	5	3834038	7.50463e-06	0.0780669	269	-4.47294	0.149325		Ca6pos25457062.1	6	25457062	1.11898e-05	0.035316	269	-1.98082	2.45448e-07		Ca5pos8999636.1	5	8999636	1.49944e-06	0.498141	269	-9.10207	17.5485		Ca6pos58054546.1	6	58054546	4.38667e-06	0.171004	269	-1.49094	2.00017
Ca5pos46549190.1	5	46549190	8.4794e-06	0.0836431	269	-3.98974	4.00132e-06		Ca6pos25457065.1	6	25457065	1.11898e-05	0.035316	269	-1.98082	0.113572		Ca5pos13682390.1	5	13682390	6.08029e-06	0.0501859	269	1.7314	1.80609		Ca6pos58054563.1	6	58054563	6.08282e-06	0.182156	269	1.44964	0.0714791
Ca6pos24093514.1	6	24093514	2.61631e-05	0.0520446	269	4.69949	0		Ca6pos28192679.1	6	28192679	1.33745e-05	0.384758	269	1.16742	3.70313e-07		Ca5pos17867498.1	5	17867498	1.42492e-07	0.490706	269	-4.48612	1.96212e-07		Ca6pos58569847.1	6	58569847	9.68225e-06	0.109665	269	-1.49317	0.922897
Ca6pos28350598.1	6	28350598	3.44758e-05	0.0966543	269	3.32223	0		Ca6pos42413923.1	6	42413923	3.52821e-05	0.0799257	269	-1.1854	0.31266		Ca5pos17867951.1	5	17867951	1.5086e-08	0.492565	269	-5.33262	0.424315		Ca7pos13030083.1	7	13030083	9.58595e-07	0.0539033	269	2.77244	0.192522
Ca6pos53644742.1	6	53644742	3.20362e-05	0.0892193	269	4.11157	1.14439		Ca7pos16225558.1	7	16225558	3.99605e-05	0.1171	269	-0.990808	5.94713		Ca6pos8442932.1	6	8442932	4.61815e-06	0.0483271	269	1.81893	0.316764		Ca7pos19732045.1	7	19732045	1.39947e-05	0.47026	269	-3.24357	0.429094
Ca7pos27650319.1	7	27650319	4.45591e-05	0.0371747	269	-5.51789	0.129011		Ca7pos21016626.1	7	21016626	2.56694e-05	0.0817844	269	1.36349	0.213339		Ca6pos38939455.1	6	38939455	5.80382e-06	0.139405	269	1.17263	0.268017		Ca7pos22459305.1	7	22459305	1.26675e-05	0.299257	269	1.62006	0.380056
Ca7pos47164247.1	7	47164247	1.35053e-05	0.0855019	269	4.16713	1.00345		Ca8pos10375679.1	8	10375679	2.85353e-05	0.468401	269	2.00809	0.883531		Ca7pos39621567.1	7	39621567	3.84521e-06	0.0446097	269	1.86539	1.12688		Ca7pos22459315.1	7	22459315	4.24215e-06	0.295539	269	1.6878	6.09932e-10
Ca8pos13311157.1	8	13311157	1.14993e-05	0.0724907	269	-5.67567	1.50529		Ca8pos10375686.1	8	10375686	1.86916e-06	0.473978	269	2.5033	0.279994		Ca7pos47410778.1	7	47410778	2.77013e-06	0.0501859	269	-1.55921	0.862262		Ca7pos43994019.1	7	43994019	8.40217e-06	0.429368	269	2.25658	0.462097
MLM
Location 1									Location 2									Location 3									Location 4
SNP	Chromosome	Position	P.value	maf	nobs	effect	PVE(%)		SNP	Chromosome	Position	P.value	maf	nobs	effect	PVE(%)		SNP	Chromosome	Position	P.value	maf	nobs	effect	PVE(%)		SNP	Chromosome	Position	P.value	maf	nobs	effect	PVE(%)
Ca1pos36712513.1	1	36712513	8.01683e-06	0.496283	269	14.01	2.02375		Ca1pos18235865.1	1	18235865	0.00014465	0.0910781	269	1.04215	0.146438		Ca1pos24610010.1	1	24610010	7.50197e-05	0.282528	269	1.56221	0.68311		Ca1pos24610010.1	1	24610010	7.50197e-05	0.282528	269	1.56221	0.68311
Ca1pos36716578.1	1	36716578	4.80994e-05	0.392193	269	-4.60203	0.65637		Ca1pos18242539.1	1	18242539	0.000143863	0.0817844	269	-1.07507	0		Ca2pos1198412.1	2	1198412	5.97539e-05	0.070632	269	-2.24638	1.10589e-09		Ca2pos1198412.1	2	1198412	5.97539e-05	0.070632	269	-2.24638	1.10589e-09
Ca1pos45295081.1	1	45295081	2.44069e-05	0.0687732	269	5.68072	0.263698		Ca1pos26110444.1	1	26110444	0.000164134	0.0539033	269	-1.52453	0.105679		Ca2pos8664225.1	2	8664225	8.93017e-05	0.20632	269	-1.46944	0.83579		Ca2pos8664225.1	2	8664225	8.93017e-05	0.20632	269	-1.46944	0.83579
Ca2pos11422406.1	2	11422406	4.98636e-05	0.0334572	269	7.55238	0.900091		Ca1pos27008565.1	1	27008565	0.00017767	0.109665	269	-1.0118	0.411182		Ca3pos12432325.1	3	12432325	8.58655e-05	0.289963	269	1.59812	1.74667		Ca3pos12432325.1	3	12432325	8.58655e-05	0.289963	269	1.59812	1.74667
Ca2pos11422414.1	2	11422414	7.29457e-05	0.063197	269	4.05291	0.141126		Ca1pos28046694.1	1	28046694	8.57549e-05	0.165428	269	-1.0632	0		Ca3pos30297117.1	3	30297117	7.05328e-05	0.388476	269	-1.8378	0		Ca3pos30297117.1	3	30297117	7.05328e-05	0.388476	269	-1.8378	0
Ca3pos23530375.1	3	23530375	5.7296e-05	0.0762082	269	-4.93392	0.0242009		Ca1pos28450059.1	1	28450059	5.22882e-06	0.0483271	269	-1.94572	0.409759		Ca5pos10957198.1	5	10957198	5.43097e-05	0.369888	269	1.77486	0.323196		Ca5pos10957198.1	5	10957198	5.43097e-05	0.369888	269	1.77486	0.323196
Ca3pos23540071.1	3	23540071	3.92505e-05	0.0892193	269	4.61821	0		Ca2pos6642359.1	2	6642359	3.49001e-05	0.492565	269	4.29837	0.487198		Ca5pos34659907.1	5	34659907	0.000129573	0.0483271	269	-1.98009	0.549183		Ca5pos34659907.1	5	34659907	0.000129573	0.0483271	269	-1.98009	0.549183
Ca4pos24479189.1	4	24479189	4.32153e-05	0.421933	269	5.24584	0.0459649		Ca3pos10919767.1	3	10919767	3.01975e-05	0.29368	269	-1.0695	0.215775		Ca6pos16026122.1	6	16026122	8.45138e-05	0.319703	269	1.59107	1.46239		Ca6pos16026122.1	6	16026122	8.45138e-05	0.319703	269	1.59107	1.46239
Ca4pos24503958.1	4	24503958	3.42798e-05	0.184015	269	-2.91238	0.389651		Ca5pos4969676.1	5	4969676	8.06126e-05	0.202602	269	0.625623	1.4605e-09		Ca6pos41345425.1	6	41345425	9.10862e-05	0.0724907	269	2.15474	0.0851878		Ca6pos41345425.1	6	41345425	9.10862e-05	0.0724907	269	2.15474	0.0851878
Ca4pos38830174.1	4	38830174	9.3049e-05	0.141264	269	-3.37305	0.106162		Ca6pos13365602.1	6	13365602	0.000127965	0.17658	269	0.77211	0.261623		Ca6pos41648087.1	6	41648087	0.00011121	0.386617	269	1.66989	0.572638		Ca6pos41648087.1	6	41648087	0.00011121	0.386617	269	1.66989	0.572638
Ca5pos3834038.1	5	3834038	3.28552e-05	0.0780669	269	-4.32051	0.136985		Ca6pos13391551.1	6	13391551	0.000144578	0.0947955	269	1.19647	1.23021		Ca6pos41972856.1	6	41972856	7.29608e-05	0.163569	269	1.05056	0.283642		Ca6pos41972856.1	6	41972856	7.29608e-05	0.163569	269	1.05056	0.283642
Ca5pos13855141.1	5	13855141	5.32029e-05	0.0947955	269	4.8619	8.0372e-10		Ca6pos15403388.1	6	15403388	0.000190299	0.10223	269	1.00149	1.10293		Ca6pos41972896.1	6	41972896	8.4994e-06	0.0817844	269	2.32168	0.380258		Ca6pos41972896.1	6	41972896	8.4994e-06	0.0817844	269	2.32168	0.380258
Ca5pos30670011.1	5	30670011	5.73425e-05	0.126394	269	-3.07852	9.15119		Ca6pos25457062.1	6	25457062	8.15886e-05	0.035316	269	-1.93563	0.543281		Ca6pos45018264.1	6	45018264	0.000120122	0.460967	269	-2.84214	0.16646		Ca6pos45018264.1	6	45018264	0.000120122	0.460967	269	-2.84214	0.16646
Ca5pos46139443.1	5	46139443	8.07658e-05	0.0762082	269	-3.85563	0.123777		Ca6pos25457065.1	6	25457065	8.15886e-05	0.035316	269	-1.93563	0.866584		Ca6pos48048350.1	6	48048350	8.38495e-05	0.436803	269	2.32519	0.0640429		Ca6pos48048350.1	6	48048350	8.38495e-05	0.436803	269	2.32519	0.0640429
Ca5pos46549190.1	5	46549190	1.35846e-05	0.0836431	269	-4.06923	0.245778		Ca6pos28192679.1	6	28192679	9.67118e-06	0.384758	269	1.29927	0.518009		Ca6pos52780891.1	6	52780891	5.15013e-05	0.0724907	269	2.22119	0.0816608		Ca6pos52780891.1	6	52780891	5.15013e-05	0.0724907	269	2.22119	0.0816608
Ca6pos51603694.1	6	51603694	1.67543e-05	0.113383	269	4.75954	0.706536		Ca6pos28192693.1	6	28192693	9.61836e-05	0.381041	269	1.12711	0.130178		Ca6pos55771752.1	6	55771752	3.79929e-05	0.321561	269	-1.66569	0.24184		Ca6pos55771752.1	6	55771752	3.79929e-05	0.321561	269	-1.66569	0.24184
Ca7pos27650319.1	7	27650319	8.93207e-05	0.0371747	269	-5.47519	0.674286		Ca7pos5446527.1	7	5446527	0.000172626	0.321561	269	-0.97241	8.62579		Ca7pos13030083.1	7	13030083	5.3297e-05	0.0539033	269	2.5125	0.09846		Ca7pos13030083.1	7	13030083	5.3297e-05	0.0539033	269	2.5125	0.09846
Ca7pos37922644.1	7	37922644	6.36096e-05	0.0799257	269	-5.14064	1.67008		Ca7pos42440139.1	7	42440139	6.07039e-05	0.156134	269	-1.08728	0.20661		Ca7pos19732025.1	7	19732025	0.000132809	0.47026	269	-3.12868	0.366156		Ca7pos19732025.1	7	19732025	0.000132809	0.47026	269	-3.12868	0.366156
Ca8pos1067229.1	8	1067229	4.9138e-05	0.109665	269	3.67801	0.237334		Ca8pos5088598.1	8	5088598	1.15923e-05	0.0334572	269	-2.21868	0.298537		Ca7pos38107103.1	7	38107103	4.54703e-05	0.0483271	269	-2.60588	0.725487		Ca7pos38107103.1	7	38107103	4.54703e-05	0.0483271	269	-2.60588	0.725487
Ca8pos7948046.1	8	7948046	8.47032e-05	0.481413	269	8.10556	0.157467		Ca8pos10375686.1	8	10375686	7.00367e-05	0.473978	269	2.28327	0.225628		Ca7pos43994019.1	7	43994019	9.51552e-05	0.429368	269	2.18085	0.322377		Ca7pos43994019.1	7	43994019	9.51552e-05	0.429368	269	2.18085	0.322377

## Sheet: Sheet9
				Supplementary Table 10 : List of the MTAs identified for DTM for association panel
	BLINK
	Location 1									Location 2									location 3									Location 4
	SNP	Chromosome	Position	P.value	maf	nobs	effect	PVE(%)		SNP	Chromosome	Position	P.value	maf	nobs	effect	PVE(%)		SNP	Chromosome	Position	P.value	maf	nobs	effect	PVE(%)		SNP	Chromosome	Position	P.value	maf	nobs	effect	PVE( %)
	Ca1pos13015690.1	1	13015690	4.98451e-05	0.139405	269	NA	1.28174e-10		Ca1pos25032551.1	1	25032551	4.55853e-05	0.0520446	269	NA	0.0878111		Ca1pos11296743.1	1	11296743	7.74582e-06	0.200743	269	NA	33.8159		Ca3pos433121.1	3	433121	4.06903e-07	0.496283	269	NA	0.319334
	Ca1pos24189780.1	1	24189780	8.80985e-05	0.139405	269	NA	0.000361424		Ca1pos35255946.1	1	35255946	9.68045e-05	0.342007	269	NA	1.04203		Ca1pos11297491.1	1	11297491	8.08959e-06	0.211896	269	NA	0.0352058		Ca3pos10956124.1	3	10956124	8.82211e-06	0.245353	269	NA	2.84682
	Ca1pos27923068.1	1	27923068	3.50708e-232	0.00371747	269	NA	0.00111977		Ca1pos35289000.1	1	35289000	7.58352e-05	0.340149	269	NA	1.55847e-07		Ca1pos11321130.1	1	11321130	9.8346e-06	0.197026	269	NA	0		Ca3pos11126687.1	3	11126687	3.16494e-05	0.223048	269	NA	0.269812
	Ca1pos46280421.1	1	46280421	4.10864e-05	0.473978	269	NA	0.0023516		Ca1pos35380466.1	1	35380466	9.5761e-05	0.360595	269	NA	0.185153		Ca1pos11322556.1	1	11322556	1.98289e-06	0.165428	269	NA	0		Ca3pos13147329.1	3	13147329	2.41015e-05	0.399628	269	NA	0
	Ca2pos9868275.1	2	9868275	6.24433e-05	0.0408922	269	NA	0.00141957		Ca1pos37929304.1	1	37929304	8.91634e-05	0.0334572	269	NA	0.227515		Ca1pos11334564.1	1	11334564	5.43495e-06	0.182156	269	NA	0.0812058		Ca4pos29622274.1	4	29622274	2.97011e-05	0.446097	269	NA	0.184676
	Ca2pos33955355.1	2	33955355	6.29914e-05	0.178439	269	NA	0.00127369		Ca1pos38767353.1	1	38767353	7.72947e-05	0.340149	269	NA	0.0734237		Ca1pos11334567.1	1	11334567	6.29132e-06	0.184015	269	NA	2.031e-07		Ca4pos29622297.1	4	29622297	2.67916e-05	0.447955	269	NA	0.0215993
	Ca2pos36614993.1	2	36614993	2.92457e-05	0.0836431	269	NA	0.00140986		Ca1pos39350102.1	1	39350102	5.89002e-05	0.349442	269	NA	0.288464		Ca1pos11358008.1	1	11358008	6.19374e-06	0.213755	269	NA	0.479547		Ca4pos35780031.1	4	35780031	2.83919e-05	0.466543	269	NA	0.982577
	Ca2pos36618454.1	2	36618454	6.65889e-05	0.0780669	269	NA	0.00053505		Ca1pos39350103.1	1	39350103	5.89002e-05	0.349442	269	NA	0		Ca1pos11410394.1	1	11410394	3.96594e-06	0.180297	269	NA	5.12433e-09		Ca4pos37858311.1	4	37858311	1.42311e-05	0.107807	269	NA	0.659147
	Ca3pos9945754.1	3	9945754	5.30549e-05	0.14684	269	NA	1.6478e-11		Ca1pos47078811.1	1	47078811	6.19522e-05	0.0446097	269	NA	0		Ca4pos8293430.1	4	8293430	7.94852e-06	0.133829	269	NA	0.291952		Ca5pos38204301.1	5	38204301	2.38193e-05	0.0501859	269	NA	0.204203
	Ca3pos27382708.1	3	27382708	3.16383e-06	0.0892193	269	NA	0.000251181		Ca3pos7214473.1	3	7214473	1.23221e-05	0.0669145	269	NA	0.214102		Ca4pos24382618.1	4	24382618	9.79823e-06	0.0520446	269	NA	0.0861203		Ca6pos9440842.1	6	9440842	1.26501e-06	0.184015	269	NA	0.437124
	Ca3pos36849617.1	3	36849617	8.29887e-05	0.0947955	269	NA	0.00324845		Ca3pos21184532.1	3	21184532	9.03701e-05	0.0892193	269	NA	0.676144		Ca4pos34086985.1	4	34086985	7.00042e-06	0.0539033	269	NA	0.397637		Ca6pos13538861.1	6	13538861	1.91689e-05	0.174721	269	NA	2.51828e-08
	Ca3pos37146637.1	3	37146637	5.25345e-05	0.0799257	269	NA	0.000676729		Ca3pos22261937.1	3	22261937	4.00775e-05	0.0669145	269	NA	0.297139		Ca6pos27533388.1	6	27533388	2.51836e-06	0.0427509	269	NA	0		Ca6pos19684726.1	6	19684726	2.21276e-05	0.312268	269	NA	0.42901
	Ca4pos40376439.1	4	40376439	4.74565e-05	0.107807	269	NA	7.42844e-09		Ca5pos44315903.1	5	44315903	3.57691e-05	0.198885	269	NA	5.65047e-05		Ca6pos40712342.1	6	40712342	3.20174e-06	0.0464684	269	NA	0.0872571		Ca6pos21083219.1	6	21083219	1.31188e-05	0.20632	269	NA	0.643543
	Ca4pos43128367.1	4	43128367	6.9211e-06	0.410781	269	NA	0.00145922		Ca5pos44418028.1	5	44418028	5.89201e-06	0.208178	269	NA	0.215311		Ca6pos50195492.1	6	50195492	3.14297e-06	0.0408922	269	NA	4.76707e-08		Ca6pos34164845.1	6	34164845	2.8941e-05	0.291822	269	NA	0.579525
	Ca5pos13624388.1	5	13624388	2.8409e-05	0.349442	269	NA	0.00109716		Ca6pos6449015.1	6	6449015	3.35265e-05	0.0873606	269	NA	0		Ca6pos50203871.1	6	50203871	5.77969e-06	0.0446097	269	NA	2.28127e-08		Ca6pos39048917.1	6	39048917	2.01071e-05	0.490706	269	NA	7.89887
	Ca5pos41609413.1	5	41609413	9.3302e-05	0.187732	269	NA	0.000526217		Ca6pos17041860.1	6	17041860	8.45221e-06	0.0873606	269	NA	0		Ca6pos51760725.1	6	51760725	1.92581e-06	0.035316	269	NA	0.540751		Ca6pos54052689.1	6	54052689	2.68179e-05	0.0297398	269	NA	0.981781
	Ca6pos33233648.1	6	33233648	7.86886e-05	0.0223048	269	NA	0.00496445		Ca7pos15302922.1	7	15302922	7.11816e-05	0.152416	269	NA	0		Ca6pos54742568.1	6	54742568	6.85975e-06	0.0334572	269	NA	2.72172e-08		Ca7pos19717038.1	7	19717038	2.71344e-05	0.0892193	269	NA	1.8102
	Ca6pos33233650.1	6	33233650	7.86886e-05	0.0223048	269	NA	99.7862		Ca7pos15443590.1	7	15443590	8.25353e-05	0.113383	269	NA	0.587198		Ca6pos55900560.1	6	55900560	6.25395e-06	0.0687732	269	NA	0		Ca7pos30208448.1	7	30208448	1.89453e-05	0.494424	269	NA	0.0546619
	Ca6pos33233651.1	6	33233651	7.86886e-05	0.0223048	269	NA	0.000221807		Ca7pos29535141.1	7	29535141	6.56273e-05	0.105948	269	NA	1.43837		Ca6pos58075486.1	6	58075486	5.94509e-06	0.098513	269	NA	0		Ca7pos37549416.1	7	37549416	3.04594e-05	0.0855019	269	NA	0.262538
	Ca7pos2873380.1	7	2873380	9.12115e-05	0.0669145	269	NA	0.000746974		Ca7pos34819563.1	7	34819563	6.12977e-05	0.0539033	269	NA	1.1737		Ca7pos18606720.1	7	18606720	2.63705e-13	0.496283	269	NA	0.690068		Ca7pos37824197.1	7	37824197	1.45817e-05	0.364312	269	NA	0.156173
	FarmCPU
	Location 1									Location 2									location 3									Location 4
	SNP	Chromosome	Position	P.value	maf	nobs	effect	PVE(%)		SNP	Chromosome	Position	P.value	maf	nobs	effect	PVE(%)		SNP	Chromosome	Position	P.value	maf	nobs	effect	PVE(%)		SNP	Chromosome	Position	P.value	maf	nobs	effect	PVE(%)
	Ca1pos13015690.1	1	13015690	1.62737e-06	0.139405	269	-3.88871	0.00185156		Ca1pos25032551.1	1	25032551	4.568e-05	0.0520446	269	4.43386	0.0878111		Ca1pos9168435.1	1	9168435	3.03243e-07	0.0687732	269	2.77959	42.3744		Ca3pos433121.1	3	433121	4.08318e-07	0.496283	269	-10.5876	0.319334
	Ca1pos27923068.1	1	27923068	9.75044e-195	0.00371747	269	-585.244	0.00396974		Ca1pos35255946.1	1	35255946	9.69904e-05	0.342007	269	-2.6994	1.04203		Ca1pos13694567.1	1	13694567	7.77792e-08	0.47026	269	1.09358	2.39066		Ca3pos10956124.1	3	10956124	8.84636e-06	0.245353	269	-0.964162	2.84682
	Ca1pos28045867.1	1	28045867	4.57281e-07	0.20632	269	-2.15014	0.00299164		Ca1pos35289000.1	1	35289000	7.59847e-05	0.340149	269	4.03477	1.55847e-07		Ca1pos39134699.1	1	39134699	3.7904e-06	0.0817844	269	2.0528	1.02945		Ca3pos11126687.1	3	11126687	3.17268e-05	0.223048	269	1.49489	0.269812
	Ca2pos7011944.1	2	7011944	2.25059e-05	0.154275	269	-3.40715	0.00299878		Ca1pos35380466.1	1	35380466	9.59451e-05	0.360595	269	-2.63725	0.185153		Ca1pos45766265.1	1	45766265	1.93496e-11	0.0762082	269	2.24447	1.31532		Ca3pos13147329.1	3	13147329	2.4162e-05	0.399628	269	-1.90387	0
	Ca2pos10101769.1	2	10101769	7.35653e-10	0.0539033	269	-6.14026	0.00221432		Ca1pos37929304.1	1	37929304	8.93362e-05	0.0334572	269	5.27951	0.227515		Ca2pos4784871.1	2	4784871	7.0487e-07	0.236059	269	-1.47051	2.64813		Ca4pos29622274.1	4	29622274	2.97742e-05	0.446097	269	-2.13516	0.184676
	Ca3pos27427386.1	3	27427386	2.78299e-06	0.0650558	269	5.54739	0.00295732		Ca1pos38767353.1	1	38767353	7.74468e-05	0.340149	269	-2.84918	0.0734237		Ca2pos5640366.1	2	5640366	1.6937e-06	0.0669145	269	1.57928	1.65361		Ca4pos29622297.1	4	29622297	2.68582e-05	0.447955	269	2.23928	0.0215993
	Ca4pos17435905.1	4	17435905	5.78427e-07	0.0817844	269	4.71517	0.00133057		Ca1pos39350102.1	1	39350102	5.90194e-05	0.349442	269	-2.69535	0.288464		Ca2pos7262364.1	2	7262364	9.06312e-06	0.0446097	269	2.43691	0.486644		Ca4pos35780031.1	4	35780031	2.84621e-05	0.466543	269	-2.86997	0.982577
	Ca4pos28234674.1	4	28234674	1.95131e-05	0.0873606	269	-4.40283	0.00428702		Ca1pos39350103.1	1	39350103	5.90194e-05	0.349442	269	-2.69535	0		Ca2pos8022638.1	2	8022638	6.57411e-07	0.111524	269	1.40251	0.272297		Ca4pos37858311.1	4	37858311	1.42686e-05	0.107807	269	-1.47651	0.659147
	Ca4pos40306168.1	4	40306168	1.01604e-08	0.107807	269	3.84517	0.00109153		Ca1pos47078811.1	1	47078811	6.2077e-05	0.0446097	269	4.67879	0		Ca3pos34628448.1	3	34628448	1.50442e-09	0.165428	269	1.54477	0.337597		Ca5pos38204301.1	5	38204301	2.38791e-05	0.0501859	269	-2.13163	0.204203
	Ca4pos40928294.1	4	40928294	4.5707e-06	0.105948	269	-4.2551	0.000816205		Ca3pos7214473.1	3	7214473	1.2351e-05	0.0669145	269	3.06283	0.214102		Ca4pos4633790.1	4	4633790	2.12287e-06	0.0762082	269	2.13135	0.150852		Ca6pos9440842.1	6	9440842	1.26907e-06	0.184015	269	1.31901	0.437124
	Ca4pos43128367.1	4	43128367	3.74671e-07	0.410781	269	-4.42806	0.00161041		Ca3pos21184532.1	3	21184532	9.0545e-05	0.0892193	269	-2.74858	0.676144		Ca4pos26790905.1	4	26790905	2.42105e-09	0.0613383	269	3.36099	1.67194		Ca6pos13538861.1	6	13538861	1.92181e-05	0.174721	269	-1.1547	2.51828e-08
	Ca5pos13624388.1	5	13624388	2.22108e-07	0.349442	269	-3.76111	0.000287301		Ca3pos22261937.1	3	22261937	4.01618e-05	0.0669145	269	3.4089	0.297139		Ca5pos6125129.1	5	6125129	4.58264e-07	0.169145	269	1.71815	0.399987		Ca6pos19684726.1	6	19684726	2.21836e-05	0.312268	269	0.950574	0.42901
	Ca5pos41609413.1	5	41609413	1.19834e-07	0.187732	269	3.99571	0.00109135		Ca5pos44315903.1	5	44315903	3.58452e-05	0.198885	269	-1.9404	5.65047e-05		Ca5pos22801639.1	5	22801639	1.03505e-05	0.0724907	269	-2.18433	0.786911		Ca6pos21083219.1	6	21083219	1.31536e-05	0.20632	269	-1.13295	0.643543
	Ca6pos8474255.1	6	8474255	2.11947e-05	0.0966543	269	-4.18359	0.000572497		Ca5pos44418028.1	5	44418028	5.90675e-06	0.208178	269	2.08801	0.215311		Ca6pos5114273.1	6	5114273	3.02456e-07	0.109665	269	1.55923	0.410377		Ca6pos34164845.1	6	34164845	2.90124e-05	0.291822	269	-1.53317	0.579525
	Ca6pos11563026.1	6	11563026	1.26854e-07	0.223048	269	-4.03277	0.00108188		Ca6pos6449015.1	6	6449015	3.35983e-05	0.0873606	269	3.10341	0		Ca6pos39939647.1	6	39939647	2.06384e-05	0.0539033	269	2.20801	0.312615		Ca6pos39048917.1	6	39048917	2.01584e-05	0.490706	269	-5.72206	7.89887
	Ca6pos17369940.1	6	17369940	4.6993e-06	0.0576208	269	-4.30508	0.00235325		Ca6pos17041860.1	6	17041860	8.47272e-06	0.0873606	269	-3.1578	0		Ca6pos54742568.1	6	54742568	1.6684e-12	0.0334572	269	4.4621	0.642509		Ca6pos54052689.1	6	54052689	2.68846e-05	0.0297398	269	-2.41708	0.981781
	Ca6pos28247987.1	6	28247987	4.06998e-06	0.342007	269	3.37449	0.00265273		Ca7pos15302922.1	7	15302922	7.13228e-05	0.152416	269	-2.04912	0		Ca7pos18606720.1	7	18606720	3.87298e-10	0.496283	269	10.0897	0.729822		Ca7pos19717038.1	7	19717038	2.72018e-05	0.0892193	269	-1.98889	1.8102
	Ca6pos44136469.1	6	44136469	2.64655e-07	0.0892193	269	4.49501	0.000812649		Ca7pos15443590.1	7	15443590	8.26965e-05	0.113383	269	-2.37659	0.587198		Ca7pos21028431.1	7	21028431	2.40603e-05	0.100372	269	2.07164	0.226922		Ca7pos30208448.1	7	30208448	1.89939e-05	0.494424	269	-7.33163	0.0546619
	Ca6pos58002384.1	6	58002384	2.65178e-07	0.0446097	269	-6.54186	99.84		Ca7pos29535141.1	7	29535141	6.57587e-05	0.105948	269	-2.52858	1.43837		Ca7pos44115440.1	7	44115440	2.42242e-05	0.17658	269	1.51905	0.638283		Ca7pos37549416.1	7	37549416	3.05342e-05	0.0855019	269	-2.00068	0.262538
	Ca7pos26268640.1	7	26268640	3.54345e-06	0.418216	269	4.44333	0.00170565		Ca7pos34819563.1	7	34819563	6.14212e-05	0.0539033	269	-3.41761	1.1737		Ca8pos2346648.1	8	2346648	1.09911e-06	0.243494	269	1.63828	0.712975		Ca7pos37824197.1	7	37824197	1.46201e-05	0.364312	269	-1.63724	0.156173
	MLM
	Location 1									Location 2									location 3									Location 4
	SNP	Chromosome	Position	P.value	maf	nobs	effect	PVE(%)		SNP	Chromosome	Position	P.value	maf	nobs	effect	PVE(%)		SNP	Chromosome	Position	P.value	maf	nobs	effect	PVE(%)		SNP	Chromosome	Position	P.value	maf	nobs	effect	PVE(%)
	Ca1pos27923068.1	1	27923068	3.56903e-41	0.00371747	269	-594.146	1.26569e-10		Ca1pos25032531.1	1	25032531	6.15494e-05	0.0724907	269	3.65869	3.76136		Ca1pos29737724.1	1	29737724	1.55304e-05	0.267658	269	1.73393	0.325527		Ca1pos29737724.1	1	29737724	1.55304e-05	0.267658	269	1.73393	0.325527
	Ca1pos37121762.1	1	37121762	5.94514e-12	0.490706	269	-236.789	0		Ca1pos30469246.1	1	30469246	7.15592e-05	0.0501859	269	4.18656	0.528042		Ca1pos29737735.1	1	29737735	1.83475e-05	0.262082	269	1.72148	0.202503		Ca1pos29737735.1	1	29737735	1.83475e-05	0.262082	269	1.72148	0.202503
	Ca2pos29737657.1	2	29737657	3.12499e-10	0.488848	269	-196.686	0		Ca1pos37929293.1	1	37929293	4.71209e-05	0.0371747	269	5.03651	1.25273		Ca1pos35657969.1	1	35657969	9.29153e-05	0.0669145	269	2.26811	0.471616		Ca1pos35657969.1	1	35657969	9.29153e-05	0.0669145	269	2.26811	0.471616
	Ca3pos37955353.1	3	37955353	1.42123e-13	0.492565	269	-296.955	0.000335956		Ca1pos37929295.1	1	37929295	2.50945e-05	0.0724907	269	2.65714	0		Ca2pos23232332.1	2	23232332	9.63991e-05	0.154275	269	-1.11668	0.0850879		Ca2pos23232332.1	2	23232332	9.63991e-05	0.154275	269	-1.11668	0.0850879
	Ca4pos23269843.1	4	23269843	1.97341e-10	0.496283	269	-199.076	0.000367772		Ca1pos37929304.1	1	37929304	3.69083e-06	0.0334572	269	6.04631	0		Ca3pos433121.1	3	433121	0.000102069	0.496283	269	-8.97574	0		Ca3pos433121.1	3	433121	0.000102069	0.496283	269	-8.97574	0
	Ca4pos35470158.1	4	35470158	5.9666e-14	0.5	269	291.435	0		Ca1pos47078811.1	1	47078811	8.72142e-06	0.0446097	269	4.98989	0.105013		Ca3pos10956124.1	3	10956124	0.000110237	0.245353	269	-0.921622	0.156488		Ca3pos10956124.1	3	10956124	0.000110237	0.245353	269	-0.921622	0.156488
	Ca4pos35470160.1	4	35470160	1.42773e-11	0.498141	269	233.025	0		Ca1pos47078836.1	1	47078836	4.48612e-05	0.0817844	269	2.56491	6.78715e-07		Ca3pos13147329.1	3	13147329	3.76478e-05	0.399628	269	-2.04387	0.511776		Ca3pos13147329.1	3	13147329	3.76478e-05	0.399628	269	-2.04387	0.511776
	Ca5pos6830206.1	5	6830206	1.08939e-09	0.492565	269	-189.712	0		Ca2pos6643418.1	2	6643418	3.42696e-05	0.5	269	-10.8969	2.45609		Ca4pos35780031.1	4	35780031	0.000108317	0.466543	269	-2.90937	0.19159		Ca4pos35780031.1	4	35780031	0.000108317	0.466543	269	-2.90937	0.19159
	Ca5pos6830893.1	5	6830893	4.20357e-10	0.5	269	-194.736	0		Ca3pos7214464.1	3	7214464	1.40611e-05	0.0520446	269	4.54097	0		Ca5pos29910669.1	5	29910669	7.19496e-05	0.0557621	269	1.71005	0.176732		Ca5pos29910669.1	5	29910669	7.19496e-05	0.0557621	269	1.71005	0.176732
	Ca5pos6830948.1	5	6830948	1.12748e-13	0.5	269	-288.086	0		Ca3pos7214473.1	3	7214473	1.54732e-06	0.0669145	269	3.22103	0.309788		Ca5pos29910672.1	5	29910672	1.21427e-05	0.0260223	269	3.9023	5.21862		Ca5pos29910672.1	5	29910672	1.21427e-05	0.0260223	269	3.9023	5.21862
	Ca5pos6836160.1	5	6836160	7.12227e-10	0.5	269	192.764	1.23164e-09		Ca4pos7532924.1	4	7532924	9.53728e-06	0.10223	269	-2.79479	0.644049		Ca6pos32512792.1	6	32512792	6.62251e-05	0.180297	269	-1.64441	0.428388		Ca6pos32512792.1	6	32512792	6.62251e-05	0.180297	269	-1.64441	0.428388
	Ca5pos38433089.1	5	38433089	4.3889e-14	0.5	269	290.875	6.43834e-11		Ca4pos35852802.1	4	35852802	7.71269e-05	0.0613383	269	3.83357	0.438735		Ca6pos34164845.1	6	34164845	6.28261e-05	0.291822	269	-1.6137	0.134572		Ca6pos34164845.1	6	34164845	6.28261e-05	0.291822	269	-1.6137	0.134572
	Ca5pos43920706.1	5	43920706	1.94262e-14	0.496283	269	-295.655	1.43025e-10		Ca4pos42120055.1	4	42120055	5.71042e-05	0.498141	269	-20.9519	13.2762		Ca6pos38503703.1	6	38503703	7.03381e-05	0.375465	269	-1.19582	0.143374		Ca6pos38503703.1	6	38503703	7.03381e-05	0.375465	269	-1.19582	0.143374
	Ca6pos1683083.1	6	1683083	4.88115e-10	0.492565	269	-194.473	5.13382e-10		Ca4pos45770534.1	4	45770534	8.0984e-05	0.0947955	269	3.20017	0.449741		Ca6pos49267149.1	6	49267149	6.13497e-05	0.070632	269	2.28431	0.862867		Ca6pos49267149.1	6	49267149	6.13497e-05	0.070632	269	2.28431	0.862867
	Ca6pos9351547.1	6	9351547	1.56089e-09	0.0297398	269	91.3488	1.61798e-10		Ca5pos2340049.1	5	2340049	7.74259e-05	0.0817844	269	3.39986	0.505147		Ca6pos56003699.1	6	56003699	9.10221e-05	0.345725	269	1.1366	8.95655e-08		Ca6pos56003699.1	6	56003699	9.10221e-05	0.345725	269	1.1366	8.95655e-08
	Ca6pos46391202.1	6	46391202	9.15072e-18	0.0111524	269	-196.17	0		Ca5pos16985921.1	5	16985921	9.25954e-05	0.111524	269	3.10968	0.297455		Ca7pos30208448.1	7	30208448	9.93672e-05	0.494424	269	-7.33163	0.230664		Ca7pos30208448.1	7	30208448	9.93672e-05	0.494424	269	-7.33163	0.230664
	Ca7pos16095677.1	7	16095677	6.4781e-24	0.496283	269	-578.118	0		Ca5pos21309313.1	5	21309313	3.89677e-05	0.167286	269	2.82996	1.38202		Ca7pos37819116.1	7	37819116	2.0573e-05	0.211896	269	-1.70369	12.5239		Ca7pos37819116.1	7	37819116	2.0573e-05	0.211896	269	-1.70369	12.5239
	Ca7pos16095678.1	7	16095678	6.4781e-24	0.496283	269	-578.118	2.01424e-11		Ca6pos17041860.1	6	17041860	4.08258e-05	0.0873606	269	-2.85913	0		Ca7pos38104650.1	7	38104650	8.60118e-05	0.486989	269	3.57025	1.4008e-08		Ca7pos38104650.1	7	38104650	8.60118e-05	0.486989	269	3.57025	1.4008e-08
	Ca7pos28094158.1	7	28094158	1.17277e-09	0.494424	269	-174.257	6.99381e-11		Ca6pos37981519.1	6	37981519	5.71042e-05	0.498141	269	-20.9519	0		Ca8pos6577068.1	8	6577068	6.07222e-05	0.449814	269	1.04573	2.42542e-08		Ca8pos6577068.1	8	6577068	6.07222e-05	0.449814	269	1.04573	2.42542e-08
	Ca8pos12984150.1	8	12984150	1.50539e-17	0.498141	269	-387.019	99.7118		Ca7pos47827338.1	7	47827338	6.93776e-05	0.459108	269	-4.20046	0		Ca8pos13063685.1	8	13063685	0.000105215	0.035316	269	-2.17004	0.287975		Ca8pos13063685.1	8	13063685	0.000105215	0.035316	269	-2.17004	0.287975

## Sheet: Sheet10
				Supplememtary Table 11 : List of the MTAs identified for PH for association panel
	Blink
	Location 1									Location 2									Location 3
	SNP	Chromosome	Position	P.value	maf	nobs	effect	PVE(%)		SNP	Chromosome	Position	P.value	maf	nobs	effect	P_V_E(%)		SNP	Chromosome	Position	P.value	maf	nobs	effect	PVE(%)
	Ca1pos20028433.1	1	20028433	2.74683e-05	0.0613383	269	NA	0.408687		Ca1pos38425449.1	1	38425449	2.21e-05	0.133829	269	NA	1.87015		Ca1pos18871934.1	1	18871934	4.03022e-05	0.0557621	269	NA	0.313849
	Ca1pos25342771.1	1	25342771	2.59222e-05	0.184015	269	NA	0.869201		Ca1pos45295181.1	1	45295181	9.11e-06	0.0483271	269	NA	0.417501		Ca1pos32853249.1	1	32853249	1.86707e-05	0.137546	269	NA	0.130577
	Ca2pos35791810.1	2	35791810	6.16622e-05	0.152416	269	NA	0.376027		Ca2pos4586809.1	2	4586809	1.2e-05	0.0947955	269	NA	0.505425		Ca2pos4245119.1	2	4245119	5.17701e-05	0.10223	269	NA	0.043901
	Ca3pos9637398.1	3	9637398	5.07882e-05	0.10223	269	NA	0.018692		Ca2pos20412443.1	2	20412443	1.53e-05	0.0557621	269	NA	8.43e-08		Ca4pos22515677.1	4	22515677	2.30855e-05	0.070632	269	NA	0
	Ca3pos20424503.1	3	20424503	2.09002e-05	0.0650558	269	NA	0.355654		Ca2pos20412445.1	2	20412445	1.96e-05	0.0557621	269	NA	0.456946		Ca4pos43142766.1	4	43142766	1.35424e-05	0.0687732	269	NA	0.5343
	Ca4pos2860119.1	4	2860119	5.33043e-05	0.297398	269	NA	2.098e-08		Ca2pos20412447.1	2	20412447	1.96e-05	0.0557621	269	NA	0.975713		Ca4pos47411286.1	4	47411286	8.06018e-07	0.314126	269	NA	0.125189
	Ca4pos14884865.1	4	14884865	5.83888e-05	0.0650558	269	NA	0.775189		Ca2pos20412448.1	2	20412448	1.96e-05	0.0557621	269	NA	0.217362		Ca5pos492868.1	5	492868	6.0617e-07	0.481413	269	NA	0.415105
	Ca4pos14884892.1	4	14884892	1.25409e-05	0.063197	269	NA	0.195858		Ca2pos20412450.1	2	20412450	2.96e-06	0.0947955	269	NA	0.733892		Ca5pos492892.1	5	492892	1.30015e-06	0.479554	269	NA	0.0810376
	Ca4pos14894073.1	4	14894073	3.38112e-05	0.0780669	269	NA	2.45906		Ca3pos6332467.1	3	6332467	6.58e-06	0.0687732	269	NA	0.412655		Ca5pos5213651.1	5	5213651	5.31153e-05	0.0873606	269	NA	0.343449
	Ca4pos14900021.1	4	14900021	2.44757e-05	0.070632	269	NA	0.292166		Ca3pos9195641.1	3	9195641	5.82e-06	0.472119	269	NA	5.79544		Ca5pos20850495.1	5	20850495	2.318e-05	0.0836431	269	NA	0.119098
	Ca4pos24485124.1	4	24485124	1.19074e-05	0.157993	269	NA	0.756735		Ca3pos25992458.1	3	25992458	1.82e-05	0.498141	269	NA	0.763151		Ca6pos23096322.1	6	23096322	3.50334e-05	0.0408922	269	NA	0.44731
	Ca4pos32772410.1	4	32772410	4.42752e-05	0.488848	269	NA	0.451952		Ca3pos36776832.1	3	36776832	2.47e-05	0.0669145	269	NA	0.170433		Ca6pos30264772.1	6	30264772	1.65847e-05	0.0576208	269	NA	0.634797
	Ca5pos10953477.1	5	10953477	6.07113e-06	0.13197	269	NA	0.097995		Ca4pos23270279.1	4	23270279	1.26e-05	0.35316	269	NA	0.114708		Ca6pos32853368.1	6	32853368	2.22888e-05	0.0910781	269	NA	0.0291458
	Ca5pos20771900.1	5	20771900	6.10485e-05	0.282528	269	NA	0.399522		Ca4pos27272078.1	4	27272078	2.35e-05	0.0613383	269	NA	0.0601936		Ca6pos39167646.1	6	39167646	2.27513e-05	0.0650558	269	NA	0.67637
	Ca5pos40172866.1	5	40172866	5.57423e-05	0.0390335	269	NA	0.287593		Ca4pos28892601.1	4	28892601	3.02e-06	0.234201	269	NA	0.0147896		Ca6pos40035995.1	6	40035995	2.16648e-05	0.124535	269	NA	0.144718
	Ca6pos46508127.1	6	46508127	5.49916e-05	0.289963	269	NA	0.183703		Ca4pos35470016.1	4	35470016	2.53e-05	0.496283	269	NA	0.000861832		Ca6pos42425654.1	6	42425654	1.76479e-05	0.418216	269	NA	0.136636
	Ca6pos53070777.1	6	53070777	5.35863e-05	0.144981	269	NA	1.9455		Ca5pos951587.1	5	951587	6.95e-07	0.0483271	269	NA	1.57e-07		Ca6pos46148014.1	6	46148014	2.95292e-05	0.163569	269	NA	0.0811588
	Ca6pos53070791.1	6	53070791	2.35115e-05	0.286245	269	NA	0.437972		Ca5pos13850043.1	5	13850043	1.68e-06	0.0650558	269	NA	0.51071		Ca7pos281538.1	7	281538	4.74289e-05	0.0817844	269	NA	0.17817
	Ca7pos13111359.1	7	13111359	2.54757e-05	0.243494	269	NA	0.534511		Ca6pos52245740.1	6	52245740	1.28e-05	0.0613383	269	NA	0.540282		Ca7pos830745.1	7	830745	4.52029e-05	0.0501859	269	NA	0.795871
	Ca7pos37437486.1	7	37437486	2.7453e-06	0.408922	269	NA	1.40668		Ca8pos12985350.1	8	12985350	4.16e-06	0.498141	269	NA	0.407569		Ca8pos6280676.1	8	6280676	1.99634e-05	0.143123	269	NA	0.286563
	FarmCPU
	Location 1									Location 2									Location 3									Location 4
	SNP	Chromosome	Position	P.value	maf	nobs	effect	PVE(%)		SNP	Chromosome	Position	P.value	maf	nobs	effect	PVE(%)		SNP	Chromosome	Position	P.value	maf	nobs	effect	PVE(%)		SNP	Chromosome	Position	P.value	maf	nobs	effect	PVE(%)
	Ca1pos20028433.1	1	20028433	2.75284e-05	0.0613383	269	3.81864	0.408687		Ca1pos38425449.1	1	38425449	2.21669e-05	0.133829	269	2.28502	1.87015		Ca1pos18871934.1	1	18871934	4.03766e-05	0.0557621	269	-3.62147	0.313849		Ca1pos5661755.1	1	5661755	4.21622e-05	0.0557621	269	-3.52805	0.19383
	Ca1pos25342771.1	1	25342771	2.59792e-05	0.184015	269	2.62027	0.869201		Ca1pos45295181.1	1	45295181	9.14256e-06	0.0483271	269	3.55411	0.417501		Ca1pos32853249.1	1	32853249	1.87078e-05	0.137546	269	-1.74213	0.130577		Ca1pos27773061.1	1	27773061	2.1102e-05	0.468401	269	5.45127	0.385172
	Ca2pos35791810.1	2	35791810	6.17867e-05	0.152416	269	-2.4	0.376027		Ca2pos4586809.1	2	4586809	1.20736e-05	0.0947955	269	2.67527	0.505425		Ca2pos4245119.1	2	4245119	5.18633e-05	0.10223	269	2.54456	0.043901		Ca1pos44478718.1	1	44478718	3.25175e-05	0.0873606	269	3.44198	0
	Ca3pos9637398.1	3	9637398	5.08927e-05	0.10223	269	-3.00646	0.018692		Ca2pos20412443.1	2	20412443	1.53922e-05	0.0557621	269	3.24406	8.43422e-08		Ca4pos22515677.1	4	22515677	2.31305e-05	0.070632	269	-3.37232	0		Ca2pos20166203.1	2	20166203	3.57908e-05	0.45539	269	3.64423	0
	Ca3pos20424503.1	3	20424503	2.09471e-05	0.0650558	269	2.98234	0.355654		Ca2pos20412445.1	2	20412445	1.97028e-05	0.0557621	269	3.20055	0.456946		Ca4pos43142766.1	4	43142766	1.35701e-05	0.0687732	269	-3.59061	0.5343		Ca2pos23118940.1	2	23118940	1.32709e-05	0.156134	269	-2.97211	1.10488e-09
	Ca4pos2860119.1	4	2860119	5.34135e-05	0.297398	269	1.44893	2.098e-08		Ca2pos20412447.1	2	20412447	1.97028e-05	0.0557621	269	3.20055	0.975713		Ca4pos47411286.1	4	47411286	8.08081e-07	0.314126	269	2.78582	0.125189		Ca2pos24933870.1	2	24933870	1.41637e-05	0.0557621	269	4.27589	2.50159
	Ca4pos14884865.1	4	14884865	5.85073e-05	0.0650558	269	2.91881	0.775189		Ca2pos20412448.1	2	20412448	1.97028e-05	0.0557621	269	3.20055	0.217362		Ca5pos492868.1	5	492868	6.07753e-07	0.481413	269	7.33861	0.415105		Ca4pos8715147.1	4	8715147	4.16822e-05	0.159851	269	1.98897	1.04326
	Ca4pos14884892.1	4	14884892	1.25704e-05	0.063197	269	3.22572	0.195858		Ca2pos20412450.1	2	20412450	2.96817e-06	0.0947955	269	2.00224	0.733892		Ca5pos492892.1	5	492892	1.30337e-06	0.479554	269	6.78458	0.0810376		Ca4pos8818268.1	4	8818268	1.4321e-05	0.148699	269	2.26972	0.584038
	Ca4pos14894073.1	4	14894073	3.38837e-05	0.0780669	269	2.96945	2.45906		Ca3pos6332467.1	3	6332467	6.60665e-06	0.0687732	269	3.09155	0.412655		Ca5pos5213651.1	5	5213651	5.32106e-05	0.0873606	269	2.74255	0.343449		Ca4pos8897430.1	4	8897430	2.49315e-05	0.178439	269	2.03177	0.307879
	Ca4pos14900021.1	4	14900021	2.45298e-05	0.070632	269	3.17132	0.292166		Ca3pos9195641.1	3	9195641	5.84818e-06	0.472119	269	-1.1235	5.79544		Ca5pos20850495.1	5	20850495	2.32251e-05	0.0836431	269	-3.14189	0.119098		Ca4pos9195726.1	4	9195726	8.39556e-06	0.139405	269	2.26814	0
	Ca4pos24485124.1	4	24485124	1.19356e-05	0.157993	269	-2.79654	0.756735		Ca3pos25992458.1	3	25992458	1.82688e-05	0.498141	269	-9.59138	0.763151		Ca6pos23096322.1	6	23096322	3.5099e-05	0.0408922	269	-3.56614	0.44731		Ca4pos21349204.1	4	21349204	2.5173e-05	0.156134	269	-2.85697	0.164235
	Ca4pos32772410.1	4	32772410	4.43676e-05	0.488848	269	-8.24351	0.451952		Ca3pos36776832.1	3	36776832	2.47475e-05	0.0669145	269	-2.4113	0.170433		Ca6pos30264772.1	6	30264772	1.6618e-05	0.0576208	269	-3.77096	0.634797		Ca4pos21349205.1	4	21349205	2.5173e-05	0.156134	269	-2.85697	0.617727
	Ca5pos10953477.1	5	10953477	6.08632e-06	0.13197	269	-3.09549	0.097995		Ca4pos23270279.1	4	23270279	1.26034e-05	0.35316	269	-2.26193	0.114708		Ca6pos32853368.1	6	32853368	2.23323e-05	0.0910781	269	-3.06514	0.0291458		Ca5pos17114674.1	5	17114674	1.58071e-05	0.156134	269	2.96024	0
	Ca5pos20771900.1	5	20771900	6.11719e-05	0.282528	269	-2.41027	0.399522		Ca4pos27272078.1	4	27272078	2.35671e-05	0.0613383	269	-3.07012	0.0601936		Ca6pos39167646.1	6	39167646	2.27956e-05	0.0650558	269	-3.50126	0.67637		Ca5pos17114706.1	5	17114706	5.32782e-06	0.154275	269	3.13151	0.378443
	Ca5pos40172866.1	5	40172866	5.5856e-05	0.0390335	269	-3.52838	0.287593		Ca4pos28892601.1	4	28892601	3.02942e-06	0.234201	269	2.24962	0.0147896		Ca6pos40035995.1	6	40035995	2.17072e-05	0.124535	269	2.7193	0.144718		Ca5pos17114712.1	5	17114712	6.05542e-06	0.156134	269	3.1067	0.130512
	Ca6pos46508127.1	6	46508127	5.5104e-05	0.289963	269	2.44804	0.183703		Ca4pos35470016.1	4	35470016	2.53671e-05	0.496283	269	-11.6424	0.000861832		Ca6pos42425654.1	6	42425654	1.76831e-05	0.418216	269	3.24646	0.136636		Ca6pos12311862.1	6	12311862	3.73281e-05	0.0483271	269	4.3367	2.70422e-06
	Ca6pos53070777.1	6	53070777	5.36961e-05	0.144981	269	2.67014	1.9455		Ca5pos951587.1	5	951587	6.98671e-07	0.0483271	269	3.97358	1.57368e-07		Ca6pos46148014.1	6	46148014	2.95853e-05	0.163569	269	-2.5009	0.0811588		Ca6pos52464995.1	6	52464995	2.69572e-05	0.267658	269	2.67769	0.0951299
	Ca6pos53070791.1	6	53070791	2.35637e-05	0.286245	269	1.41657	0.437972		Ca5pos13850043.1	5	13850043	1.69026e-06	0.0650558	269	3.41371	0.51071		Ca7pos281538.1	7	281538	4.7515e-05	0.0817844	269	-2.6387	0.17817		Ca7pos23824983.1	7	23824983	1.44782e-05	0.104089	269	3.32621	0.359477
	Ca7pos13111359.1	7	13111359	2.55318e-05	0.243494	269	-2.53087	0.534511		Ca6pos52245740.1	6	52245740	1.28341e-05	0.0613383	269	3.14175	0.540282		Ca7pos830745.1	7	830745	4.52854e-05	0.0501859	269	3.16734	0.795871		Ca7pos23824988.1	7	23824988	1.49602e-05	0.0966543	269	3.40903	0.259085
	Ca7pos37437486.1	7	37437486	2.75262e-06	0.408922	269	-3.71108	1.40668		Ca8pos12985350.1	8	12985350	4.17766e-06	0.498141	269	-7.95645	0.407569		Ca8pos6280676.1	8	6280676	2.00028e-05	0.143123	269	2.60204	0.286563		Ca7pos37850781.1	7	37850781	2.95746e-05	0.250929	269	-2.61827	0.30025
	MLM
	Location 1									Location 2									Location 3									Location 4
	SNP	Chromosome	Position	P.value	maf	nobs	effect	PVE(%)		SNP	Chromosome	Position	P.value	maf	nobs	effect	PVE(%)		SNP	Chromosome	Position	P.value	maf	nobs	effect	PVE(%)		SNP	Chromosome	Position	P.value	maf	nobs	effect	PVE(%)
	Ca1pos18227113.1	1	18227113	0.000123428	0.250929	269	2.50937	0		Ca1pos29852202.1	1	29852202	9.96986e-05	0.47026	269	-4.34499	0.778467		Ca1pos27773061.1	1	27773061	8.2497e-05	0.468401	269	5.31183	0.736639	1	Ca1pos27773061.1	1	27773061	8.2497e-05	0.468401	269	5.31183	0.736639
	Ca1pos18227120.1	1	18227120	8.3867e-05	0.254647	269	2.5725	0.528359		Ca1pos29852204.1	1	29852204	9.08616e-05	0.472119	269	-4.49658	0.357255		Ca2pos20166203.1	2	20166203	9.11218e-05	0.45539	269	3.65106	0.33083	2	Ca2pos20166203.1	2	20166203	9.11218e-05	0.45539	269	3.65106	0.33083
	Ca1pos22886919.1	1	22886919	0.000158392	0.453532	269	4.02209	0.374827		Ca1pos45295181.1	1	45295181	2.60881e-05	0.0483271	269	3.75389	0		Ca3pos2766368.1	3	2766368	6.92277e-05	0.355019	269	2.87335	3.71923e-07	3	Ca3pos2766368.1	3	2766368	6.92277e-05	0.355019	269	2.87335	3.71923e-07
	Ca1pos28124001.1	1	28124001	0.000133745	0.0576208	269	2.93992	0.187252		Ca1pos47230751.1	1	47230751	9.30455e-05	0.496283	269	-5.96551	2.90486		Ca4pos7916605.1	4	7916605	0.000104451	0.0836431	269	3.02205	0.120424	4	Ca4pos7916605.1	4	7916605	0.000104451	0.0836431	269	3.02205	0.120424
	Ca2pos10822979.1	2	10822979	8.45484e-05	0.111524	269	2.57577	0		Ca1pos47230776.1	1	47230776	0.000137912	0.486989	269	5.56019	0		Ca4pos8732683.1	4	8732683	7.40745e-05	0.171004	269	-2.01491	0	5	Ca4pos8732683.1	4	8732683	7.40745e-05	0.171004	269	-2.01491	0
	Ca3pos9733127.1	3	9733127	8.59923e-05	0.284387	269	-2.55088	0.256243		Ca2pos12381994.1	2	12381994	5.36703e-05	0.217472	269	-2.11734	1.07069		Ca4pos8818268.1	4	8818268	2.51223e-05	0.148699	269	2.30685	0	6	Ca4pos8818268.1	4	8818268	2.51223e-05	0.148699	269	2.30685	0
	Ca3pos15315616.1	3	15315616	6.15529e-05	0.0520446	269	-4.43679	1.58029e-07		Ca2pos20412450.1	2	20412450	7.12563e-05	0.0947955	269	1.9021	0.0630508		Ca4pos8897430.1	4	8897430	0.000114424	0.178439	269	1.94556	0	7	Ca4pos8897430.1	4	8897430	0.000114424	0.178439	269	1.94556	0
	Ca3pos15315625.1	3	15315625	0.000155651	0.0464684	269	-4.34256	0.060506		Ca2pos33854176.1	2	33854176	9.20335e-05	0.0446097	269	-3.63808	0		Ca4pos9195726.1	4	9195726	2.20439e-05	0.139405	269	2.24457	4.83938	8	Ca4pos9195726.1	4	9195726	2.20439e-05	0.139405	269	2.24457	4.83938
	Ca4pos14884865.1	4	14884865	0.000165069	0.0650558	269	2.91122	0.167858		Ca3pos2854997.1	3	2854997	0.000139227	0.492565	269	3.89045	0.772658		Ca4pos30543020.1	4	30543020	0.000133986	0.453532	269	-4.4797	0	9	Ca4pos30543020.1	4	30543020	0.000133986	0.453532	269	-4.4797	0
	Ca4pos14884892.1	4	14884892	2.53579e-05	0.063197	269	3.31929	1.20994e-09		Ca3pos6332467.1	3	6332467	0.000124424	0.0687732	269	2.9389	0.515139		Ca4pos35809754.1	4	35809754	6.43649e-05	0.457249	269	4.35179	3.0697	10	Ca4pos35809754.1	4	35809754	6.43649e-05	0.457249	269	4.35179	3.0697
	Ca4pos14890670.1	4	14890670	8.13554e-05	0.0557621	269	3.27507	0.597194		Ca3pos25992458.1	3	25992458	0.000118758	0.498141	269	-9.59141	2.09345		Ca5pos1941712.1	5	1941712	6.74018e-05	0.0929368	269	-3.36993	1.5986	11	Ca5pos1941712.1	5	1941712	6.74018e-05	0.0929368	269	-3.36993	1.5986
	Ca4pos14894073.1	4	14894073	7.37526e-05	0.0780669	269	3.01922	0.813083		Ca4pos23270279.1	4	23270279	0.000103496	0.35316	269	-2.24095	0.152131		Ca5pos5415849.1	5	5415849	3.71995e-05	0.0576208	269	4.25781	0.691407	12	Ca5pos5415849.1	5	5415849	3.71995e-05	0.0576208	269	4.25781	0.691407
	Ca4pos14894080.1	4	14894080	0.000143598	0.0780669	269	-2.8927	0.143024		Ca4pos27272078.1	4	27272078	0.000121727	0.0613383	269	-3.10251	0.995366		Ca6pos12311862.1	6	12311862	0.000107912	0.0483271	269	4.3097	0.617187	13	Ca6pos12311862.1	6	12311862	0.000107912	0.0483271	269	4.3097	0.617187
	Ca4pos14900021.1	4	14900021	0.000104091	0.070632	269	3.0842	0.0137502		Ca4pos40396490.1	4	40396490	0.000111426	0.0650558	269	-2.50213	0.555293		Ca6pos42565470.1	6	42565470	5.02186e-05	0.234201	269	2.68868	0	14	Ca6pos42565470.1	6	42565470	5.02186e-05	0.234201	269	2.68868	0
	Ca4pos24485124.1	4	24485124	2.77048e-05	0.157993	269	-2.8989	0.50059		Ca4pos40396492.1	4	40396492	4.68918e-05	0.063197	269	-2.66117	0.145055		Ca6pos47675915.1	6	47675915	1.35566e-05	0.111524	269	3.48072	0.619072	15	Ca6pos47675915.1	6	47675915	1.35566e-05	0.111524	269	3.48072	0.619072
	Ca4pos28050985.1	4	28050985	0.000154344	0.20632	269	-2.32523	4.03461e-06		Ca5pos951587.1	5	951587	2.38011e-05	0.0483271	269	3.78784	0.58281		Ca6pos47675923.1	6	47675923	3.74254e-05	0.107807	269	3.32613	0.125758	16	Ca6pos47675923.1	6	47675923	3.74254e-05	0.107807	269	3.32613	0.125758
	Ca5pos3296731.1	5	3296731	0.000151885	0.0762082	269	-2.76651	1.07787e-08		Ca6pos16952323.1	6	16952323	5.13355e-05	0.0892193	269	-2.79444	1.10266		Ca6pos52464995.1	6	52464995	5.38359e-05	0.267658	269	2.71155	1.2077	17	Ca6pos52464995.1	6	52464995	5.38359e-05	0.267658	269	2.71155	1.2077
	Ca5pos10953477.1	5	10953477	2.24003e-05	0.13197	269	-3.16034	0.424094		Ca6pos25812117.1	6	25812117	0.000143353	0.48513	269	-5.88926	0.345198		Ca7pos30981168.1	7	30981168	9.33053e-05	0.126394	269	-2.26428	0.211855	18	Ca7pos30981168.1	7	30981168	9.33053e-05	0.126394	269	-2.26428	0.211855
	Ca6pos23040914.1	6	23040914	0.000106812	0.0260223	269	-6.02611	0		Ca6pos42565382.1	6	42565382	4.05135e-05	0.20632	269	2.19973	1.22382e-06		Ca7pos40493709.1	7	40493709	4.56302e-05	0.143123	269	3.00859	0.351104	19	Ca7pos40493709.1	7	40493709	4.56302e-05	0.143123	269	3.00859	0.351104
	Ca6pos23040924.1	6	23040924	0.000106812	0.0260223	269	-6.02611	0.185408		Ca8pos12985350.1	8	12985350	3.80216e-05	0.498141	269	-7.9565	0.402307		Ca8pos13063927.1	8	13063927	0.000135849	0.0892193	269	-3.32069	1.19327	20	Ca8pos13063927.1	8	13063927	0.000135849	0.0892193	269	-3.32069	1.19327
