# Supplementary material for: Genome-wide association mapping identifies novel SNPs for root nodulation and agronomic traits in chickpea
Source: Frontiers journal article supplement (doi:10.3389/fpls.2024.1395938), 2024-10-15
Supplement: Data_Sheet_1.zip [file Data_Sheet_1.zip]

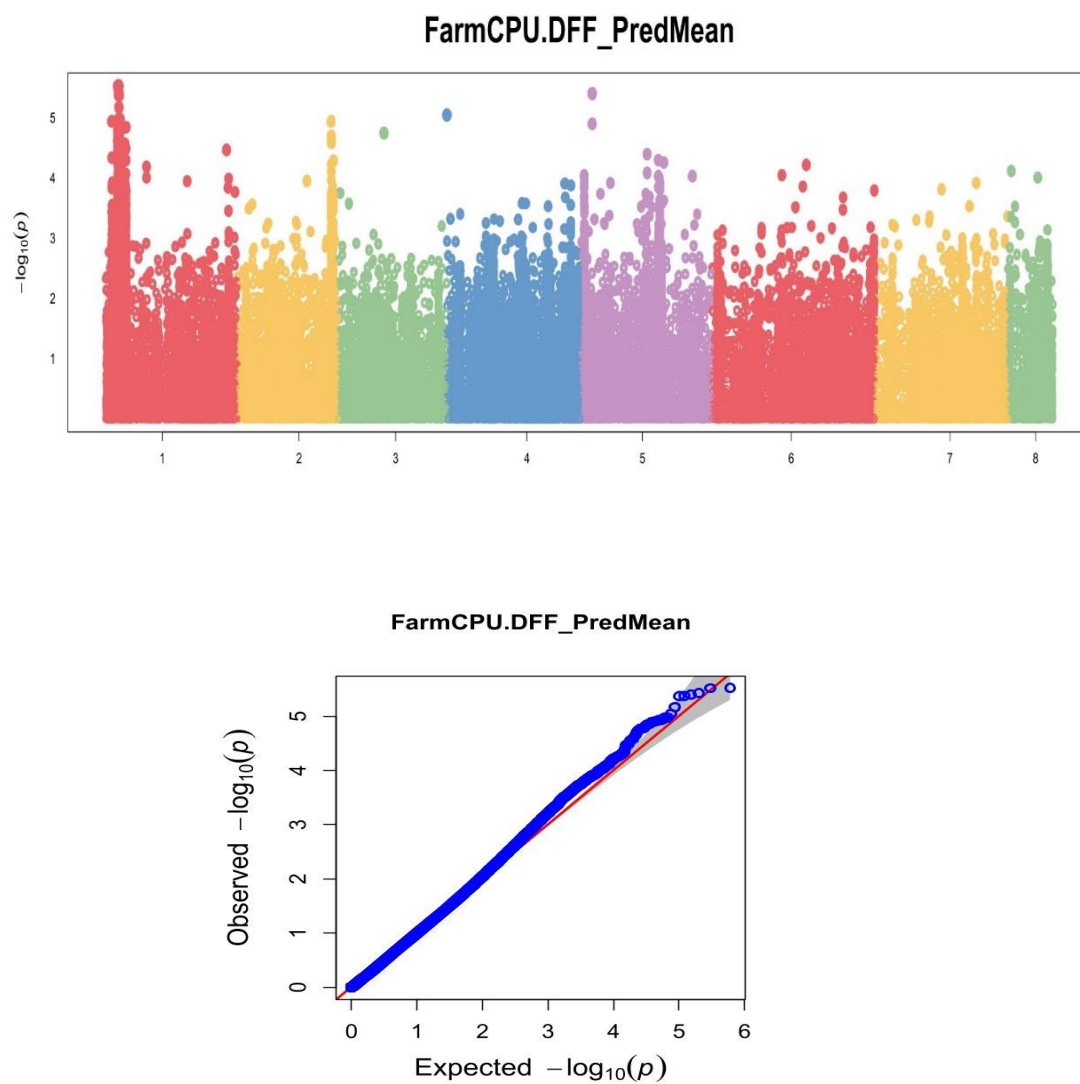

Supplementary Figure6a: Manhattan plot illustrating SNPs linked to Days fifty percentage flowering along with their corresponding statistical significance represented by Q-Q plot.

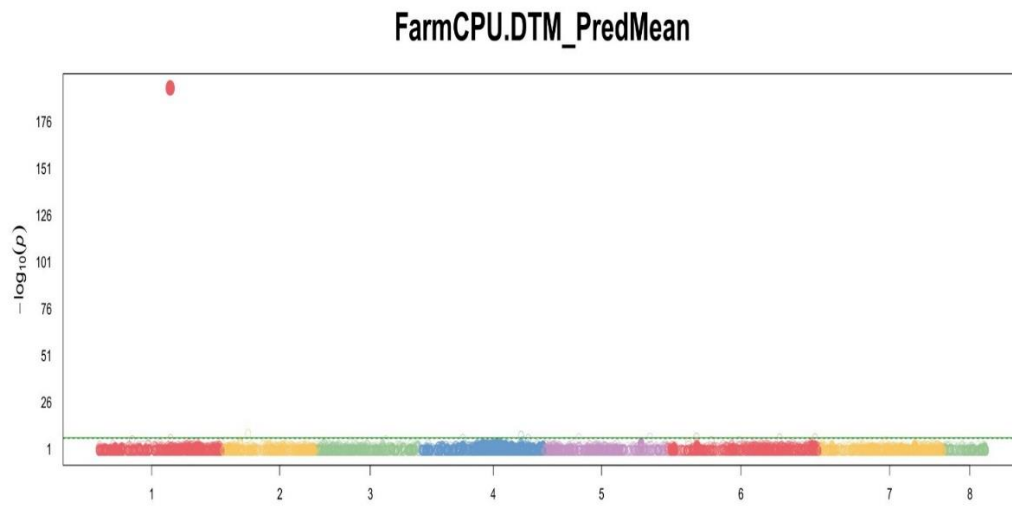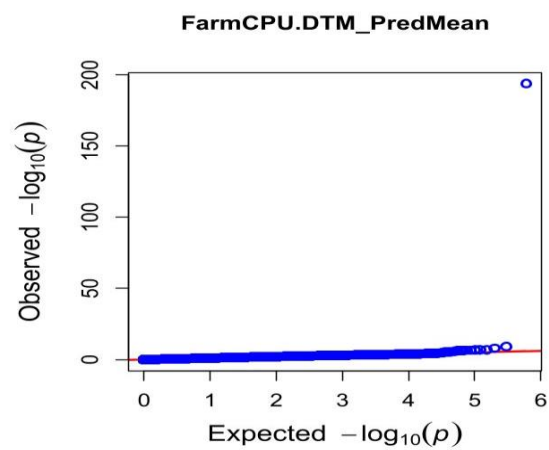

Supplementary figure6b: Manhattan plot illustrating SNPs linked to Days to maturity along with their corresponding statistical significance represented by Q-Q plot.

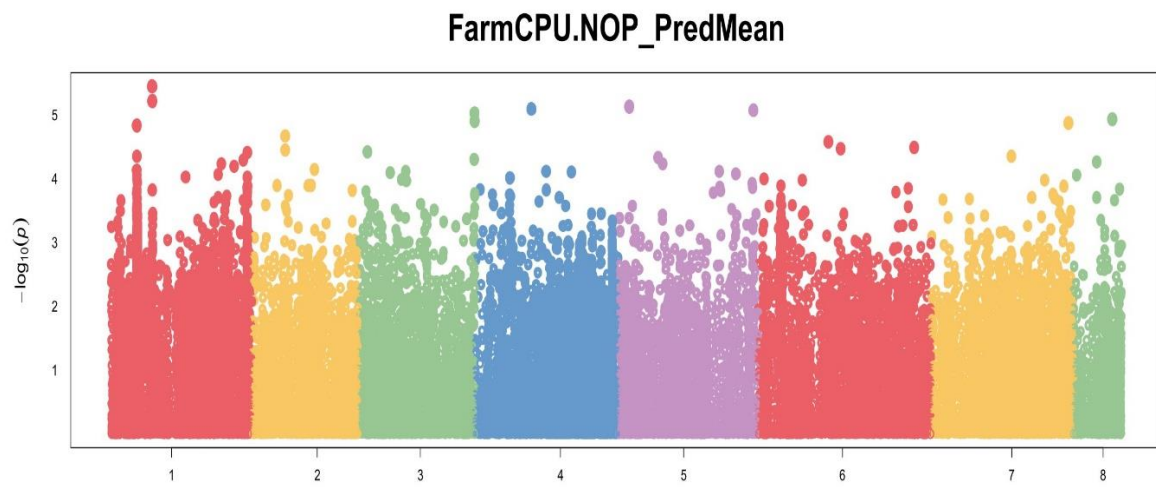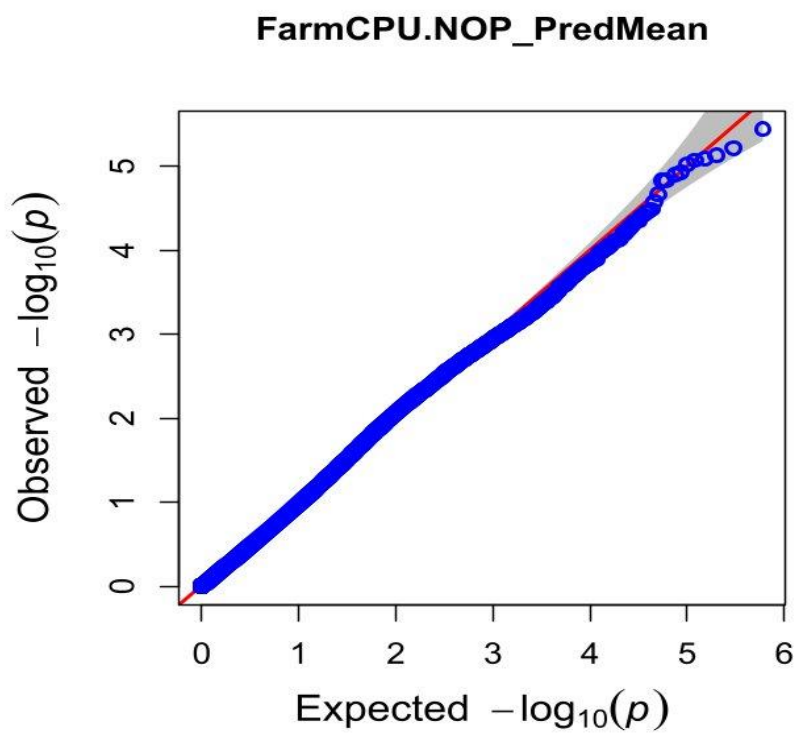

Supplementary Figure6c: Manhattan plot illustrating SNPs linked to number of pods along with their corresponding statistical significance represented by Q-Q plot.

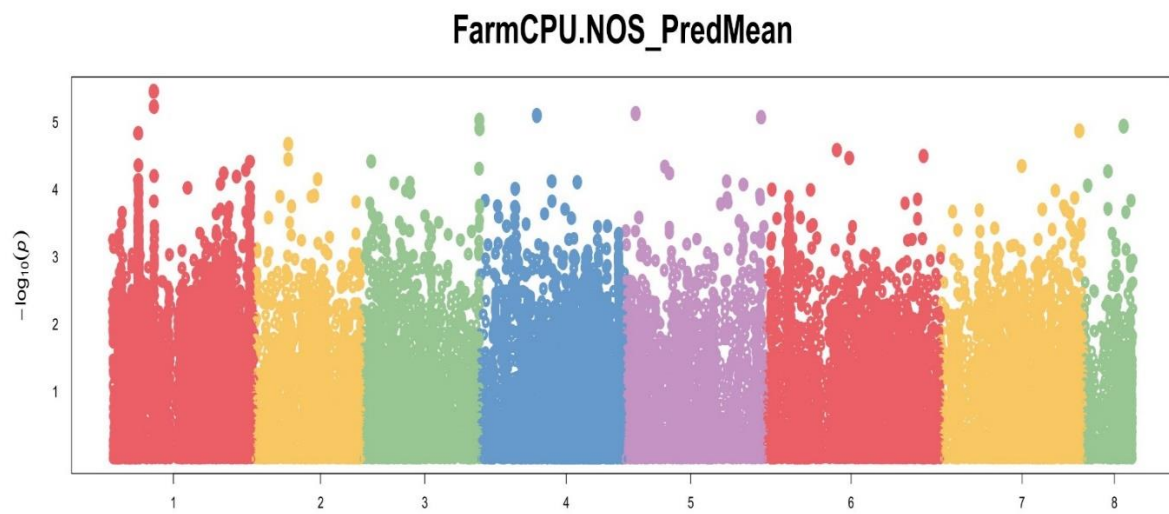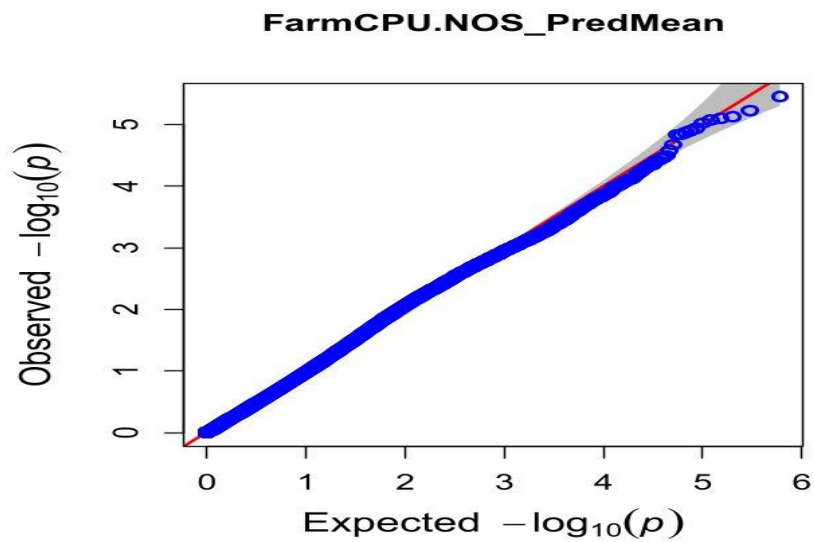

Supplementary Figure6d: Manhattan plot illustrating SNPs linked to number of seeds along with their corresponding statistical significance represented by Q-Q plot

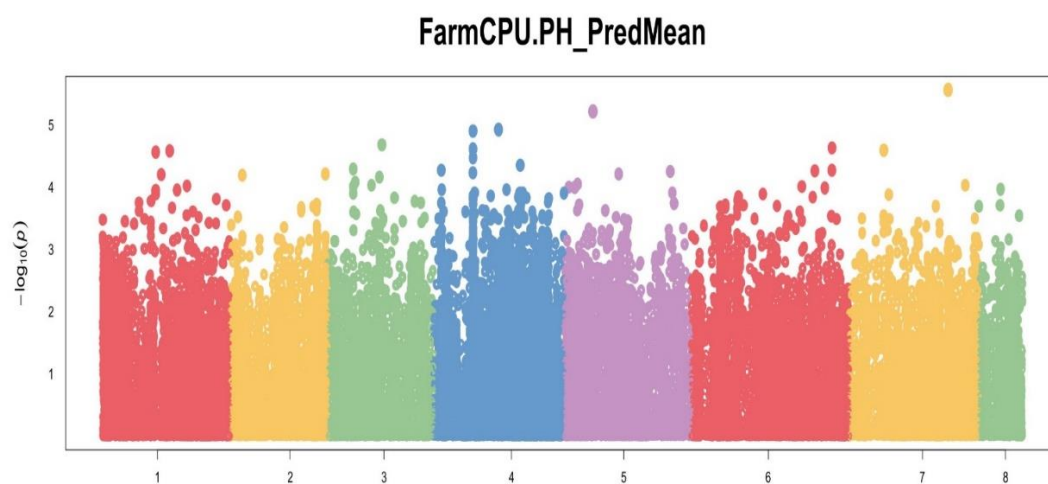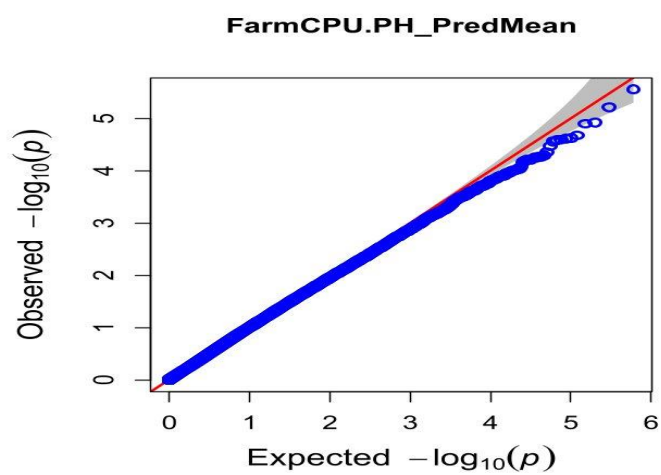

Supplementary Figure6e: Manhattan plot illustrating SNPs linked to plant height along with their corresponding statistical significance represented by Q-Q plot

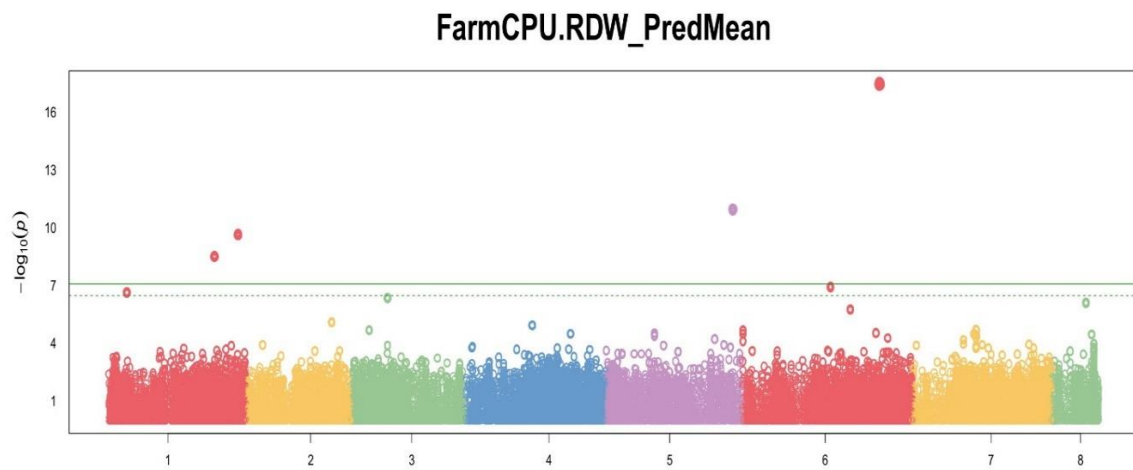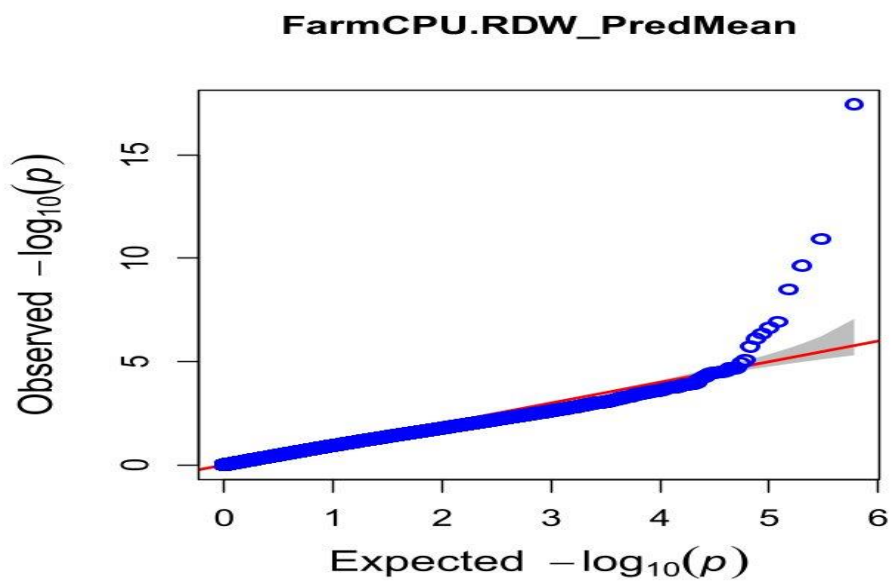

Supplementary Figure6f: Manhattan plot illustrating SNPs linked to root dry weight with their corresponding statistical significance represented by Q-Q plot

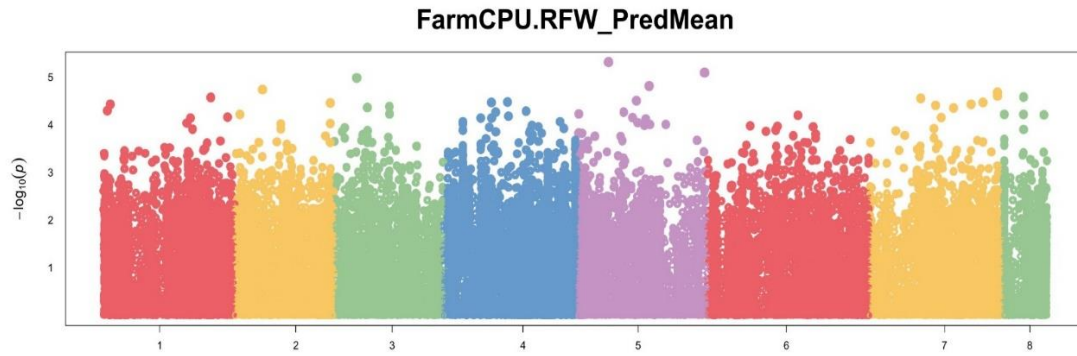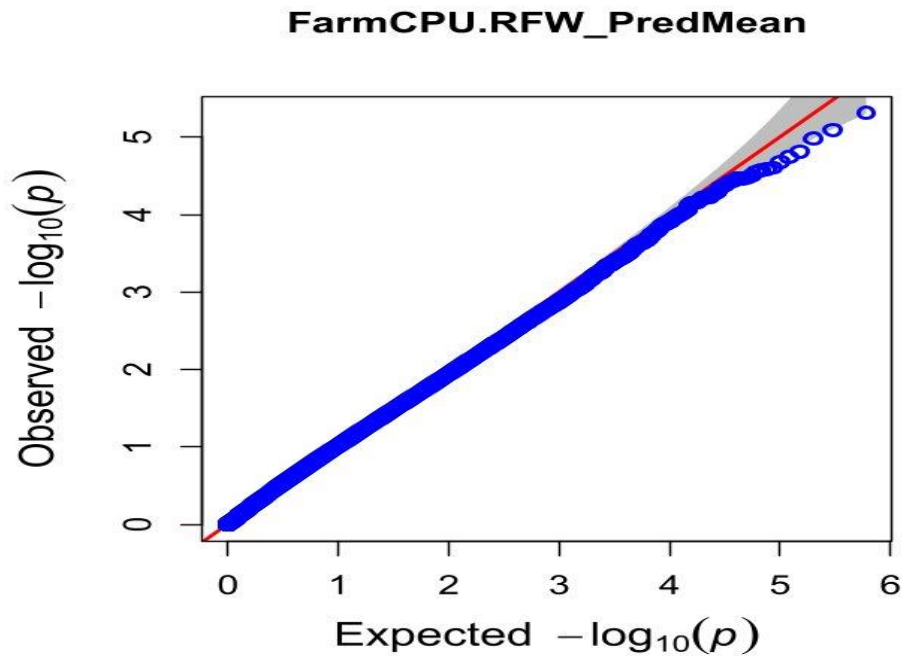

Supplementary Figure6g: Manhattan plot illustrating SNPs linked to root fresh weight with their corresponding statistical significance represented by Q-Q plot

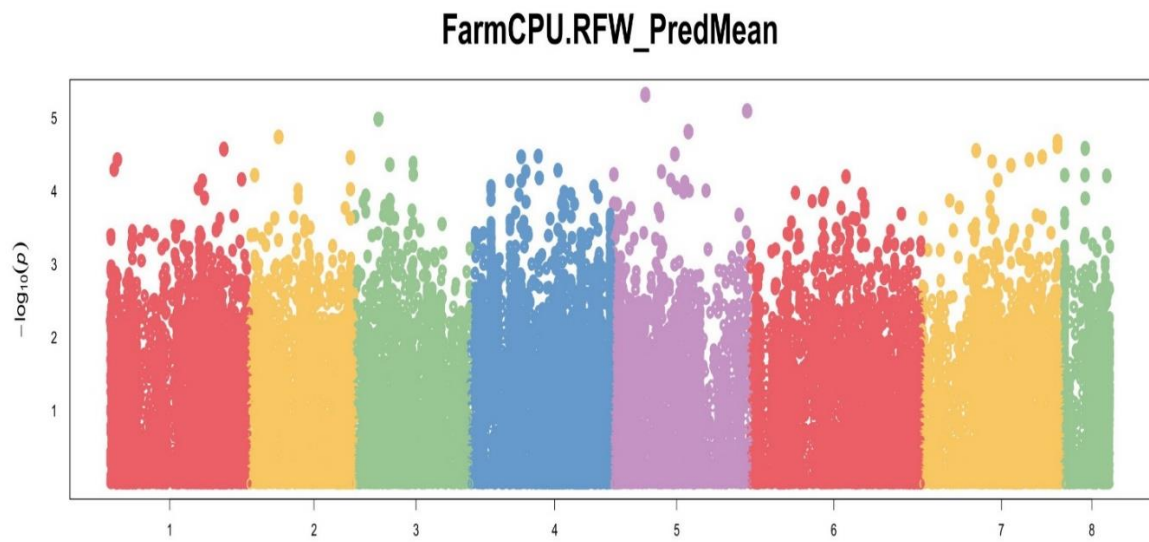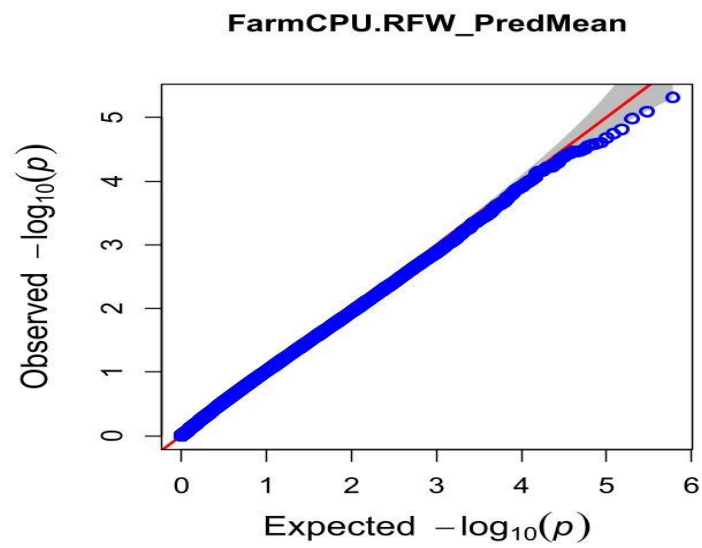

Supplementary Figure6g: Manhattan plot illustrating SNPs linked to root fresh weight with their corresponding statistical significance represented by Q-Q plot

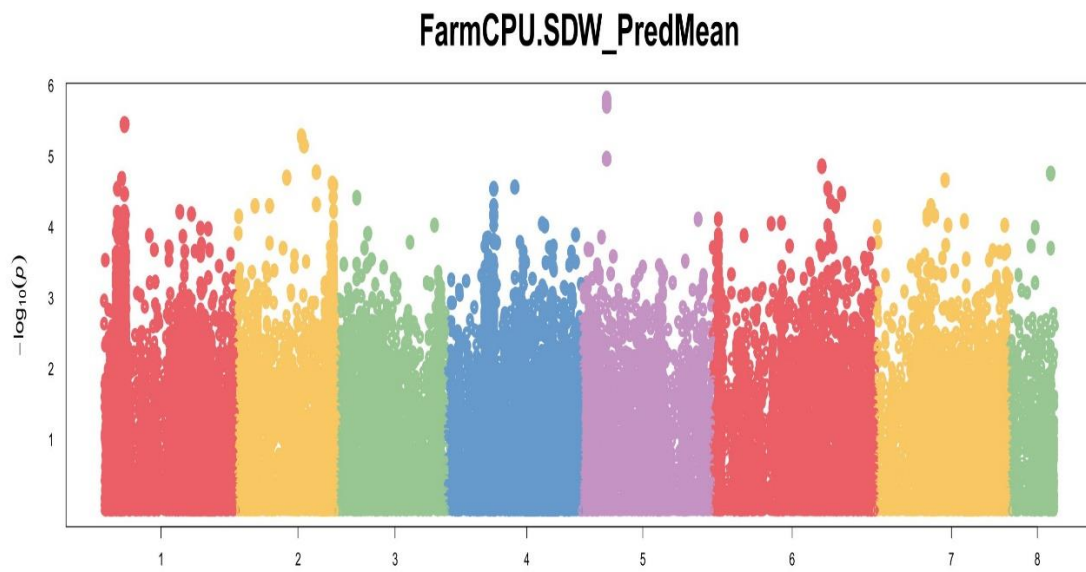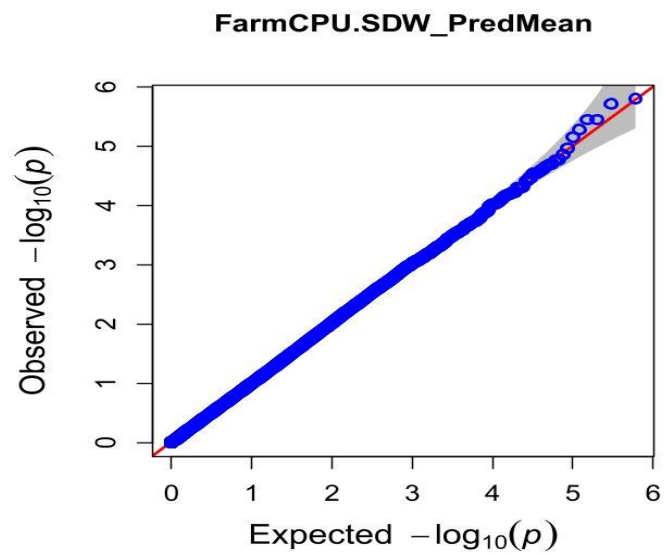

Supplementary Figure6h: Manhattan plot illustrating SNPs linked to shoot dry weight with their corresponding statistical significance represented by Q-Q plot

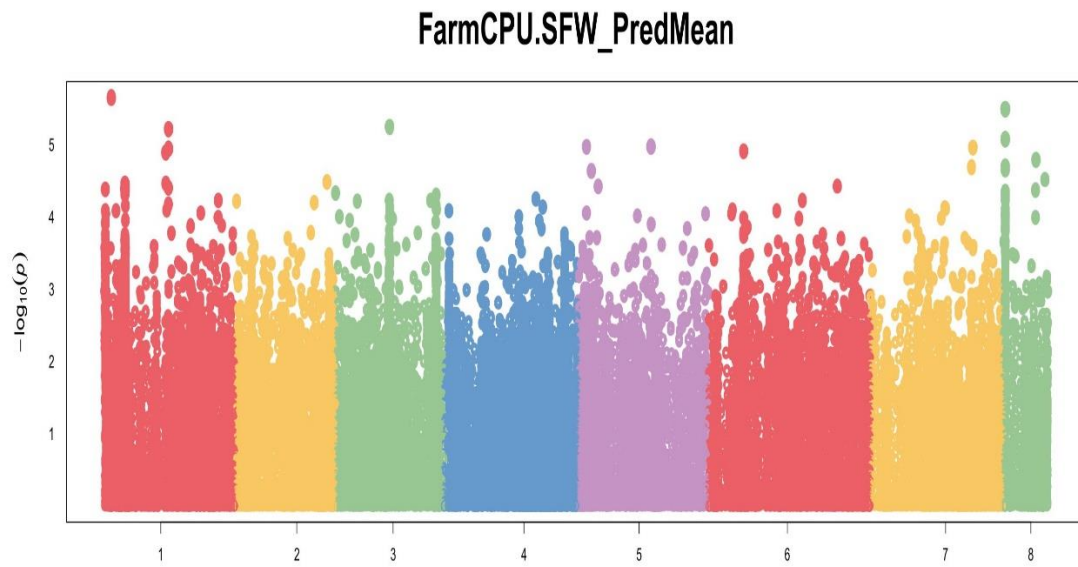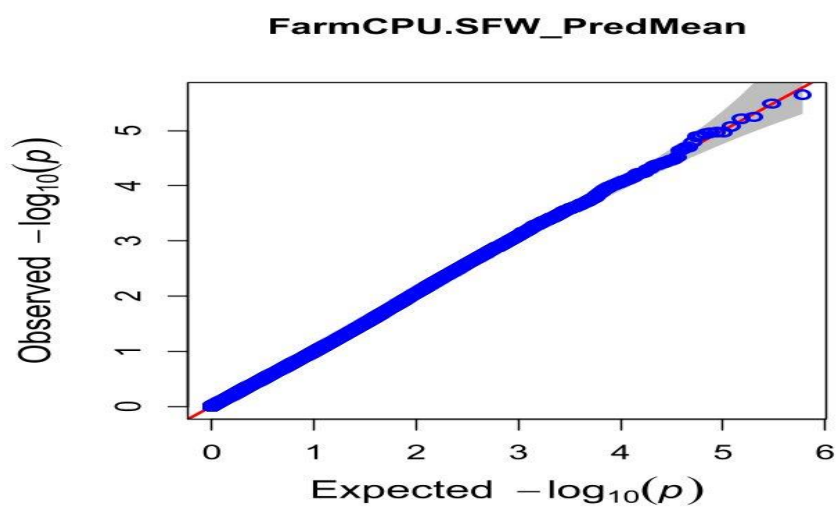

Supplementary Figure6i: Manhattan plot illustrating SNPs linked to shoot fresh weight with their corresponding statistical significance represented by Q-Q plot

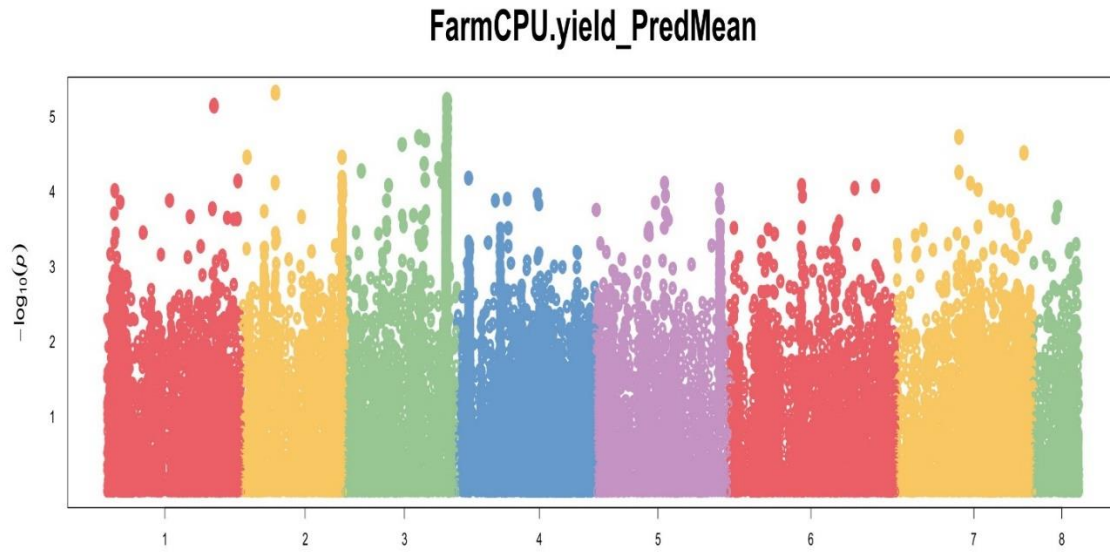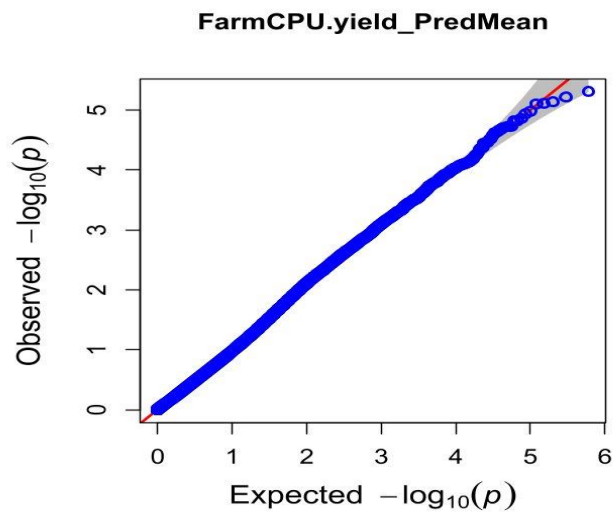

Supplementary Figure6j: Manhattan plot illustrating SNPs linked to yield with their corresponding statistical significance represented by Q-Q plot

**Supplementary Figure6:Manhattan plot illustrating SNPs linked to specific chickpea traits, along with their corresponding statistical significance represented by Q-Q plot for location 2 identified from FarmCPU model**

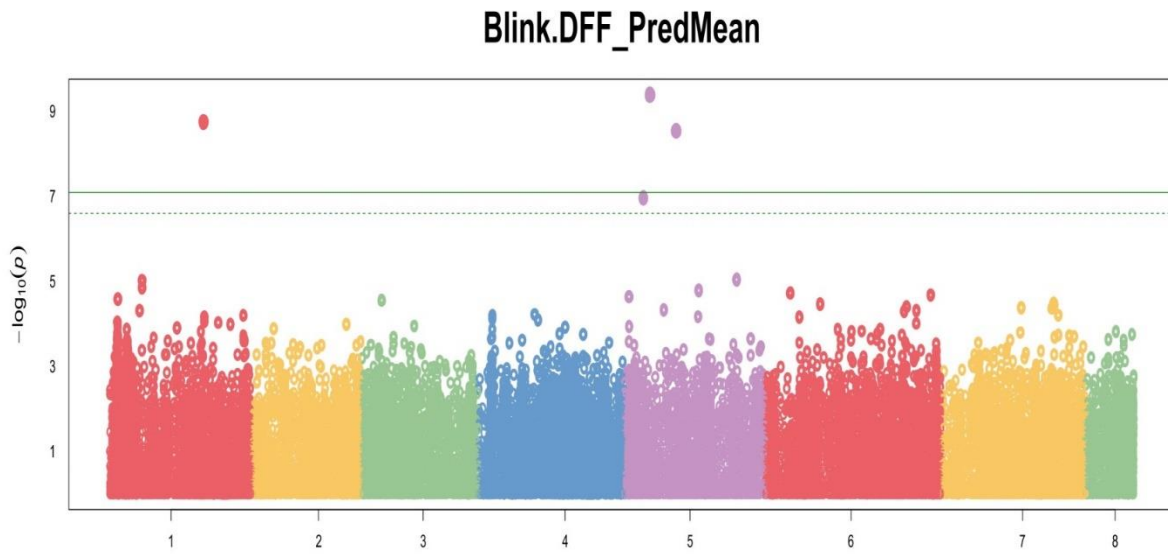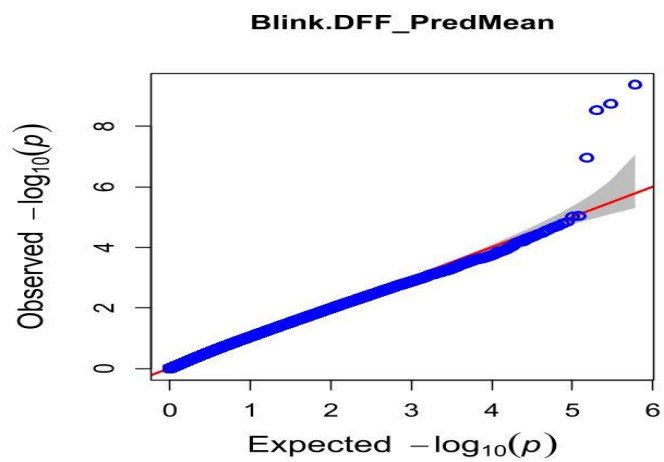

Supplementary Figure7a: Manhattan plot illustrating SNPs linked to Days fifty percentage flowering along with their corresponding statistical significance represented by Q-Q plot.

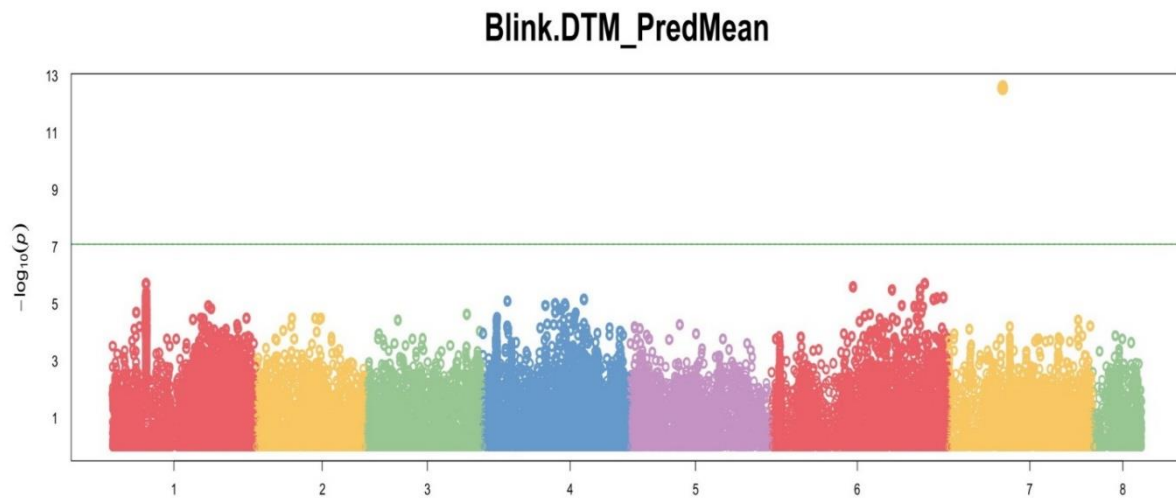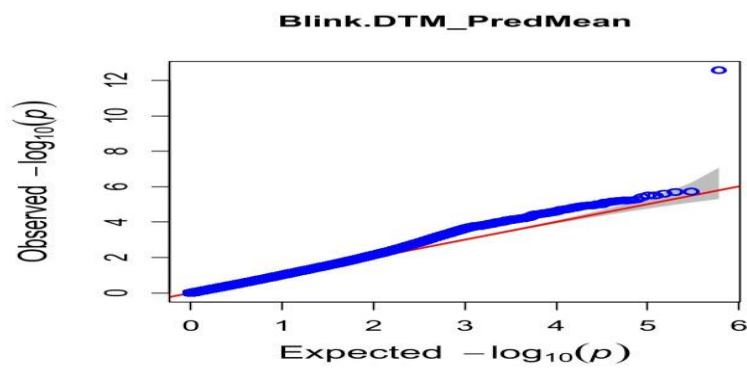

Supplementary Figure7b: Manhattan plot illustrating SNPs linked to Days to maturity along with their corresponding statistical significance represented by Q-Q plot

**Blink.NOP\_PredMean**

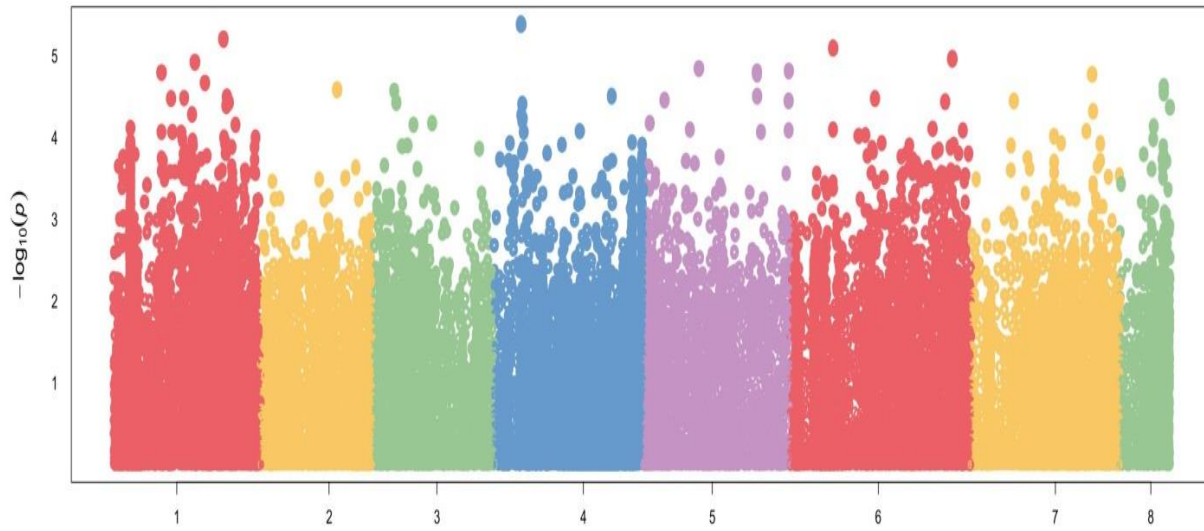

**Blink.NOP\_PredMean**

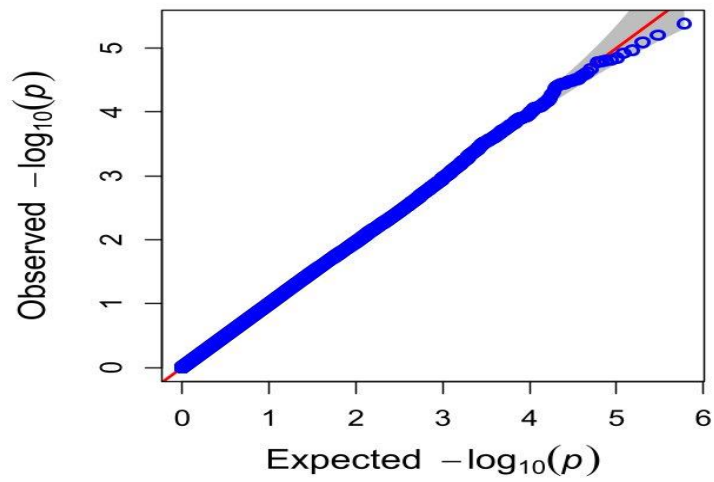

Supplementary Figure7c: Manhattan plot illustrating SNPs linked to number of pods along with their corresponding statistical significance represented by Q-Q plot.

**Blink.NOS\_PredMean**

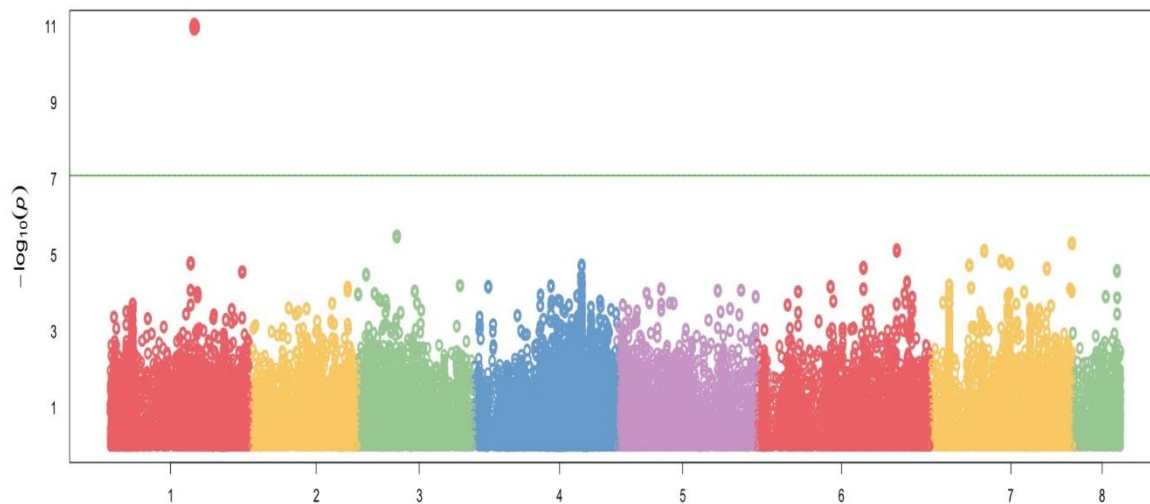

**Blink.NOS\_PredMean**

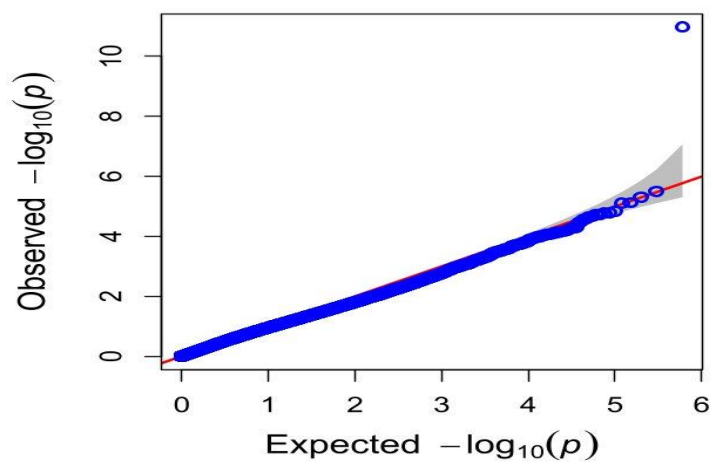

Supplementary Figure7d: Manhattan plot illustrating SNPs linked to number of seeds along with their corresponding statistical significance represented by Q-Q plot.

**Blink.PH\_PredMean**

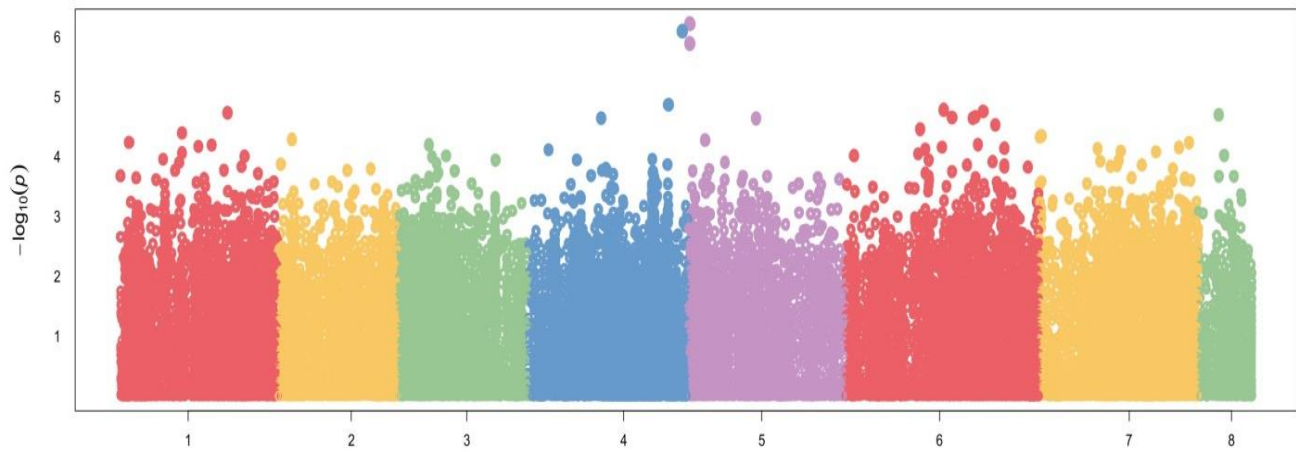

**Blink.PH\_PredMean**

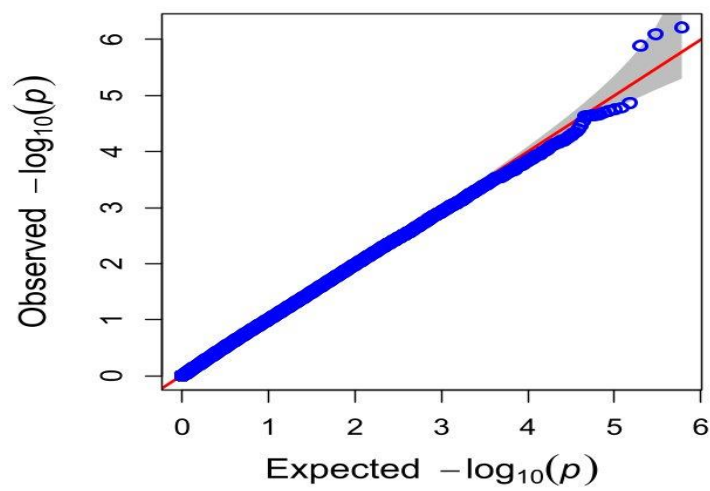

Supplementary Figure7e: Manhattan plot illustrating SNPs linked to plant height along with their corresponding statistical significance represented by Q-Q plot

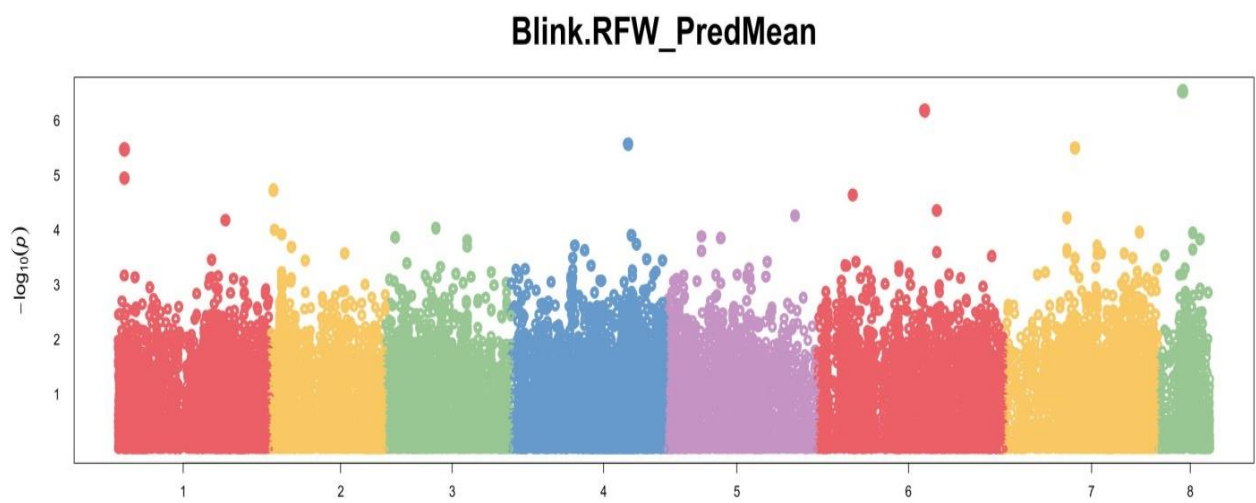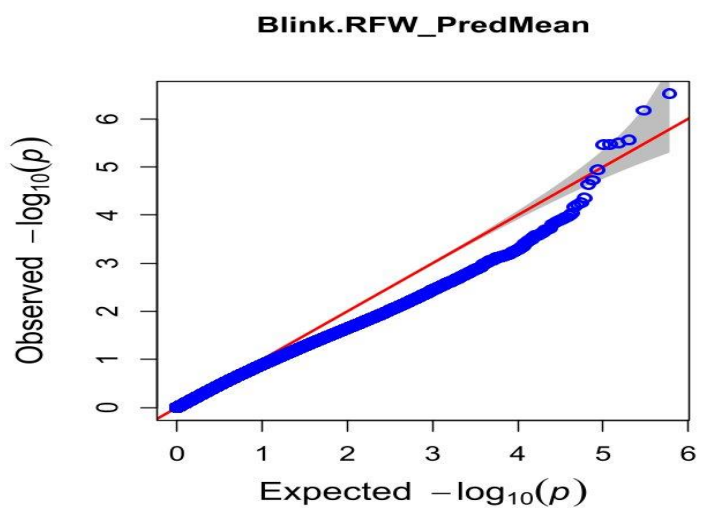

Supplementary Figure7f:Manhattan plot illustrating SNPs linked to root dry weight with their corresponding statistical significance represented by Q-Q plot

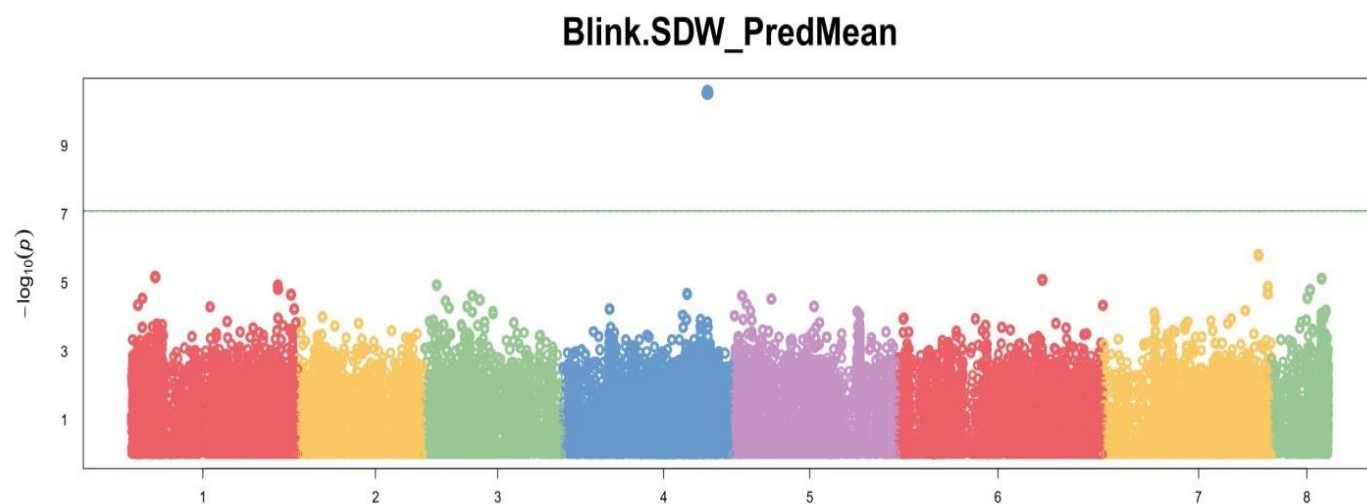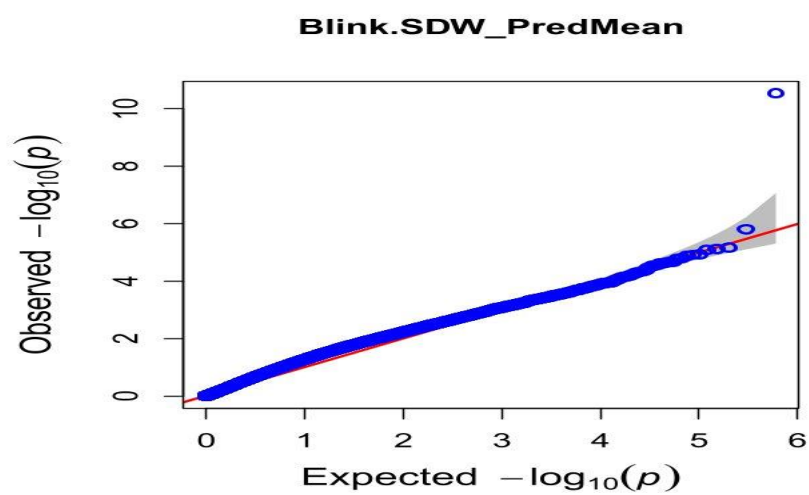

Supplementary Figure7h: Manhattan plot illustrating SNPs linked to r shoot dry weight with their corresponding statistical significance represented by Q-Q plot

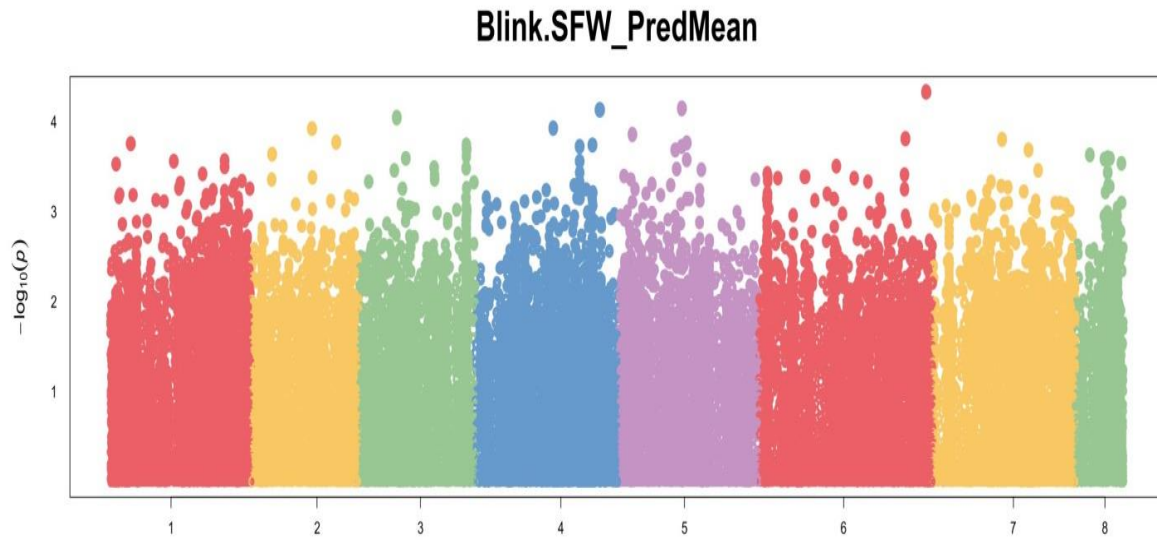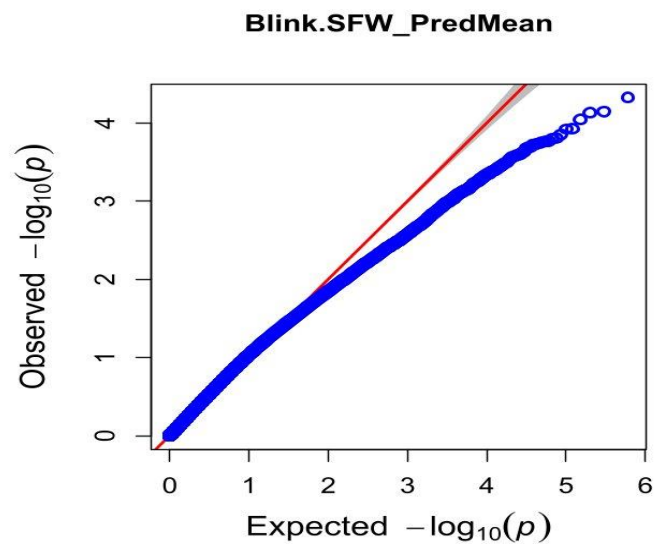

Supplementary Figure7i:Manhattan plot illustrating SNPs linked to shoot fresh weight with their corresponding statistical significance represented by Q-Q plot

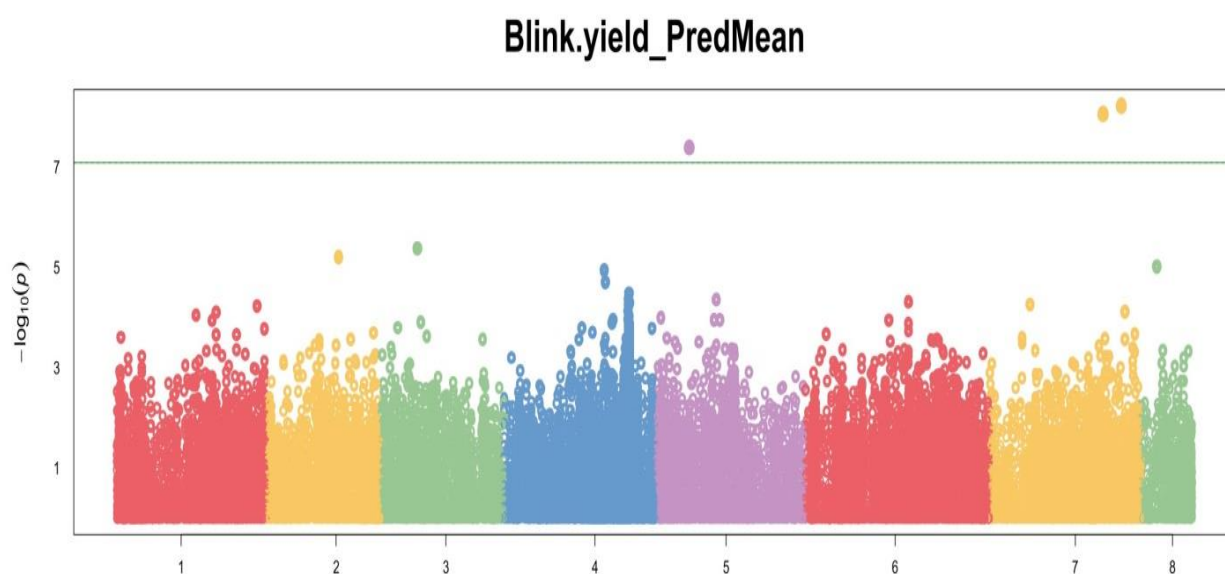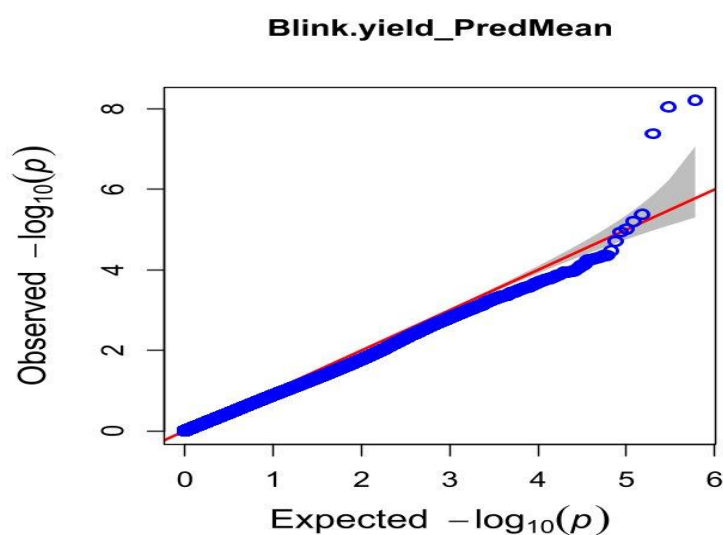

Supplementary Figure7j: Manhattan plot illustrating SNPs linked to yield with their corresponding statistical significance represented by Q-Q plot

**Supplementary Figure7: Manhattan plot illustrating SNPs linked to specific chickpea traits, along with their corresponding statistical significance represented by Q-Q plot for location 3 identified from Blink model**

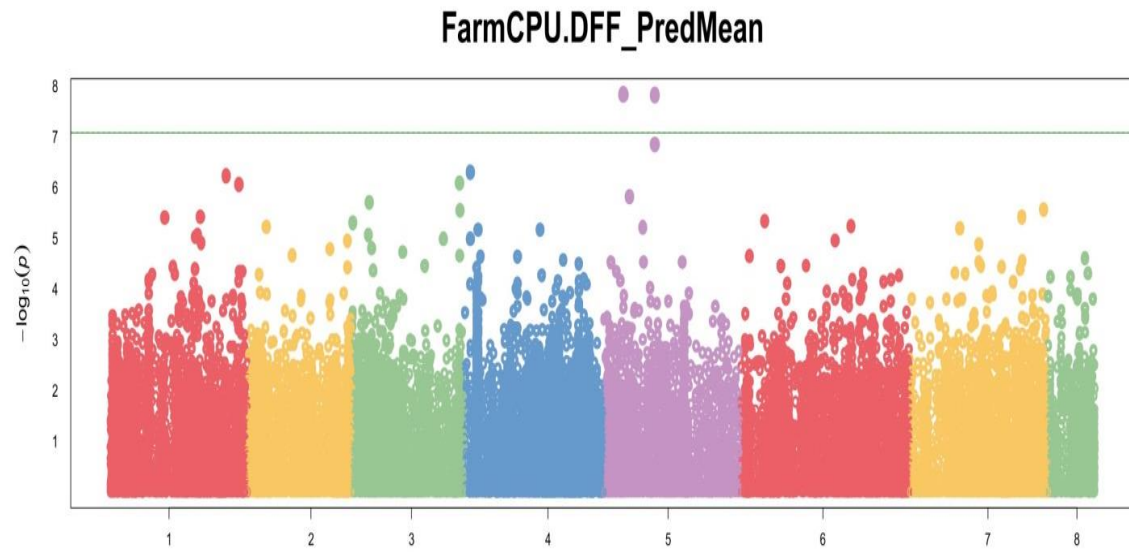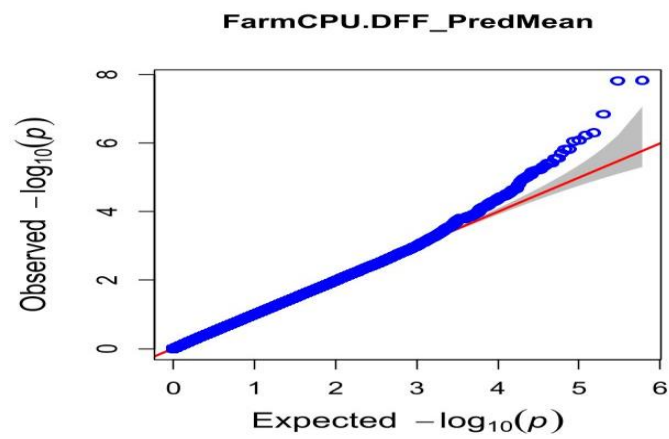

Supplementary Figure8a:Manhattan plot illustrating SNPs linked to Days fifty percentage flowering along with their corresponding statistical significance represented by Q-Q plot.

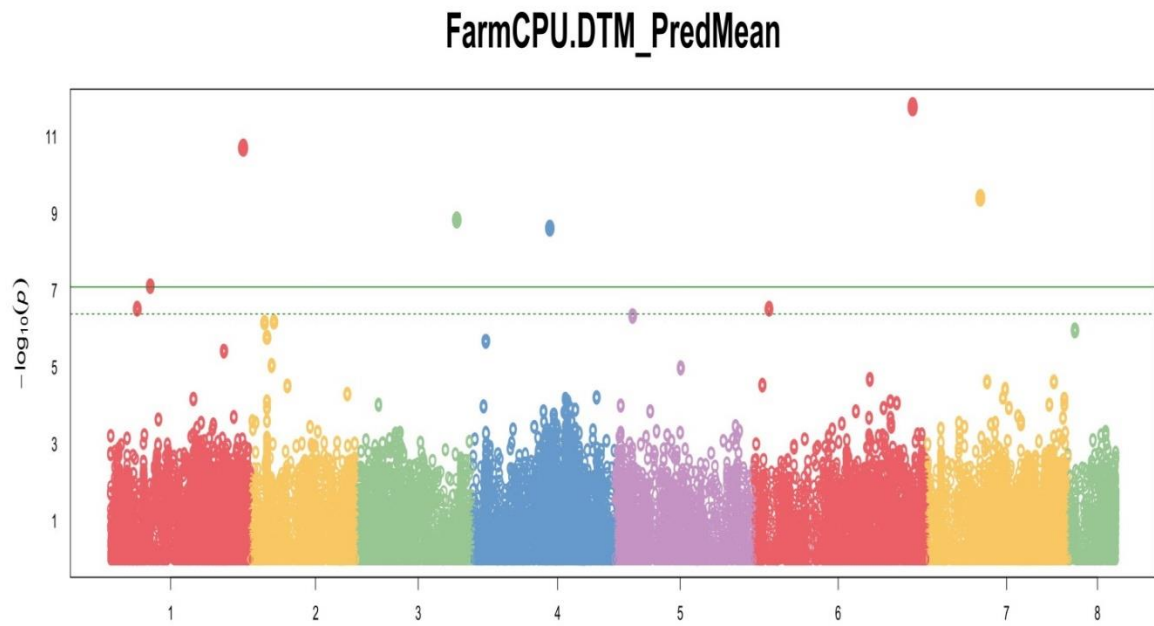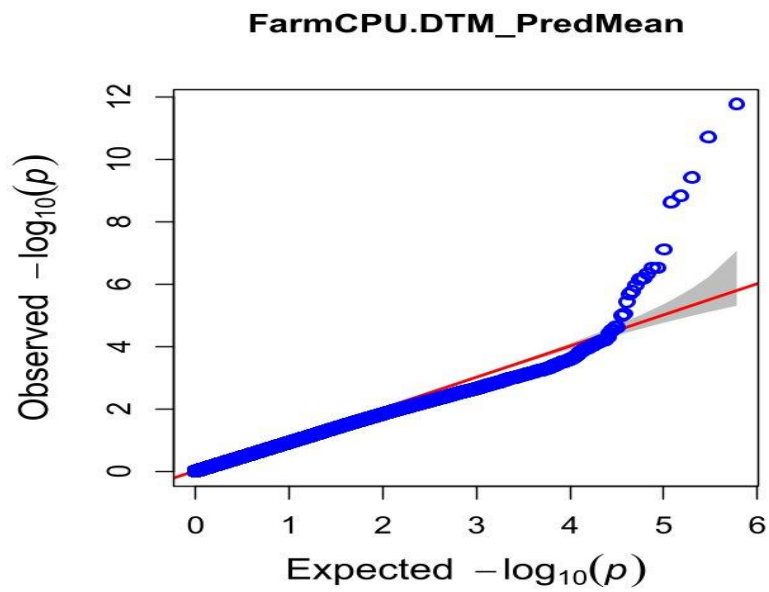

Supplementary Figure8b: Manhattan plot illustrating SNPs linked to Days to maturity along with their corresponding statistical significance represented by Q-Q plot

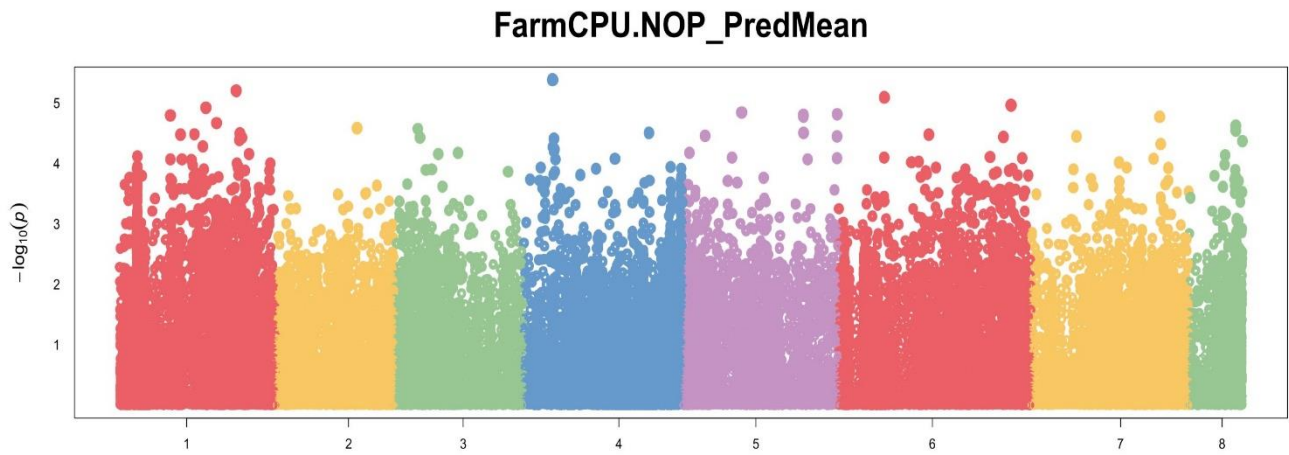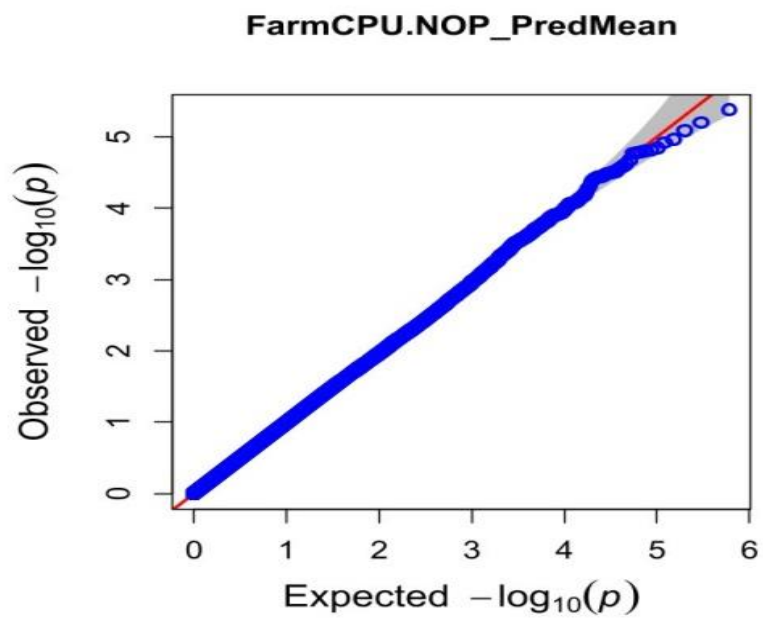

Supplementary Figure8c:Manhattan plot illustrating SNPs linked to number of pods along with their corresponding statistical significance represented by Q-Q plot

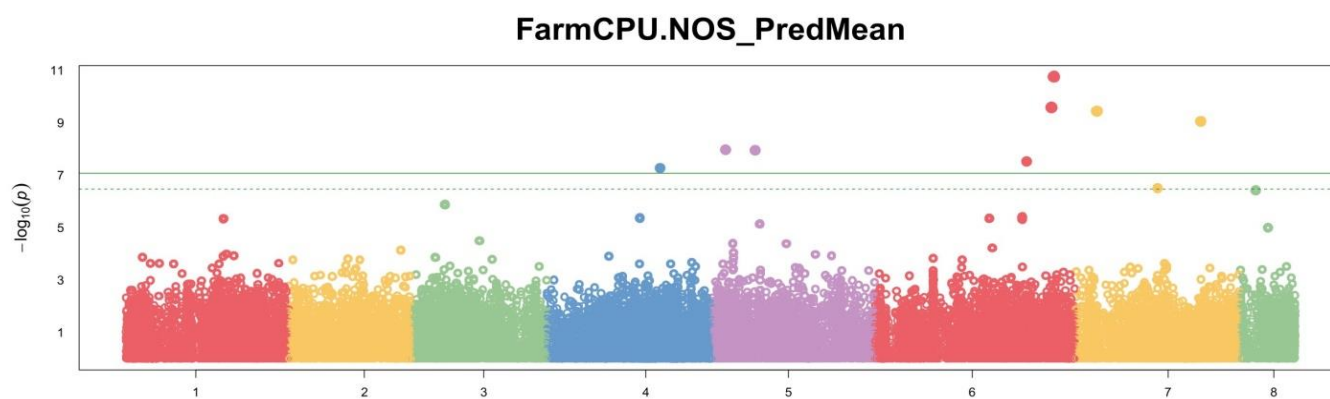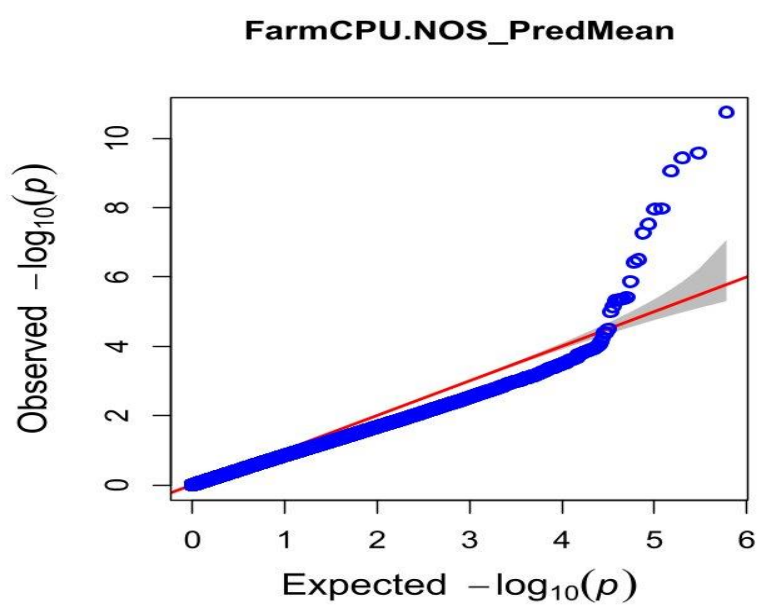

Supplementary Figure8d: Manhattan plot illustrating SNPs linked to number of seeds along with their corresponding statistical significance represented by Q-Q plot

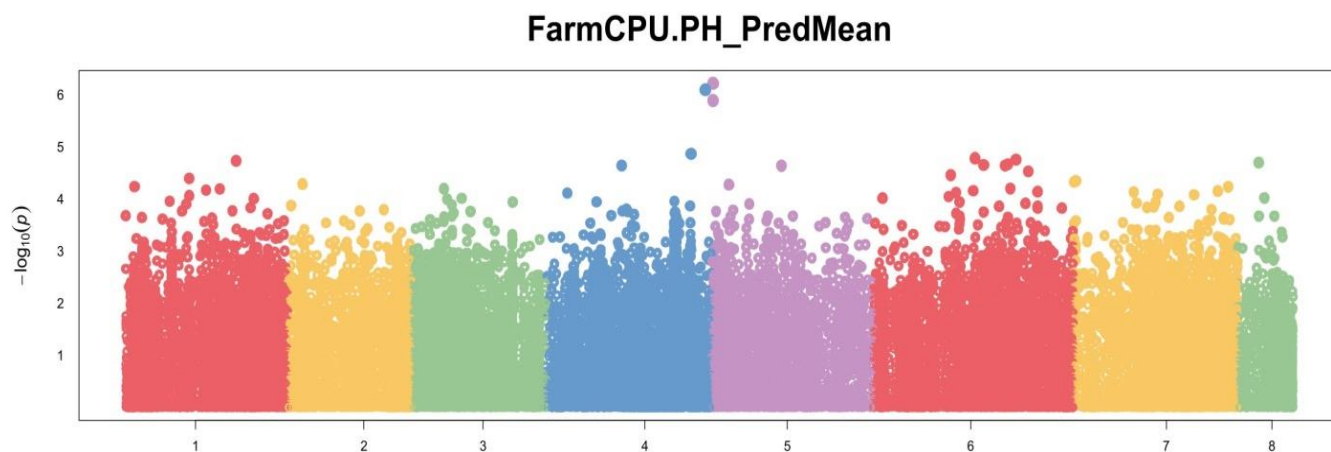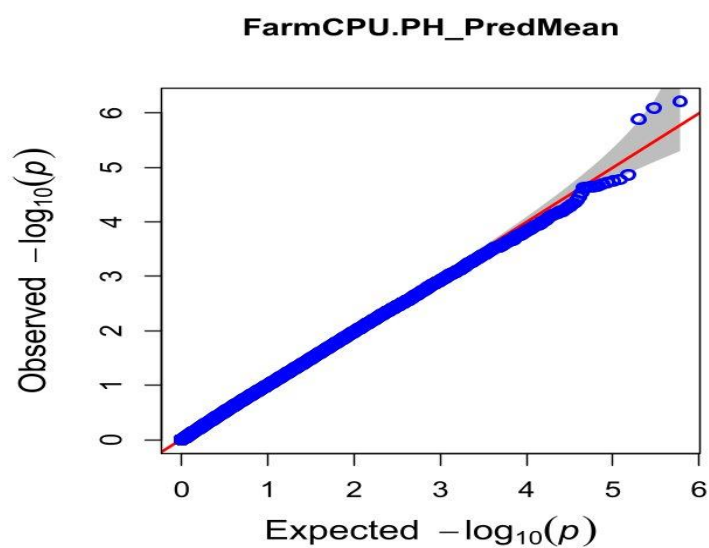

Supplementary Figure8e: Manhattan plot illustrating SNPs linked to plant height along with their corresponding statistical significance represented by Q-Q plot

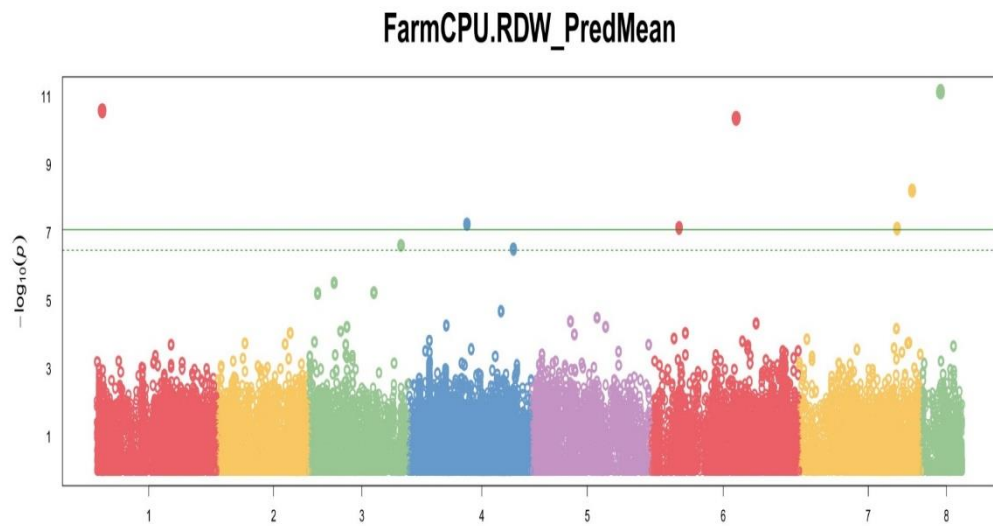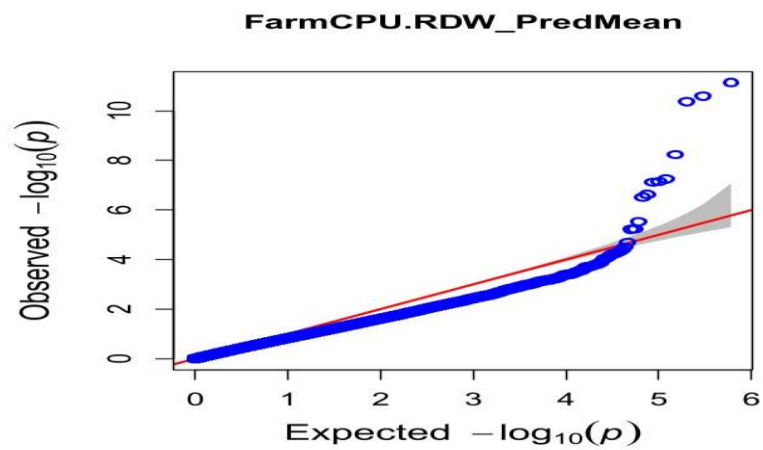

Supplementary Figure8f:Manhattan plot illustrating SNPs linked to root dry weight with their corresponding statistical significance represented by Q-Q plot

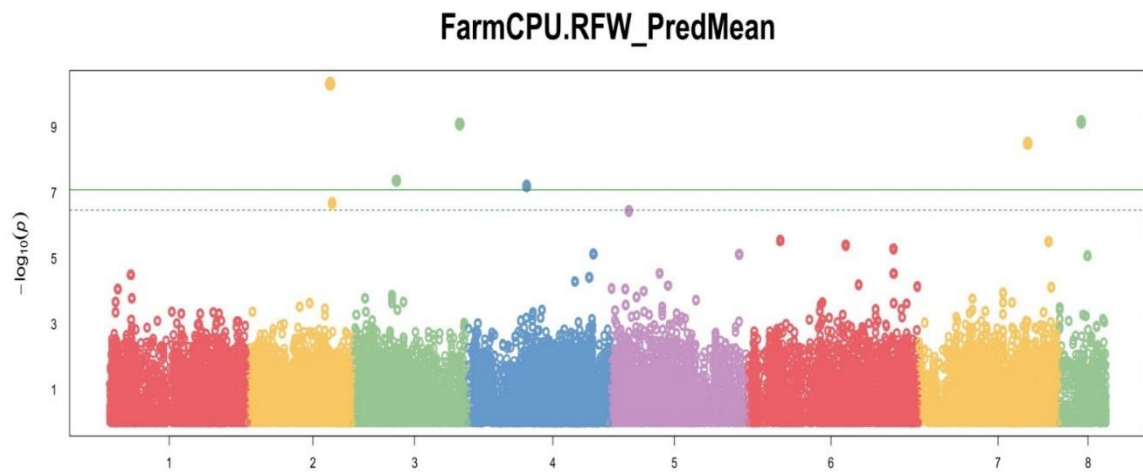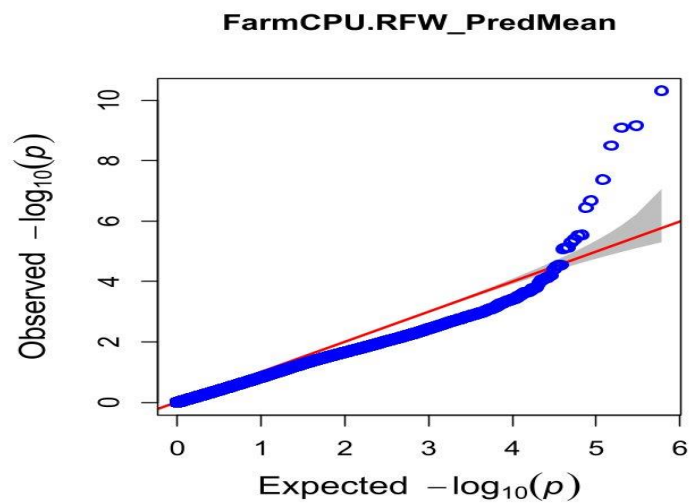

Supplementary Figure8g: Manhattan plot illustrating SNPs linked to root fresh weight with their corresponding statistical significance represented by Q-Q plot

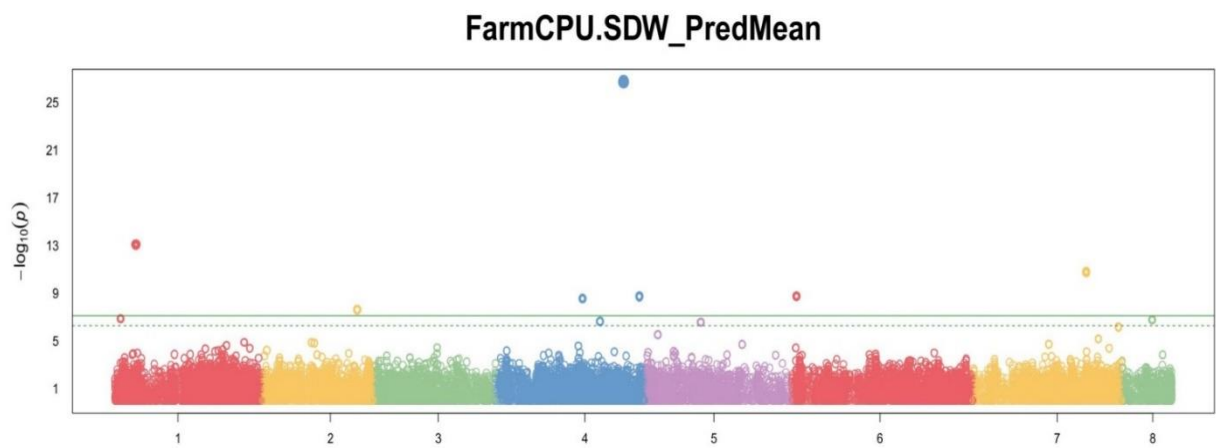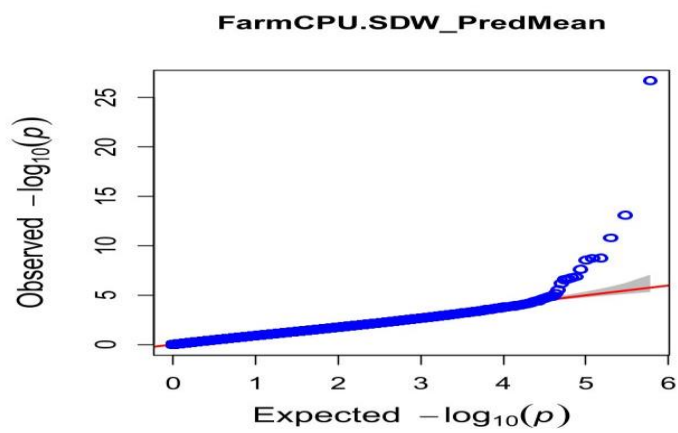

Supplementary Figure8h: Manhattan plot illustrating SNPs linked to shoot dry weight with their corresponding statistical significance represented by Q-Q plot

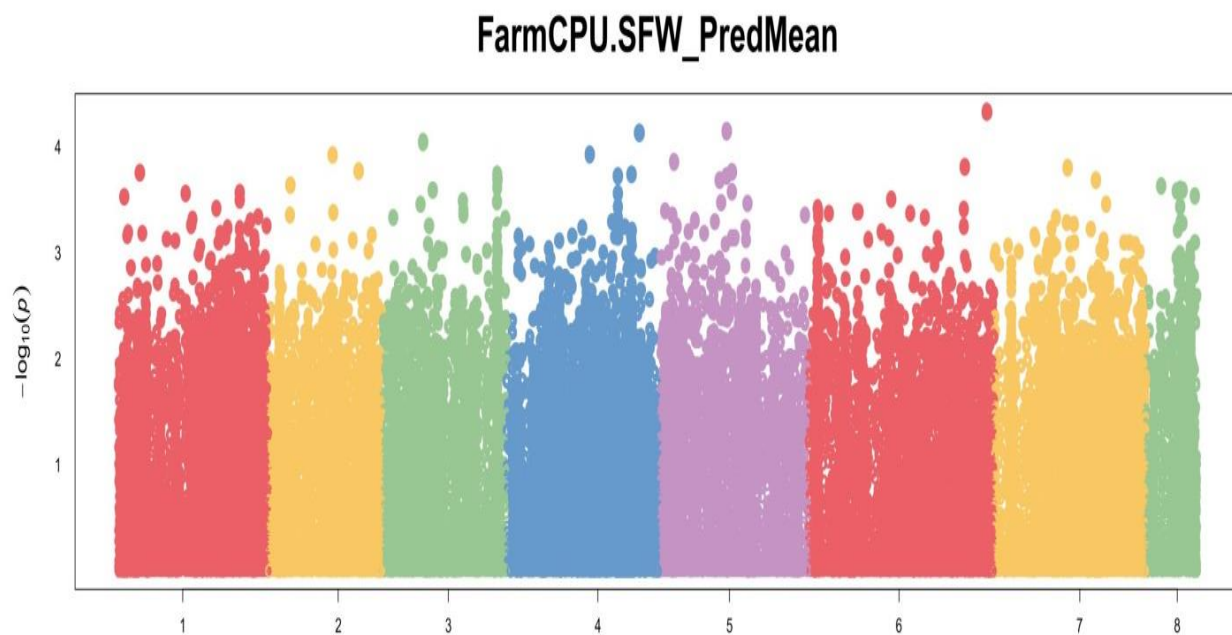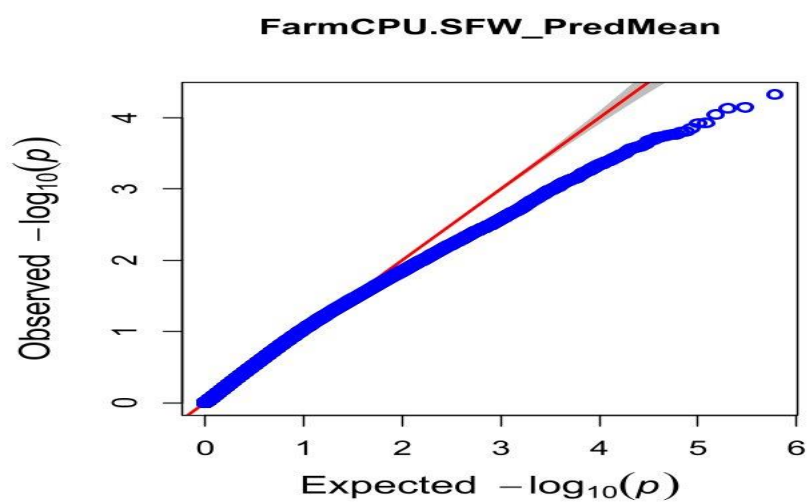

Supplementary Figure8i: Manhattan plot illustrating SNPs linked to shoot fresh weight with their corresponding statistical significance represented by Q-Q plot

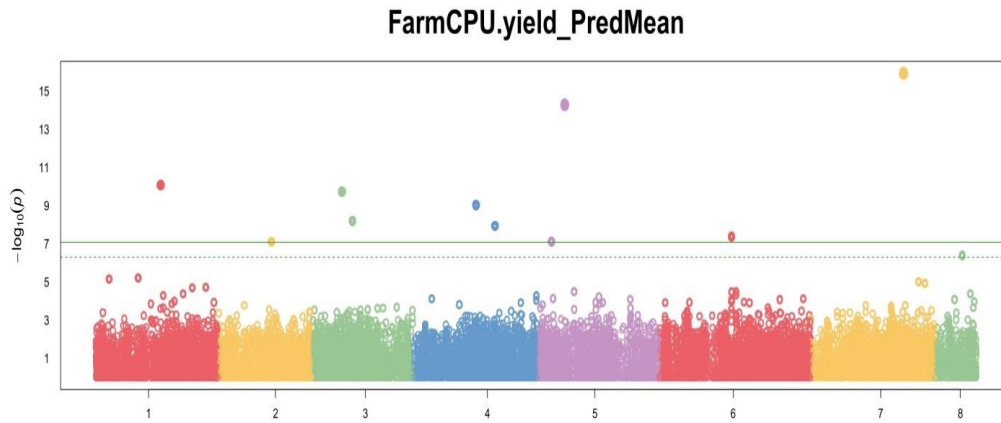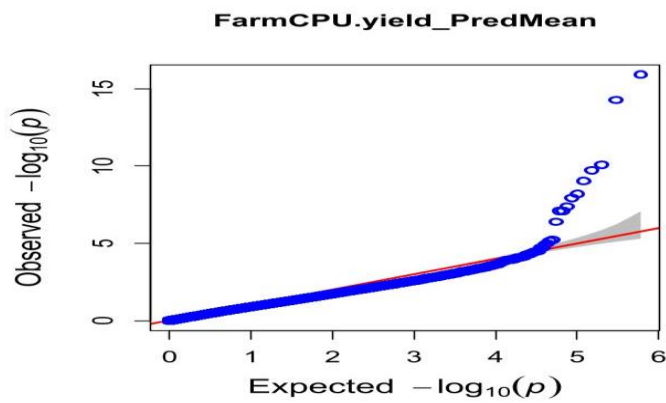

Supplementary Figure8j: Manhattan plot illustrating SNPs linked to yield with their corresponding statistical significance represented by Q-Q plot

**Supplementary Figure8: Manhattan plot illustrating SNPs linked to specific chickpea traits, along with their corresponding statistical significance represented by Q-Q plot for location 3 identified from FarmCPU model**

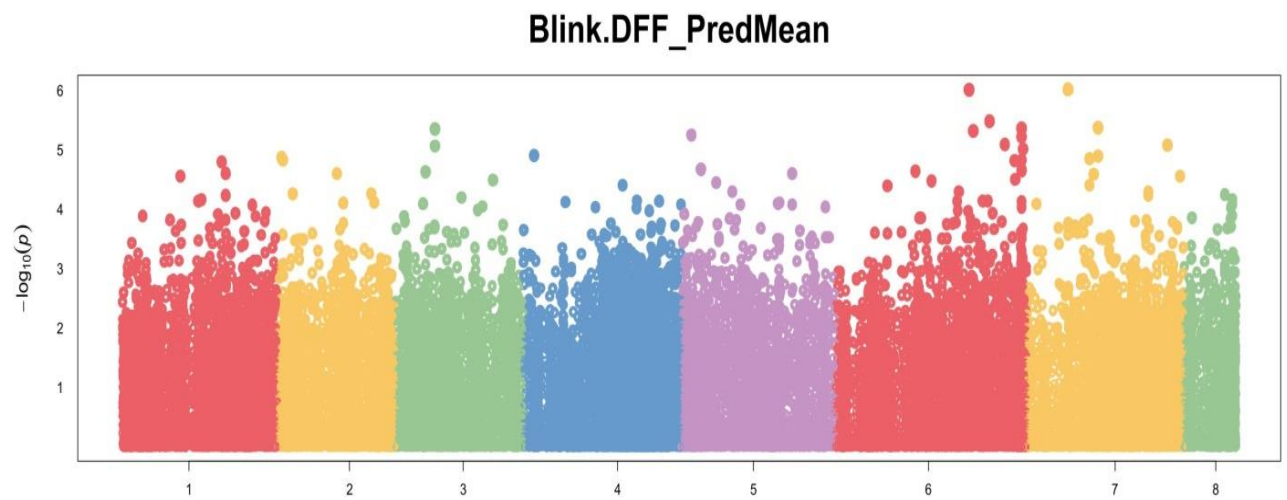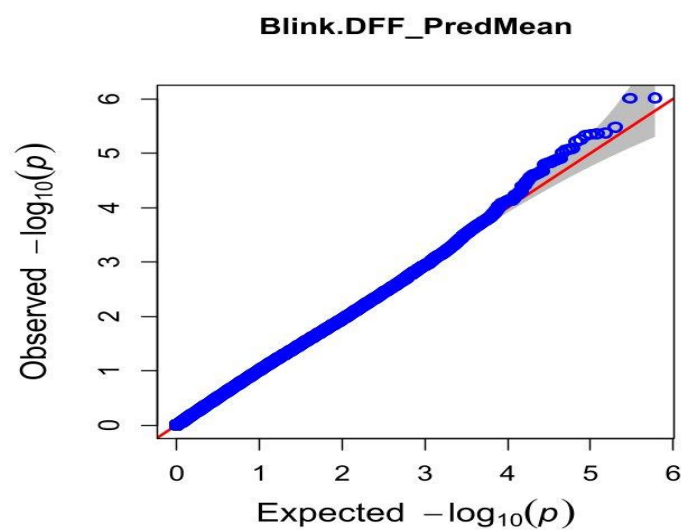

Supplementary Figure9a: Manhattan plot illustrating SNPs linked to Days fifty percentage flowering along with their corresponding statistical significance represented by Q-Q plot

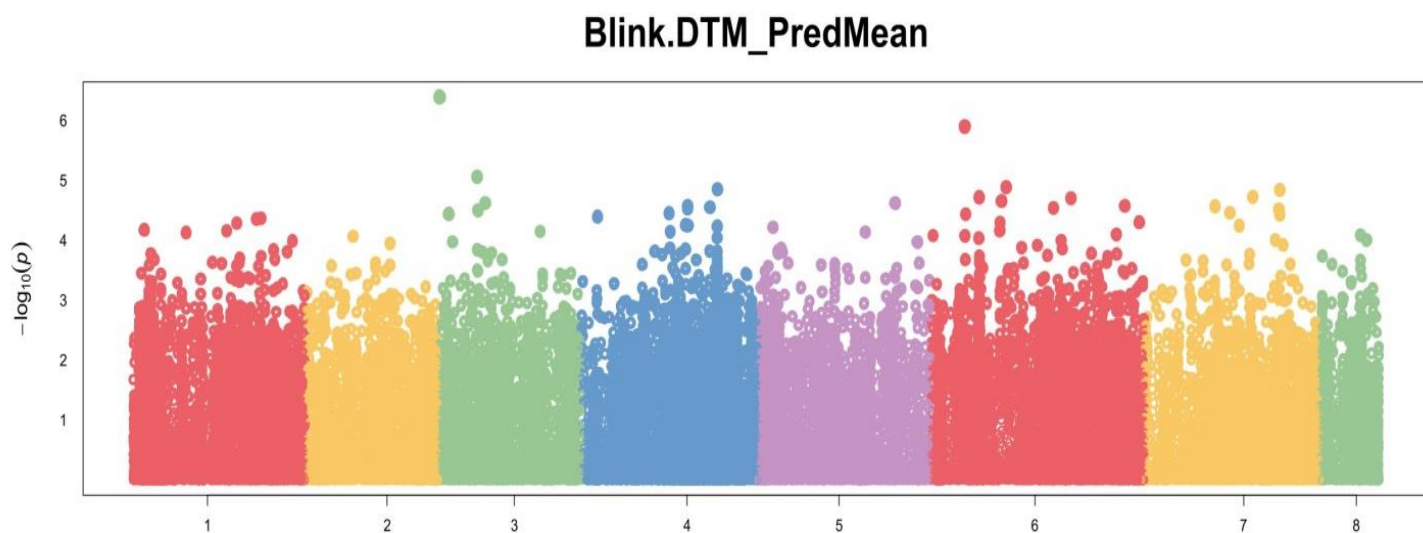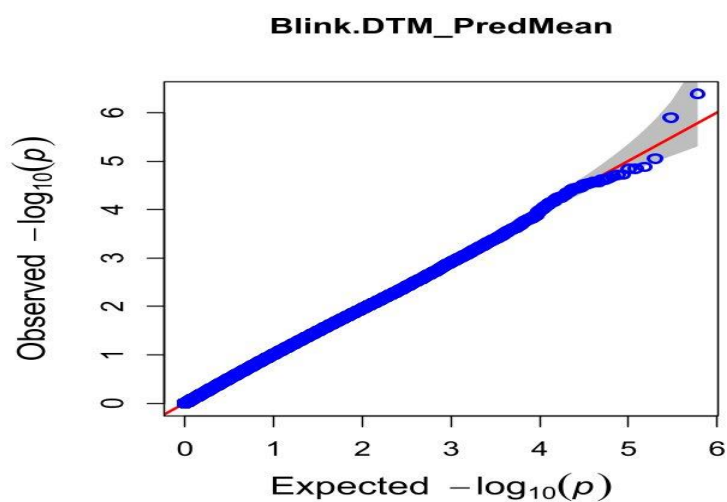

Supplementary Figure9b: Manhattan plot illustrating SNPs linked to Days to maturity along with their corresponding statistical significance represented by Q-Q plot

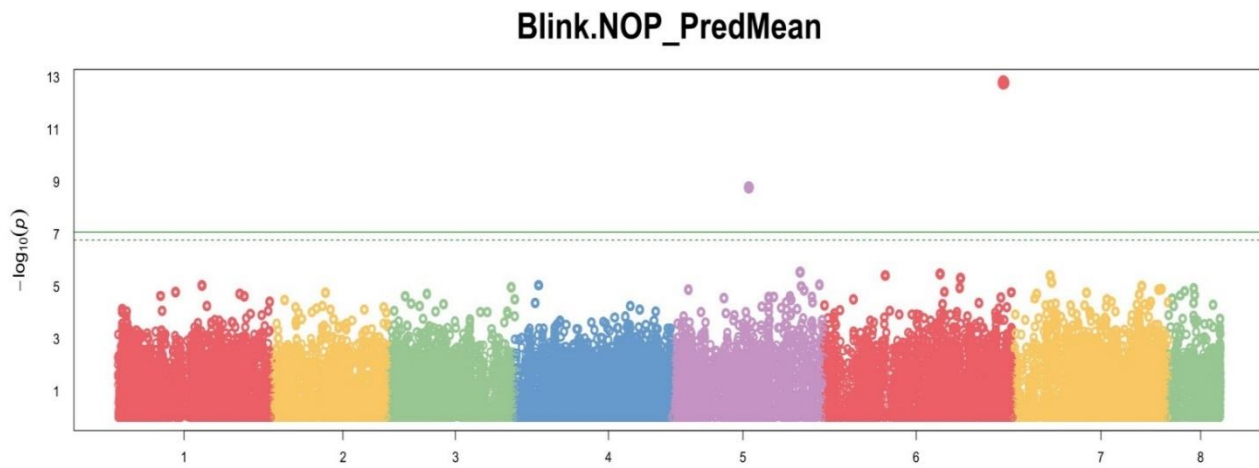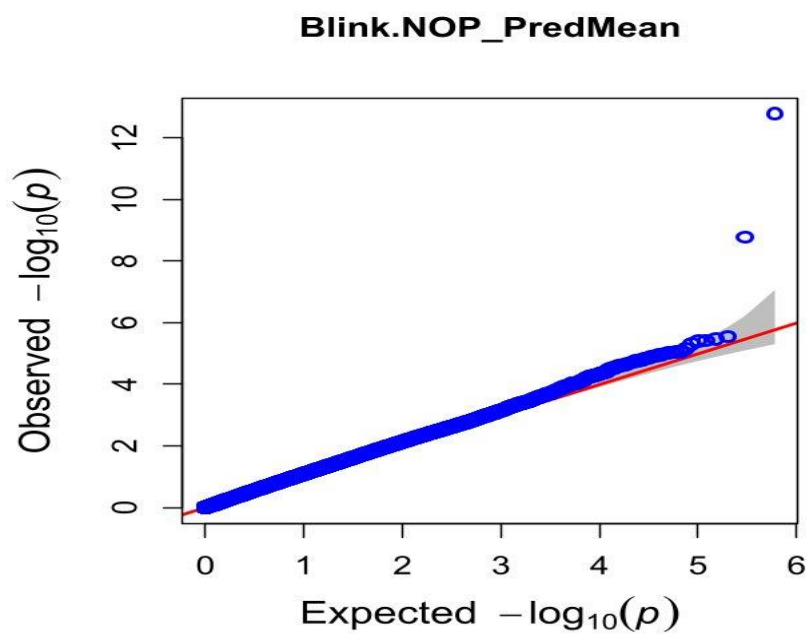

Supplementary Figure9c: Manhattan plot illustrating SNPs linked to number of pods along with their corresponding statistical significance represented by Q-Q plot

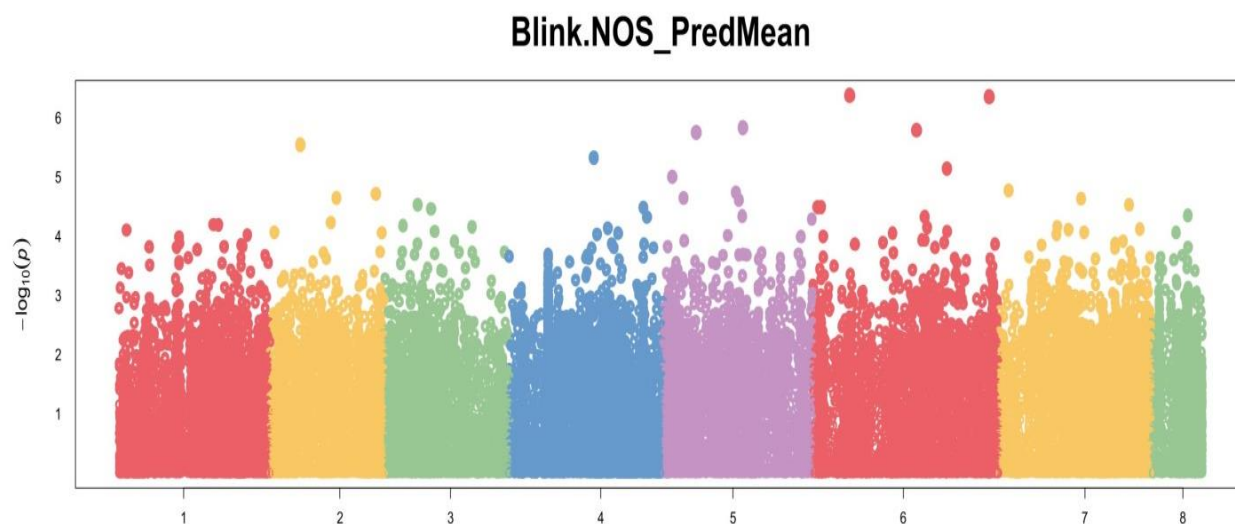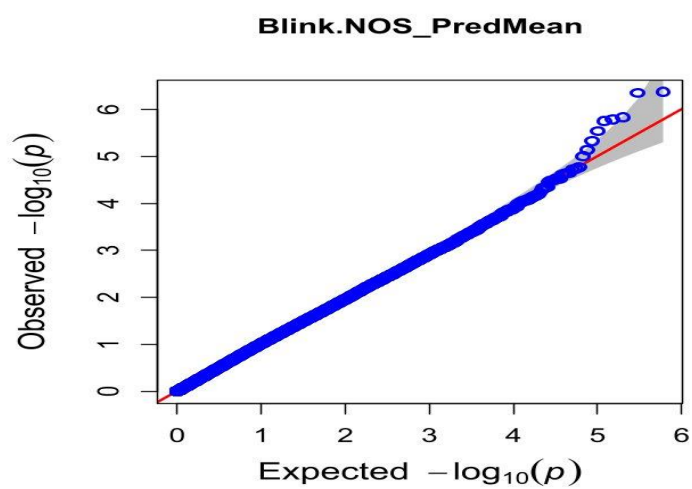

Supplementary Figure9d: Manhattan plot illustrating SNPs linked to number of seeds along with their corresponding statistical significance represented by Q-Q plot.

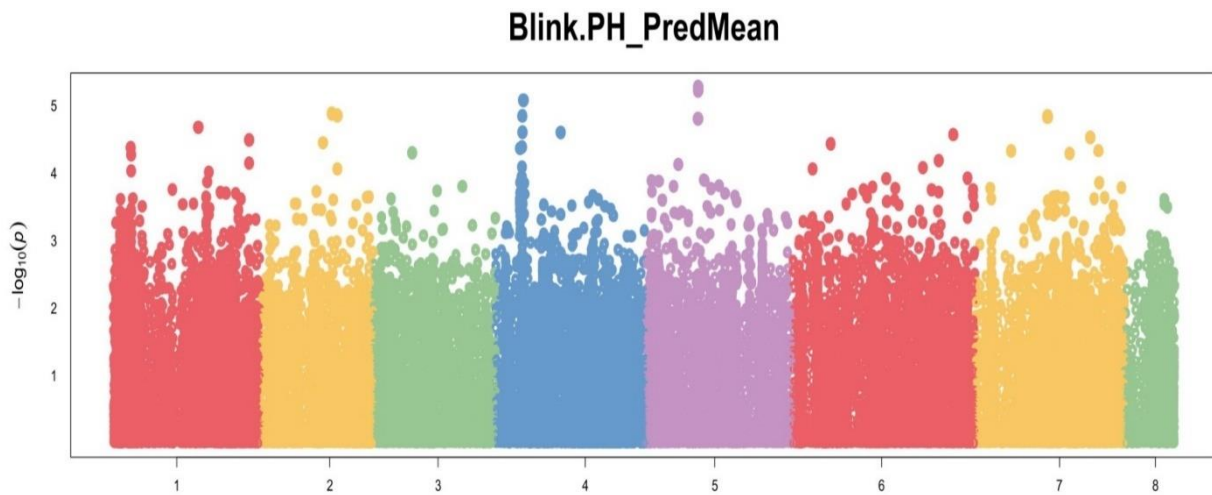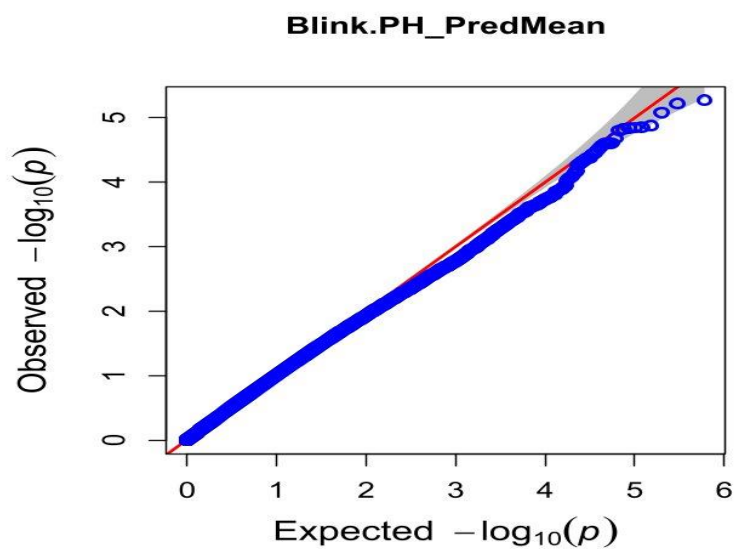

Supplementary Figure9e: Manhattan plot illustrating SNPs linked to plant height along with their corresponding statistical significance represented by Q-Q plot

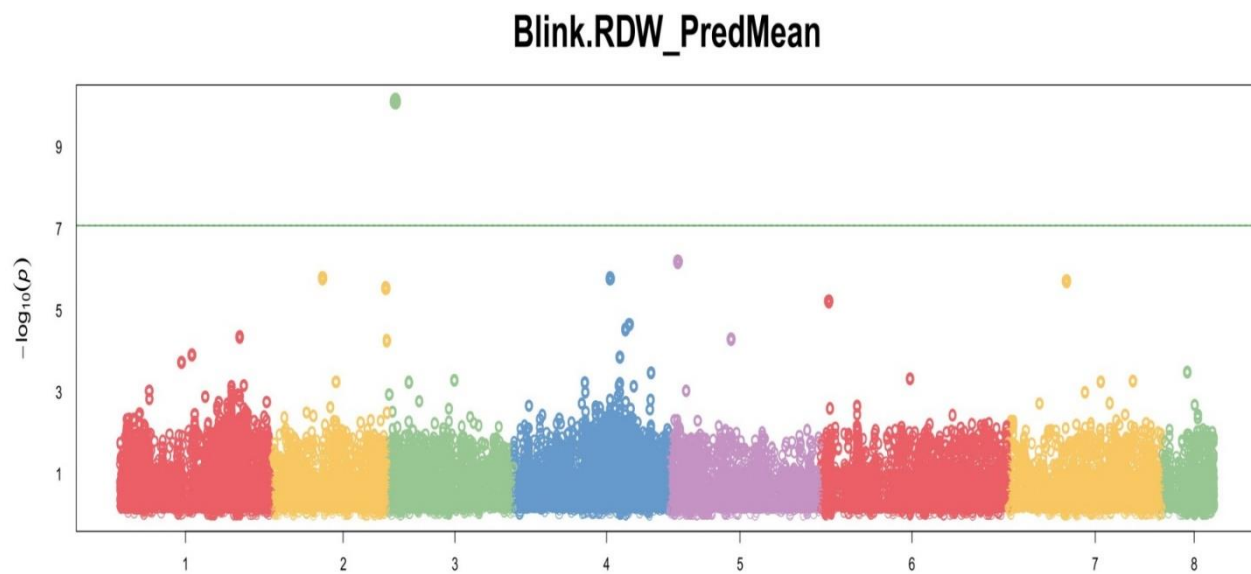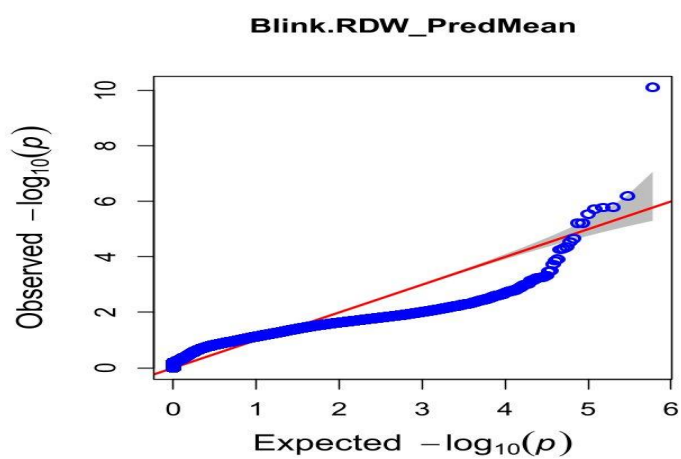

Supplementary Figure9f: Manhattan plot illustrating SNPs linked to root dry weight with their corresponding statistical significance represented by Q-Q plot

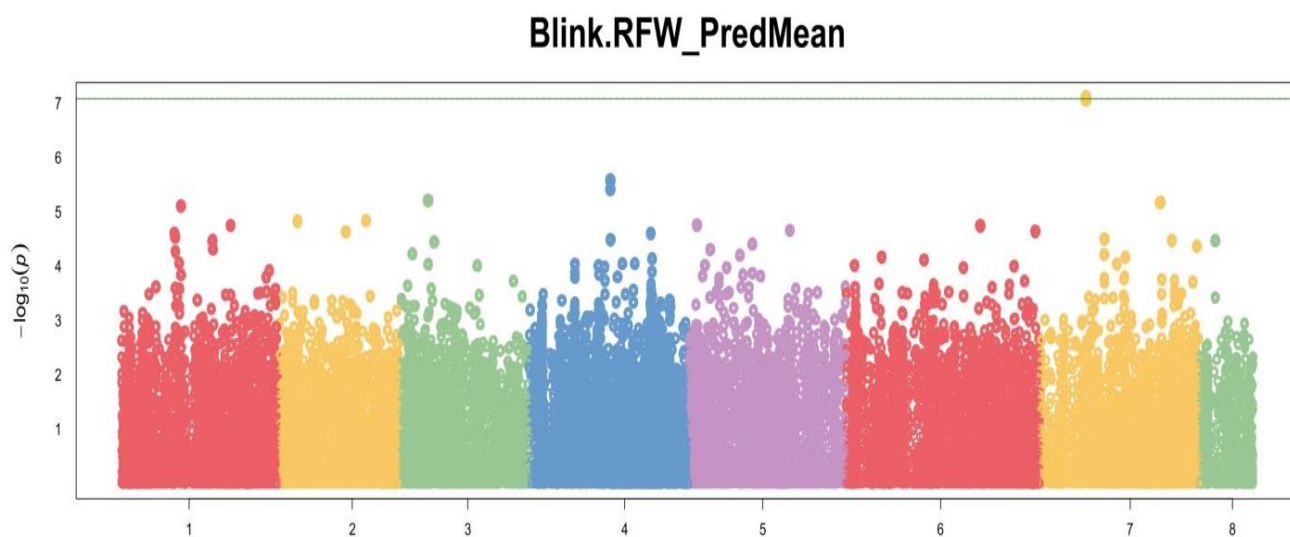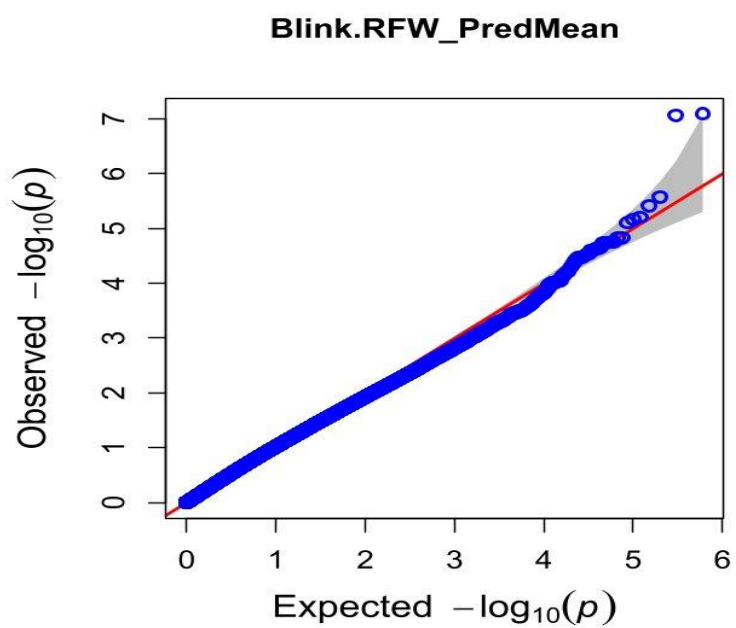

Supplementary Figure9f: Manhattan plot illustrating SNPs linked to root fresh weight with their corresponding statistical significance represented by Q-Q plot

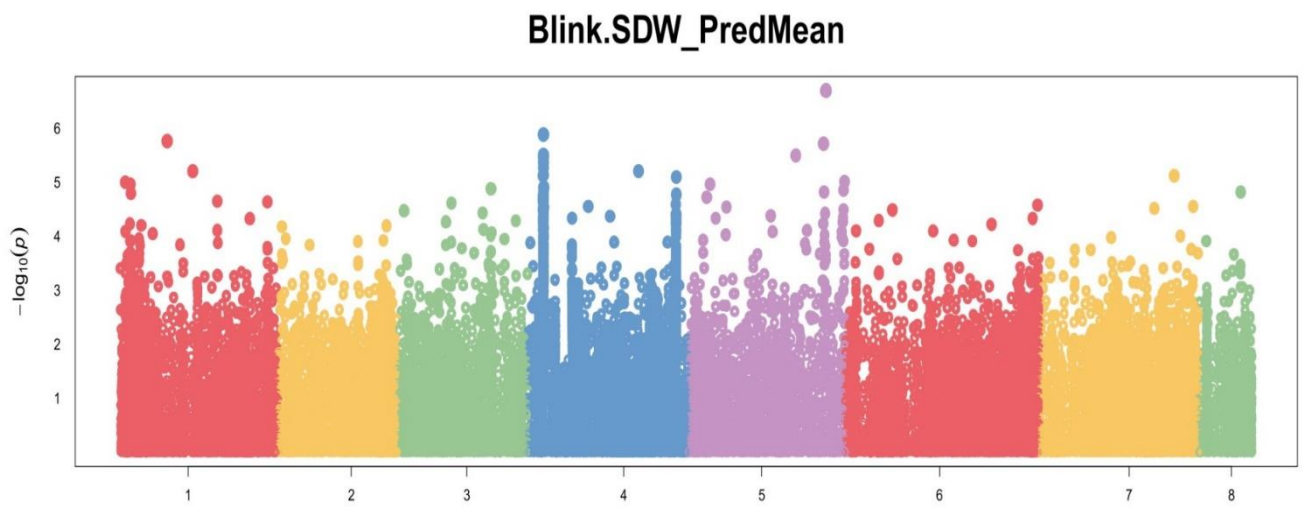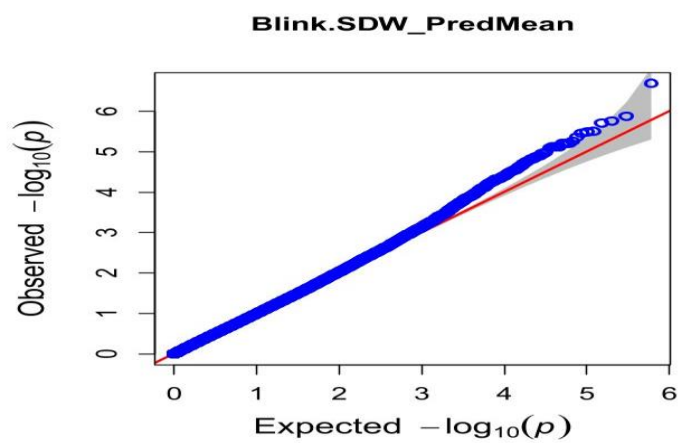

Supplementary Figure9h: Manhattan plot illustrating SNPs linked to r shoot dry weight with their corresponding statistical significance represented by Q-Q plot

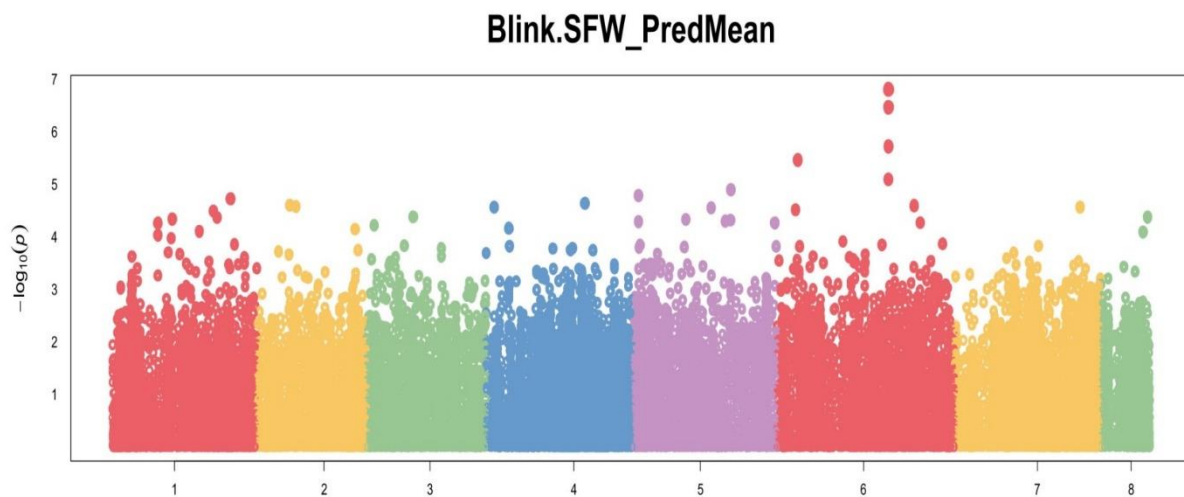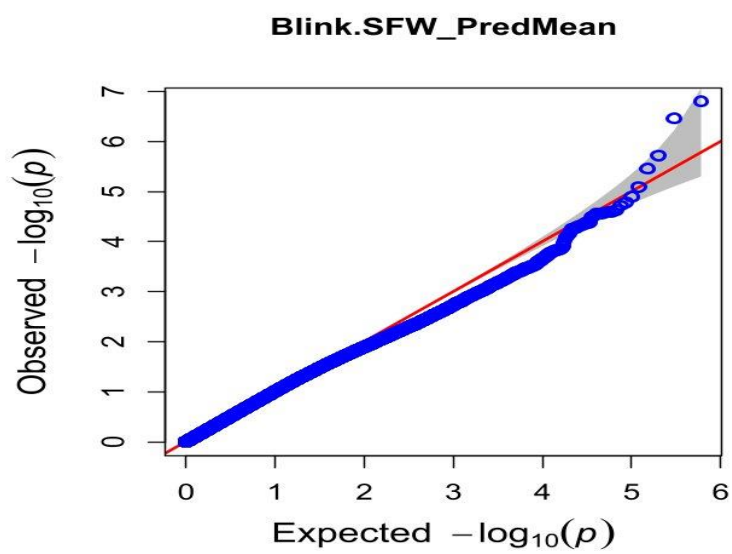

Supplementary Figure9i: Manhattan plot illustrating SNPs linked to shoot fresh weight with their corresponding statistical significance represented by Q-Q plot

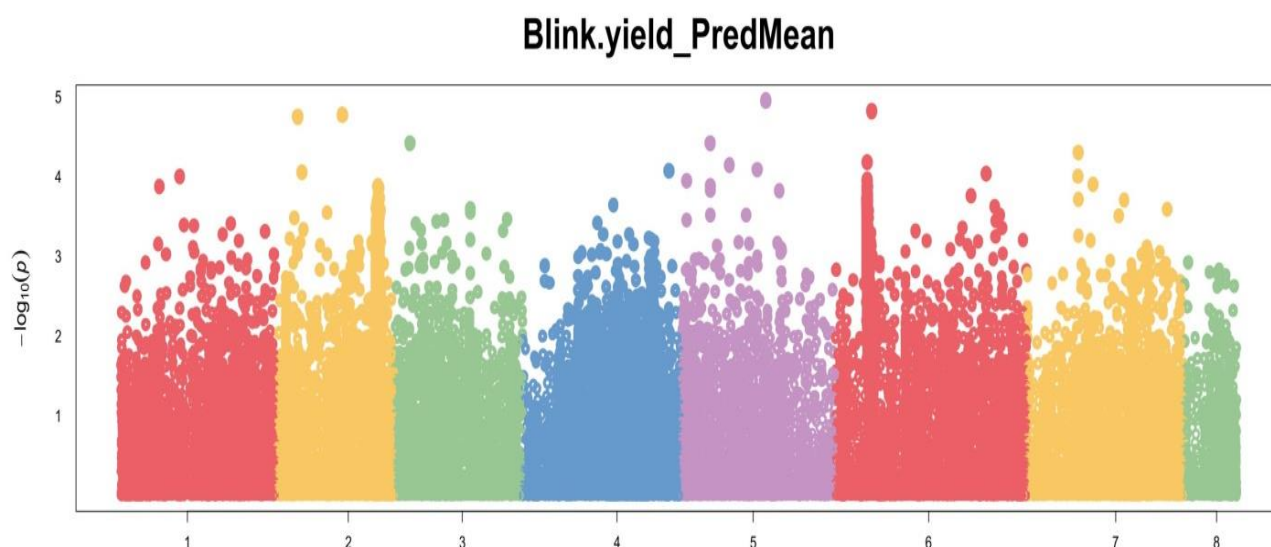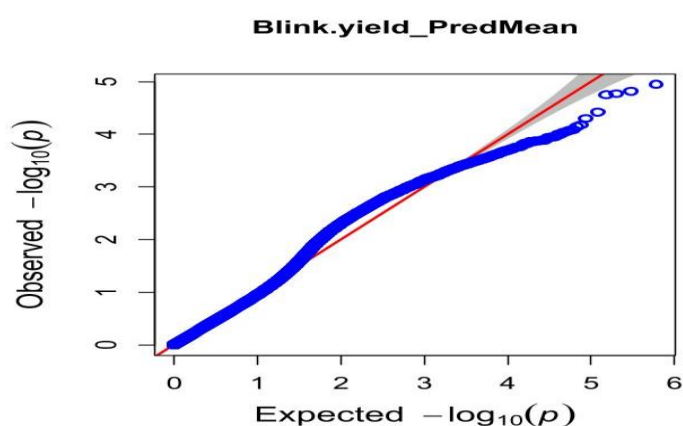

Supplementary Figure9j: Manhattan plot illustrating SNPs linked to yield with their corresponding statistical significance represented by Q-Q plot

**Supplementary Figure9: Manhattan plot illustrating SNPs linked to specific chickpea traits, along with their corresponding statistical significance represented by Q-Q plot for location 4 identified from Blink model**

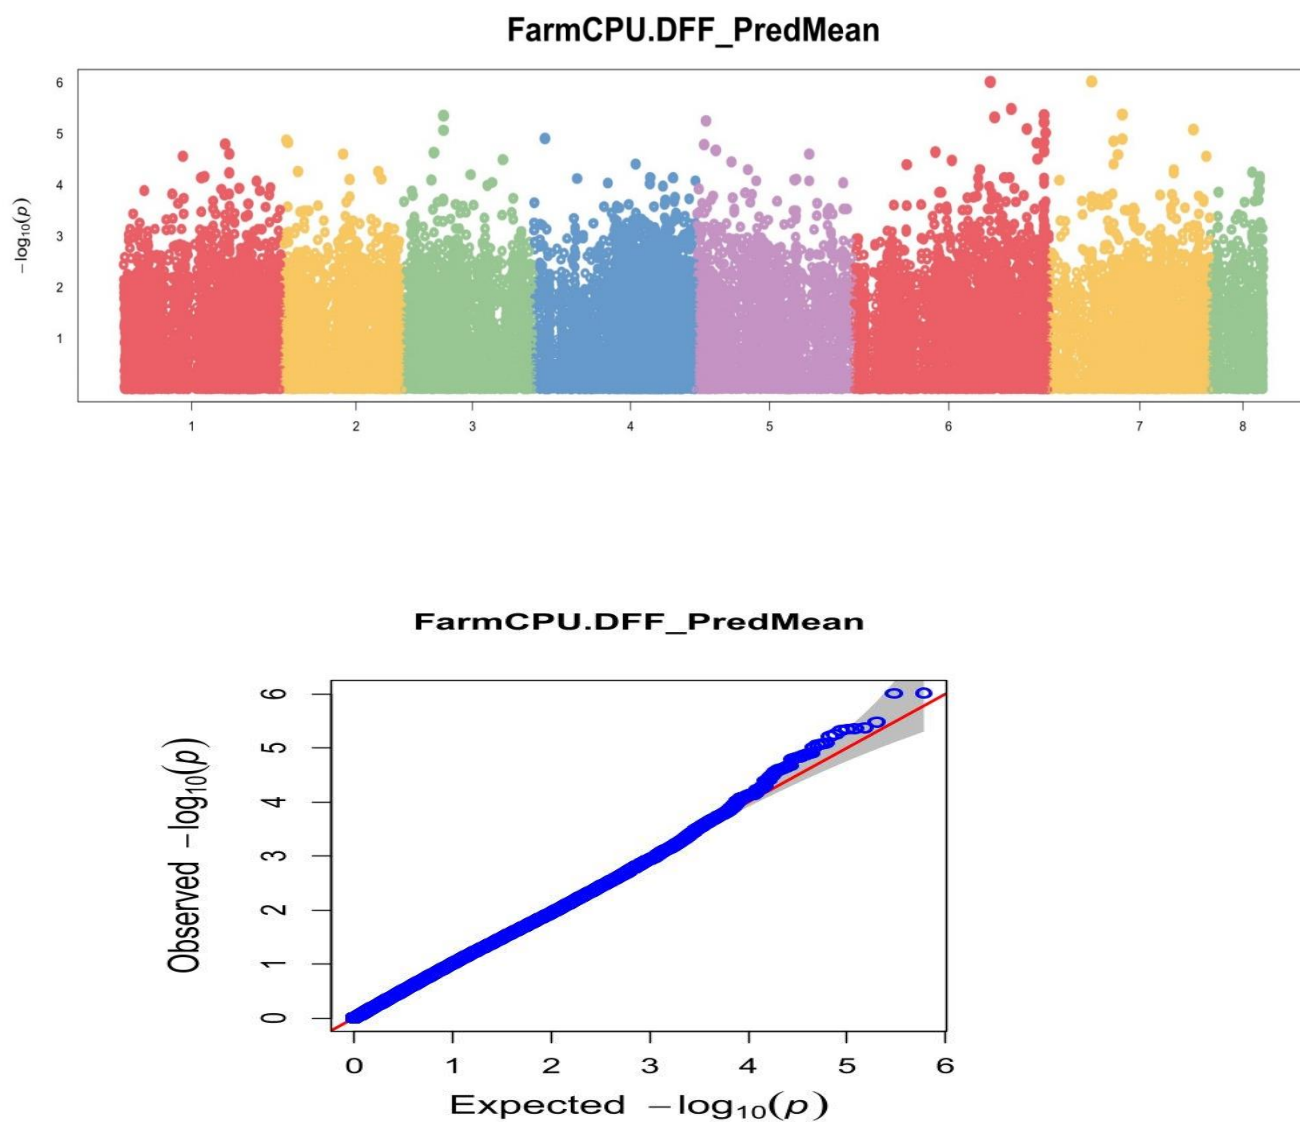

Supplementary Figure10a: Manhattan plot illustrating SNPs linked to Days fifty percentage flowering along with their corresponding statistical significance represented by Q-Q plot.

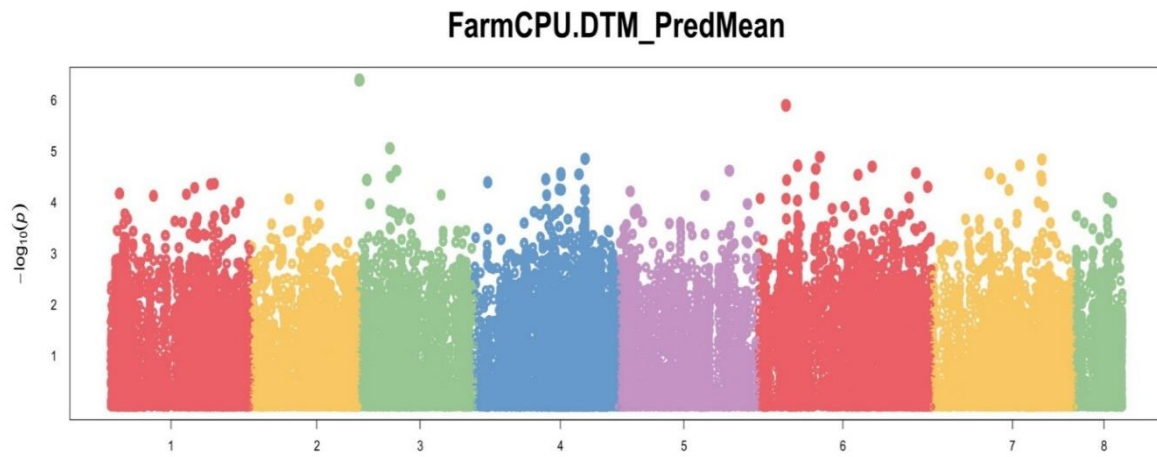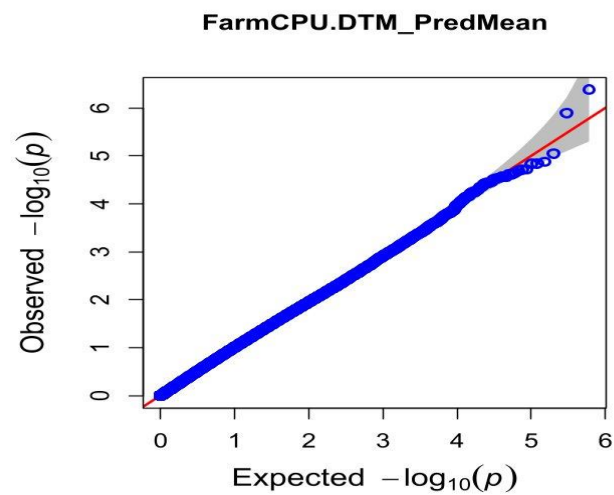

Supplementary Figure10b: Manhattan plot illustrating SNPs linked to Days to maturity along with their corresponding statistical significance represented by Q-Q plot

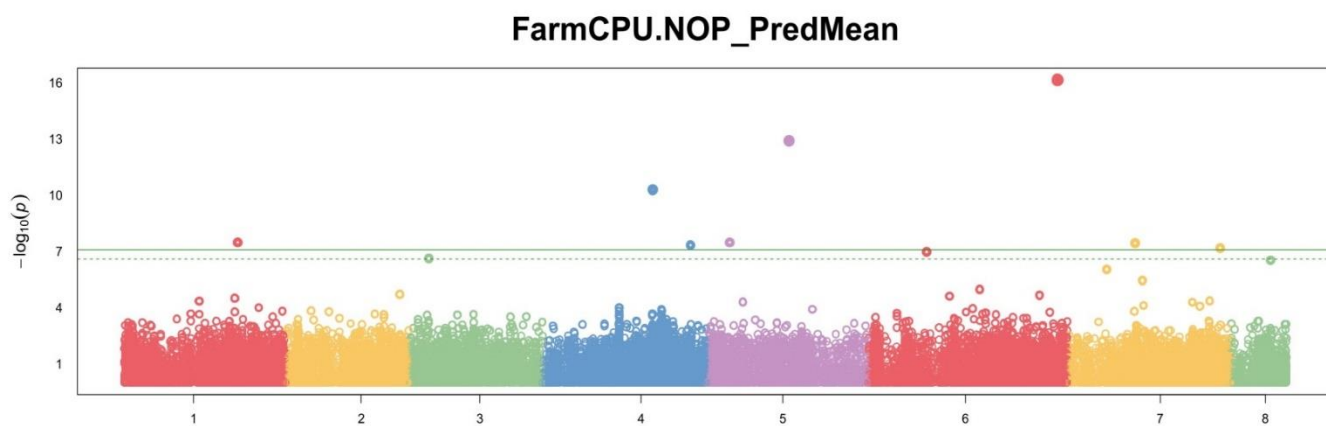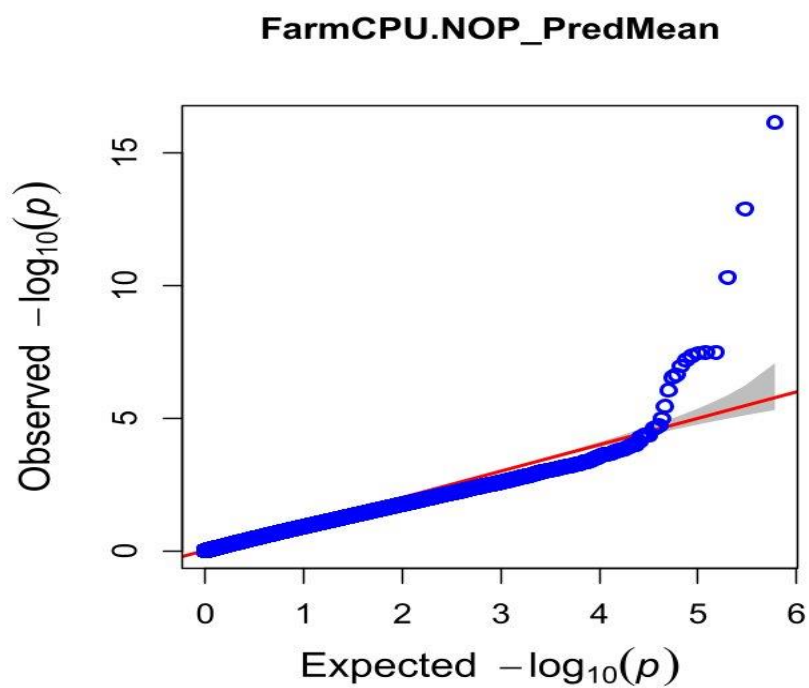

Supplementary Figure10b: Manhattan plot illustrating SNPs linked to number of along with their corresponding statistical significance represented by Q-Q plot

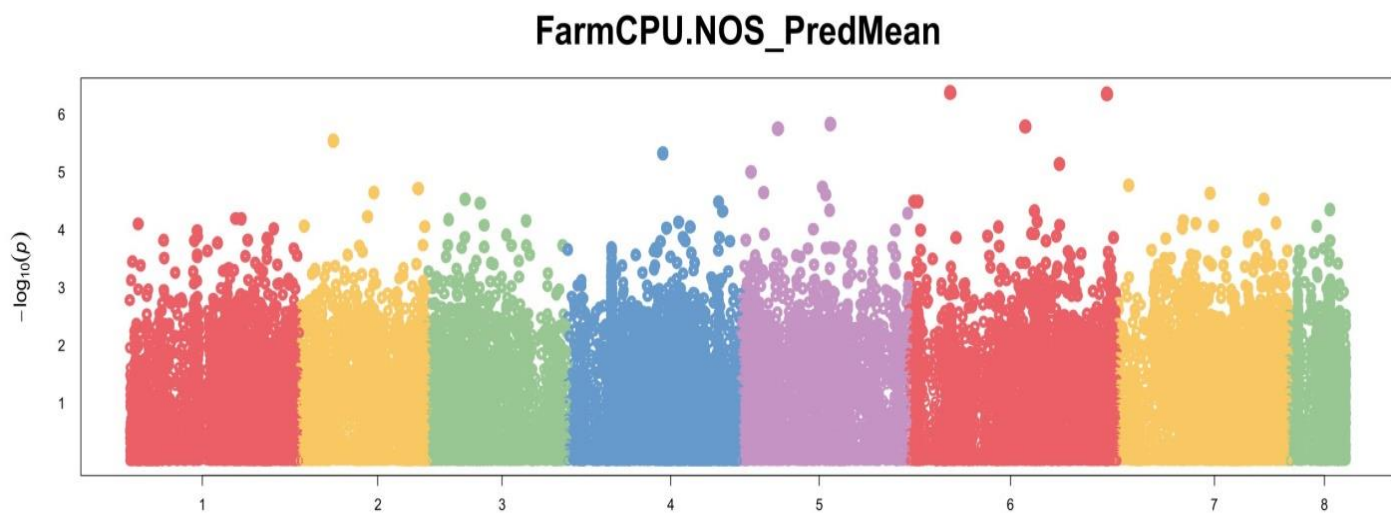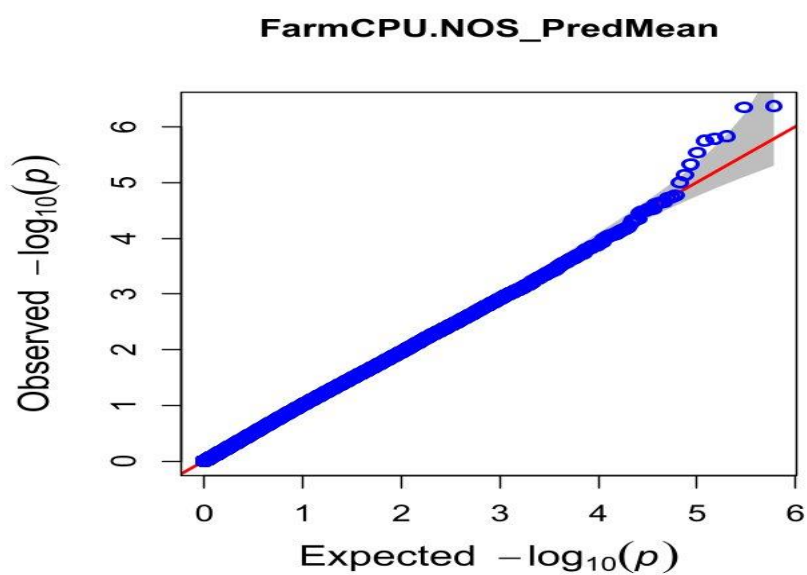

Supplementary Figure10d: Manhattan plot illustrating SNPs linked to number of seeds along with their corresponding statistical significance represented by Q-Q plot

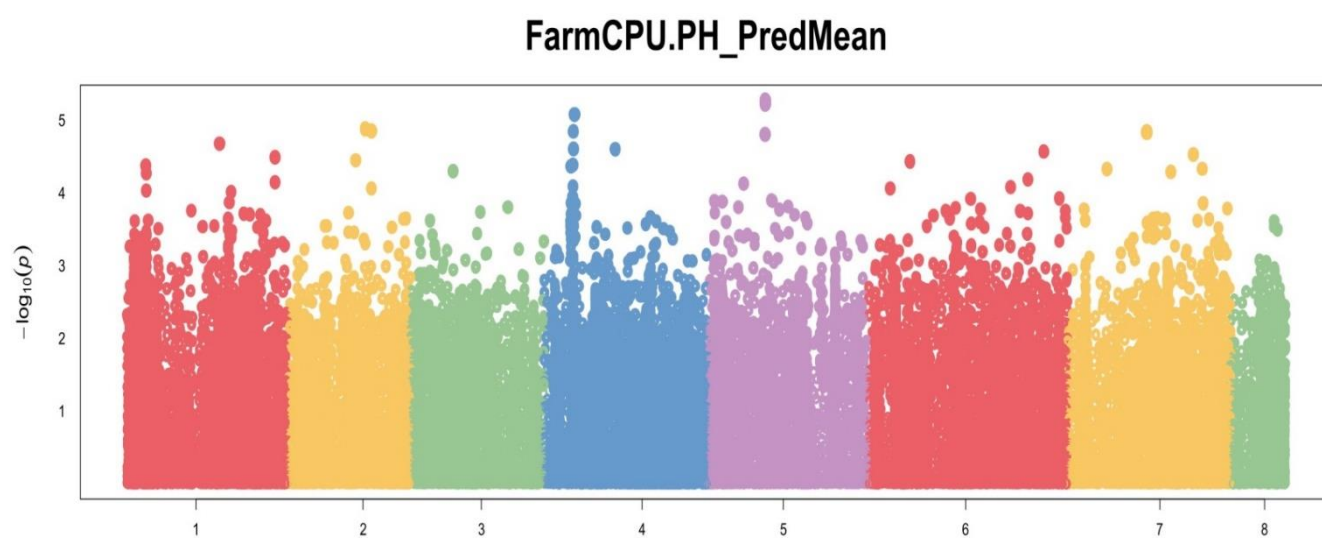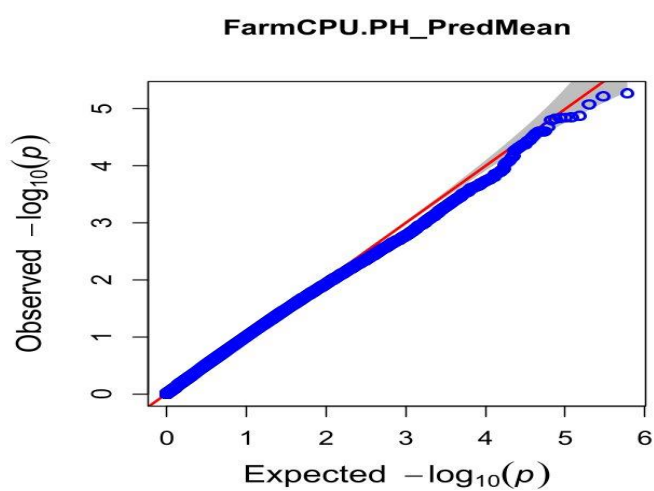

Supplementary Figure10e: Manhattan plot illustrating SNPs linked to plant height along with their corresponding statistical significance represented by Q-Q plot

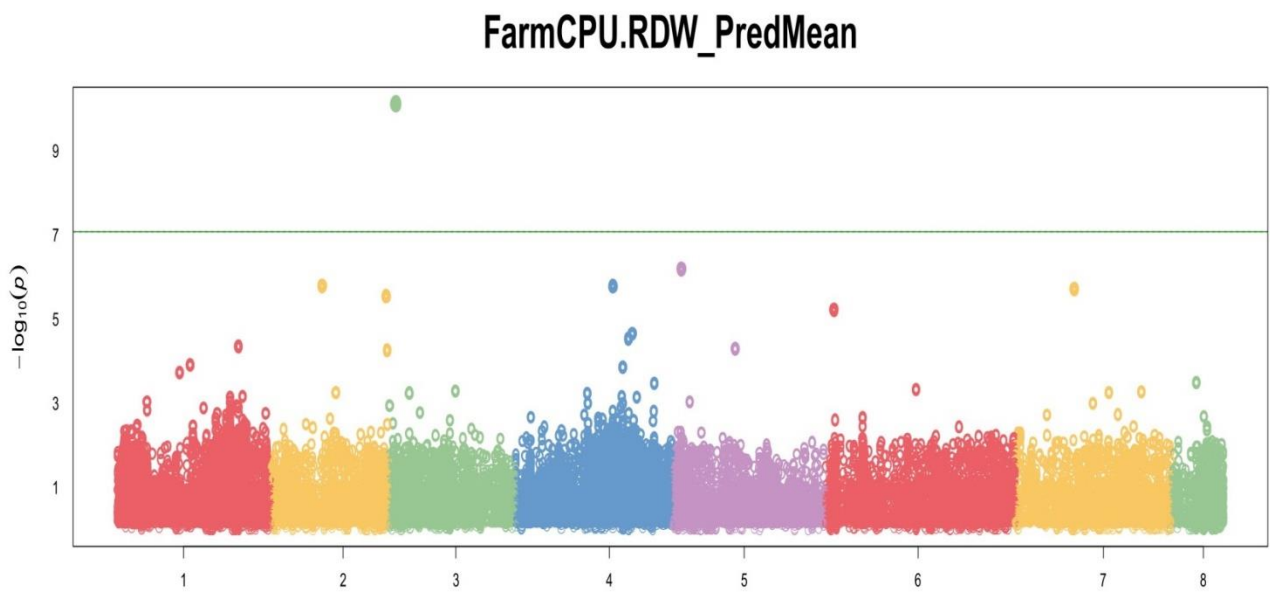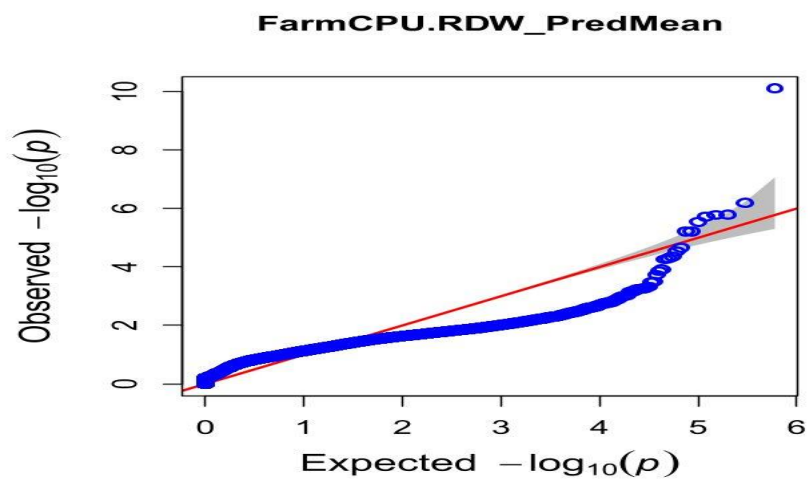

Supplementary Figure10f: Manhattan plot illustrating SNPs linked to root dry weight with their corresponding statistical significance represented by Q-Q plot

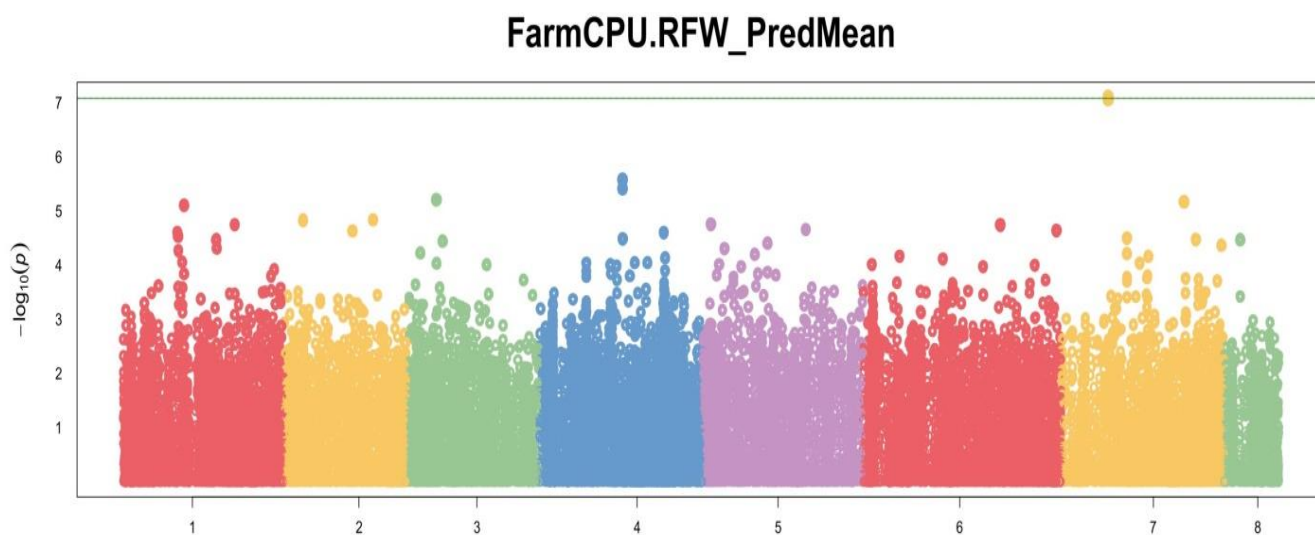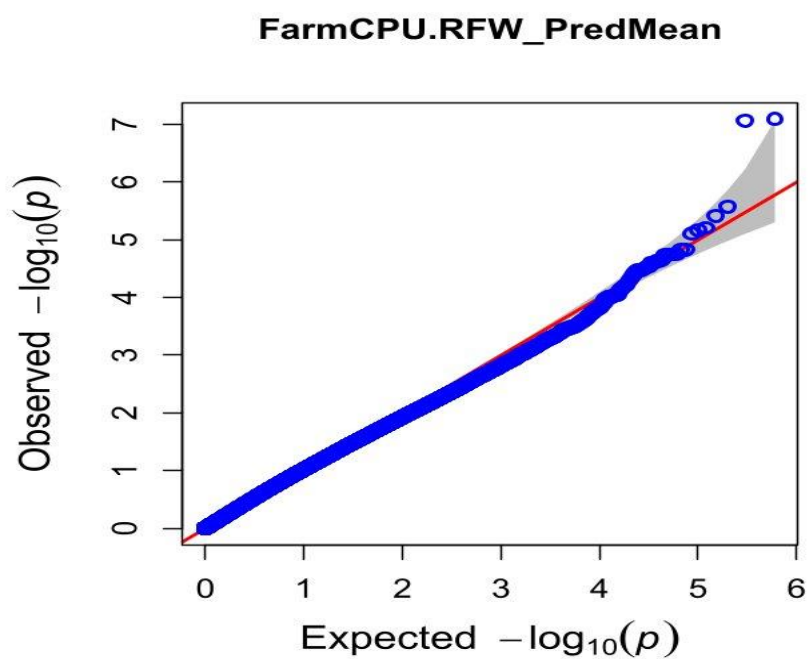

Supplementary Figure10g: Manhattan plot illustrating SNPs linked to root fresh weight with their corresponding statistical significance represented by Q-Q plot

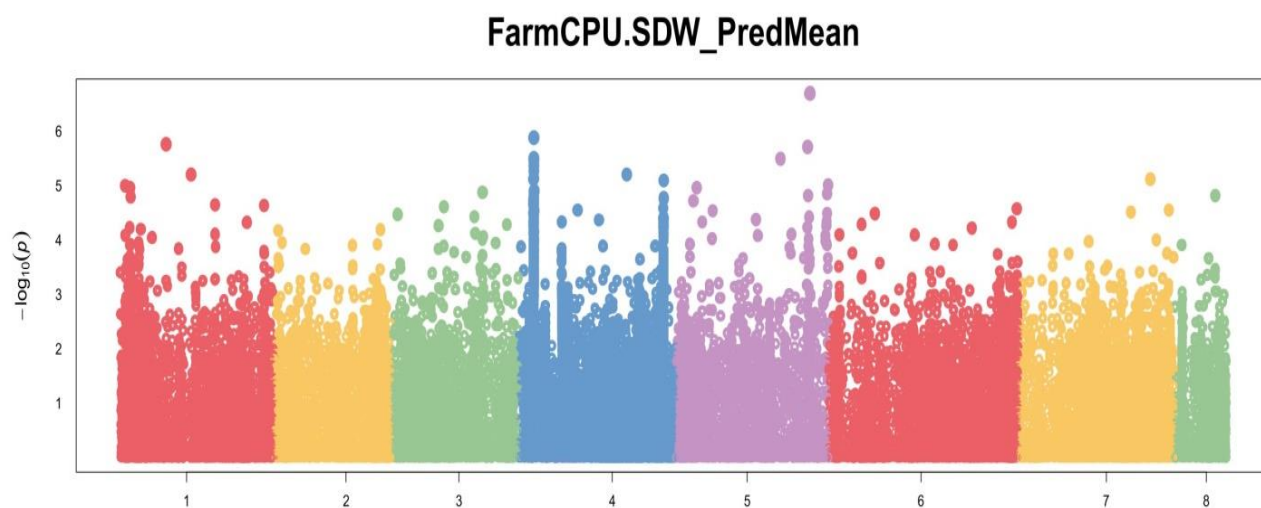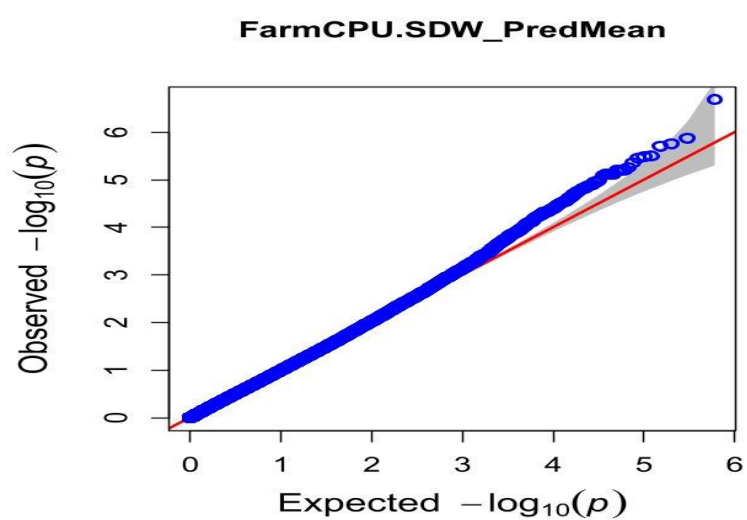

Supplementary Figure10h: Manhattan plot illustrating SNPs linked to shoot dry weight with their corresponding statistical significance represented by Q-Q plot

FarmCPU.SFW\_PredMean

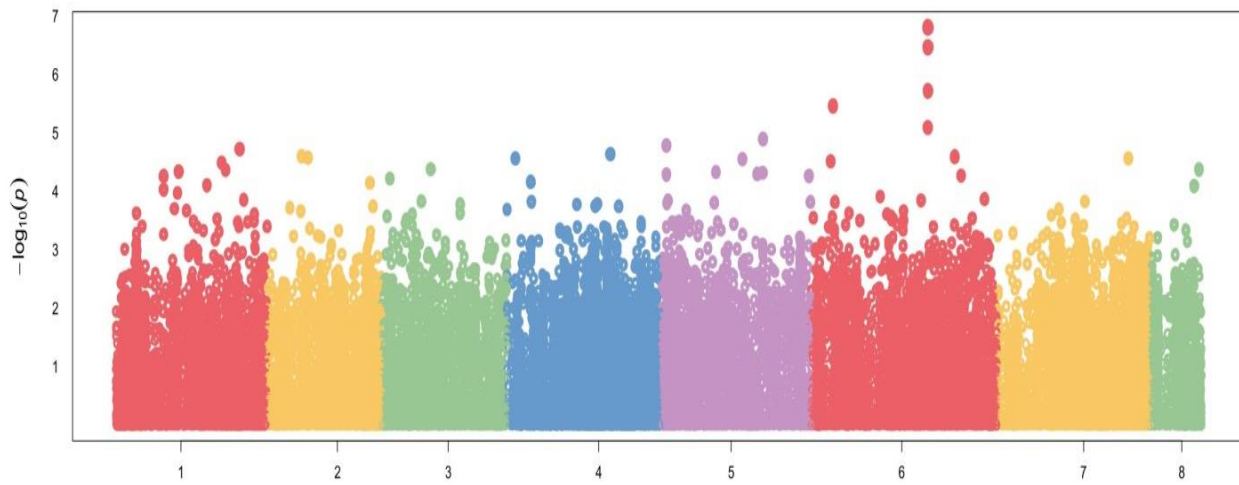

FarmCPU.SFW\_PredMean

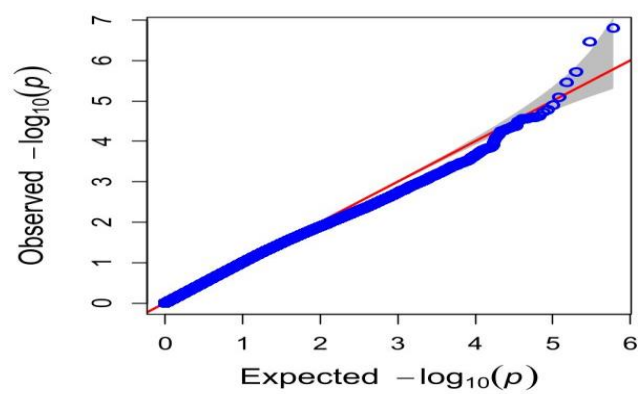

Supplementary Figure10i: Manhattan plot illustrating SNPs linked to shoot fresh weight with their corresponding statistical significance represented by Q-Q plot

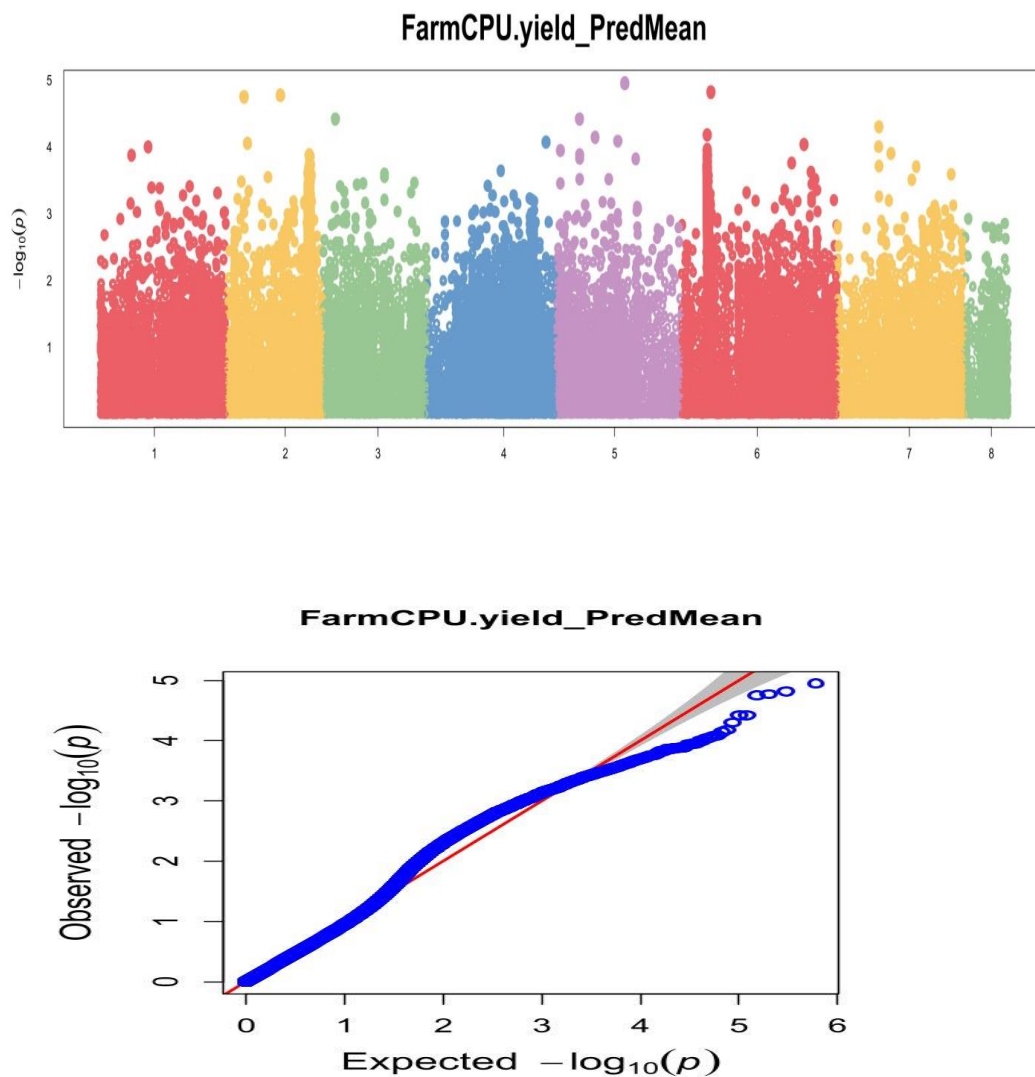

Supplementary Figure10j: Manhattan plot illustrating SNPs linked to yield with their corresponding statistical significance represented by Q-Q plot

**Supplementary Figure10:** Manhattan plot illustrating SNPs linked to specific chickpea traits, along with their corresponding statistical significance represented by Q-Q plot for location 4 identified from FarmCPU model
