# Supplementary material for: Genome-wide association mapping identifies novel SNPs for root nodulation and agronomic traits in chickpea
Source: Frontiers journal article supplement (doi:10.3389/fpls.2024.1395938), 2024-10-15
Supplement: Data_Sheet_1.zip [file Data_Sheet_1.zip]

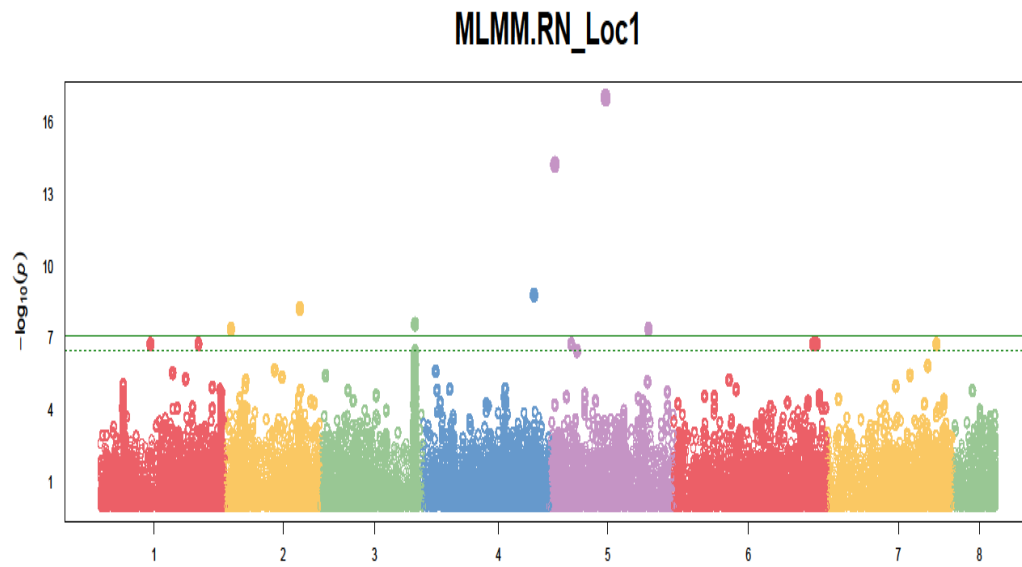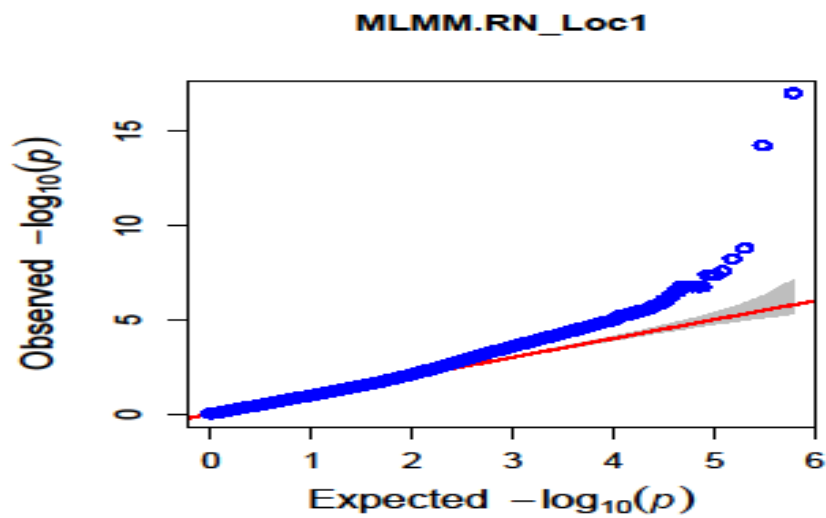

Supplementary figure1a: Manhattan plot illustrating SNPs linked to number of nodule along with their corresponding statistical significance represented by Q-Q plot for location 1-FarmCPU model

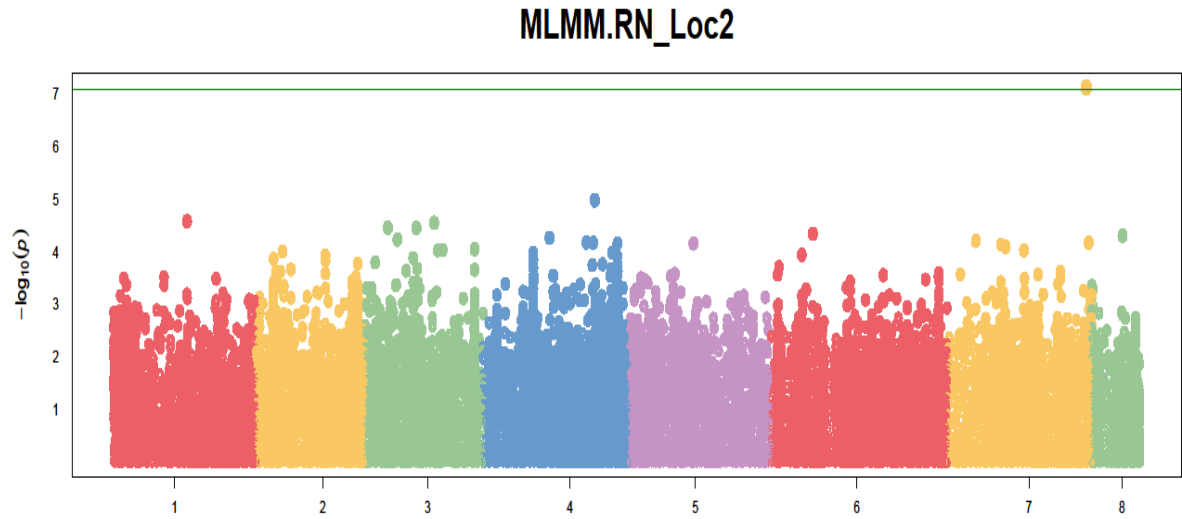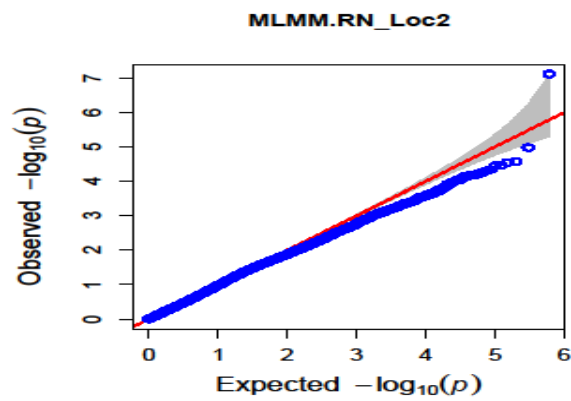

Supplementary figure1b: Manhattan plot illustrating SNPs linked to number of nodule along with their corresponding statistical significance represented by Q-Q plot for location 2-FarmCPU model

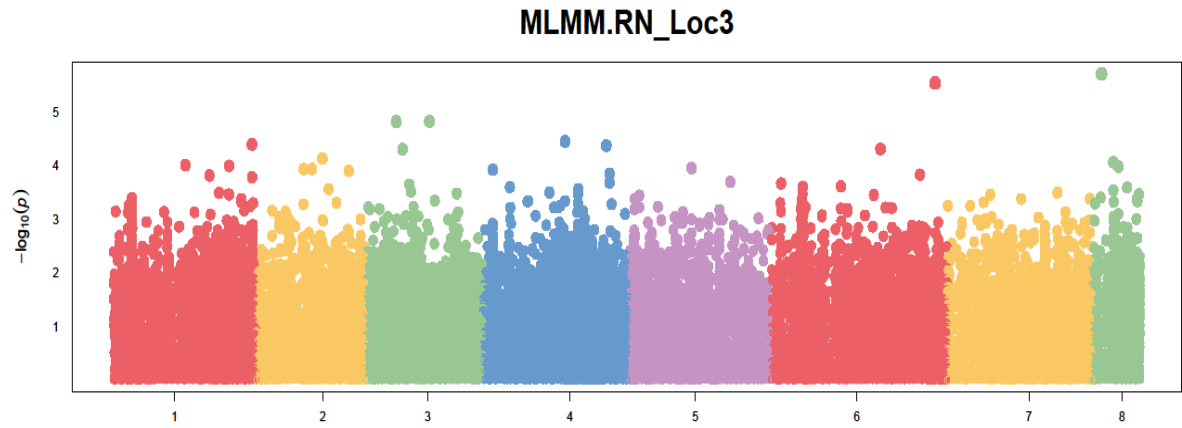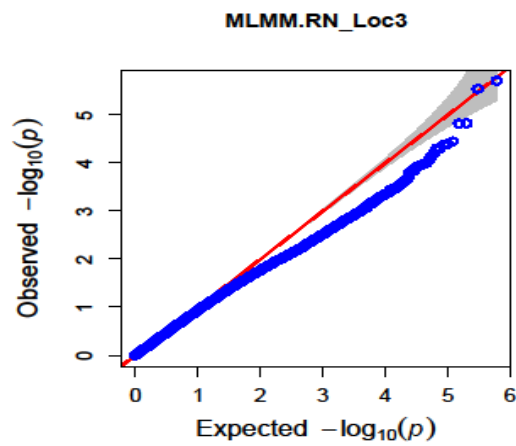

Supplementary figure1c: Manhattan plot illustrating SNPs linked to number of nodule along with their corresponding statistical significance represented by Q-Q plot for location 3-FarmCPU model

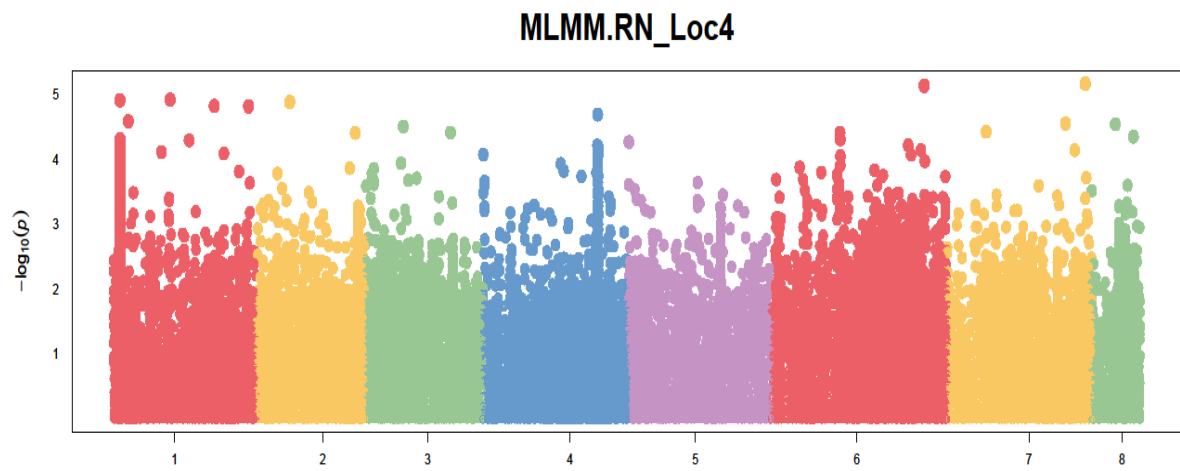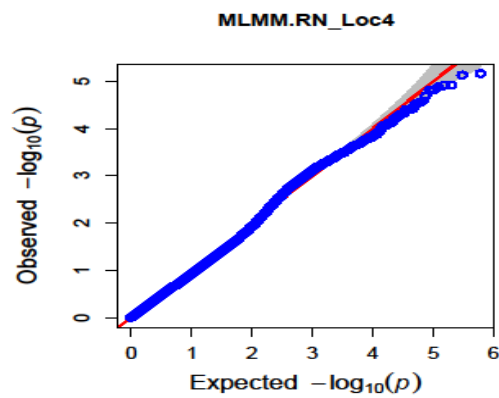

Supplementary figure1c: Manhattan plot illustrating SNPs linked to number of nodule along with their corresponding statistical significance represented by Q-Q plot for location 4-FarmCPU model

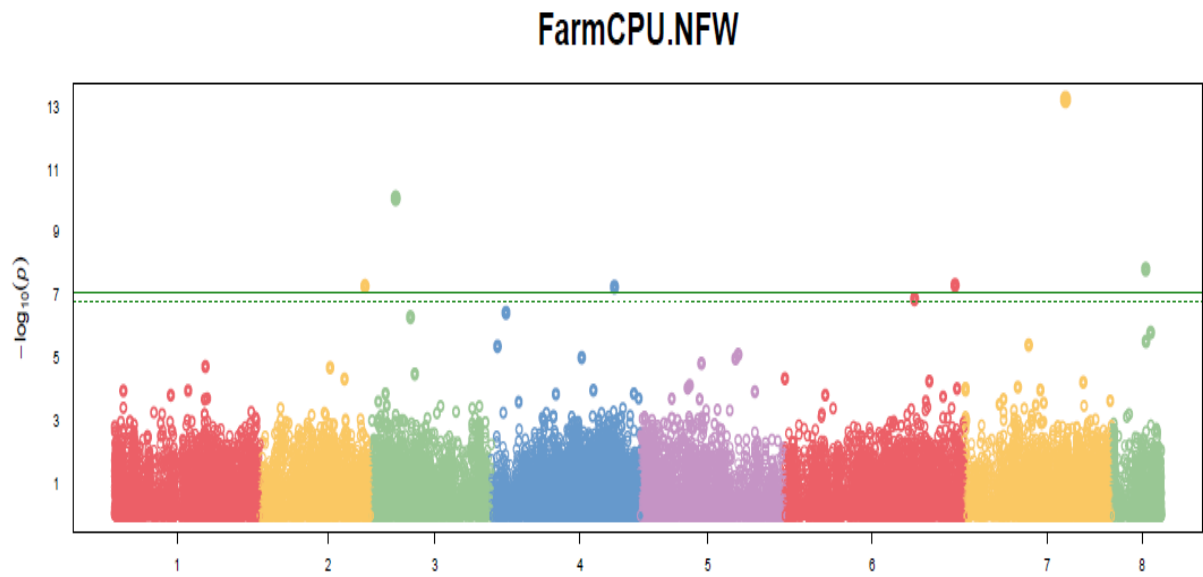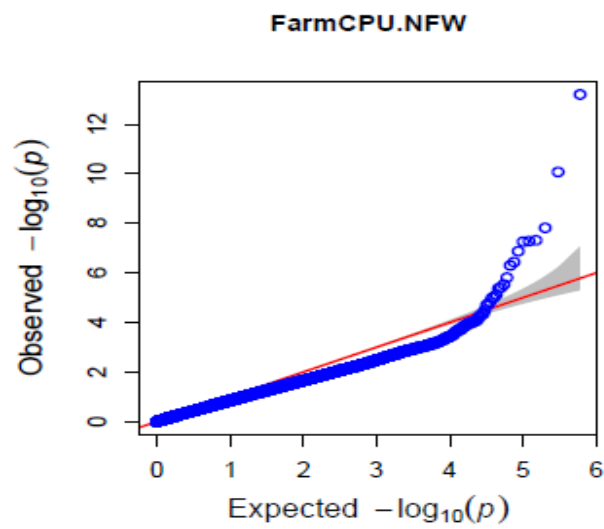

Supplementary figure2a: Manhattan plot illustrating SNPs linked to nodule fresh weight along with their corresponding statistical significance represented by Q-Q plot for location 1-FarmCPU model.

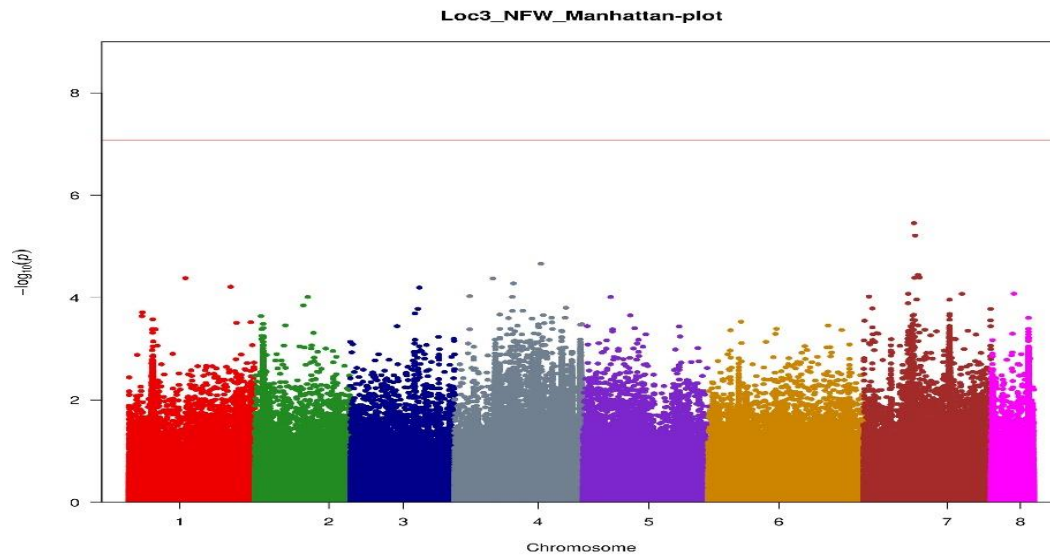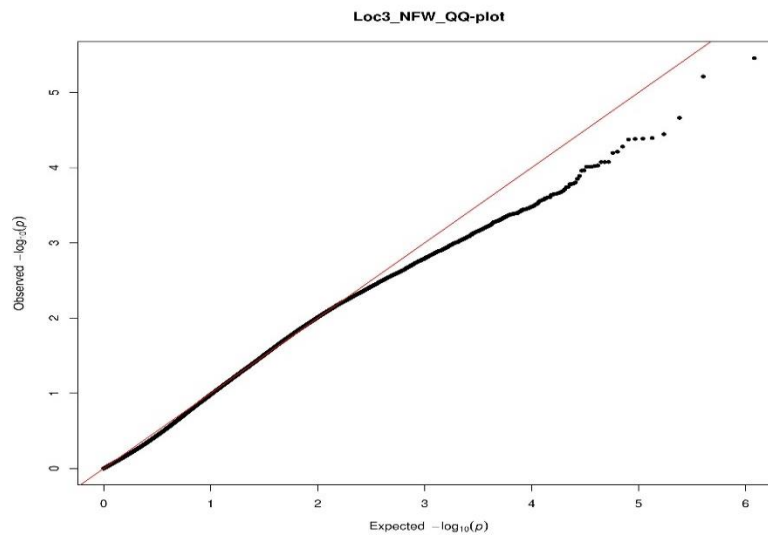

Supplementary figure2b: Manhattan plot illustrating SNPs linked to nodule fresh weight along with their corresponding statistical significance represented by Q-Q plot for location 3-FarmCPU model

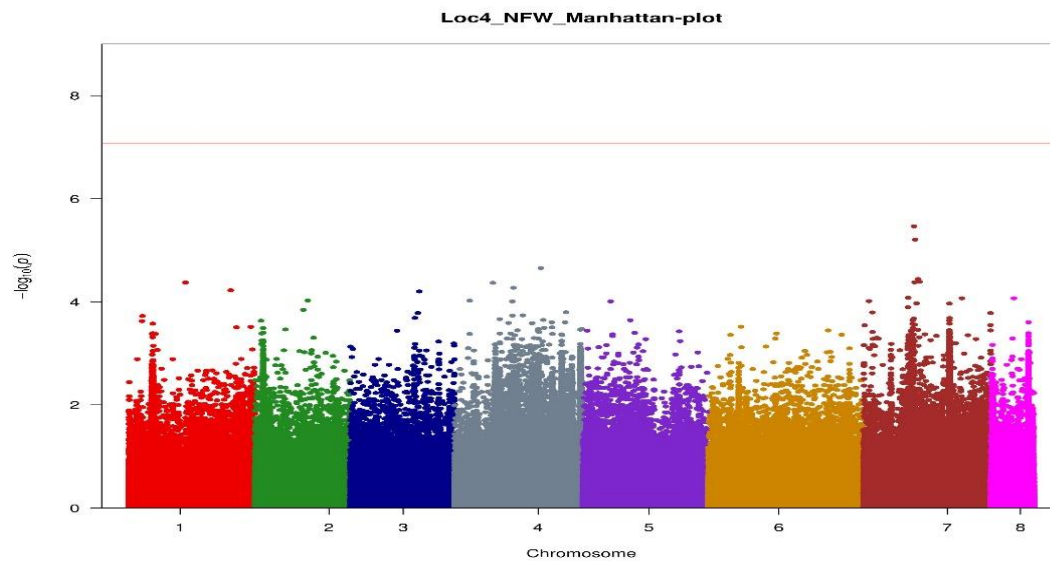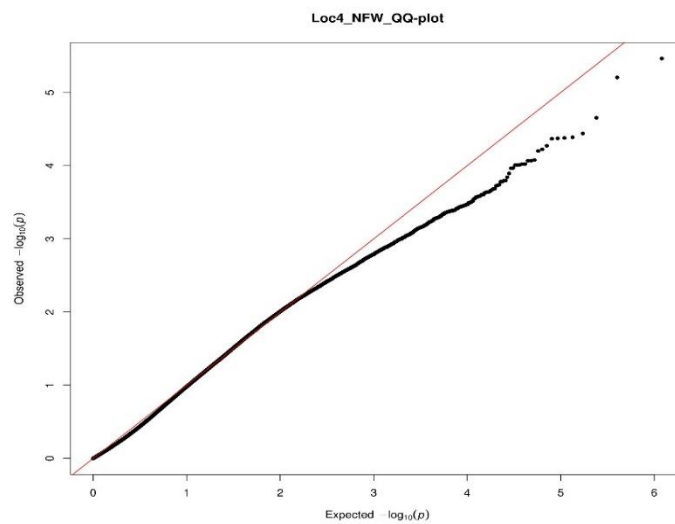

Supplementary figure2c: Manhattan plot illustrating SNPs linked to nodule fresh weight along with their corresponding statistical significance represented by Q-Q plot for location 4-FarmCPU model

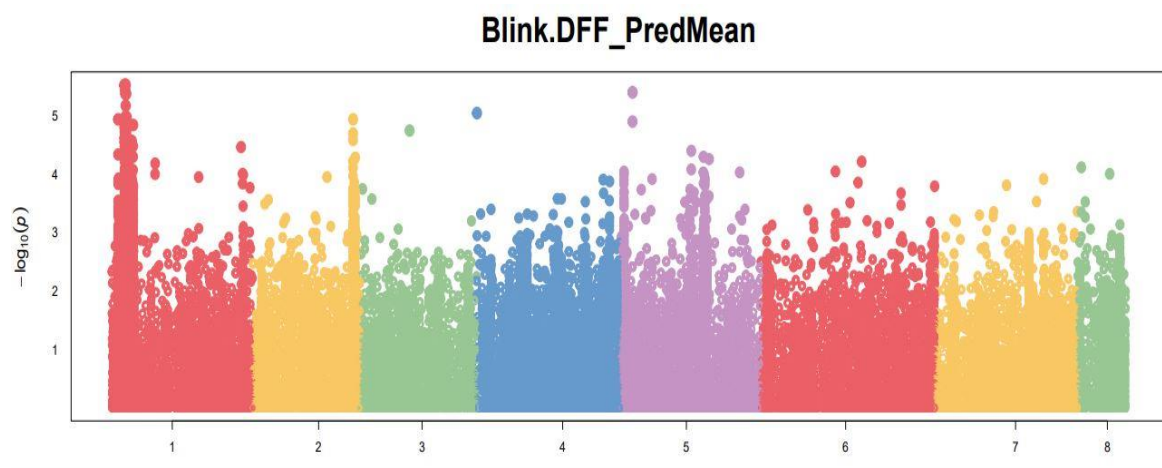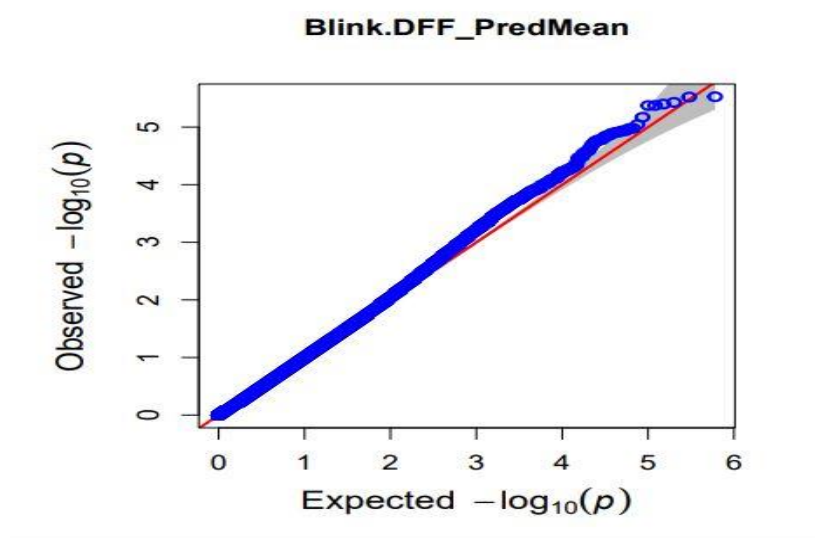

Supplementary Figure3a: Manhattan plot illustrating SNPs linked to Days fifty percentage flowering along with their corresponding statistical significance represented by Q-Q plot .

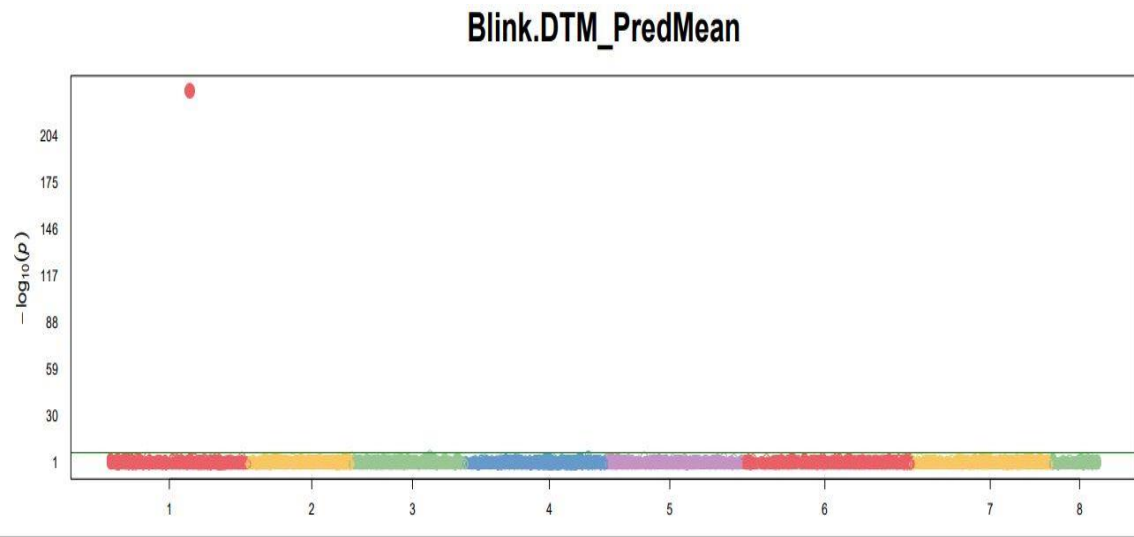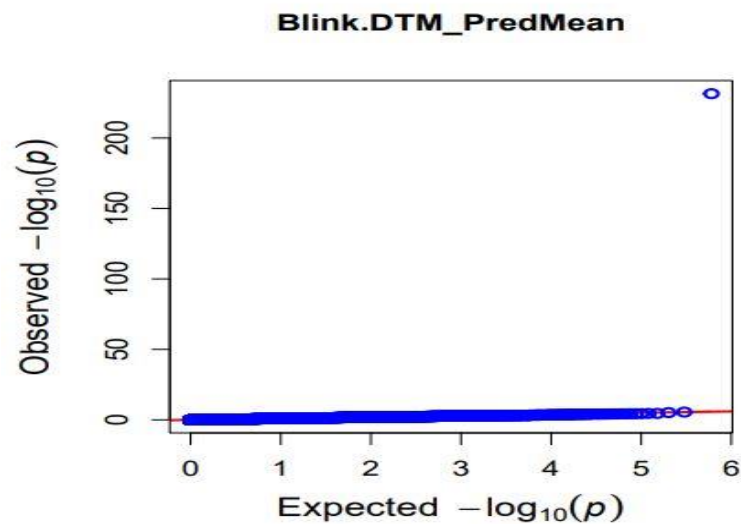

Supplementary Figure3b: Manhattan plot illustrating SNPs linked to Days to maturity along with their corresponding statistical significance represented by Q-Q plot

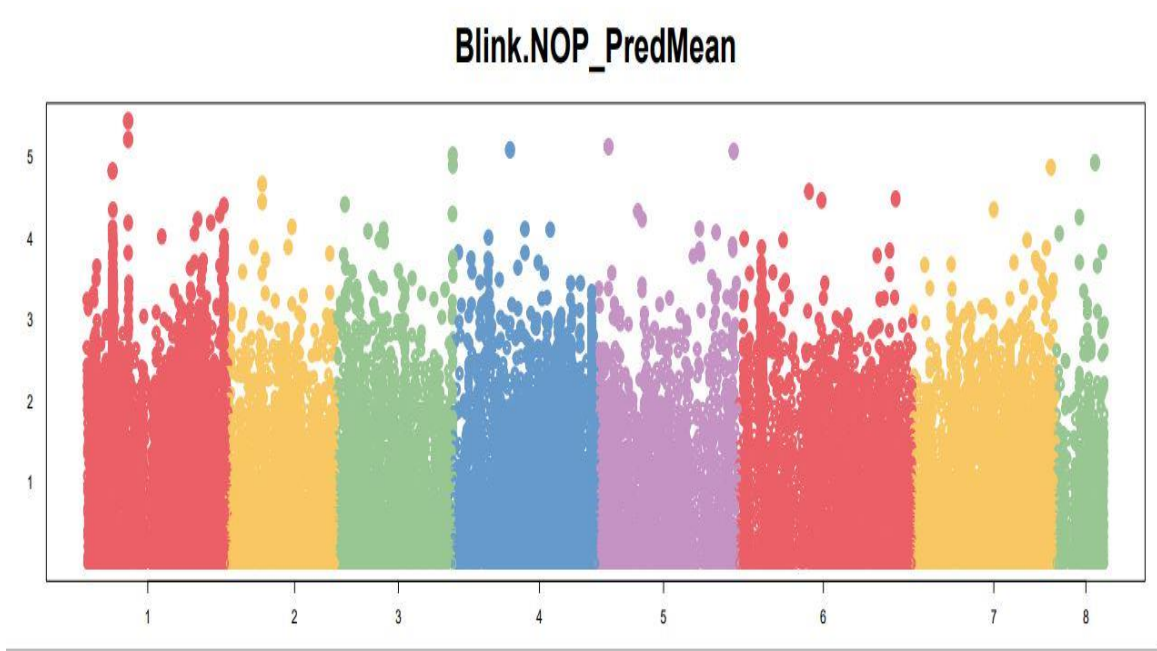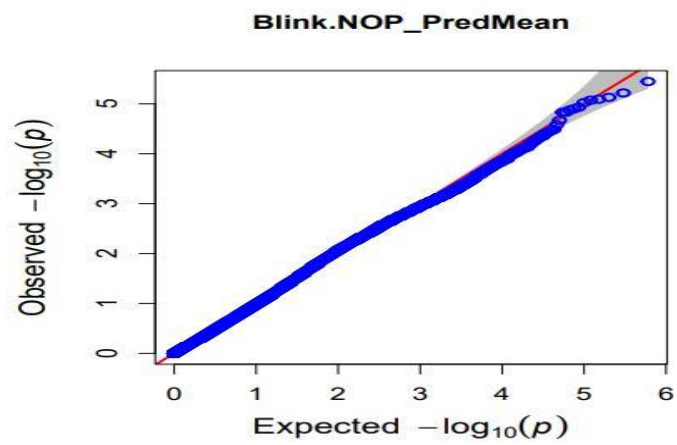

Supplementary Figure3c: Manhattan plot illustrating SNPs linked to number of pods along with their corresponding statistical significance represented by Q-Q plot

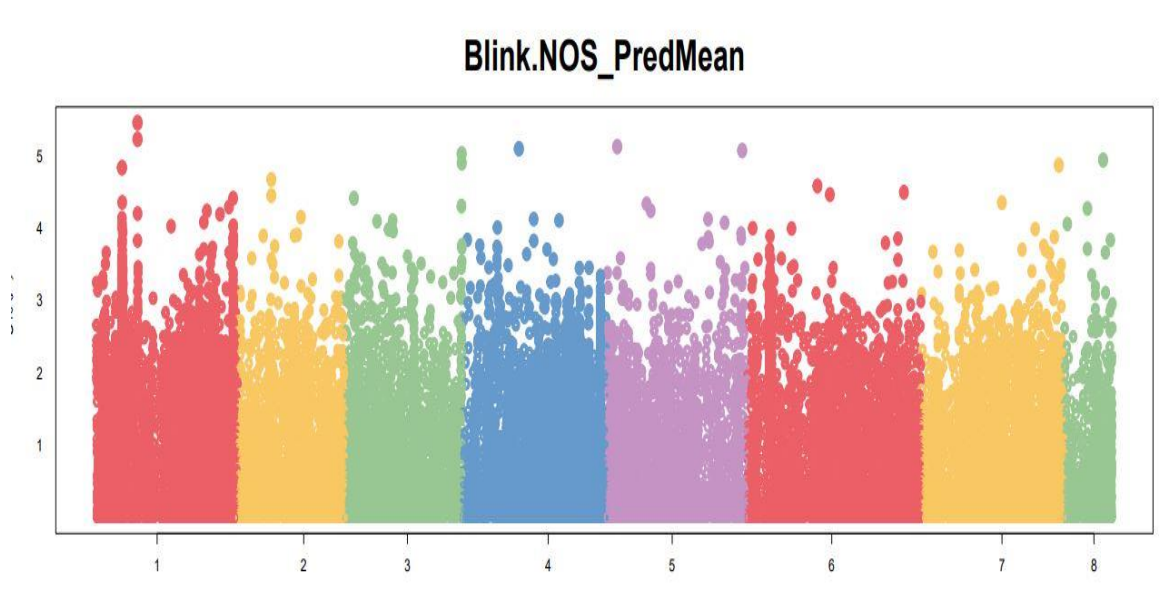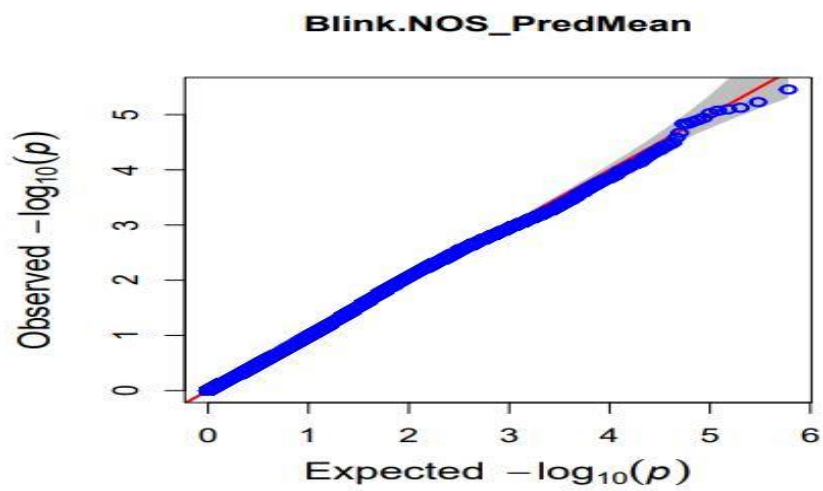

Supplementary Figure3d: Manhattan plot illustrating SNPs linked to number of seeds along with their corresponding statistical significance represented by Q-Q plot

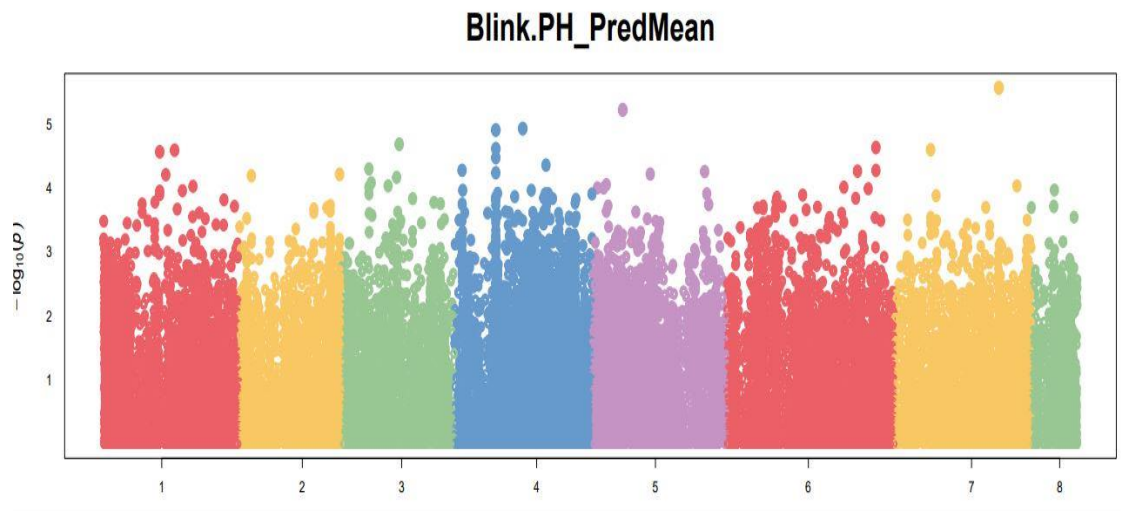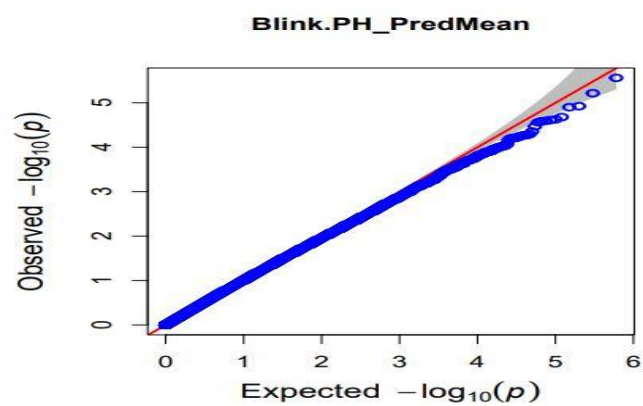

Supplementary Figure3e: Manhattan plot illustrating SNPs linked to plant height along with their corresponding statistical significance represented by Q-Q plot

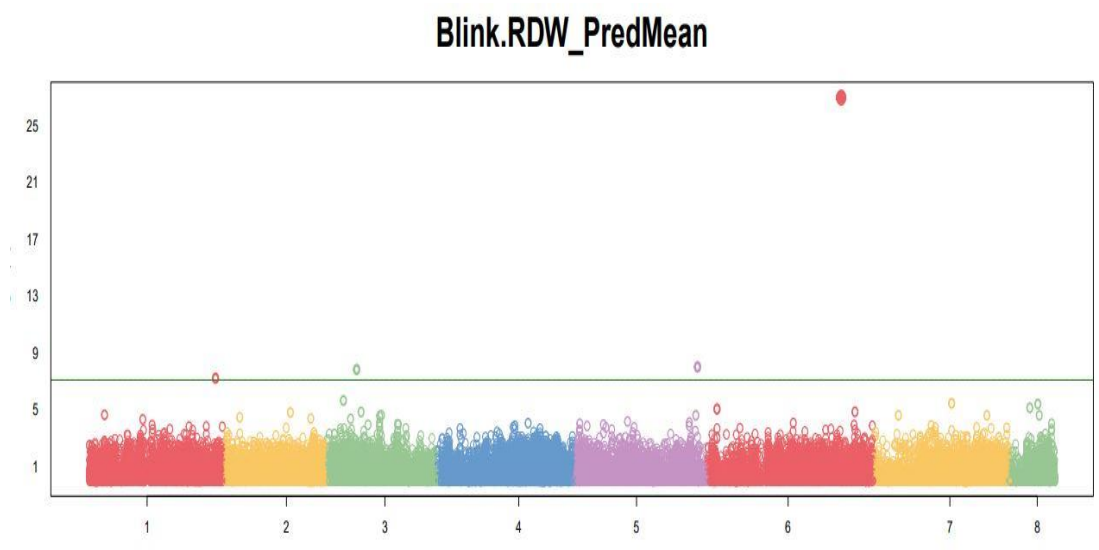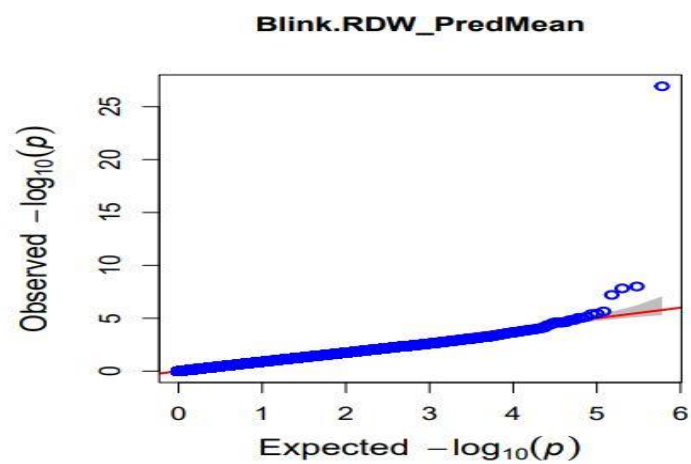

Supplementary Figure3f: Manhattan plot illustrating SNPs linked to root dry weight with their corresponding statistical significance represented by Q-Q plot

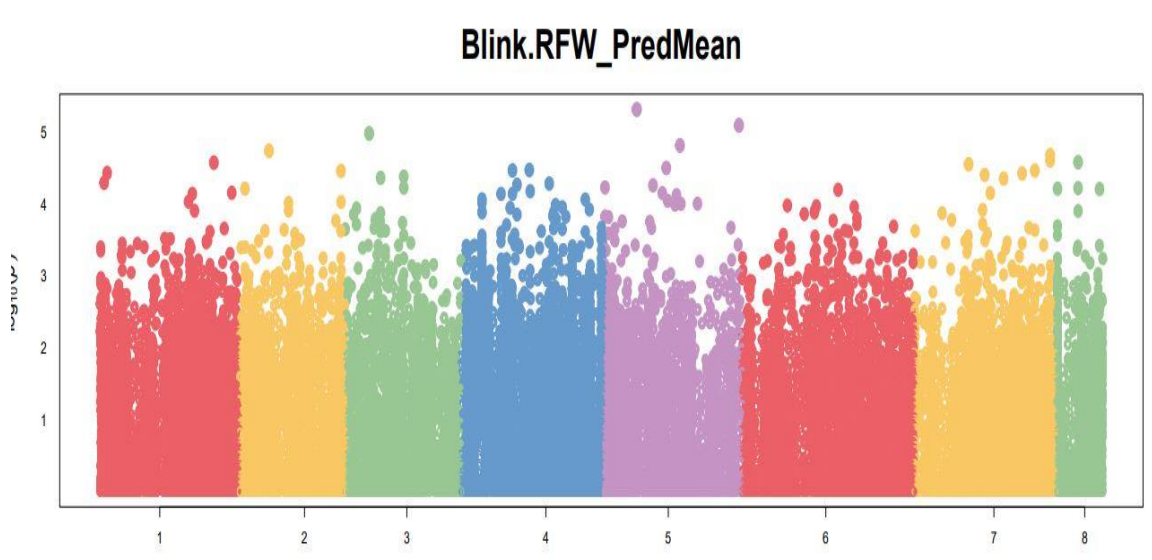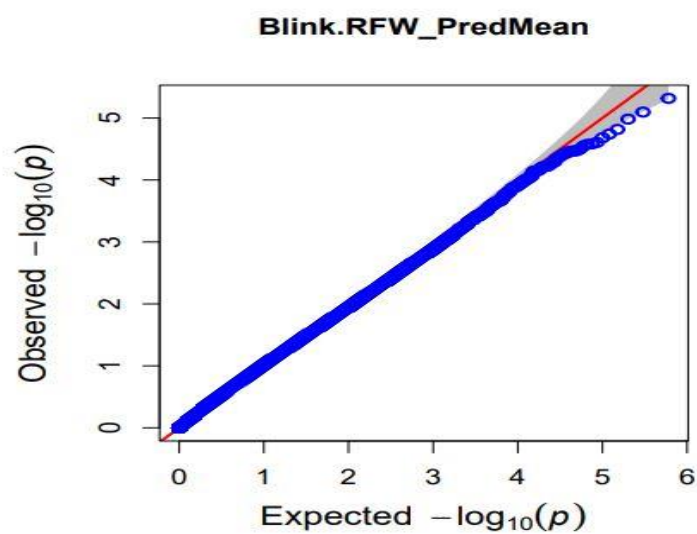

Supplementary Figure3g: Manhattan plot illustrating SNPs linked to root fresh weight

with their corresponding statistical significance represented by Q-Q plot

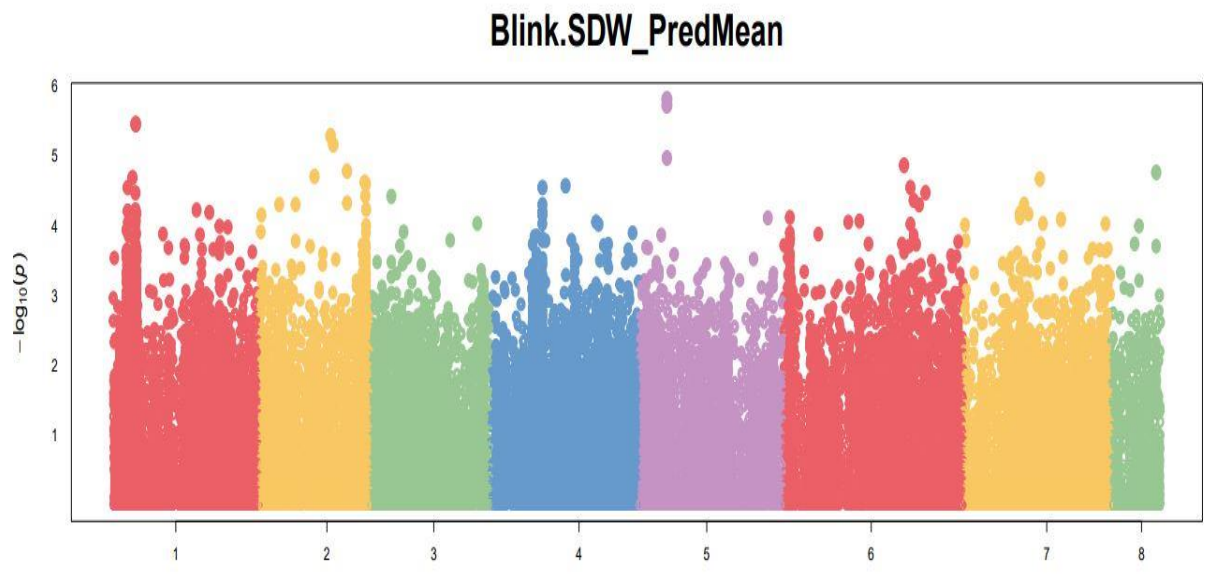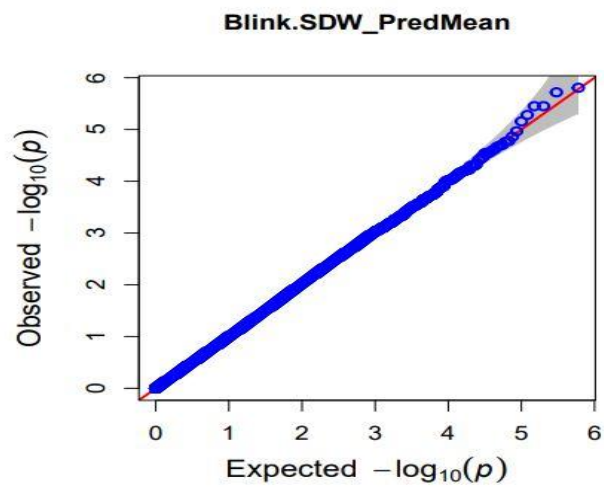

Supplementary Figure3h: Manhattan plot illustrating SNPs linked to r shoot dry weight with their corresponding statistical significance represented by Q-Q plot

H

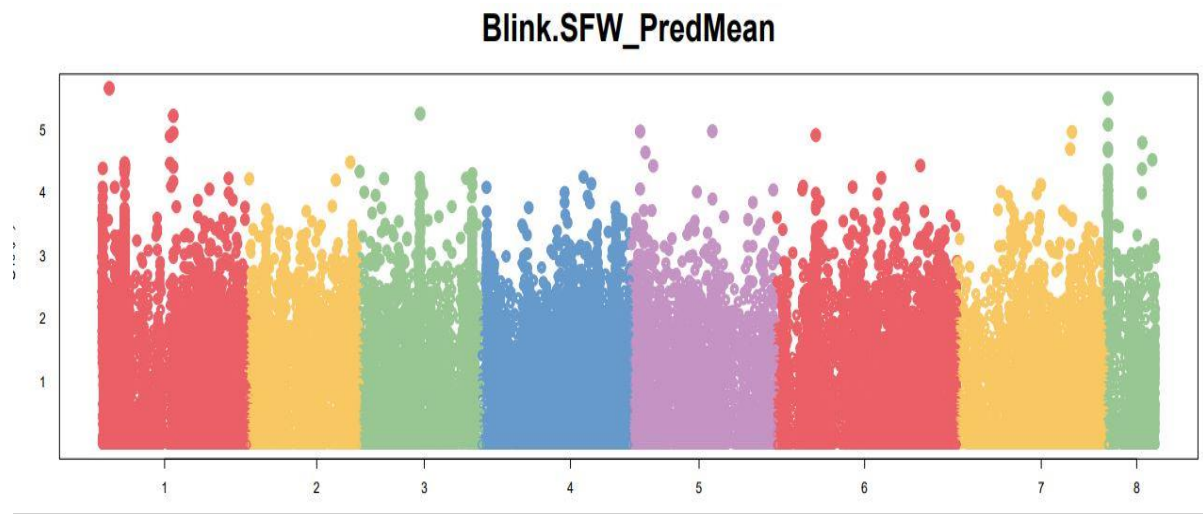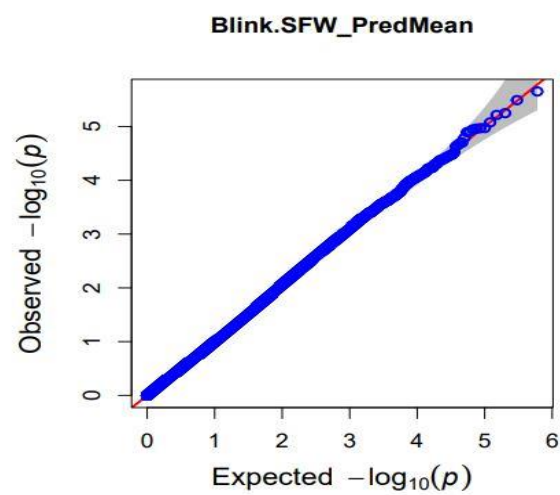

Supplementary Figure3i: Manhattan plot illustrating SNPs linked to shoot fresh weight with their corresponding statistical significance represented by Q-Q plot

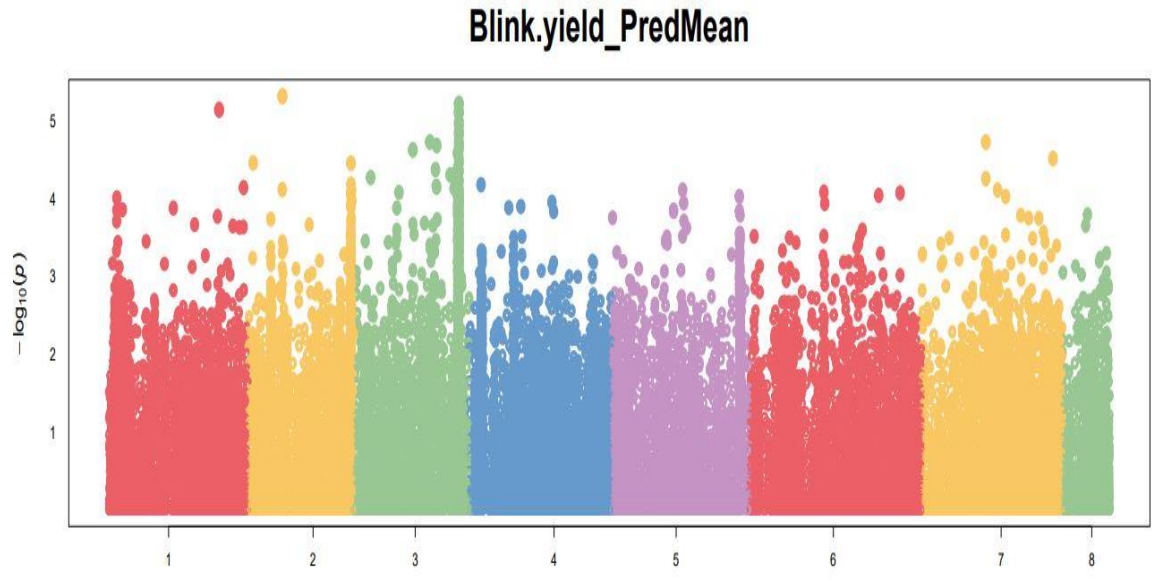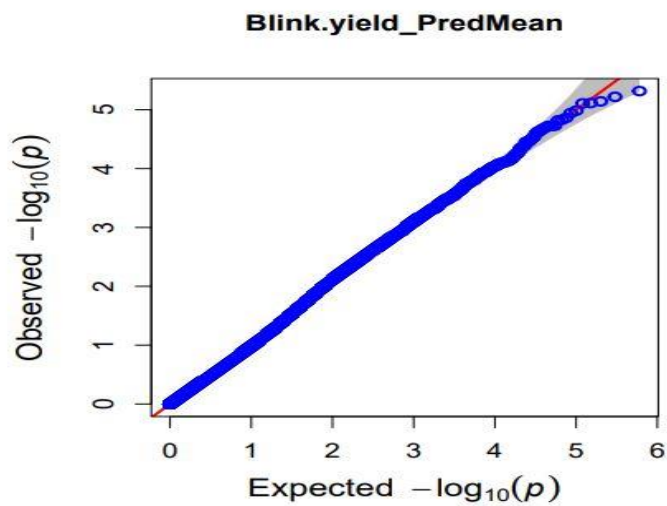

Supplementary Figure3j: Manhattan plot illustrating SNPs linked to yield with their corresponding statistical significance represented by Q-Q plot

**Supplementary Figure3: Manhattan plot illustrating SNPs linked to specific chickpea traits, along with their corresponding statistical significance represented by Q-Q plot for location 1 identified from Blink model.**

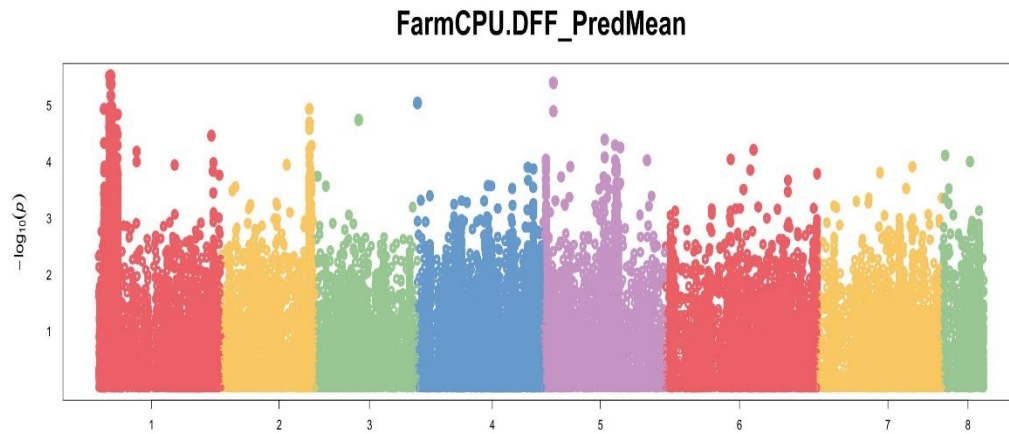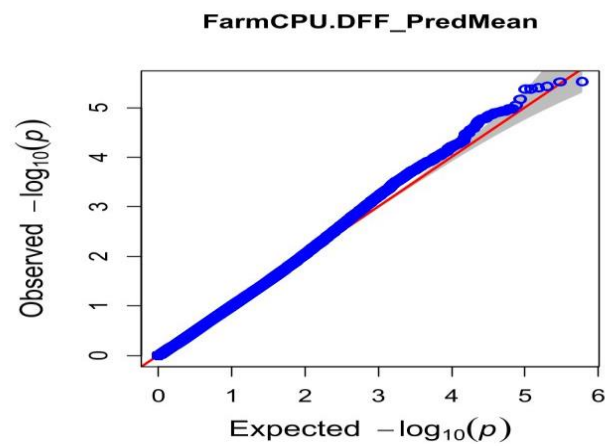

Supplementary Figure4a: Manhattan plot illustrating SNPs linked to Days fifty percentage

flowering along with their corresponding statistical significance represented by Q-Q plot.

FarmCPU.DTM\_PredMean

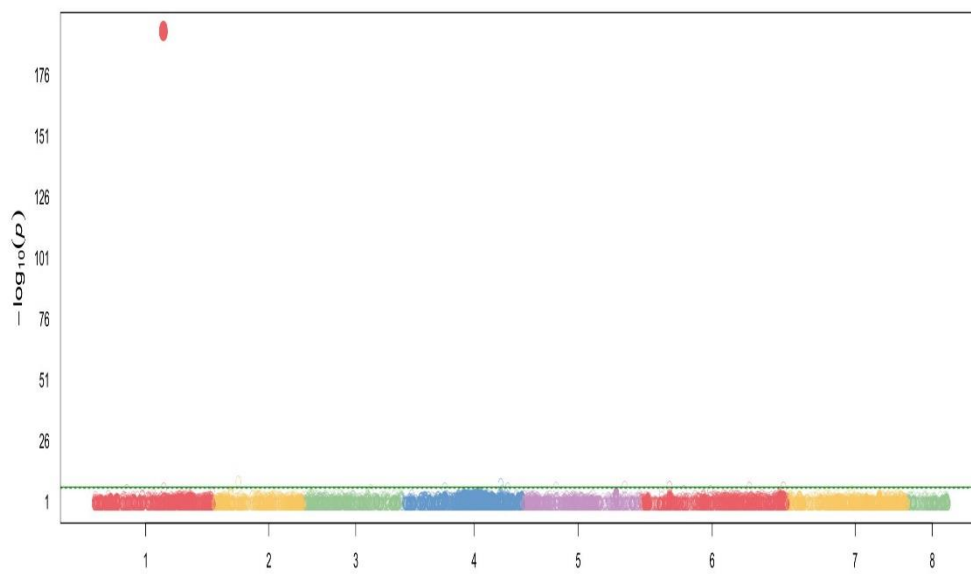

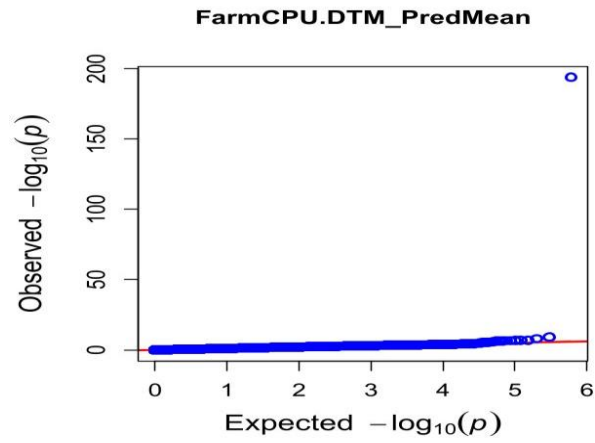

Supplementary Figure4b: Manhattan plot illustrating SNPs linked to Days to maturity along with their corresponding statistical significance represented by Q-Q plot

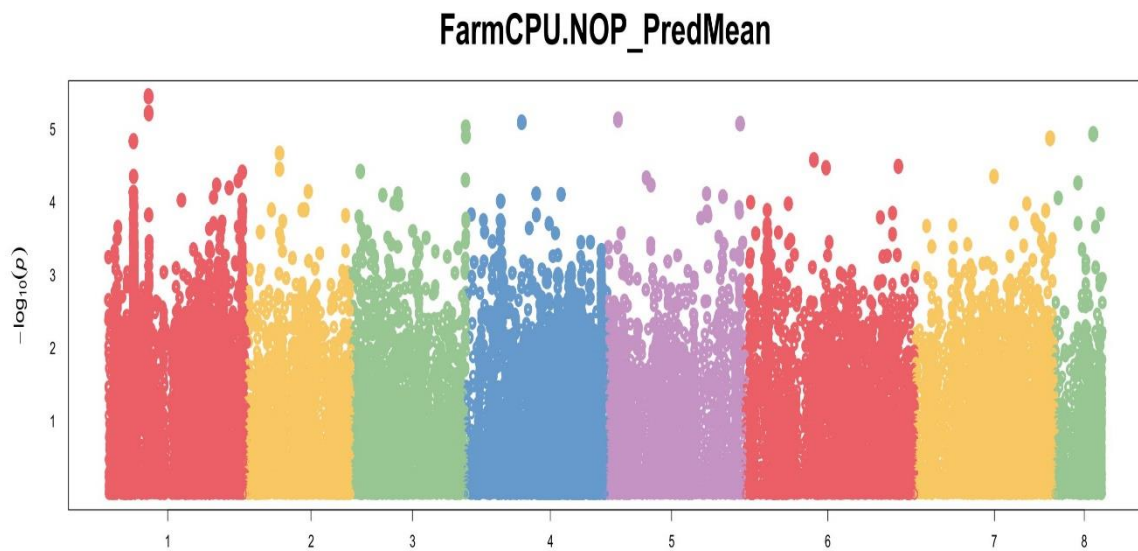

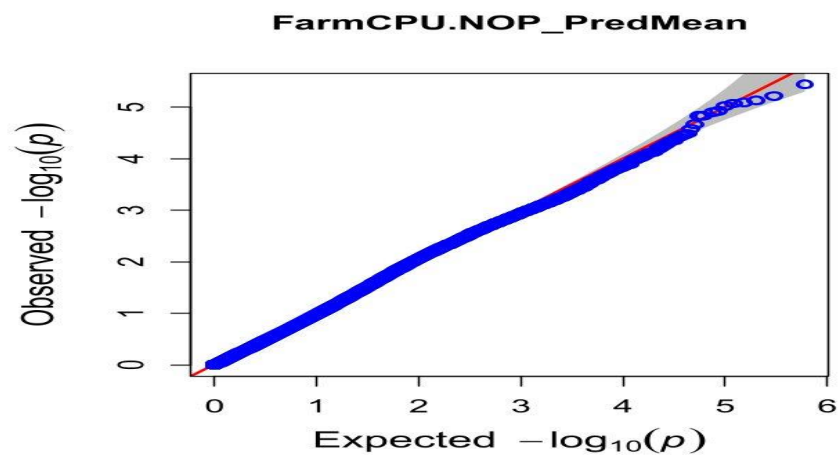

Supplementary Figure4c: Manhattan plot illustrating SNPs linked to number pods of along with their corresponding statistical significance represented by Q-Q plot

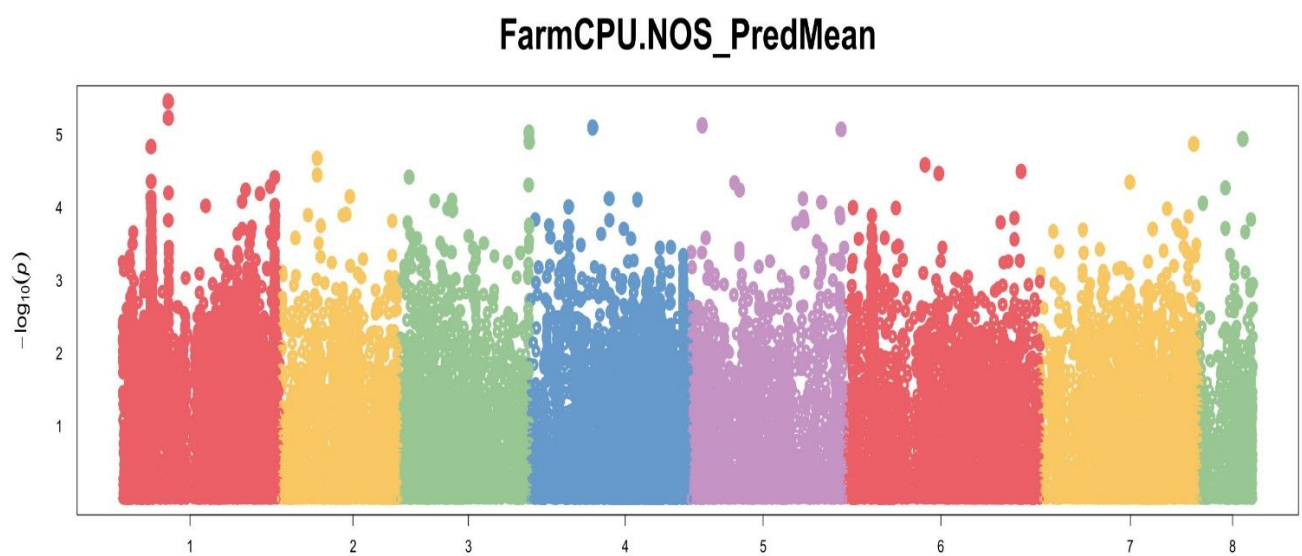

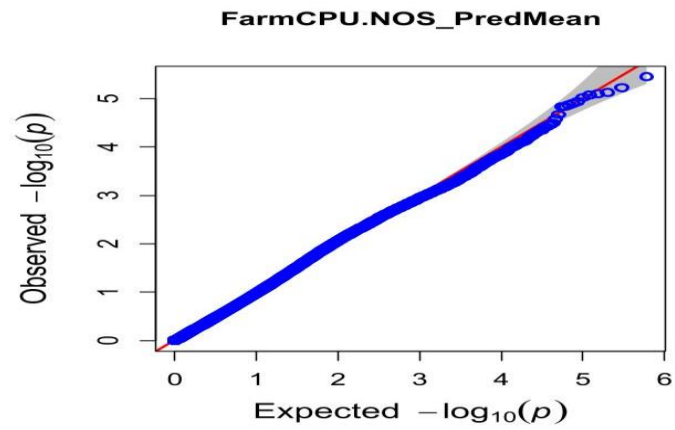

Supplementary Figure4d: Manhattan plot illustrating SNPs linked to number of seeds along with their corresponding statistical significance represented by Q-Q plot

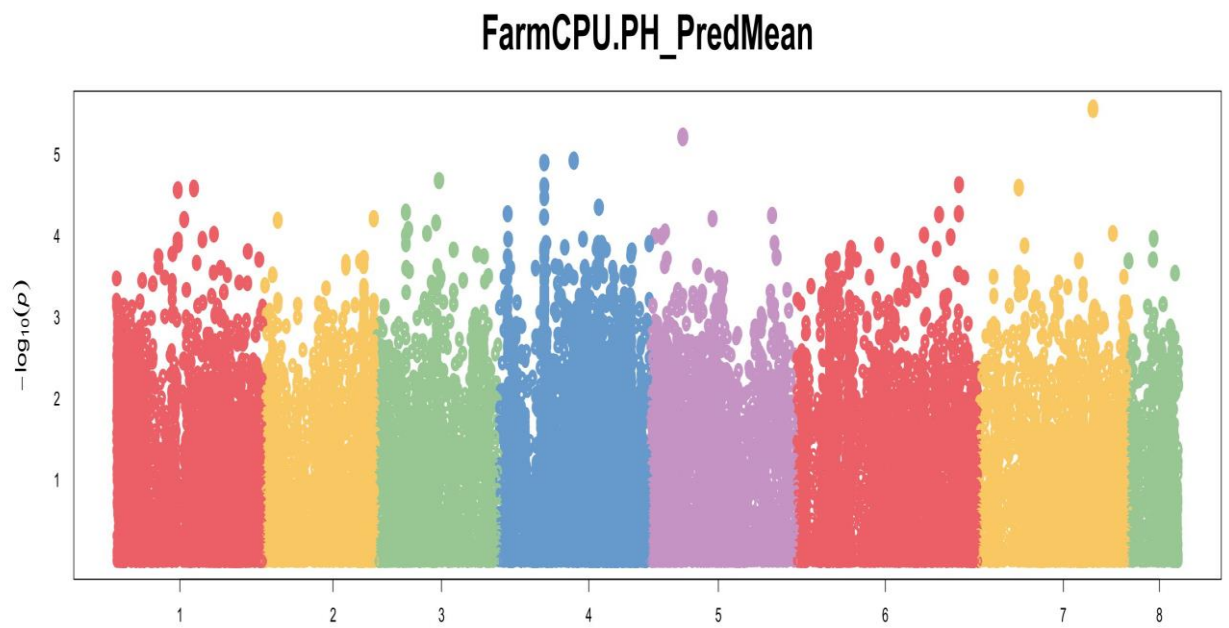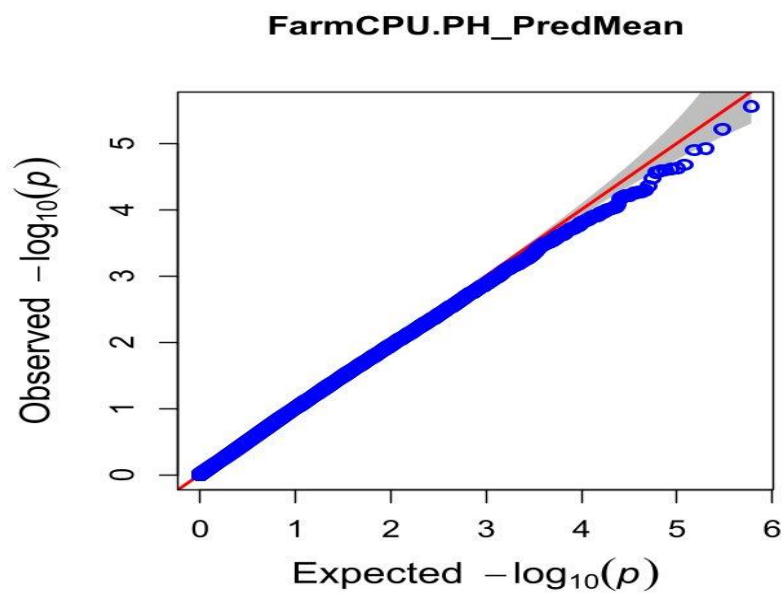

Supplementary Figure4e: Manhattan plot illustrating SNPs linked to plant height along with their corresponding statistical significance represented by Q-Q plot

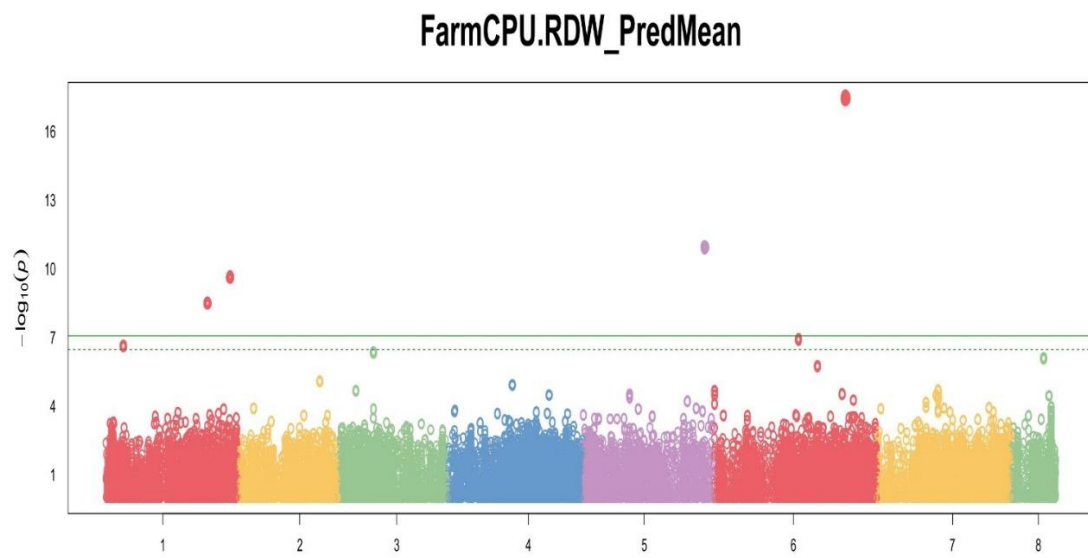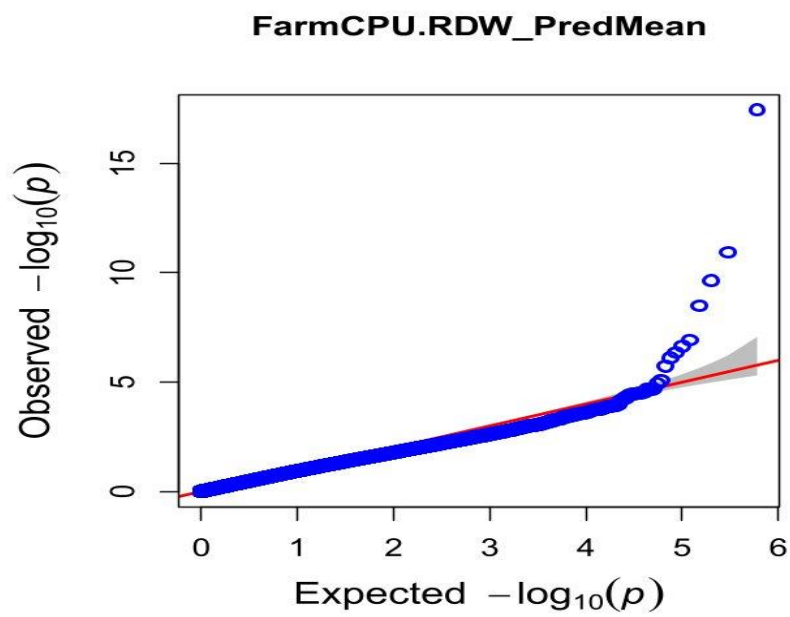

Supplementary Figure4f: Manhattan plot illustrating SNPs linked to root dry weight with their corresponding statistical significance represented by Q-Q plot

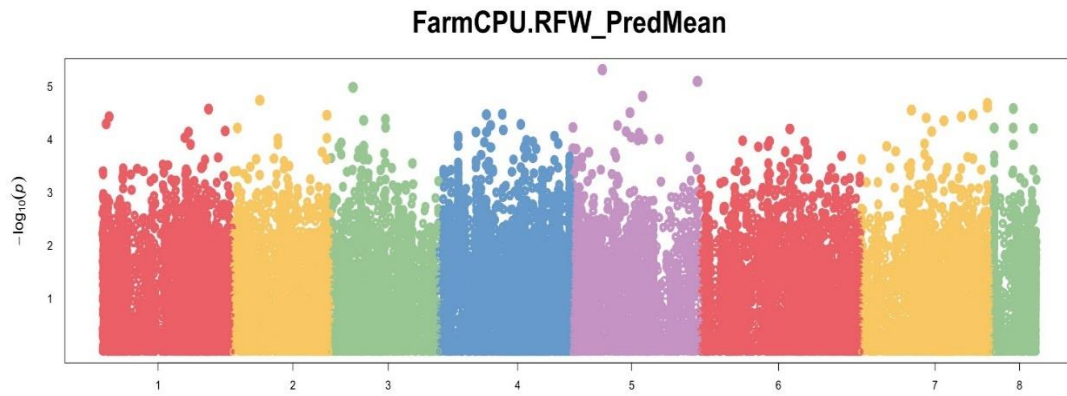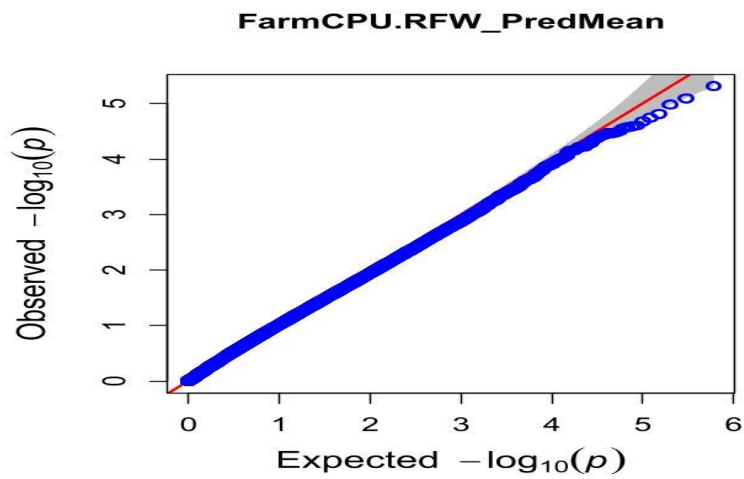

Supplementary Figure4g: Manhattan plot illustrating SNPs linked to root fresh weight with their corresponding statistical significance represented by Q-Q plot

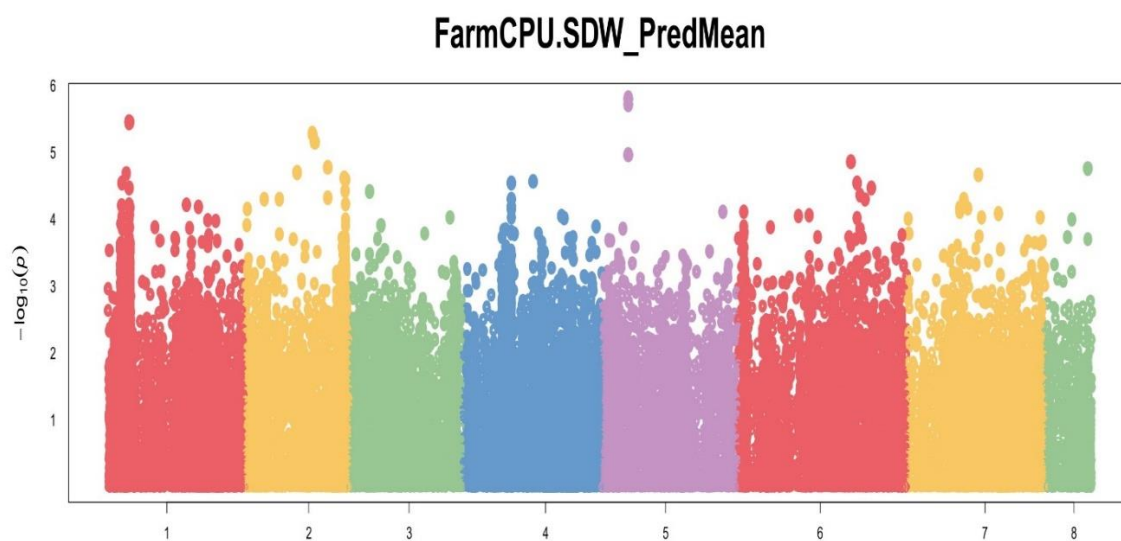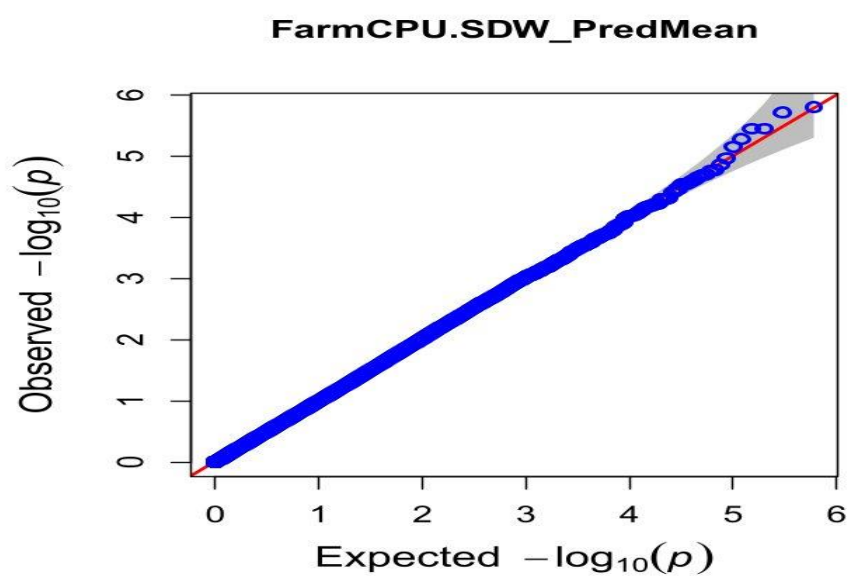

Supplementary Figure4h: Manhattan plot illustrating SNPs linked to shoot dry weight with their corresponding statistical significance represented by Q-Q plot

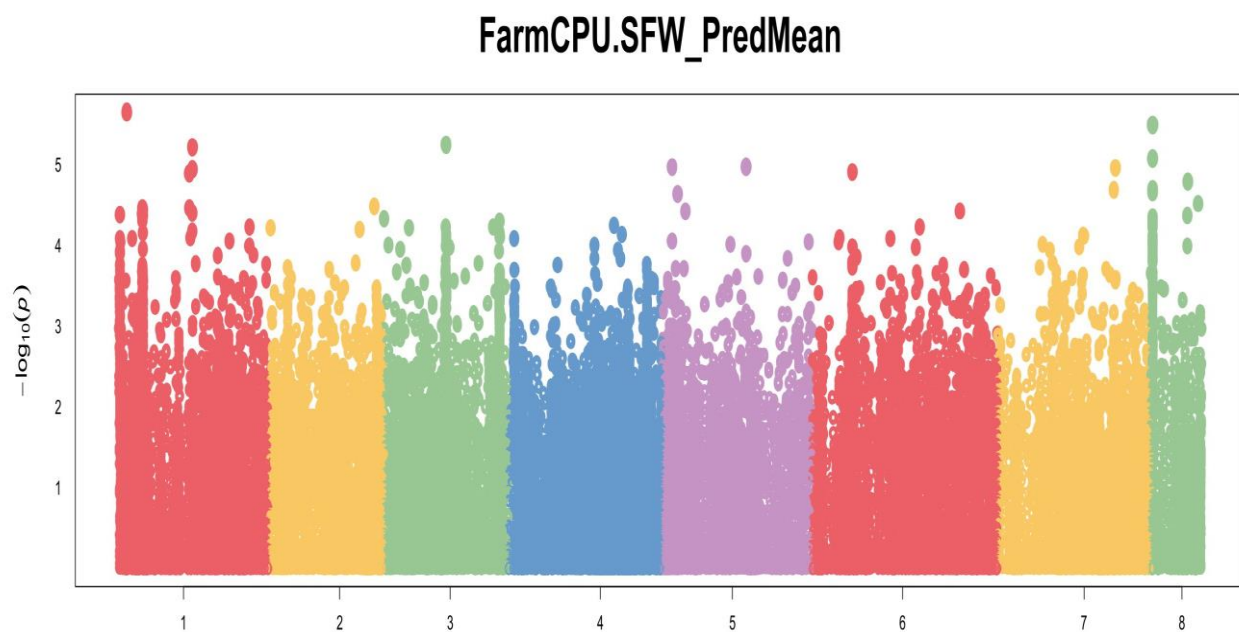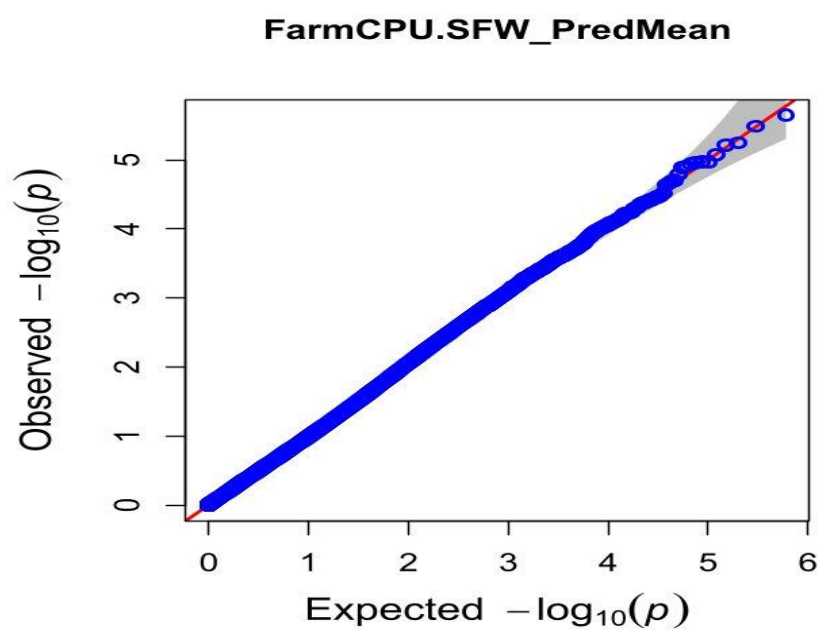

Supplementary Figure4i: Manhattan plot illustrating SNPs linked to shoot fresh weight with their corresponding statistical significance represented by Q-Q plot

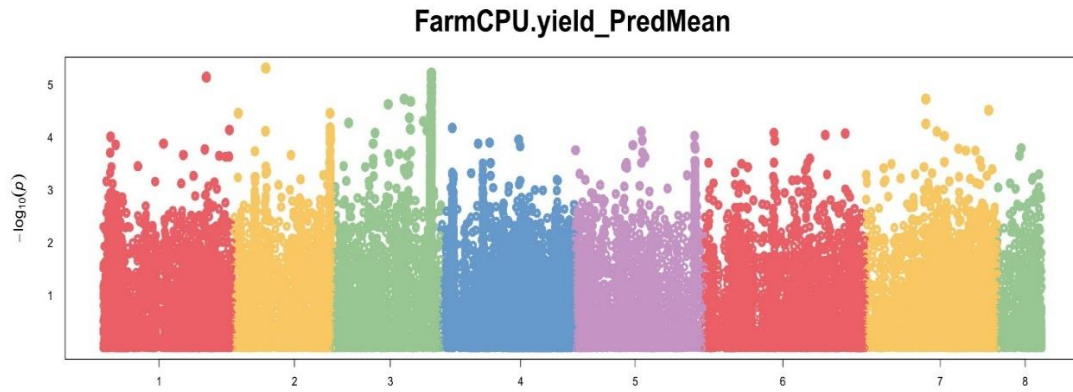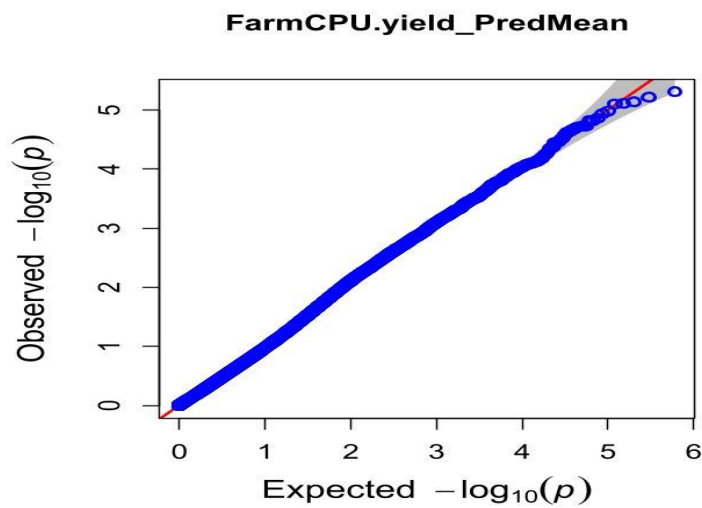

Supplementary Figure4j: Manhattan plot illustrating SNPs linked to yield with their corresponding statistical significance represented by Q-Q plot

**Supplementary Figure4: Manhattan plot illustrating SNPs linked to specific chickpea traits, along with their corresponding statistical significance represented by Q-Q plot for location 2 identified from FarmCPU model**

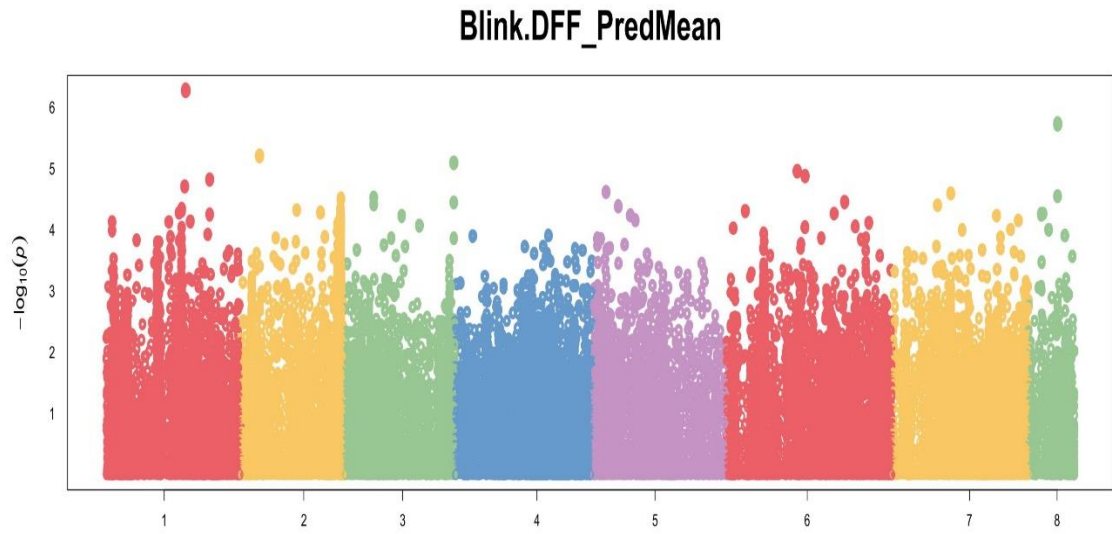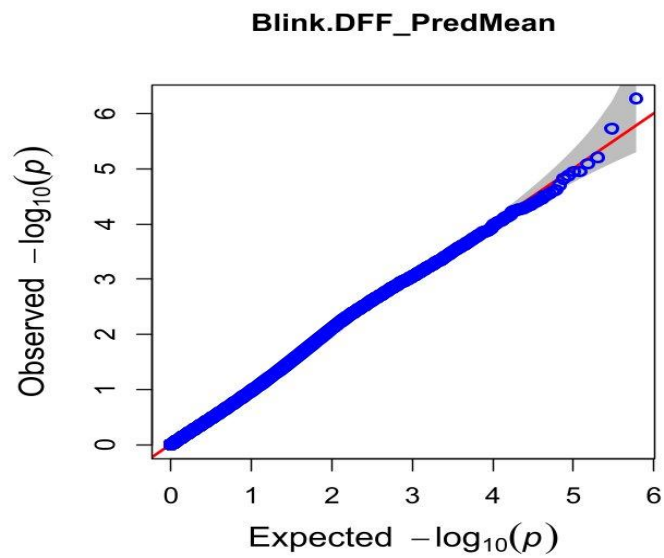

**Supplementary Figure5a: Manhattan plot illustrating SNPs linked to Days fifty percentage flowering along with their corresponding statistical significance represented by Q-Q plot.**

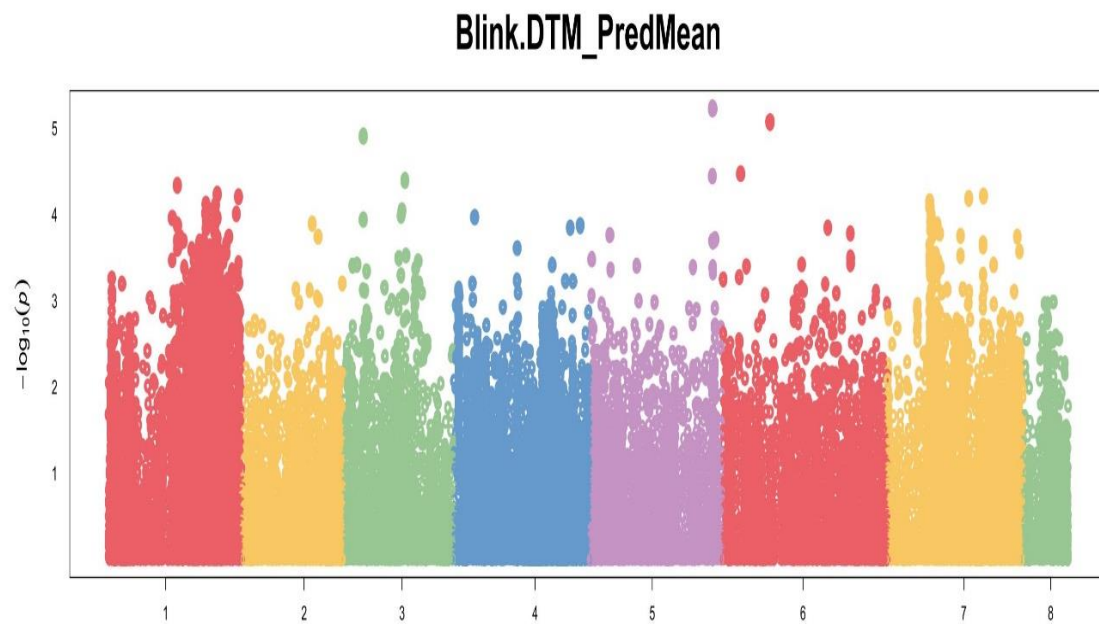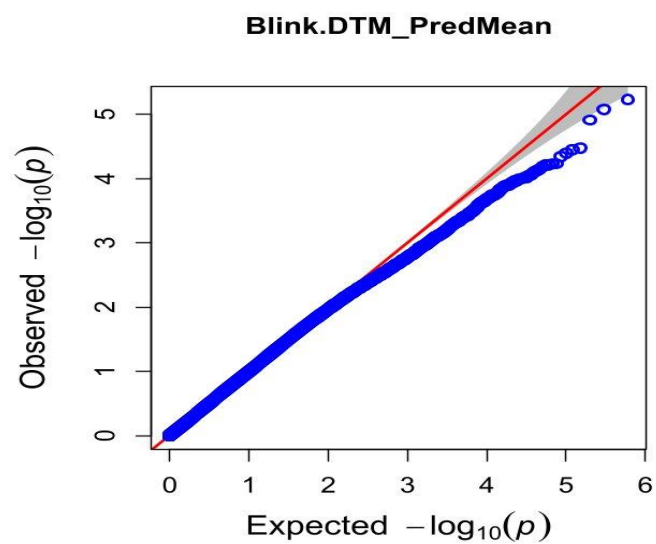

**Supplementary Figure5b: Manhattan plot illustrating SNPs linked to Days to maturity along with their corresponding statistical significance represented by Q-Q plot.**

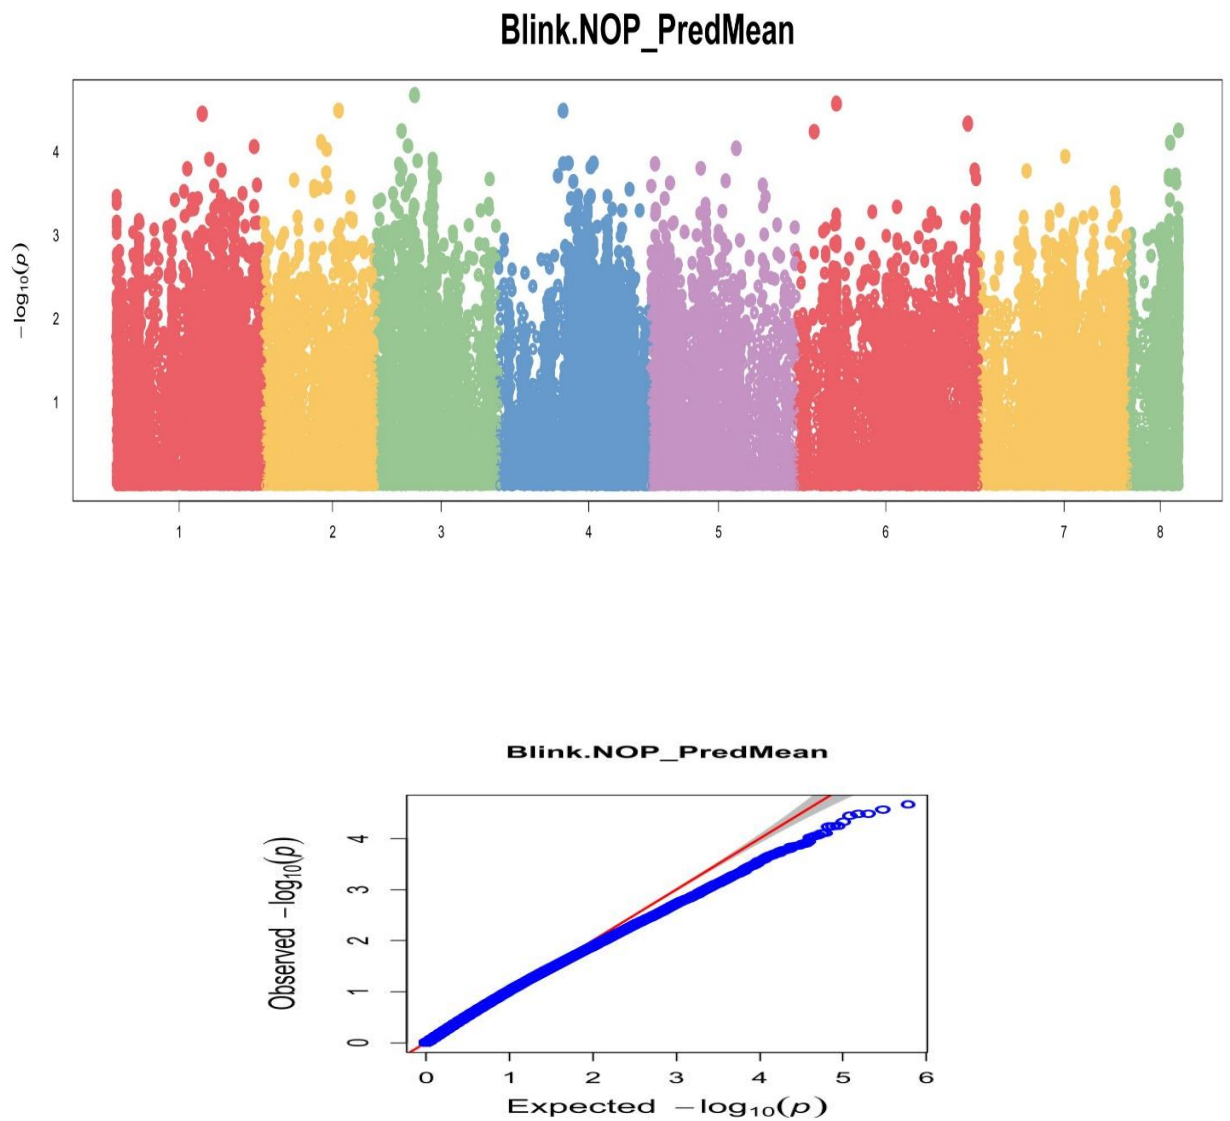

Supplementary Figure5c: Manhattan plot illustrating SNPs linked to number of pods along with their corresponding statistical significance represented by Q-Q plot.

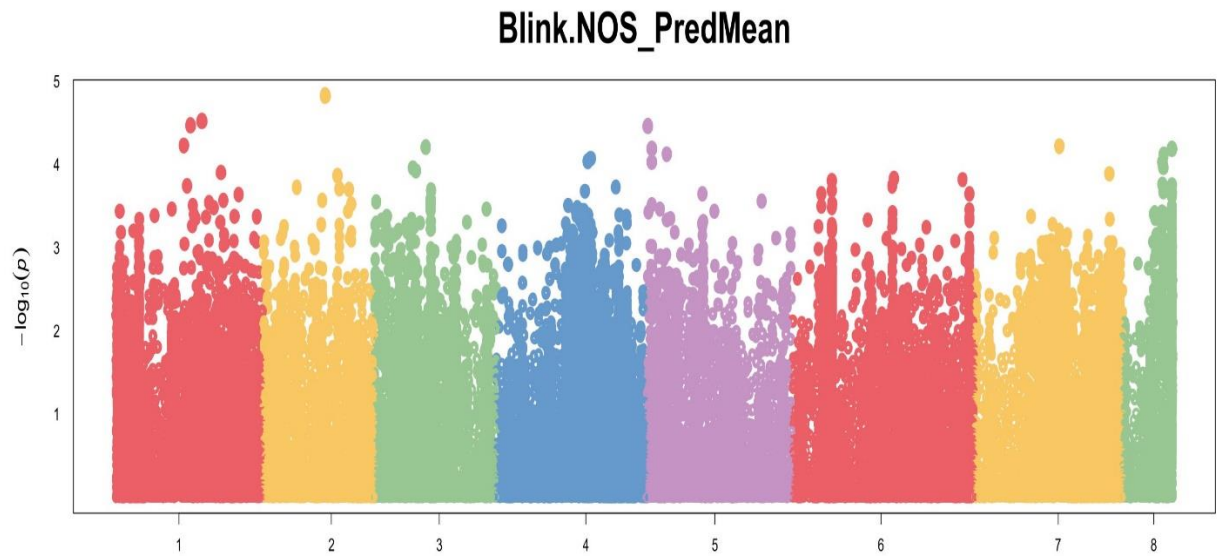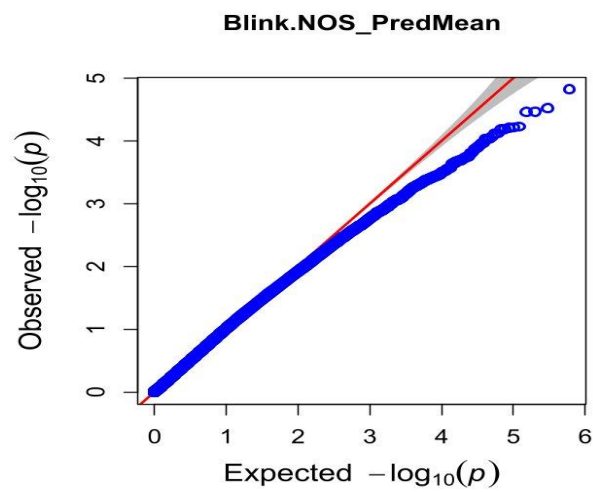

**Supplementary Figure5d: Manhattan plot illustrating SNPs linked to number of seeds along with their corresponding statistical significance represented by Q-Q plot.**

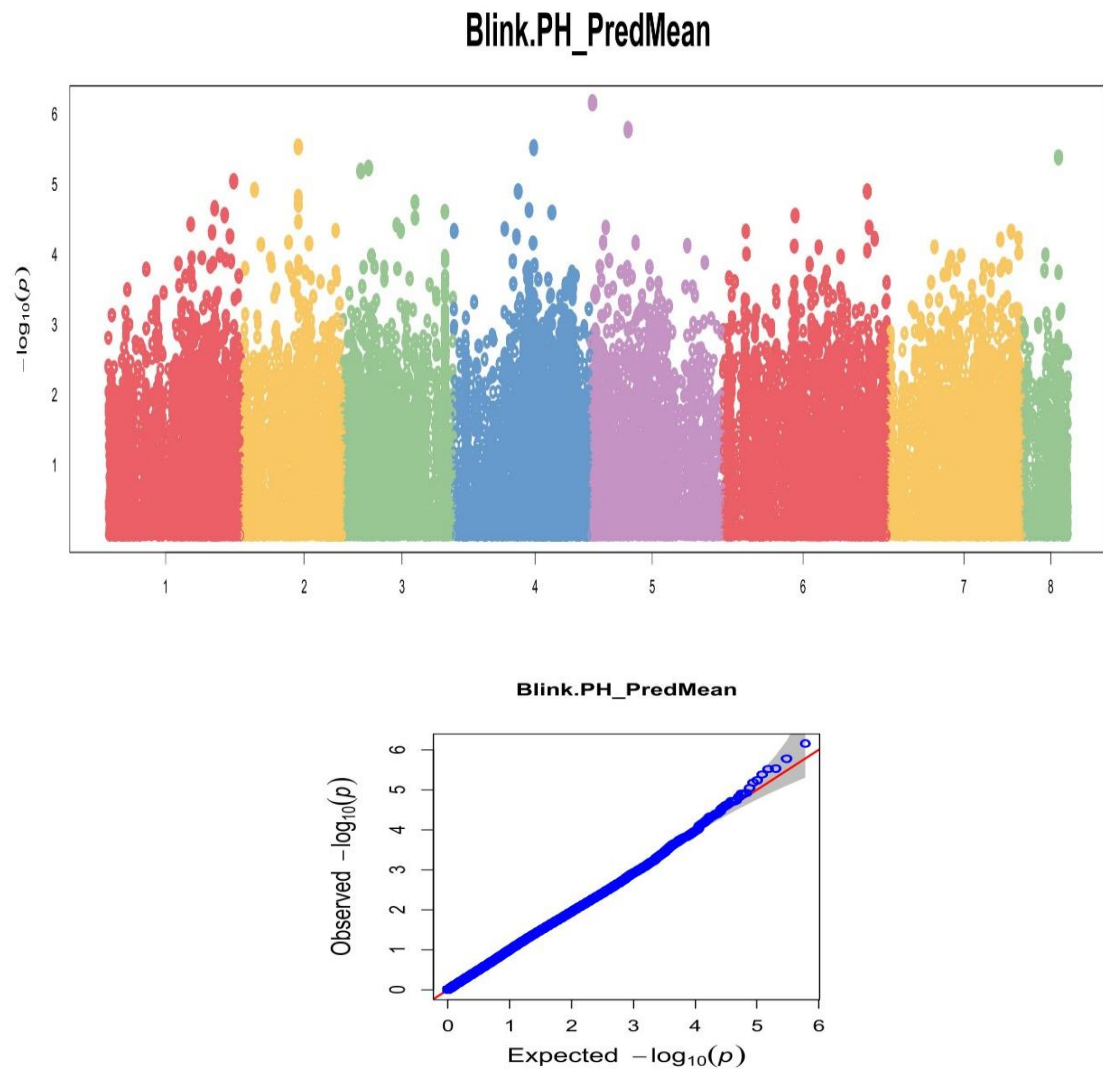

**Supplementary Figure5e:   Manhattan plot illustrating SNPs linked to plant height along with their corresponding statistical significance represented by Q-Q plot**

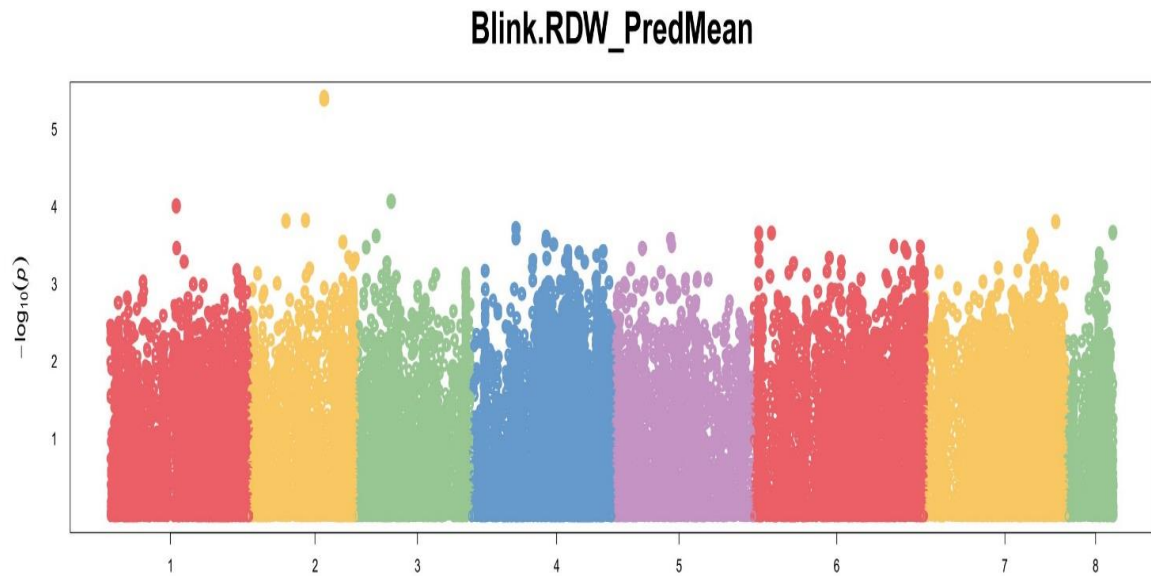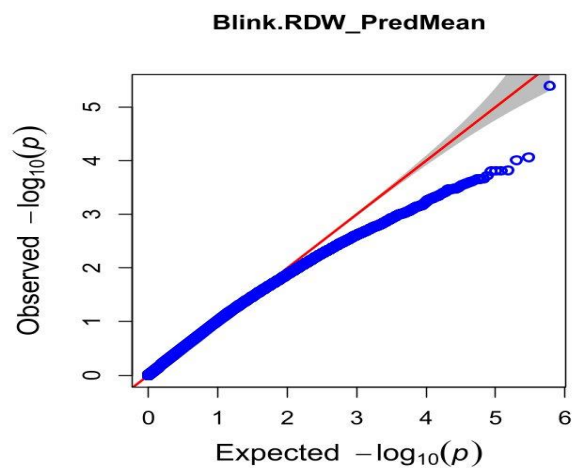

**Supplementary Figure5f: Manhattan plot illustrating SNPs linked to root dry weight with their corresponding statistical significance represented by Q-Q plot**

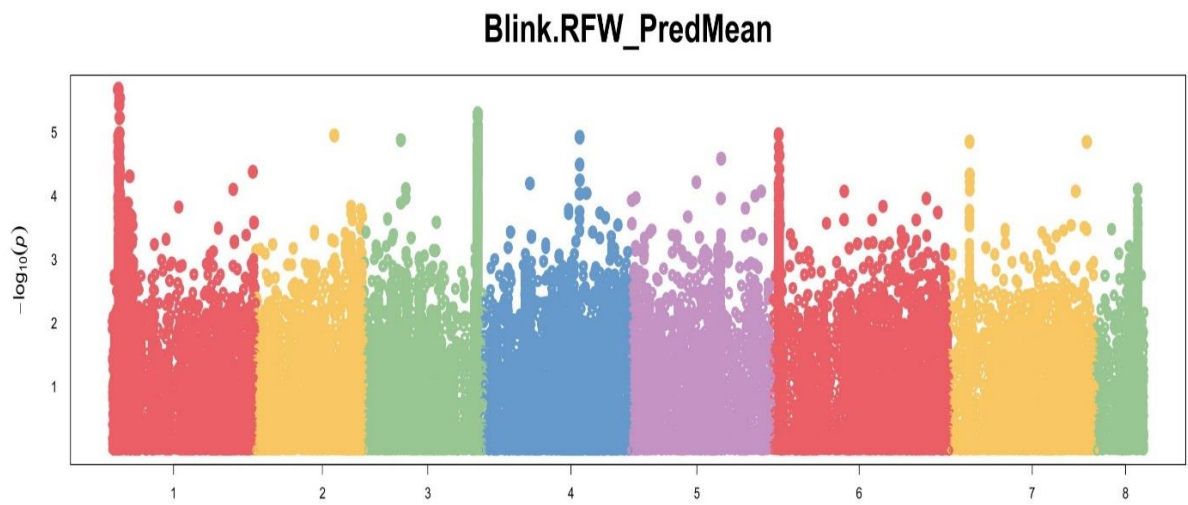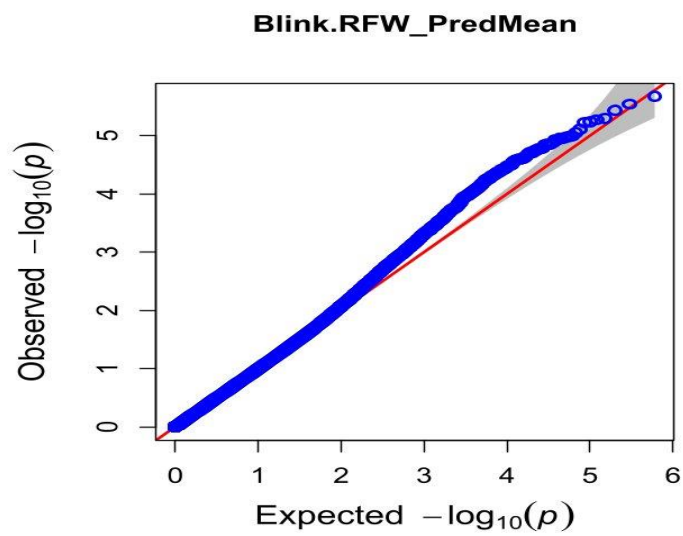

**Supplementary Figure5g: Manhattan plot illustrating SNPs linked to root fresh weight with their corresponding statistical significance represented by Q-Q plot**

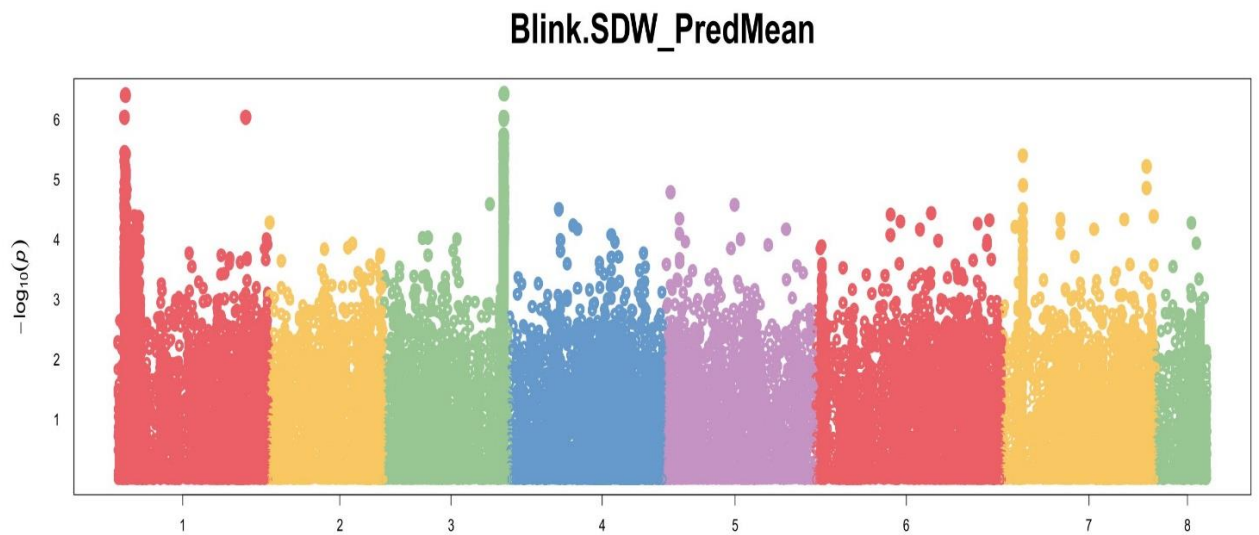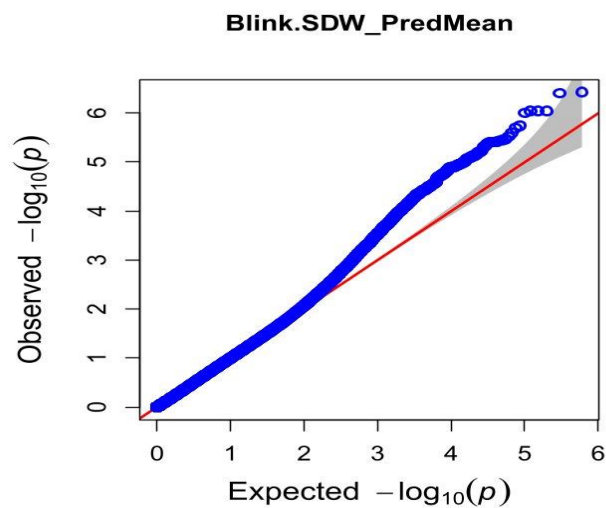

**Supplementary Figure5h: Manhattan plot illustrating SNPs linked to r shoot dry weight with their corresponding statistical significance represented by Q-Q plot**

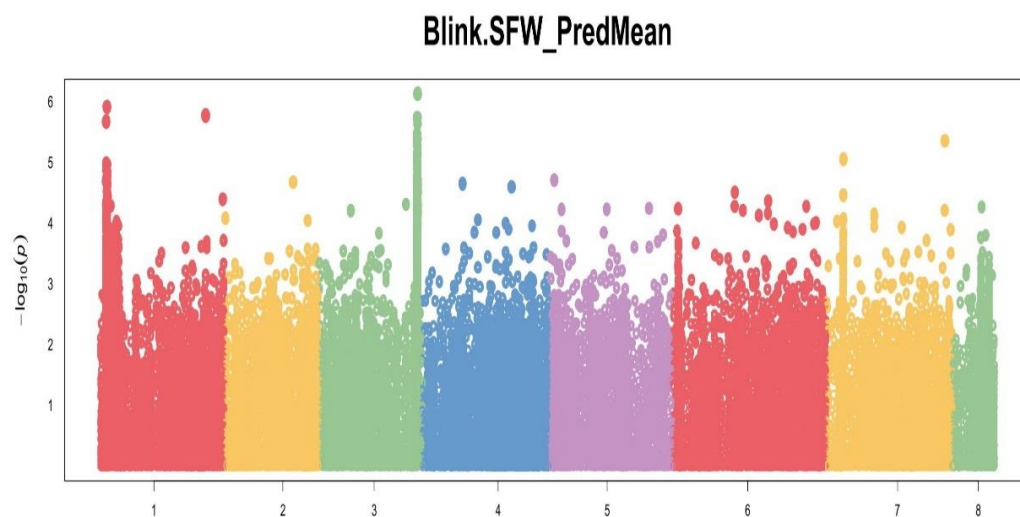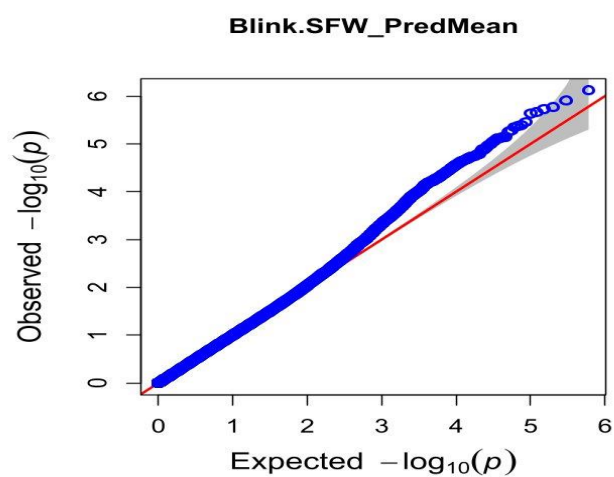

**Supplementary Figure5i: Manhattan plot illustrating SNPs linked to shoot fresh weight with their corresponding statistical significance represented by Q-Q plot**

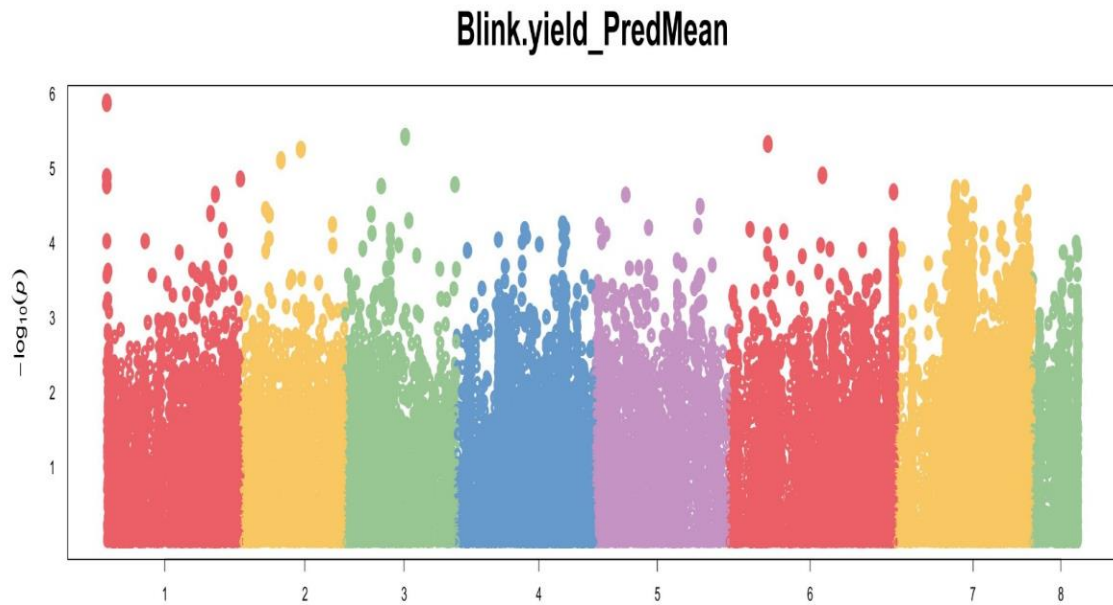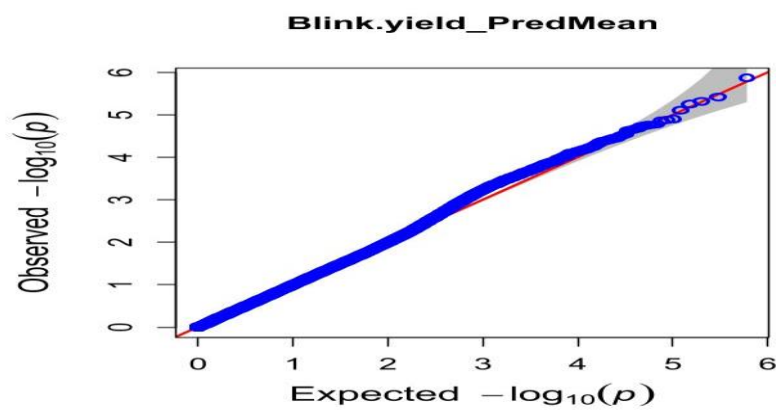

Supplementary Figure5j: Manhattan plot illustrating SNPs linked to yield with their corresponding statistical significance represented by Q-Q plot

**Supplementary Figure5: Manhattan plot illustrating SNPs linked to specific chickpea traits, along with their corresponding statistical significance represented by Q-Q plot for location 2 identified from Blink model.**
